# Supplementary material for: Engineering cell-free systems by chemoproteomic-assisted phenotypic screening
Source: RSC Chem Biol. 2024 Mar 6;5(4):372–85. doi: 10.1039/d4cb00004h (PMC10989505; doi:10.1039/d4cb00004h)
Supplement: CB-005-D4CB00004H-s002 [file CB-005-D4CB00004H-s002.xlsx]

## Sheet: TOC
Table	Description
Supplementary Table S1	Primer sequences used for CFPS plasmid template generation. All primers were purchased from Integrated DNA Technologies (IDT).
Supplementary Table S2	Table summarizing the 457 proteins quantified after filtering, reporting the protein relative ratios with respect to 0.01nM, coefficient of variation (%CoV) across the three TMT replicates and arranged in decreasing order of the magnitude of mean fold change.
Supplementary Table S3	Statistical Summary for 610 proteins heated at 37°C over time from at 5 timepoints (0, 10, 30, 60 and 120 min). Experiment was carried out using two technical replicates and one-way repeated measures ANOVA was used for assessing the time-effect and Benjamini-Hochberg's (BH) correction was used to derive the false discovery rates (FDR).

## Sheet: Supplementary Table S1
	Template	Description	Generated Construct	Primer Name	Sequence (5' --> 3')
1	pJL1-sfGFP	PolyA(90) insertion downstream of sfGFP	pJL1-sfGFP-PolyA90	POLYA90-F	AAAAAAAAAAAAAAAAAAAAAAAAAAAAAAAAAAAAAAAAAAAAAAAAAAAAAAAAAAAAAAAGTCGACCGGCTGCTAACAAAG
2				POLYA90-R	TTTTTTTTTTTTTTTTTTTTTTTTTTTTCAGGATCCGTGGTGATGATGGTGATGGGAACCCGTAATACCTGCCGCATTCACAT
3	pJL1-sfGFP-PolyA90	TMVΩ insertion upstream of sfGFP ORF	pJL1-TMVΩ-sfGFP-PolyA90	inv-sfGFP-TMV Omega-F	ACAAACAACATTACAATTACTATTTACAATTACATATGAGCAAAGGTGAAGA
4				inv-pJL1-TEV Omega-R	TGTTTGTTGTTGTTGGTAATTGTTGTAAAAATACTCCCTATAGTGAGTCGTATTA
5	nLuc	nLuc insert for In-Fusion cloning	pJL1-TMVΩ-nLuc-PolyA90	inf-NdeI-6His-TMVomega-F	ATTTACAATTACATATGGTCTTCACACTCGAAGAT
6				inf-BamHI-nLuc-PA90-R	TTTTTTTTCAGGATCCTTATTTTTCGAACTGCGG
7	p53	p53 insert for In-Fusion cloning	pJL1-TMVΩ-p53-PolyA90	inf-NdeI-6His-TMVomega-F	ATTTACAATTACATATGCATCACCACCACCACCACG
8				inf-BamHI-p53-PA90-R	TTTTTTTTCAGGATCCTCAGTCTGAGTCAGGCCCTTCT
9	MDM2	MDM2 insert for In-Fusion cloning	pJL1-TMVΩ-MDM2-PolyA90	inf-TMVomega-NdeI-MDM2-F	ATTTACAATTACATATGGCAATACCAACATGTCTGTACCTACTGA
10				inf-BamHI-MDM2-PolyA90-R	TTTTTTTTCAGGATCCTTAGGGGAAATAAGTTAGCACAATCATTTGAATTGG

## Sheet: Supplementary Table S2
Accession	Description	ProtDescription	GeneName	Drug_0.01nM_R1	Drug_0.1nM_R1	Drug_1nM_R1	Drug_100nM_R1	Drug_1uM_R1	Drug_10uM_R1	Drug_100uM_R1	Drug_1mM_R1	Drug_0.01nM_R2	Drug_0.1nM_R2	Drug_1nM_R2	Drug_100nM_R2	Drug_1uM_R2	Drug_10uM_R2	Drug_100uM_R2	Drug_1mM_R2	Drug_0.01nM_R3	Drug_0.1nM_R3	Drug_1nM_R3	Drug_100nM_R3	Drug_1uM_R3	Drug_10uM_R3	Drug_100uM_R3	Drug_1mM_R3	cov1_first3	cov2_first3	cov3_first3	cov1_last3	cov2_last3	cov3_last3	mean_Ratio1_first3	mean_Ratio2_first3	mean_Ratio3_first3	mean_Ratio1_last3	mean_Ratio2_last3	mean_Ratio3_last3	Grandmu_first3	Grandmu_last3	meanFoldChange
P40150	Ribosome-associated molecular chaperone SSB2 OS=Saccharomyces cerevisiae (strain ATCC 204508 / S288c) GN=SSB2 PE=1 SV=2	Ribosome-associated molecular chaperone SSB2	SSB2	0	0.281398	0.259372	0.336867	0.804878	0.639368	0.651184	0.686063	0	0.480406	0.141016	0.339869	0.21367	0.885035	0.593235	0.790593	0	0.156504	0.0370893	0.152003	0.493633	0.331912	0.48292	0.439254	0.105	0.176	0.057	0.006	0.101	0.053	1.14	1.17	1.05	1.56	1.7	1.34	1.12	1.53	1.37
P10591	Heat shock protein SSA1 OS=Saccharomyces cerevisiae (strain ATCC 204508 / S288c) GN=SSA1 PE=1 SV=4	Heat shock protein SSA1	SSA1	0	-0.00590993	0.117102	0.035245	0.406193	0.343282	0.254386	0.227854	0	0.478228	0.164034	0.564437	0.321458	0.822394	0.659247	0.877832	0	0.0606755	0.00169258	0.337958	0.465974	0.21422	0.430257	0.53502	0.049	0.172	0.024	0.044	0.077	0.111	1.03	1.17	1.01	1.23	1.73	1.32	1.07	1.43	1.33
P40040	Protein THO1 OS=Saccharomyces cerevisiae (strain ATCC 204508 / S288c) GN=THO1 PE=1 SV=1	Protein THO1	THO1	0	0.335528	0.427407	0.626702	0.593033	0.656382	0.62414	0.643788	0	0.288005	0.275993	0.348603	0.453416	0.657608	0.416783	0.567929	0	0.341746	0.249854	0.594613	0.522298	0.59851	0.391054	0.519364	0.15	0.109	0.119	0.016	0.083	0.072	1.2	1.14	1.15	1.56	1.46	1.42	1.17	1.48	1.27
P35691	Translationally-controlled tumor protein homolog OS=Saccharomyces cerevisiae (strain ATCC 204508 / S288c) GN=TMA19 PE=1 SV=1	Translationally-controlled tumor protein homolog	TMA19	0	0.0114764	0.0377079	0.282211	0.325925	0.238674	0.167565	-0.328919	0	0.454902	0.00723675	0.507612	0.293458	0.755502	0.621126	0.757955	0	-0.0951212	-0.0337206	0.105554	0.127513	0.206662	0.290805	0.127513	0.013	0.189	0.033	0.035	0.053	0.057	1.01	1.13	0.97	1.15	1.64	1.16	1.04	1.32	1.27
P16547	Mitochondrial outer membrane protein OM45 OS=Saccharomyces cerevisiae (strain ATCC 204508 / S288c) GN=OM45 PE=1 SV=2	Mitochondrial outer membrane protein OM45	OM45	0	0.0237258	-0.0090831	0.128165	0.342131	0.312642	0.444908	1.04837	0	0.0170149	0.055675	0.160579	0.203263	0.363148	0.242982	0.512926	0	-0.0417159	-0.0791714	0.134385	0.14083	0.166639	0.136214	0.451007	0.012	0.02	0.027	0.065	0.094	0.124	1	1.02	0.97	1.3	1.3	1.2	1	1.27	1.27
P06208	2-isopropylmalate synthase OS=Saccharomyces cerevisiae (strain ATCC 204508 / S288c) GN=LEU4 PE=1 SV=1	2-isopropylmalate synthase	LEU4	0	0.178749	0.143125	0.358631	0.706554	-0.00443225	0.365517	-0.541373	0	0.357377	0.331942	0.420411	0.546165	0.806329	0.717455	0.850785	0	0.455115	0.282099	0.358048	0.842719	0.460047	0.678918	0.494109	0.064	0.132	0.156	0.18	0.047	0.083	1.08	1.18	1.2	1.14	1.73	1.46	1.15	1.45	1.26
P52286	Suppressor of kinetochore protein 1 OS=Saccharomyces cerevisiae (strain ATCC 204508 / S288c) GN=SKP1 PE=1 SV=2	Suppressor of kinetochore protein 1	SKP1	0	-0.123222	0.0650401	0.0343471	0.163432	0.0824414	-0.00224428	-0.957283	0	0.361967	0.253057	0.433705	0.419293	0.757124	0.642678	0.747465	0	0.0800088	0.0270725	0.254803	0.350341	0.395405	0.275176	0.427932	0.066	0.125	0.028	0.041	0.043	0.055	0.99	1.16	1.03	1.03	1.64	1.29	1.06	1.32	1.25
P53184	Nicotinamidase OS=Saccharomyces cerevisiae (strain ATCC 204508 / S288c) GN=PNC1 PE=1 SV=1	Nicotinamidase	PNC1	0	-0.00277441	-0.187704	-0.347797	0.163598	0.10295	0.272015	0.457036	0	0.00957448	-0.111625	-0.344593	0.117357	0.282982	0.210114	0.374071	0	-0.021462	-0.0250702	0.0408392	0.263232	0.222223	0.270118	0.414742	0.073	0.046	0.009	0.083	0.057	0.07	0.96	0.98	0.99	1.14	1.22	1.24	0.98	1.2	1.23
P32861	UTP--glucose-1-phosphate uridylyltransferase OS=Saccharomyces cerevisiae (strain ATCC 204508 / S288c) GN=UGP1 PE=1 SV=1	UTP--glucose-1-phosphate uridylyltransferase	UGP1	0	-0.0727495	0.162862	-0.0191511	0.362262	0.190563	0.207138	-0.342385	0	0.0554888	0.19185	0.0807131	0.0952	0.619797	0.35515	0.487816	0	0.0238787	0.0331299	0.333981	0.338363	0.342988	0.355503	0.265256	0.085	0.069	0.012	0.008	0.092	0.034	1.02	1.06	1.01	1.15	1.41	1.25	1.03	1.27	1.23
P41940	Mannose-1-phosphate guanyltransferase OS=Saccharomyces cerevisiae (strain ATCC 204508 / S288c) GN=PSA1 PE=1 SV=2	Mannose-1-phosphate guanyltransferase	PSA1	0	0.215188	0.304623	0.113853	0.27005	0.358779	0.264656	0.906133	0	0.474161	0.209194	0.439261	0.13087	0.629608	0.473471	0.849167	0	0.164119	-0.152647	0.386512	0.45574	0.222392	0.249451	0.495325	0.106	0.166	0.11	0.046	0.132	0.107	1.13	1.18	1.01	1.24	1.58	1.26	1.11	1.36	1.23
Q12177	Uncharacterized protein YLL056C OS=Saccharomyces cerevisiae (strain ATCC 204508 / S288c) GN=YLL056C PE=2 SV=1	Uncharacterized protein YLL056C	YLL056C	0	-0.0125726	0.0909563	0.233526	0.266421	0.237513	0.504524	1.09022	0	0.0837591	0.123883	0.0459721	0.148405	0.389663	0.180467	0.536858	0	0.0589625	-0.0740911	0.312613	0.136096	0.259017	0.225582	0.167056	0.04	0.043	0.046	0.13	0.123	0.032	1.02	1.05	1	1.3	1.3	1.16	1.02	1.25	1.23
P04786	DNA topoisomerase 1 OS=Saccharomyces cerevisiae (strain ATCC 204508 / S288c) GN=TOP1 PE=1 SV=2	DNA topoisomerase 1	TOP1	0	0.172649	0.207183	0.844333	0.463769	0.440641	0.535474	-0.13531	0	0.0437694	-0.0444746	-0.120154	0.146841	0.566815	0.289624	0.169925	0	-0.0704808	-0.295822	0.281936	-0.0325628	0.0678957	-0.14135	0.135406	0.075	0.031	0.104	0.046	0.144	0.098	1.09	1	0.92	1.4	1.28	1.02	1.01	1.23	1.23
P42940	Probable electron transfer flavoprotein subunit beta OS=Saccharomyces cerevisiae (strain ATCC 204508 / S288c) GN=CIR1 PE=1 SV=1	Probable electron transfer flavoprotein subunit beta	CIR1	0	0.0402245	0.240072	1.01849	0.083416	0.36868	0.44268	-0.0421149	0	0.185414	-0.0936591	0.0644887	-0.0333586	0.330149	0.0853599	0.228269	0	0.434822	0.374635	0.325279	0.54815	0.669132	0.804956	0.355095	0.091	0.1	0.156	0.036	0.085	0.155	1.07	1.02	1.22	1.33	1.16	1.54	1.1	1.34	1.22
P47018	Maintenance of telomere capping protein 1 OS=Saccharomyces cerevisiae (strain ATCC 204508 / S288c) GN=MTC1 PE=1 SV=1	Maintenance of telomere capping protein 1	MTC1	0	-0.163252	-0.0519644	0.0012343	0.214196	0.157385	0.242306	-0.745221	0	-0.00350953	0.0911479	0.113319	0.202756	0.329876	0.32679	0.464989	0	-0.0282105	-0.0984767	0.0150961	0.212554	0.121011	0.182478	0.209575	0.057	0.038	0.035	0.042	0.056	0.031	0.95	1.02	0.97	1.15	1.3	1.13	0.98	1.19	1.21
P15705	Heat shock protein STI1 OS=Saccharomyces cerevisiae (strain ATCC 204508 / S288c) GN=STI1 PE=1 SV=1	Heat shock protein STI1	STI1	0	0.0194041	-0.0286582	0.117202	0.185658	0.00401272	0.102825	-1.42985	0	0.0425594	-0.0041951	0.0405696	0.134725	0.180539	0.644176	0.245898	0	0.00920533	-0.0803361	0.227921	0.178038	0.208533	0.617333	0.236086	0.017	0.018	0.034	0.048	0.181	0.165	1	1.01	0.98	1.04	1.29	1.29	1	1.21	1.21
P00937	Multifunctional tryptophan biosynthesis protein OS=Saccharomyces cerevisiae (strain ATCC 204508 / S288c) GN=TRP3 PE=1 SV=2	Multifunctional tryptophan biosynthesis protein	TRP3	0	0.0650601	0.0247426	0.248303	0.207718	0.183854	0.241282	-0.261134	0	0.00704491	0.193275	0.103163	0.337581	0.552312	0.561228	0.347923	0	-0.102084	0.00627715	0.0992561	0.0735811	0.0874628	-0.0753256	0.442558	0.023	0.078	0.042	0.028	0.082	0.188	1.02	1.05	0.98	1.16	1.4	1.12	1.02	1.23	1.21
P32773	Transcription initiation factor IIA large subunit OS=Saccharomyces cerevisiae (strain ATCC 204508 / S288c) GN=TOA1 PE=1 SV=1	Transcription initiation factor IIA large subunit	TOA1	0	0.185968	0.190806	0.0594082	0.472239	0.362162	0.423741	0.112222	0	-0.0344884	-0.424199	-0.273631	0.0323769	-0.0586431	0.100026	0.336951	0	0.0202996	-0.0641967	0.392596	0.195016	0.204551	0.237128	0.338191	0.074	0.155	0.03	0.03	0.139	0.049	1.09	0.91	0.99	1.31	1.1	1.2	1	1.2	1.21
P37292	Serine hydroxymethyltransferase, mitochondrial OS=Saccharomyces cerevisiae (strain ATCC 204508 / S288c) GN=SHM1 PE=1 SV=2	Serine hydroxymethyltransferase, mitochondrial	SHM1	0	-0.0135883	-0.0446706	0.161954	0.215297	0.123718	0.195786	0.311322	0	-0.0722779	0.152447	-0.0616178	0.183736	0.441712	0.115007	0.375363	0	0.0901234	-0.0432814	0.346908	0.242061	0.289204	0.235369	0.507837	0.016	0.08	0.048	0.035	0.116	0.102	0.99	1.02	1.01	1.12	1.25	1.27	1.01	1.21	1.2
P46680	Actin-interacting protein 1 OS=Saccharomyces cerevisiae (strain ATCC 204508 / S288c) GN=AIP1 PE=1 SV=1	Actin-interacting protein 1	AIP1	0	0.125635	0.173255	0.395291	0.338337	0.220695	0.349664	-0.631331	0	0.211046	0.24391	0.258412	0.358008	0.538927	0.422212	0.405205	0	0.0539984	0.0610756	0.465798	0.330395	0.38051	0.332461	0.349563	0.061	0.089	0.023	0.063	0.051	0.017	1.07	1.11	1.03	1.22	1.37	1.28	1.07	1.29	1.2
P00950	Phosphoglycerate mutase 1 OS=Saccharomyces cerevisiae (strain ATCC 204508 / S288c) GN=GPM1 PE=1 SV=3	Phosphoglycerate mutase 1	GPM1	0	-0.338466	-0.00874111	-0.24772	0.00352307	0.0318081	-0.0843797	0.446033	0	0.0748038	0.351017	0.243517	0.214353	0.805751	0.40094	0.444139	0	0.00952277	0.0527263	0.478681	0.252342	0.238725	0.234531	0.364838	0.128	0.132	0.02	0.057	0.16	0.052	0.93	1.11	1.01	0.98	1.48	1.21	1.02	1.22	1.2
Q12513	Translation machinery-associated protein 17 OS=Saccharomyces cerevisiae (strain ATCC 204508 / S288c) GN=TMA17 PE=1 SV=1	Translation machinery-associated protein 17	TMA17	0	0.131767	0.205513	0.406075	0.503103	0.396315	0.528711	-0.40715	0	0.0625816	0.0451321	-0.0268563	0.233184	0.314187	0.332458	0.227861	0	0.0999556	0.00858864	0.293021	0.227105	0.228971	0.205636	0.193432	0.071	0.022	0.039	0.065	0.038	0.013	1.08	1.03	1.03	1.38	1.22	1.16	1.04	1.25	1.2
P25349	Flavoprotein-like protein YCP4 OS=Saccharomyces cerevisiae (strain ATCC 204508 / S288c) GN=YCP4 PE=1 SV=1	Flavoprotein-like protein YCP4	YCP4	0	-0.42665	-0.0191831	-0.34036	0.199952	0.00260439	-0.0682875	-0.128721	0	0.0464807	0.235397	0.438998	0.224681	0.487097	0.429376	0.330139	0	-0.219966	-0.0104468	0.316505	0.0710831	0.133144	0.153876	0.399339	0.158	0.088	0.084	0.035	0.055	0.105	0.91	1.07	0.95	0.98	1.34	1.18	0.98	1.16	1.19
P38077	ATP synthase subunit gamma, mitochondrial OS=Saccharomyces cerevisiae (strain ATCC 204508 / S288c) GN=ATP3 PE=1 SV=1	ATP synthase subunit gamma, mitochondrial	ATP3	0	0.0388441	0.158317	0.483014	0.311202	0.358032	0.294101	0.036104	0	0.207395	0.0958727	0.310911	0.337772	0.399465	0.334968	0.448285	0	0.150825	0.173193	0.134824	0.366001	0.195219	0.326631	0.387543	0.058	0.072	0.064	0.031	0.039	0.067	1.05	1.07	1.08	1.25	1.31	1.24	1.07	1.27	1.19
P53912	Uncharacterized protein YNL134C OS=Saccharomyces cerevisiae (strain ATCC 204508 / S288c) GN=YNL134C PE=1 SV=1	Uncharacterized protein YNL134C	YNL134C	0	-0.00369351	0.0589446	0.436188	0.259702	0.16984	0.260977	-0.131905	0	-0.0225865	0.267238	0.12084	0.136997	0.542324	0.233143	0.179707	0	-0.143982	-0.219833	0.425645	0.0644721	0.199536	0.0167961	0.320872	0.025	0.115	0.078	0.045	0.14	0.105	1.01	1.06	0.92	1.16	1.25	1.14	1	1.18	1.19
Q99337	Transposon Ty1-NL2 Gag-Pol polyprotein OS=Saccharomyces cerevisiae (strain ATCC 204508 / S288c) GN=TY1B-NL2 PE=3 SV=1	Transposon Ty1-NL2 Gag-Pol polyprotein	TY1B-NL2	0	0.418992	0.243817	0.601921	0.589018	0.400649	0.463856	0.115852	0	0.364054	-0.0701389	0.384664	0.335887	0.594394	0.447849	0.562525	0	0.304074	-0.0345324	0.641616	0.372093	0.301862	-0.10765	0.320563	0.144	0.168	0.133	0.031	0.053	0.159	1.17	1.08	1.07	1.35	1.45	1.14	1.11	1.31	1.18
P39111	V-type proton ATPase subunit F OS=Saccharomyces cerevisiae (strain ATCC 204508 / S288c) GN=VMA7 PE=1 SV=1	V-type proton ATPase subunit F	VMA7	0	-0.0767373	-0.015577	0.0571793	0.307456	0.13061	0.0917987	-1.65117	0	-0.178512	0.192093	-0.282161	0.13824	0.285081	0.124119	0.032045	0	-0.215203	-0.16109	0.195301	0.237404	0.303233	0.0786367	0.520445	0.028	0.129	0.079	0.019	0.09	0.152	0.98	1.01	0.92	1.08	1.11	1.24	0.97	1.14	1.18
P17423	Homoserine kinase OS=Saccharomyces cerevisiae (strain ATCC 204508 / S288c) GN=THR1 PE=1 SV=4	Homoserine kinase	THR1	0	-0.0377883	0.145253	0.174924	0.415167	0.285876	0.288706	0.189836	0	0.038824	0.0725907	0.185849	0.205813	0.166079	0.240885	0.366229	0	-0.136642	0.00499233	0.0524921	0.130495	0.263006	0.191718	0.15083	0.068	0.025	0.055	0.001	0.071	0.04	1.03	1.03	0.97	1.22	1.2	1.15	1.01	1.19	1.18
Q00711	Succinate dehydrogenase [ubiquinone] flavoprotein subunit, mitochondrial OS=Saccharomyces cerevisiae (strain ATCC 204508 / S288c) GN=SDH1 PE=1 SV=1	Succinate dehydrogenase [ubiquinone] flavoprotein subunit, mitochondrial	SDH1	0	0.0553042	0.0855909	0.11392	0.411057	0.244118	0.29567	0.244118	0	0.12823	0.140314	-0.0787395	0.208856	0.527848	0.383943	0.502587	0	0.268061	0.109072	0.0591958	0.370938	0.0591958	0.223471	0.382573	0.03	0.053	0.094	0.025	0.053	0.112	1.03	1.07	1.09	1.21	1.39	1.17	1.06	1.25	1.18
P17505	Malate dehydrogenase, mitochondrial OS=Saccharomyces cerevisiae (strain ATCC 204508 / S288c) GN=MDH1 PE=1 SV=2	Malate dehydrogenase, mitochondrial	MDH1	0	0.0220174	0.0979117	0.254896	0.280662	0.162313	0.32851	0.0408438	0	0.0741706	0.0865394	0.180003	0.123022	0.335258	0.259281	0.350723	0	0.134409	0.105874	0.508882	0.305922	0.284607	0.374684	0.295608	0.036	0.032	0.048	0.081	0.034	0.034	1.03	1.04	1.06	1.19	1.24	1.25	1.04	1.23	1.18
Q03558	NADPH dehydrogenase 2 OS=Saccharomyces cerevisiae (strain ATCC 204508 / S288c) GN=OYE2 PE=1 SV=3	NADPH dehydrogenase 2	OYE2	0	-0.210488	0.0583103	-0.0550238	0.222674	0.0669888	0.06209	0.121618	0	0.188748	0.359106	0.727892	0.211336	0.489446	0.510416	0.573052	0	-0.0839361	0.0559786	0.0087102	0.37757	0.181463	0.319946	0.155029	0.096	0.124	0.049	0.002	0.03	0.062	0.97	1.14	0.99	1.05	1.44	1.17	1.03	1.22	1.18
C7GTE8	Signal transduction protein MDG1 OS=Saccharomyces cerevisiae (strain JAY291) GN=MDG1 PE=3 SV=1	Signal transduction protein MDG1	MDG1	0	0.118608	-0.0173695	0.68436	0.262574	0.124955	0.327305	-0.545789	0	0.189105	0.201107	0.574417	0.227579	0.483694	0.540922	0.427711	0	0.121222	0.104615	0.196288	0.240029	0.240029	0.191709	0.148482	0.052	0.076	0.045	0.099	0.039	0.032	1.02	1.1	1.05	1.17	1.4	1.14	1.06	1.24	1.17
Q12191	Binder of USO1 and GRH1 protein 1 OS=Saccharomyces cerevisiae (strain ATCC 204508 / S288c) GN=BUG1 PE=1 SV=1	Binder of USO1 and GRH1 protein 1	BUG1	0	0.0977971	-0.160374	0.247363	0.25252	0.0805018	0.481699	-1.42684	0	0.108891	0.229156	0.162877	0.204657	0.325088	0.326981	0.353843	0	-0.00270294	-0.00948254	0.226341	0.130305	0.195427	0.121644	0.101649	0.089	0.08	0.003	0.195	0.011	0.035	0.99	1.08	1	1.23	1.26	1.1	1.02	1.2	1.17
P14832	Peptidyl-prolyl cis-trans isomerase OS=Saccharomyces cerevisiae (strain ATCC 204508 / S288c) GN=CPR1 PE=1 SV=3	Peptidyl-prolyl cis-trans isomerase	CPR1	0	0.0547729	0.013244	0.117944	0.291264	0.173	0.131781	0.381631	0	0.230906	0.308765	0.485954	0.193895	0.741485	0.290177	0.550863	0	-0.0726712	-0.055515	0.16789	0.0759526	0.0316015	0.0892557	0.244177	0.02	0.108	0.026	0.02	0.155	0.077	1.02	1.14	0.97	1.11	1.45	1.09	1.04	1.22	1.17
Q05979	Kynureninase OS=Saccharomyces cerevisiae (strain ATCC 204508 / S288c) GN=BNA5 PE=1 SV=1	Kynureninase	BNA5	0	-0.00643856	0.0164255	0.208163	0.344511	0.234924	0.216086	-0.481394	0	0.0961196	0.0380642	0.0744456	0.116105	0.319998	0.321186	0.324744	0	-0.0885962	-0.149097	0.112945	0.196751	0.054025	0.0960854	0.112324	0.008	0.034	0.052	0.009	0.002	0.021	1	1.03	0.95	1.17	1.25	1.06	0.99	1.16	1.17
Q04341	Mitochondrial intermembrane space cysteine motif-containing protein MIX14 OS=Saccharomyces cerevisiae (strain ATCC 204508 / S288c) GN=MIX14 PE=4 SV=1	Mitochondrial intermembrane space cysteine motif-containing protein MIX14	MIX14	0	0.0209191	-0.0190901	0.141393	0.278868	0.240441	0.243707	0.469485	0	-0.011922	-0.0612243	0.0427961	0.114898	0.297278	0.150033	0.322044	0	0.110583	0.138328	0.38425	0.170933	0.219983	0.044669	0.411144	0.014	0.022	0.05	0.002	0.063	0.127	1	0.98	1.06	1.18	1.2	1.18	1.01	1.18	1.17
P23638	Proteasome subunit alpha type-3 OS=Saccharomyces cerevisiae (strain ATCC 204508 / S288c) GN=PRE9 PE=1 SV=1	Proteasome subunit alpha type-3	PRE9	0	-0.167627	-0.0356339	-0.0382327	0.156276	-0.0503309	0.217871	-1.85369	0	-0.126749	-0.0495161	-0.25012	0.076537	0.0813878	0.04189	0.210281	0	0.0114276	0.0409573	0.101306	0.193747	0.289638	0.234248	0.477261	0.06	0.044	0.015	0.131	0.062	0.09	0.96	0.96	1.01	1.06	1.08	1.26	0.98	1.14	1.16
P21182	S-adenosylmethionine decarboxylase proenzyme OS=Saccharomyces cerevisiae (strain ATCC 204508 / S288c) GN=SPE2 PE=1 SV=1	S-adenosylmethionine decarboxylase proenzyme	SPE2	0	0.100194	0.23224	-0.0451663	0.432227	0.0485802	0.349334	-0.265012	0	0.151622	0.266836	0.0921574	0.32573	0.626239	0.41694	0.343839	0	0.108221	-0.0104924	0.257798	0.12749	0.355	0.328187	0.0886922	0.081	0.092	0.046	0.147	0.104	0.099	1.08	1.1	1.02	1.15	1.38	1.2	1.07	1.25	1.16
P17649	4-aminobutyrate aminotransferase OS=Saccharomyces cerevisiae (strain ATCC 204508 / S288c) GN=UGA1 PE=1 SV=2	4-aminobutyrate aminotransferase	UGA1	0	0.00445449	0.0450193	0.117235	0.244136	0.0954776	0.16527	0.161286	0	0.0712864	0.079139	0.442917	0.0782686	0.416301	0.24228	0.328623	0	0.119765	-0.0862697	0.440882	0.170251	0.282008	0.215239	0.305973	0.017	0.03	0.072	0.034	0.06	0.032	1.01	1.04	1.01	1.09	1.26	1.2	1.02	1.19	1.16
P10963	Phosphoenolpyruvate carboxykinase (ATP) OS=Saccharomyces cerevisiae (strain ATCC 204508 / S288c) GN=PCK1 PE=1 SV=2	Phosphoenolpyruvate carboxykinase (ATP)	PCK1	0	-0.278672	0.0512988	0.000785311	0.15822	-0.0751669	-0.0350804	-0.920683	0	-0.037461	0.338283	0.335624	0.565858	0.761474	0.609385	0.444491	0	-0.0367902	0.125531	0.302448	0.299359	0.211457	0.16235	-0.130723	0.119	0.149	0.06	0.02	0.109	0.124	0.95	1.08	1.02	0.96	1.53	1.06	1.02	1.18	1.16
P06169	Pyruvate decarboxylase isozyme 1 OS=Saccharomyces cerevisiae (strain ATCC 204508 / S288c) GN=PDC1 PE=1 SV=7	Pyruvate decarboxylase isozyme 1	PDC1	0	-0.12682	-0.155522	0.137094	0.0364843	-0.0338516	-0.113317	-0.28915	0	0.18291	0.498765	0.575224	0.263866	0.764083	0.381226	0.379365	0	-0.0843706	-0.13655	0.508846	0.167022	0.173113	0.110398	0.438067	0.058	0.178	0.048	0.039	0.16	0.124	0.94	1.18	0.95	0.95	1.43	1.19	1.02	1.19	1.16
P32327	Pyruvate carboxylase 2 OS=Saccharomyces cerevisiae (strain ATCC 204508 / S288c) GN=PYC2 PE=1 SV=2	Pyruvate carboxylase 2	PYC2	0	0.166632	0.182126	0.26862	0.298653	0.192248	0.299945	-0.485824	0	0.0470826	0.00533402	0.179134	0.122653	0.247456	0.148903	0.238891	0	0.129421	0.05978	0.507763	0.329681	0.376459	0.321864	0.462903	0.069	0.018	0.045	0.053	0.037	0.05	1.09	1.01	1.05	1.19	1.16	1.31	1.05	1.22	1.16
P15496	Isopentenyl-diphosphate Delta-isomerase OS=Saccharomyces cerevisiae (strain ATCC 204508 / S288c) GN=IDI1 PE=1 SV=2	Isopentenyl-diphosphate Delta-isomerase	IDI1	0	0.0426864	0.0225678	0.0790282	0.182864	0.0300126	0.189528	-0.380788	0	-0.0981531	0.154132	0.580437	0.23369	0.478494	0.256565	0.471528	0	0.222773	0.297771	0.193394	0.662685	0.401667	0.439451	0.184637	0.015	0.089	0.105	0.078	0.085	0.093	1.02	1.02	1.13	1.08	1.32	1.27	1.05	1.23	1.16
P38910	10 kDa heat shock protein, mitochondrial OS=Saccharomyces cerevisiae (strain ATCC 204508 / S288c) GN=HSP10 PE=1 SV=1	10 kDa heat shock protein, mitochondrial	HSP10	0	0.0707693	-0.026302	0.177616	0.355695	0.164065	0.229892	0.156199	0	-0.0226548	-0.0037658	-0.130637	0.203895	0.185323	0.143336	0.25997	0	0.0237048	-0.0621688	0.177921	0.220659	0.235839	0.195269	0.303358	0.035	0.008	0.031	0.032	0.041	0.038	1.01	0.99	0.99	1.15	1.15	1.19	1	1.16	1.16
A6ZQX9	Histone H2A.Z-specific chaperone CHZ1 OS=Saccharomyces cerevisiae (strain YJM789) GN=CHZ1 PE=3 SV=2	Histone H2A.Z-specific chaperone CHZ1	CHZ1	0	0.0660465	-0.00204319	-0.226823	0.276548	0.0360919	0.186661	-0.771263	0	0.0787457	-0.200378	0.0109632	0.253776	0.0826788	0.375529	0.335229	0	-0.0941661	-0.127446	-0.104396	0.172455	0.183773	0.138845	0.193391	0.027	0.098	0.046	0.074	0.107	0.02	1.02	0.98	0.95	1.08	1.21	1.13	0.98	1.14	1.16
P36015	Synaptobrevin homolog YKT6 OS=Saccharomyces cerevisiae (strain ATCC 204508 / S288c) GN=YKT6 PE=1 SV=1	Synaptobrevin homolog YKT6	YKT6	0	0.0303579	-0.0514063	0.180394	0.242755	0.129828	0.193481	-0.421998	0	0.0218415	0.083299	0.00415762	0.15343	0.291857	0.175104	0.216645	0	0.0165254	-0.0500638	0.339966	0.159463	0.250147	0.227164	0.329562	0.029	0.03	0.024	0.031	0.041	0.038	1	1.02	0.99	1.12	1.17	1.21	1	1.17	1.16
Q04493	Prefoldin subunit 5 OS=Saccharomyces cerevisiae (strain ATCC 204508 / S288c) GN=GIM5 PE=1 SV=1	Prefoldin subunit 5	GIM5	0	0.0232074	-0.312213	0.196539	0.162105	0.155119	-0.236761	-0.402098	0	-0.029581	0.134597	-0.0963071	0.257701	0.517764	0.411706	0.297229	0	-0.295331	-0.0419012	-0.607158	-0.030608	0.233364	-0.0590084	0	0.125	0.062	0.107	0.191	0.076	0.11	0.94	1.03	0.93	0.98	1.33	1.05	0.97	1.12	1.16
P25719	Peptidyl-prolyl cis-trans isomerase C, mitochondrial OS=Saccharomyces cerevisiae (strain ATCC 204508 / S288c) GN=CPR3 PE=1 SV=1	Peptidyl-prolyl cis-trans isomerase C, mitochondrial	CPR3	0	-0.184546	-0.112667	-0.0794345	0.0995357	-0.194677	-0.136882	-0.900464	0	0.0641554	0.366019	0.278109	0.195089	0.539957	0.32939	0.284266	0	0.0315512	0.0144271	0.477118	0.221356	0.277461	0.418658	0.565009	0.065	0.14	0.011	0.028	0.097	0.1	0.93	1.11	1.01	0.89	1.31	1.34	1.02	1.18	1.16
P57744	Mitochondrial import inner membrane translocase subunit TIM8 OS=Saccharomyces cerevisiae (strain ATCC 204508 / S288c) GN=TIM8 PE=1 SV=1	Mitochondrial import inner membrane translocase subunit TIM8	TIM8	0	-0.0466317	0.0346001	0.167138	0.209266	0.085277	0.107303	-0.0444507	0	0.122704	0.181358	0.141438	0.155258	0.481978	0.319645	0.341157	0	-0.0102537	-0.0881229	0.321383	0.196174	0.239226	0.114219	0.284668	0.028	0.063	0.033	0.011	0.062	0.06	1	1.07	0.98	1.07	1.3	1.16	1.02	1.18	1.16
P25451	Proteasome subunit beta type-3 OS=Saccharomyces cerevisiae (strain ATCC 204508 / S288c) GN=PUP3 PE=1 SV=1	Proteasome subunit beta type-3	PUP3	0	0.399171	0.213701	0.356272	0.389191	0.369657	0.367117	-1.66762	0	0.217473	0.212366	0.254712	0.108439	0.237722	0.519898	0.199003	0	0.0233074	0.315334	0.469224	0.253605	0.489449	0.434873	0.337818	0.137	0.084	0.126	0.001	0.125	0.053	1.16	1.11	1.09	1.29	1.25	1.34	1.12	1.29	1.16
P22133	Malate dehydrogenase, cytoplasmic OS=Saccharomyces cerevisiae (strain ATCC 204508 / S288c) GN=MDH2 PE=1 SV=2	Malate dehydrogenase, cytoplasmic	MDH2	0	-0.177109	0.165317	0.27203	0.165317	0.0711137	0.135024	-0.499437	0	0.294886	0.366469	0.469973	0.242021	0.650079	0.542626	0.532034	0	0.163599	0.0467348	0.380158	0.333616	0.27786	0.390853	-0.0454132	0.118	0.13	0.059	0.031	0.046	0.151	1	1.17	1.05	1.07	1.49	1.16	1.07	1.24	1.16
P25043	Proteasome subunit beta type-2 OS=Saccharomyces cerevisiae (strain ATCC 204508 / S288c) GN=PUP1 PE=1 SV=1	Proteasome subunit beta type-2	PUP1	0	-0.0815382	0.176576	-0.0627675	0.212153	0.156852	0.237212	-0.805214	0	-0.239785	0.303119	-0.297978	0.11706	0.40351	0.0815821	0.273292	0	-0.124663	0.0189831	0.180291	-0.0367709	0.19372	0.201218	0.238139	0.093	0.19	0.053	0.039	0.111	0.017	1.03	1.03	0.98	1.15	1.2	1.16	1.01	1.17	1.16
P23724	Proteasome subunit beta type-6 OS=Saccharomyces cerevisiae (strain ATCC 204508 / S288c) GN=PRE7 PE=1 SV=1	Proteasome subunit beta type-6	PRE7	0	0.0177658	-0.0308468	0.158789	0.116382	-0.0406794	0.0454903	-2.26173	0	0.219661	0.231782	0.380265	0.383575	0.219661	0.418116	0.605968	0	0.0642068	-0.129961	0.367966	0.309565	0.25559	0.229827	0.421472	0.017	0.088	0.068	0.042	0.133	0.073	1	1.11	0.99	1	1.34	1.24	1.03	1.19	1.16
P38115	D-arabinose dehydrogenase [NAD(P)+] heavy chain OS=Saccharomyces cerevisiae (strain ATCC 204508 / S288c) GN=ARA1 PE=1 SV=1	D-arabinose dehydrogenase [NAD(P)+] heavy chain	ARA1	0	0.0265337	0.0445479	0.396633	0.1593	0.0942453	0.20709	0.0470056	0	0.00937979	0.200898	0.0550595	0.220844	0.354355	0.190019	0.25165	0	-0.147709	-0.198462	0.368972	0.049608	0.181145	0.0574387	0.329521	0.016	0.08	0.072	0.055	0.058	0.095	1.02	1.05	0.92	1.11	1.2	1.14	1	1.15	1.16
P38009	Bifunctional purine biosynthesis protein ADE17 OS=Saccharomyces cerevisiae (strain ATCC 204508 / S288c) GN=ADE17 PE=1 SV=2	Bifunctional purine biosynthesis protein ADE17	ADE17	0	-0.0309269	-0.0214171	0.160183	0.17676	0.0454546	0.0937047	-0.63792	0	0.102287	0.261395	0.22839	0.269841	0.343461	0.323636	0.33501	0	0.0331733	-0.0122482	0.315088	0.235107	0.328905	0.204476	0.422929	0.011	0.092	0.016	0.024	0.007	0.076	0.99	1.09	1	1.05	1.26	1.25	1.03	1.19	1.15
P34760	Peroxiredoxin TSA1 OS=Saccharomyces cerevisiae (strain ATCC 204508 / S288c) GN=TSA1 PE=1 SV=3	Peroxiredoxin TSA1	TSA1	0	-0.0911241	-0.112526	0.0416439	0.0554657	-0.0590042	-0.128379	-0.668799	0	0.122108	0.527635	0.454823	0.388582	0.426257	0.37317	0.399927	0	-0.148132	-0.209318	0.383399	0.116651	0.31462	0.0502763	0.607195	0.042	0.199	0.076	0.034	0.018	0.193	0.95	1.18	0.92	0.94	1.32	1.27	1.02	1.17	1.15
P39926	Protein SSO2 OS=Saccharomyces cerevisiae (strain ATCC 204508 / S288c) GN=SSO2 PE=1 SV=2	Protein SSO2	SSO2	0	0.0402639	0.031413	0.130061	0.420132	0.359542	0.146549	-0.746829	0	-0.117801	-0.00592136	-0.255121	0.0971137	0.269492	0.0366736	0.271591	0	0.00561725	0.00374726	0.14787	0.16303	0.108389	0.217291	0.129122	0.015	0.045	0.002	0.104	0.091	0.04	1.02	0.97	1	1.19	1.15	1.11	1	1.15	1.15
P32499	Nucleoporin NUP2 OS=Saccharomyces cerevisiae (strain ATCC 204508 / S288c) GN=NUP2 PE=1 SV=2	Nucleoporin NUP2	NUP2	0	-0.00523427	0.0481692	0.126238	0.302863	-0.00457895	0.313675	-0.0589889	0	-0.115356	-0.140059	-0.14731	0.127657	0.132988	0.0586019	0.503958	0	-0.0679699	-0.168266	0.00753096	0.177398	0.0519094	0.0947195	0.0372677	0.021	0.052	0.058	0.155	0.172	0.021	1.01	0.94	0.95	1.12	1.19	1.04	0.97	1.12	1.15
P53090	Aromatic/aminoadipate aminotransferase 1 OS=Saccharomyces cerevisiae (strain ATCC 204508 / S288c) GN=ARO8 PE=1 SV=1	Aromatic/aminoadipate aminotransferase 1	ARO8	0	0.115837	0.0789883	0.367722	0.313786	0.186827	0.193669	0.0600174	0	0.0532543	0.0742246	0.0115783	0.238733	0.327102	0.131834	0.203517	0	0.131306	0.118889	0.220366	0.317955	0.449117	0.281626	0.434393	0.041	0.026	0.05	0.003	0.069	0.063	1.05	1.03	1.06	1.14	1.17	1.31	1.05	1.21	1.15
P32582	Cystathionine beta-synthase OS=Saccharomyces cerevisiae (strain ATCC 204508 / S288c) GN=CYS4 PE=1 SV=1	Cystathionine beta-synthase	CYS4	0	-0.0957896	-0.0471733	0.231467	0.0603179	0.0317243	0.154244	-0.773376	0	0.0743277	0.317547	0.272135	0.253751	0.473654	0.379216	0.315595	0	0.269531	0.0554951	0.57158	0.237134	0.237134	0.336137	0.394347	0.033	0.118	0.101	0.06	0.055	0.055	0.97	1.1	1.08	1.07	1.31	1.25	1.05	1.21	1.15
O43137	Uncharacterized protein YBR085C-A OS=Saccharomyces cerevisiae (strain ATCC 204508 / S288c) GN=YBR085C-A PE=1 SV=1	Uncharacterized protein YBR085C-A	YBR085C-A	0	-0.0923609	0.148893	-0.20435	0.359322	0.194749	0.179625	-0.405833	0	-0.227478	-0.0638966	-0.545359	0.13329	0.0577698	-0.0388912	0.0133875	0	-0.00651331	0.0510742	-0.0403144	0.34363	0.358018	0.288672	0.384322	0.085	0.08	0.022	0.007	0.033	0.034	1.02	0.94	1.01	1.14	1.01	1.27	0.99	1.14	1.15
P18899	Stress protein DDR48 OS=Saccharomyces cerevisiae (strain ATCC 204508 / S288c) GN=DDR48 PE=1 SV=4	Stress protein DDR48	DDR48	0	0.130146	0.029355	0.308798	0.378469	0.144625	0.240712	-1.41229	0	0.258133	-0.000419449	0.047441	0.392637	0.365549	0.366526	0.236938	0	0.0786369	-0.0431691	0.222752	0.252529	0.21638	0.260294	0.278104	0.048	0.106	0.043	0.047	0.051	0.022	1.04	1.07	1.01	1.14	1.25	1.19	1.04	1.2	1.15
P32771	S-(hydroxymethyl)glutathione dehydrogenase OS=Saccharomyces cerevisiae (strain ATCC 204508 / S288c) GN=SFA1 PE=1 SV=1	S-(hydroxymethyl)glutathione dehydrogenase	SFA1	0	0.0369421	-0.0207378	0.210837	0.247041	0.03572	0.166539	0.0715995	0	-0.010839	-0.0255451	0.0164754	0.13955	0.19655	0.156353	0.243069	0	0.0519909	-0.150052	0.151622	0.303816	0.30553	0.210638	0.291411	0.02	0.009	0.072	0.064	0.03	0.035	1	0.99	0.98	1.07	1.15	1.21	0.99	1.14	1.15
P28319	Cell wall protein CWP1 OS=Saccharomyces cerevisiae (strain ATCC 204508 / S288c) GN=CWP1 PE=1 SV=2	Cell wall protein CWP1	CWP1	0	0.0786248	0.0258808	0.182571	0.213921	0.141172	0.203261	-0.159248	0	0.15899	-0.12949	0.026298	0.141051	0.164262	0.203844	0.573367	0	0.166713	-0.0417173	0.394108	0.232233	0.211226	0.225514	0.164373	0.028	0.101	0.078	0.03	0.163	0.022	1.02	1.01	1.03	1.13	1.25	1.15	1.02	1.18	1.15
P15019	Transaldolase OS=Saccharomyces cerevisiae (strain ATCC 204508 / S288c) GN=TAL1 PE=1 SV=4	Transaldolase	TAL1	0	-0.0720954	-0.0309641	0.147835	0.0568577	0.079462	0.0147596	0.00423247	0	0.162232	0.304943	0.482658	0.180564	0.56465	0.357007	0.544097	0	0.108277	0.137473	0.487958	0.258509	0.210439	0.247839	0.292515	0.025	0.105	0.05	0.032	0.077	0.029	0.98	1.12	1.06	1.03	1.41	1.19	1.05	1.21	1.15
P53278	Uncharacterized protein YGR130C OS=Saccharomyces cerevisiae (strain ATCC 204508 / S288c) GN=YGR130C PE=1 SV=1	Uncharacterized protein YGR130C	YGR130C	0	-0.000753234	0.0307946	-0.028007	0.279259	0.18238	0.192849	-0.590495	0	0.0210359	0.0112297	-0.048942	0.164755	0.265451	0.173018	0.338513	0	-0.0459947	-0.0312978	-0.0184971	0.183892	0.188553	0.159913	0.0986802	0.013	0.007	0.016	0.005	0.057	0.032	1.01	1.01	0.98	1.14	1.2	1.11	1	1.15	1.15
P32608	Retrograde regulation protein 2 OS=Saccharomyces cerevisiae (strain ATCC 204508 / S288c) GN=RTG2 PE=1 SV=2	Retrograde regulation protein 2	RTG2	0	0.274097	0.129312	0.254766	0.470495	0.312	0.260677	-0.78035	0	0.147537	-0.0647189	0.191026	0.232018	0.422212	0.354075	0.3552	0	0.239905	-0.0086303	0.30171	0.339602	0.258006	0.15229	0.147119	0.095	0.076	0.1	0.025	0.027	0.044	1.1	1.02	1.06	1.22	1.3	1.14	1.06	1.22	1.15
Q12074	Spermidine synthase OS=Saccharomyces cerevisiae (strain ATCC 204508 / S288c) GN=SPE3 PE=1 SV=1	Spermidine synthase	SPE3	0	0.0429592	0.199343	0.441384	0.363751	0.340421	0.296066	-1.56175	0	-0.000381312	0.263416	0.0041878	0.186436	0.377866	0.122032	0.128324	0	-0.0637951	-0.0561071	0.459586	-0.00170297	0.229749	0.178535	0.215161	0.074	0.108	0.024	0.022	0.104	0.018	1.06	1.07	0.97	1.25	1.16	1.16	1.03	1.19	1.15
P38821	Aspartyl aminopeptidase 4 OS=Saccharomyces cerevisiae (strain ATCC 204508 / S288c) GN=APE4 PE=1 SV=1	Aspartyl aminopeptidase 4	APE4	0	0.195153	0.0579038	0.334851	0.284365	0.15729	0.286036	-0.129001	0	0.0788071	-0.0551791	0.022959	0.202837	0.153903	0.309393	0.174921	0	0.345527	0.135142	0.285569	0.389121	0.478768	0.454507	0.330124	0.07	0.047	0.122	0.063	0.059	0.054	1.06	1.01	1.12	1.17	1.16	1.34	1.06	1.22	1.15
P40005	Prefoldin subunit 2 OS=Saccharomyces cerevisiae (strain ATCC 204508 / S288c) GN=GIM4 PE=1 SV=2	Prefoldin subunit 2	GIM4	0	-0.029068	-0.00737297	-0.0815596	0.137445	0.0644084	0.172481	-0.109574	0	-0.0100188	0.00421785	0.0190735	0.189377	0.181611	0.152886	0.211766	0	-0.0904335	-0.0982318	0.239509	0.293154	0.254895	0.0419941	0.355383	0.01	0.005	0.038	0.053	0.02	0.109	0.99	1	0.96	1.09	1.13	1.17	0.98	1.13	1.15
Q12032	Altered inheritance of mitochondria protein 41, mitochondrial OS=Saccharomyces cerevisiae (strain ATCC 204508 / S288c) GN=AIM41 PE=1 SV=1	Altered inheritance of mitochondria protein 41, mitochondrial	AIM41	0	0.181528	0.0229804	-0.15562	0.339539	0.180094	0.210617	0.518712	0	-0.0835213	-0.416564	-0.107972	0.0973171	-0.133178	0.175034	0.230693	0	-0.0341344	-0.0359019	-0.062476	0.214898	0.287519	0.228704	0.0922466	0.07	0.147	0.014	0.015	0.131	0.069	1.05	0.9	0.98	1.15	1.07	1.15	0.98	1.12	1.15
P14747	Serine/threonine-protein phosphatase 2B catalytic subunit A2 OS=Saccharomyces cerevisiae (strain ATCC 204508 / S288c) GN=CMP2 PE=1 SV=2	Serine/threonine-protein phosphatase 2B catalytic subunit A2	CMP2	0	-0.0190219	0.01491	0.172963	0.323751	0.177003	0.136674	-1.01572	0	-0.218856	-0.0195004	-0.046348	0.140964	0.316294	0.109457	0.135855	0	-0.223626	0.0990424	-0.275134	0.123504	0.228269	0.137984	0.0292943	0.012	0.082	0.112	0.02	0.08	0.069	1	0.95	0.98	1.11	1.14	1.1	0.97	1.12	1.15
P38345	Succinate dehydrogenase assembly factor 4, mitochondrial OS=Saccharomyces cerevisiae (strain ATCC 204508 / S288c) GN=SDH8 PE=1 SV=2	Succinate dehydrogenase assembly factor 4, mitochondrial	SDH8	0	-0.0191421	0.0850403	0.140108	0.374574	0.119022	0.325913	0.11816	0	-0.110577	0.0865468	-0.13347	0.287095	0.301846	0.296375	0.227612	0	-0.19192	-0.0689687	-0.230311	0.105367	0.0274871	0.025161	-0.0170211	0.039	0.068	0.067	0.101	0.028	0.017	1.02	1	0.94	1.17	1.21	1.01	0.98	1.13	1.15
P32190	Glycerol kinase OS=Saccharomyces cerevisiae (strain ATCC 204508 / S288c) GN=GUT1 PE=3 SV=1	Glycerol kinase	GUT1	0	0.180892	0.166412	0.246976	0.319443	0.155309	0.211682	0.118272	0	0.0633821	0.122752	0.159597	0.284773	0.253178	0.366267	0.47877	0	0.163302	-0.0419012	0.144993	0.428875	0.30286	0.0948292	0.365321	0.068	0.043	0.076	0.028	0.078	0.096	1.09	1.04	1.03	1.14	1.29	1.2	1.05	1.21	1.15
P53281	LAS seventeen-binding protein 1 OS=Saccharomyces cerevisiae (strain ATCC 204508 / S288c) GN=LSB1 PE=1 SV=1	LAS seventeen-binding protein 1	LSB1	0	-0.28315	-0.0818095	-0.243196	0.198414	0.0419259	0.0374273	-0.305834	0	-0.0775635	0.0934935	-0.288726	0.264058	0.219504	0.0827548	0.371809	0	-0.0852332	-0.0973349	-0.0411521	0.0392213	0.123569	0.166133	0.155974	0.099	0.06	0.037	0.002	0.1	0.015	0.92	1	0.96	1.03	1.17	1.11	0.96	1.1	1.15
A6ZXM9	ATPase GET3 OS=Saccharomyces cerevisiae (strain YJM789) GN=GET3 PE=3 SV=1	ATPase GET3	GET3	0	-0.0079979	0.120024	0.49695	0.63115	0.153505	0.482532	-0.869009	0	0.156776	0.185585	0.133618	0.181074	0.279656	0.20423	0.0937762	0	-0.0103081	0.0153253	0.393153	0.383999	0.19318	0.273623	0.206223	0.05	0.068	0.009	0.161	0.064	0.03	1.03	1.08	1	1.25	1.14	1.17	1.04	1.19	1.15
P38281	Actin patches distal protein 1 OS=Saccharomyces cerevisiae (strain ATCC 204508 / S288c) GN=APD1 PE=1 SV=1	Actin patches distal protein 1	APD1	0	0.125068	0.247196	0.107114	0.268122	0.311326	0.356535	-0.126289	0	-0.197132	-0.303702	-0.328805	-0.073529	0.156923	-0.0455147	-0.0776603	0	0.391817	0.319329	0.219828	0.279125	0.473362	0.556863	0.305885	0.086	0.108	0.139	0.022	0.09	0.087	1.09	0.89	1.19	1.26	1.01	1.37	1.06	1.21	1.15
P38523	GrpE protein homolog, mitochondrial OS=Saccharomyces cerevisiae (strain ATCC 204508 / S288c) GN=MGE1 PE=1 SV=1	GrpE protein homolog, mitochondrial	MGE1	0	-0.0276961	0.0786211	0.303788	0.26952	0.128467	0.263936	-0.108078	0	-0.0719613	0.102502	-0.0388599	0.111869	0.263419	0.155746	0.208218	0	0.00928096	0.0569322	0.173188	0.169925	0.242139	0.19711	0.259846	0.039	0.061	0.021	0.066	0.037	0.022	1.01	1.01	1.02	1.15	1.16	1.18	1.01	1.16	1.15
A6ZZR2	RNA polymerase II degradation factor 1 OS=Saccharomyces cerevisiae (strain YJM789) GN=DEF1 PE=3 SV=1	RNA polymerase II degradation factor 1	DEF1	0	-0.11003	0.017504	0.100948	0.181527	0.0898726	0.146406	-1.18688	0	0.020605	0.0527586	-0.0250455	0.142783	0.284005	0.203582	0.176293	0	-0.210064	-0.0544478	0.0398453	0.12158	0.160968	0.0726424	0.224625	0.047	0.018	0.074	0.028	0.039	0.053	0.98	1.02	0.94	1.09	1.17	1.11	0.98	1.12	1.14
P05373	Delta-aminolevulinic acid dehydratase OS=Saccharomyces cerevisiae (strain ATCC 204508 / S288c) GN=HEM2 PE=1 SV=2	Delta-aminolevulinic acid dehydratase	HEM2	0	0.111672	-0.0247994	0.217473	0.296341	0.123632	0.193385	-0.542453	0	-0.0112432	-0.0613563	0.0637319	0.112106	0.403666	0.10455	0.304103	0	0.113963	-0.0899771	0.36744	0.273873	0.191647	0.16723	0.131505	0.051	0.023	0.071	0.034	0.104	0.021	1.02	0.98	1.01	1.12	1.21	1.12	1	1.15	1.14
P19414	Aconitate hydratase, mitochondrial OS=Saccharomyces cerevisiae (strain ATCC 204508 / S288c) GN=ACO1 PE=1 SV=2	Aconitate hydratase, mitochondrial	ACO1	0	0.0806478	0.150672	0.217097	0.393624	0.149173	0.22263	-0.0755332	0	0.125544	0.0687128	0.0834654	0.179666	0.410987	0.33581	0.411932	0	0.0503395	0.0493951	0.253766	0.348028	0.254176	0.20422	0.0688196	0.052	0.043	0.02	0.036	0.03	0.066	1.06	1.05	1.02	1.14	1.31	1.13	1.04	1.19	1.14
P38795	Glutamine-dependent NAD(+) synthetase OS=Saccharomyces cerevisiae (strain ATCC 204508 / S288c) GN=QNS1 PE=1 SV=1	Glutamine-dependent NAD(+) synthetase	QNS1	0	0.0397254	0.0288755	0.26448	0.141129	0.0494882	0.124344	-1.48244	0	0.0557315	0.153023	-0.0597924	0.126308	0.373054	0.142238	0.146719	0	-0.0282109	-0.0500514	0.161567	0.25359	0.351087	0.22815	0.405287	0.014	0.054	0.017	0.037	0.094	0.062	1.02	1.05	0.98	1.06	1.17	1.26	1.02	1.16	1.14
P17709	Glucokinase-1 OS=Saccharomyces cerevisiae (strain ATCC 204508 / S288c) GN=GLK1 PE=1 SV=1	Glucokinase-1	GLK1	0	-0.16262	0.159308	0.0145728	0	-0.212661	-0.25573	-0.503111	0	0.239809	-0.126062	0.305874	0.206451	0.610904	0.519238	0.741631	0	0.145541	-0.0326047	0.18152	-0.0829363	0.297544	0.0630787	0.0707731	0.111	0.131	0.067	0.021	0.078	0.095	1	1.03	1.03	0.85	1.54	1.11	1.02	1.17	1.14
P41277	Glycerol-1-phosphate phosphohydrolase 1 OS=Saccharomyces cerevisiae (strain ATCC 204508 / S288c) GN=GPP1 PE=1 SV=3	Glycerol-1-phosphate phosphohydrolase 1	GPP1	0	-0.139376	0.117635	0.0774115	0.37772	0.159701	0.144546	-0.0316881	0	0.199812	0.309227	0.442084	0.21404	0.490813	0.474358	0.481433	0	-0.0604115	0.0925404	-0.210307	-0.103768	0.23082	-0.0392124	0.0925404	0.089	0.107	0.054	0.007	0.006	0.094	1	1.13	1.01	1.11	1.4	1.07	1.05	1.19	1.14
P32454	Aminopeptidase 2, mitochondrial OS=Saccharomyces cerevisiae (strain ATCC 204508 / S288c) GN=APE2 PE=1 SV=4	Aminopeptidase 2, mitochondrial	APE2	0	-0.00996148	0.0127527	0.323304	0.427023	0.088646	0.247689	-0.0397167	0	0.0114	0.0694998	0.211214	0.342099	0.260422	0.252049	0.124964	0	-0.018128	-0.0642817	0.352653	0.308238	0.183705	0.229904	0.151883	0.008	0.026	0.023	0.078	0.052	0.027	1	1.02	0.98	1.13	1.16	1.14	1	1.14	1.14
P21306	ATP synthase subunit epsilon, mitochondrial OS=Saccharomyces cerevisiae (strain ATCC 204508 / S288c) GN=ATP15 PE=1 SV=2	ATP synthase subunit epsilon, mitochondrial	ATP15	0	-0.00486029	0.192746	0.0240588	0.137945	0.233899	0.263843	0.073313	0	-0.0331454	0.0942339	0.492858	0.149786	0.414345	0.144785	0.206482	0	-0.0750582	0.0153698	0.11718	0.110516	0.108129	0.0718357	0.193932	0.08	0.046	0.033	0.015	0.1	0.044	1.05	1.01	0.99	1.19	1.2	1.09	1.02	1.16	1.14
P01120	Ras-like protein 2 OS=Saccharomyces cerevisiae (strain ATCC 204508 / S288c) GN=RAS2 PE=1 SV=4	Ras-like protein 2	RAS2	0	0.0647951	-0.0519011	0.0319305	0.11273	0.0101599	0.162163	-0.257946	0	0.134374	-0.110573	0.0419605	0.188545	0.338535	0.347572	0.303138	0	0.134083	0.172283	0.376122	0.307808	0.262217	0.248529	0.274426	0.041	0.085	0.062	0.074	0.016	0.009	1	1.01	1.07	1.06	1.26	1.2	1.03	1.17	1.14
P16649	General transcriptional corepressor TUP1 OS=Saccharomyces cerevisiae (strain ATCC 204508 / S288c) GN=TUP1 PE=1 SV=2	General transcriptional corepressor TUP1	TUP1	0	0.143389	0.0772158	0.363081	0.307503	0.211489	0.28004	-0.10065	0	0.141138	0.0696802	0.0802231	0.21091	0.304593	0.202026	0.287397	0	0.0242665	-0.109252	0.276703	0.203536	0.183582	0.156971	0.183854	0.05	0.049	0.049	0.034	0.038	0.011	1.05	1.05	0.98	1.19	1.2	1.13	1.03	1.17	1.14
C8ZEW0	Stationary phase protein 4 OS=Saccharomyces cerevisiae (strain Lalvin EC1118 / Prise de mousse) GN=SPG4 PE=3 SV=1	Stationary phase protein 4	SPG4	0	0.0286993	0.0513797	0.109423	0.326681	0.0916006	0.265084	0.0149821	0	-0.141027	0.027526	-0.118713	0.129374	0.255316	0.245569	0.105043	0	-0.0755213	-0.0343061	0.120626	0.14081	0.0954618	0.187425	0.124086	0.018	0.062	0.026	0.085	0.057	0.033	1.02	0.98	0.98	1.13	1.15	1.1	0.99	1.13	1.14
A6ZRK4	Cysteine proteinase 1, mitochondrial OS=Saccharomyces cerevisiae (strain YJM789) GN=LAP3 PE=3 SV=2	Cysteine proteinase 1, mitochondrial	LAP3	0	0.0672421	-0.0115182	0.195267	0.224463	0.0950697	0.12535	-0.0883695	0	0.196734	0.187332	0.360032	0.220435	0.400261	0.216974	0.326378	0	0.0238505	-0.0686676	0.429075	0.177945	0.282785	0.256506	0.269801	0.03	0.075	0.033	0.015	0.063	0.009	1.01	1.09	0.99	1.08	1.25	1.21	1.03	1.18	1.14
P22141	Proteasome subunit beta type-4 OS=Saccharomyces cerevisiae (strain ATCC 204508 / S288c) GN=PRE1 PE=1 SV=2	Proteasome subunit beta type-4	PRE1	0	-0.228769	-0.0138517	-0.23937	0.264271	0.113151	0.0713737	-2.55194	0	-0.23646	0.0601354	-0.423532	0.139812	0.0749531	-0.0400774	0.100853	0	-0.287313	-0.0806114	-0.277553	0.100729	0.237918	0.178064	0.0984241	0.087	0.106	0.101	0.02	0.051	0.048	0.95	0.96	0.92	1.07	1.03	1.13	0.94	1.08	1.14
P10964	DNA-directed RNA polymerase I subunit RPA190 OS=Saccharomyces cerevisiae (strain ATCC 204508 / S288c) GN=RPA190 PE=1 SV=2	DNA-directed RNA polymerase I subunit RPA190	RPA190	0	-0.0185849	-0.00379283	0.226108	0.235388	0.0634508	0.24301	-0.585199	0	0.0563446	0.14609	-0.0219069	0.335222	0.544542	0.484761	0.127729	0	0.20578	0.0150022	0.447962	0.40874	0.170483	0.0372169	0.183821	0.007	0.051	0.081	0.088	0.149	0.055	0.99	1.05	1.05	1.11	1.32	1.1	1.03	1.18	1.14
P41816	NADPH dehydrogenase 3 OS=Saccharomyces cerevisiae (strain ATCC 204508 / S288c) GN=OYE3 PE=1 SV=2	NADPH dehydrogenase 3	OYE3	0	0.253361	0.138619	0.529571	0.194835	0.31666	0.38403	0.127429	0	0.00813361	-0.17254	0.165955	0.111786	0.18805	0.190285	0.289136	0	0.305755	0.0700139	0.575471	0.22104	0.176393	0.206766	0.223068	0.087	0.069	0.114	0.033	0.04	0.016	1.1	0.96	1.1	1.28	1.17	1.15	1.05	1.2	1.14
P53163	54S ribosomal protein L12, mitochondrial OS=Saccharomyces cerevisiae (strain ATCC 204508 / S288c) GN=MNP1 PE=1 SV=1	54S ribosomal protein L12, mitochondrial	MNP1	0	0.166422	0.16612	0.321589	0.379475	0.182025	0.325648	-0.115929	0	0.106101	0.0658625	0.105219	0.155511	0.314697	0.230235	0.286181	0	0.0381877	0.0385802	0.133871	0.344724	0.280464	0.195715	0.192192	0.065	0.037	0.015	0.07	0.03	0.035	1.08	1.04	1.02	1.19	1.21	1.17	1.05	1.19	1.14
P40302	Proteasome subunit alpha type-6 OS=Saccharomyces cerevisiae (strain ATCC 204508 / S288c) GN=PRE5 PE=1 SV=1	Proteasome subunit alpha type-6	PRE5	0	-0.105759	0.0548825	0.0268923	0.204199	0.074349	0.140901	-1.89225	0	-0.128069	-0.0349717	-0.284756	0.110638	0.191497	0.0911736	0.18423	0	-0.0892368	-0.0100888	0.0911332	0.0998708	0.167929	0.19954	0.207958	0.056	0.045	0.034	0.033	0.038	0.015	0.99	0.96	0.98	1.08	1.11	1.14	0.98	1.11	1.14
Q08971	Protein PBDC1 homolog OS=Saccharomyces cerevisiae (strain ATCC 204508 / S288c) GN=YPL225W PE=1 SV=1	Protein PBDC1 homolog	YPL225W	0	-0.0593887	0.0142329	0.0455764	0.247966	0.201708	0.106742	0.463371	0	-0.111963	-0.0281707	-0.018551	0.0724991	0.194838	0.0876973	0.215687	0	0.0819416	0.0985361	0.170936	0.286047	0.23192	0.28143	0.192645	0.027	0.04	0.036	0.047	0.047	0.031	0.99	0.97	1.04	1.11	1.12	1.18	1	1.14	1.14
P08067	Cytochrome b-c1 complex subunit Rieske, mitochondrial OS=Saccharomyces cerevisiae (strain ATCC 204508 / S288c) GN=RIP1 PE=1 SV=1	Cytochrome b-c1 complex subunit Rieske, mitochondrial	RIP1	0	0.0654338	0.0616903	0.244882	0.356375	0.223448	0.326528	-0.717108	0	-0.227207	0.0121262	-0.337069	-0.0865018	0.159419	0.0870481	0.106824	0	-0.0769809	-0.189429	0.0250751	0.0796233	0.00962564	-0.0625007	0.167009	0.025	0.091	0.066	0.051	0.026	0.082	1.03	0.95	0.94	1.21	1.09	1.03	0.98	1.11	1.14
P43598	Inhibitor of glycogen debranching 1 OS=Saccharomyces cerevisiae (strain ATCC 204508 / S288c) GN=IGD1 PE=1 SV=1	Inhibitor of glycogen debranching 1	IGD1	0	0.181678	0.269287	0.252816	0.676309	0.275512	0.382483	-0.00188096	0	0.0494349	0.0767378	-0.0954132	0.54024	0.281432	0.184365	0.146212	0	0.335976	0.255486	0.355967	0.807758	0.519505	0.510615	0.19388	0.094	0.027	0.118	0.052	0.049	0.123	1.11	1.03	1.15	1.26	1.15	1.33	1.1	1.25	1.14
P53095	D-serine dehydratase OS=Saccharomyces cerevisiae (strain ATCC 204508 / S288c) GN=DSD1 PE=1 SV=2	D-serine dehydratase	DSD1	0	-0.00403551	-0.0305451	-0.0121406	0.323539	0.104899	0.0219958	-0.289059	0	0.221406	-0.170788	-0.0372931	0.457548	0.2565	0.199531	0.340674	0	0.135515	-0.0832339	0.0494196	0.441033	0.302563	0.313158	0.115477	0.011	0.137	0.077	0.041	0.049	0.075	0.99	1.02	1.01	1.05	1.2	1.19	1.01	1.14	1.14
P01094	Protease A inhibitor 3 OS=Saccharomyces cerevisiae (strain ATCC 204508 / S288c) GN=PAI3 PE=1 SV=1	Protease A inhibitor 3	PAI3	0	-0.0927874	-0.0503817	0.0397024	0.291006	0.087747	0.137174	0.088315	0	-0.200003	0.00881211	-0.335336	0.210302	0.213174	0.25565	0.112101	0	-0.242617	-0.133154	0.0326013	0.0858221	0.0389368	-0.0650935	0.0465997	0.032	0.08	0.084	0.024	0.051	0.043	0.97	0.96	0.92	1.08	1.14	1.01	0.95	1.08	1.14
P04147	Polyadenylate-binding protein, cytoplasmic and nuclear OS=Saccharomyces cerevisiae (strain ATCC 204508 / S288c) GN=PAB1 PE=1 SV=4	Polyadenylate-binding protein, cytoplasmic and nuclear	PAB1	0	-0.0427045	0.0456427	-0.00645502	0.404371	0.159199	0.165721	-0.0944841	0	-0.0214941	0.0673108	-0.0956488	0.141586	0.373135	0.346852	0.293746	0	-0.151154	0.0525638	-0.358143	0.209028	0.0381782	-0.0277057	0.0421158	0.031	0.032	0.072	0.003	0.028	0.027	1	1.01	0.98	1.12	1.26	1.01	1	1.13	1.14
Q04178	Hypoxanthine-guanine phosphoribosyltransferase OS=Saccharomyces cerevisiae (strain ATCC 204508 / S288c) GN=HPT1 PE=1 SV=1	Hypoxanthine-guanine phosphoribosyltransferase	HPT1	0	0.00133686	0.179011	0.177238	0.208248	0.179798	0.190386	-0.0226918	0	-0.132063	-0.0324767	-0.133015	0.0586784	0.223855	0.0321013	0.136067	0	-0.0128324	-0.10116	0.362716	0.121721	0.205737	0.155512	0.24859	0.073	0.047	0.038	0.005	0.066	0.032	1.04	0.96	0.97	1.14	1.1	1.15	0.99	1.13	1.14
P41338	Acetyl-CoA acetyltransferase OS=Saccharomyces cerevisiae (strain ATCC 204508 / S288c) GN=ERG10 PE=1 SV=3	Acetyl-CoA acetyltransferase	ERG10	0	-0.0608962	-0.0777279	0.0915699	0.192494	-0.0296633	0.0717388	-0.0903475	0	-0.0500984	0.186364	0.054203	0.170135	0.371924	0.167657	0.119278	0	-0.125635	-0.0692674	0.491898	0.168685	0.167731	0.0472596	0.455866	0.029	0.088	0.044	0.05	0.095	0.149	0.97	1.03	0.96	1.02	1.17	1.18	0.99	1.12	1.13
P38328	Actin-related protein 2/3 complex subunit 1 OS=Saccharomyces cerevisiae (strain ATCC 204508 / S288c) GN=ARC40 PE=1 SV=1	Actin-related protein 2/3 complex subunit 1	ARC40	0	-0.073632	0.151127	0.289347	0.209832	0.11763	0.169925	-0.770621	0	0.176741	0.343524	0.557906	0.164132	0.640636	0.588112	0.263034	0	0.172334	0.184316	0.317583	0.312132	0.256466	0.156606	0.197383	0.08	0.119	0.07	0.026	0.136	0.035	1.02	1.13	1.09	1.1	1.42	1.15	1.08	1.23	1.13
P38624	Proteasome subunit beta type-1 OS=Saccharomyces cerevisiae (strain ATCC 204508 / S288c) GN=PRE3 PE=1 SV=2	Proteasome subunit beta type-1	PRE3	0	-0.135259	-0.0373976	-0.0434239	0.226238	0.0201725	0.0875318	-0.620857	0	-0.100733	0.179297	-0.175865	0.127097	0.114691	0.0880158	0.282054	0	-0.102084	-0.127057	-0.0253853	0.0300897	0.0943539	0.175506	0.38511	0.048	0.099	0.047	0.033	0.074	0.106	0.96	1.02	0.95	1.04	1.12	1.17	0.98	1.11	1.13
P15891	Actin-binding protein OS=Saccharomyces cerevisiae (strain ATCC 204508 / S288c) GN=ABP1 PE=1 SV=4	Actin-binding protein	ABP1	0	0.0569432	0.0724739	0.406893	0.217956	0.0762139	0.269909	-0.893296	0	0.2493	0.00743659	0.390363	0.182709	0.357279	0.443415	0.325651	0	0.0640839	-0.0435539	0.0935896	0.182041	0.206109	0.137911	0.0140192	0.026	0.101	0.038	0.095	0.043	0.067	1.03	1.06	1.01	1.13	1.3	1.09	1.03	1.17	1.13
P38234	Protein RFS1 OS=Saccharomyces cerevisiae (strain ATCC 204508 / S288c) GN=RFS1 PE=1 SV=1	Protein RFS1	RFS1	0	-0.10736	0.00921853	-0.1249	0.199421	0.11441	0.172492	-0.0475947	0	-0.167968	0.231115	-0.307874	0.114052	0.40575	0.0590646	0.0444085	0	-0.26972	-0.148517	0.0310783	0.153887	0.0120326	0.136405	0.10933	0.044	0.14	0.094	0.028	0.147	0.045	0.98	1.02	0.91	1.1	1.13	1.06	0.97	1.1	1.13
C7GQJ1	Cell wall protein ECM33 OS=Saccharomyces cerevisiae (strain JAY291) GN=ECM33 PE=3 SV=1	Cell wall protein ECM33	ECM33	0	-0.0371112	-0.17248	0.160328	0.0888989	-0.0342381	0.0236301	-0.637875	0	0.0122839	0.157807	0.161751	0.113086	0.45158	0.162932	0.163326	0	-0.0732252	-0.132709	0.396884	0.0975016	0.175842	0.13755	0.265235	0.062	0.062	0.046	0.028	0.119	0.046	0.95	1.04	0.95	1	1.2	1.14	0.98	1.11	1.13
Q08412	Ubiquitin-binding protein CUE5 OS=Saccharomyces cerevisiae (strain ATCC 204508 / S288c) GN=CUE5 PE=1 SV=1	Ubiquitin-binding protein CUE5	CUE5	0	-0.463691	-0.180325	-0.564385	-0.0174271	-0.173332	0.00555715	-1.6156	0	-0.24761	-0.0140503	-0.427377	0.0444326	0.128229	0.0881356	0.128229	0	-0.216242	-0.173905	-0.158007	0.0569291	0.162301	0.0110183	0.0923747	0.159	0.094	0.081	0.088	0.016	0.052	0.87	0.94	0.92	0.95	1.08	1.06	0.91	1.03	1.13
P00331	Alcohol dehydrogenase 2 OS=Saccharomyces cerevisiae (strain ATCC 204508 / S288c) GN=ADH2 PE=1 SV=3	Alcohol dehydrogenase 2	ADH2	0	-0.020441	-0.0627997	0.0703826	0.238337	0.0349009	0.086347	-0.0575277	0	0.054264	0.00477743	0.131853	0.201274	0.181719	0.150975	0.156498	0	0.00143186	-0.0972794	0.342825	0.222338	0.305987	0.160364	0.340338	0.022	0.021	0.039	0.025	0.011	0.065	0.98	1.01	0.98	1.04	1.12	1.21	0.99	1.12	1.13
P43582	WW domain-containing protein WWM1 OS=Saccharomyces cerevisiae (strain ATCC 204508 / S288c) GN=WWM1 PE=1 SV=1	WW domain-containing protein WWM1	WWM1	0	0.065257	0.044669	0.220169	0.383588	0.186963	0.281175	0.103161	0	0.0255351	-0.117523	0.0903465	0.222392	0.224494	0.203872	0.163367	0	-0.0125635	-0.0653944	0.251872	0.208025	0.101943	0.0731664	0.0784414	0.023	0.052	0.024	0.046	0.021	0.011	1.03	0.98	0.98	1.18	1.15	1.06	1	1.13	1.13
P48606	Tubulin-specific chaperone A OS=Saccharomyces cerevisiae (strain ATCC 204508 / S288c) GN=RBL2 PE=1 SV=1	Tubulin-specific chaperone A	RBL2	0	0.0434563	0.0357626	0.264329	0.345076	0.137264	0.305099	0.161282	0	0.0646274	-0.0310087	-0.075719	0.145266	0.15394	0.0936671	0.262546	0	0.00637993	-0.0854661	0.231557	0.16083	0.192558	0.124059	0.143317	0.016	0.034	0.035	0.082	0.06	0.025	1.02	1.01	0.98	1.17	1.13	1.11	1	1.14	1.13
P41921	Glutathione reductase OS=Saccharomyces cerevisiae (strain ATCC 204508 / S288c) GN=GLR1 PE=1 SV=2	Glutathione reductase	GLR1	0	-0.0583942	-0.133829	0.116315	0.165133	-0.0332176	0.113925	0.0936373	0	-0.0318327	0.105647	0.148825	0.115487	0.303595	0.172011	0.154307	0	-0.070931	-0.155389	0.135148	0.102227	0.139186	0.0916938	0.260975	0.046	0.05	0.054	0.072	0.057	0.061	0.96	1.02	0.95	1.03	1.16	1.12	0.98	1.1	1.13
P39522	Dihydroxy-acid dehydratase, mitochondrial OS=Saccharomyces cerevisiae (strain ATCC 204508 / S288c) GN=ILV3 PE=1 SV=2	Dihydroxy-acid dehydratase, mitochondrial	ILV3	0	0.00460549	0.0756142	0.319699	0.274465	0.125043	0.205303	-0.0643042	0	0.0346855	0.168313	0.074372	0.150397	0.409215	0.17459	0.12941	0	-0.0189229	-0.159276	0.391653	0.115337	0.0918202	0.0916305	0.297259	0.03	0.062	0.059	0.039	0.107	0.084	1.02	1.05	0.96	1.12	1.18	1.12	1.01	1.14	1.13
O74700	Mitochondrial import inner membrane translocase subunit TIM9 OS=Saccharomyces cerevisiae (strain ATCC 204508 / S288c) GN=TIM9 PE=1 SV=1	Mitochondrial import inner membrane translocase subunit TIM9	TIM9	0	0.049502	0.072222	0.145025	0.393023	0.0862425	0.0205893	-0.488986	0	-0.134902	0.0793814	0.0605703	0.213528	0.243654	0.159637	0.201573	0	-0.0796467	0.0216391	0.283738	0.284081	0.255865	0.234778	0.327002	0.025	0.074	0.037	0.032	0.029	0.034	1.03	0.99	0.99	1.04	1.15	1.21	1	1.13	1.13
P30657	Proteasome subunit beta type-7 OS=Saccharomyces cerevisiae (strain ATCC 204508 / S288c) GN=PRE4 PE=1 SV=1	Proteasome subunit beta type-7	PRE4	0	-0.2327	-0.089357	-0.113942	0.177688	0.0294571	0.106332	-1.75232	0	-0.31691	0.115604	-0.291068	0.119666	0.0909905	0.143051	0.0500751	0	-0.0729689	-0.00955617	0.0563141	0.0689212	0.0803596	0.152955	0.293296	0.081	0.15	0.027	0.038	0.032	0.076	0.93	0.96	0.98	1.05	1.07	1.13	0.96	1.08	1.13
P26783	40S ribosomal protein S5 OS=Saccharomyces cerevisiae (strain ATCC 204508 / S288c) GN=RPS5 PE=1 SV=3	40S ribosomal protein S5	RPS5	0	0.179161	0.0984037	0.117406	0.247578	0.124362	0.063344	-1.19697	0	0.087125	0.132506	0.132797	0.203214	0.462618	0.362074	0.264124	0	0.00900749	-0.0999991	0.293902	0.268546	0.253854	0.144081	0.195162	0.062	0.046	0.041	0.03	0.069	0.038	1.07	1.05	0.98	1.07	1.29	1.15	1.03	1.17	1.13
Q06146	Uncharacterized protein YLR257W OS=Saccharomyces cerevisiae (strain ATCC 204508 / S288c) GN=YLR257W PE=1 SV=1	Uncharacterized protein YLR257W	YLR257W	0	0.0216191	0.00629688	0.0998749	0.303448	0.0341982	0.241431	-1.09878	0	-0.024787	0.00204649	-0.184432	0.159843	0.116035	0.135956	0.193846	0	-0.0992313	0.0597458	0.0833202	0.173236	0.171345	0.262768	0.239491	0.008	0.01	0.055	0.101	0.028	0.033	1.01	0.99	0.99	1.1	1.11	1.17	1	1.13	1.13
P40303	Proteasome subunit alpha type-4 OS=Saccharomyces cerevisiae (strain ATCC 204508 / S288c) GN=PRE6 PE=1 SV=1	Proteasome subunit alpha type-4	PRE6	0	-0.00798877	0.214924	0.0720438	0.270619	0.174424	0.255531	-1.13663	0	-0.108046	0.147974	-0.202624	0.0758834	0.279018	0.0921511	0.218281	0	-0.202408	-0.332805	0.330571	-0.0186961	0	-0.0697703	0.160953	0.09	0.09	0.117	0.04	0.065	0.083	1.05	1.01	0.89	1.16	1.15	1.02	0.98	1.11	1.13
Q04603	DNA polymerase epsilon subunit D OS=Saccharomyces cerevisiae (strain ATCC 204508 / S288c) GN=DPB4 PE=1 SV=1	DNA polymerase epsilon subunit D	DPB4	0	0.056034	0.0615196	0.146565	0.469009	0.307573	0.300631	-0.566512	0	0	-0.0811818	-0.220126	0.186166	0.186166	0.00814317	0.122579	0	0.304855	-0.00680518	-0.207757	0.0565835	0.321249	0.20826	0.154377	0.023	0.032	0.127	0.003	0.062	0.06	1.03	0.98	1.08	1.23	1.08	1.17	1.03	1.16	1.13
P38061	60S ribosomal protein L32 OS=Saccharomyces cerevisiae (strain ATCC 204508 / S288c) GN=RPL32 PE=1 SV=1	60S ribosomal protein L32	RPL32	0	0.116509	0.0403049	0.1364	0.295763	-0.016701	0.198938	-0.471698	0	0.369983	0.313412	0.459796	0.413635	0.558011	0.362837	0.273212	0	0.127182	-0.0128865	0.47724	0.281959	0.31421	0.283876	0.428677	0.041	0.133	0.054	0.105	0.103	0.054	1.04	1.18	1.03	1.07	1.32	1.27	1.08	1.22	1.13
P38934	Nuclear segregation protein BFR1 OS=Saccharomyces cerevisiae (strain ATCC 204508 / S288c) GN=BFR1 PE=1 SV=1	Nuclear segregation protein BFR1	BFR1	0	0.00870912	0.0782501	0.0325559	0.22594	0.0846009	0.105779	0.569273	0	0.200672	0.228011	0.200672	0.12953	0.625088	0.506283	0.256452	0	0.0170102	0.264989	0.226229	0.214057	0.161262	0.293988	0.161262	0.03	0.084	0.106	0.01	0.127	0.054	1.02	1.11	1.07	1.07	1.39	1.15	1.07	1.2	1.13
Q07653	Protein HBT1 OS=Saccharomyces cerevisiae (strain ATCC 204508 / S288c) GN=HBT1 PE=1 SV=1	Protein HBT1	HBT1	0	-0.040072	-0.0251428	0.0805665	0.218078	0.0705818	0.13276	-0.269104	0	-0.0282865	0.0737388	-0.0454444	0.184181	0.23368	0.168091	0.177124	0	-0.074759	-0.0307195	0.0915777	0.170441	0.159297	0.197056	0.196193	0.014	0.037	0.026	0.03	0.025	0.015	0.99	1.01	0.98	1.07	1.14	1.14	0.99	1.12	1.13
P53633	Prenylated Rab acceptor 1 OS=Saccharomyces cerevisiae (strain ATCC 204508 / S288c) GN=YIP3 PE=1 SV=2	Prenylated Rab acceptor 1	YIP3	0	0.174807	0.157373	0.318991	0.363385	0.135279	0.404608	-0.235904	0	0.0450636	-0.14955	0.159717	0.118146	0.437745	0.320033	0.166765	0	0.0167029	-0.36347	0.061663	-0.0534789	-0.0318489	-0.188152	-0.159724	0.065	0.069	0.142	0.132	0.094	0.059	1.08	0.98	0.93	1.21	1.24	0.92	1	1.12	1.13
P32898	Mitochondrial presequence protease OS=Saccharomyces cerevisiae (strain ATCC 204508 / S288c) GN=CYM1 PE=1 SV=2	Mitochondrial presequence protease	CYM1	0	0.21977	0.352573	0.490222	0.555456	0.288951	0.358148	-0.149063	0	0.240581	0.148504	-0.0809947	0.26479	0.513907	0.368965	0.365095	0	0.208235	0.238477	0.359184	0.379916	0.310929	0.321685	0.131403	0.121	0.083	0.088	0.034	0.06	0.072	1.15	1.1	1.11	1.25	1.34	1.2	1.12	1.26	1.13
A6ZT99	Nascent polypeptide-associated complex subunit alpha OS=Saccharomyces cerevisiae (strain YJM789) GN=EGD2 PE=3 SV=1	Nascent polypeptide-associated complex subunit alpha	EGD2	0	-0.0802255	-0.151612	-0.0232448	0.150855	0.0301252	-0.00626097	0.169862	0	-0.00739996	0.168649	-0.0355829	0.220248	0.29071	0.185024	0.115567	0	-0.0555235	-0.118431	0.312536	0.118247	0.247382	0.109443	0.310784	0.053	0.07	0.041	0.018	0.061	0.07	0.95	1.04	0.96	1.01	1.15	1.17	0.98	1.11	1.13
Q12118	Small glutamine-rich tetratricopeptide repeat-containing protein 2 OS=Saccharomyces cerevisiae (strain ATCC 204508 / S288c) GN=SGT2 PE=1 SV=1	Small glutamine-rich tetratricopeptide repeat-containing protein 2	SGT2	0	0.0580644	-0.0410784	0.157569	0.254201	0.0450386	0.190863	-2.23591	0	0.0452119	-0.0479091	-0.00484578	0.187732	0.178473	0.202548	0.250929	0	0.00846503	-0.104782	0.0787949	0.180468	0.207637	0.107105	0.162903	0.035	0.032	0.043	0.071	0.026	0.035	1	1	0.98	1.09	1.16	1.12	0.99	1.12	1.13
P32379	Proteasome subunit alpha type-5 OS=Saccharomyces cerevisiae (strain ATCC 204508 / S288c) GN=PUP2 PE=1 SV=2	Proteasome subunit alpha type-5	PUP2	0	0.166026	0.0733068	0.402296	0.380588	0.0874628	0.304003	-1.29821	0	0.135892	0.117957	0.239372	0.217882	0.194602	0.235258	0.295767	0	0.00932626	-0.130217	0.395929	0.273254	0.209016	0.171164	0.234933	0.058	0.05	0.053	0.106	0.035	0.022	1.06	1.06	0.97	1.15	1.18	1.15	1.03	1.16	1.13
P10659	S-adenosylmethionine synthase 1 OS=Saccharomyces cerevisiae (strain ATCC 204508 / S288c) GN=SAM1 PE=1 SV=2	S-adenosylmethionine synthase 1	SAM1	0	0.0435854	0.0567837	0.326217	0.323099	0.12759	0.167827	0.0977993	0	0.0604735	0.0832113	0.132612	0.143578	0.280985	0.157435	0.2421	0	0.00595472	0.0275808	0.22995	0.144958	0.257388	0.165794	0.270089	0.021	0.03	0.01	0.02	0.043	0.039	1.02	1.03	1.01	1.11	1.17	1.17	1.02	1.15	1.13
P48836	V-type proton ATPase subunit G OS=Saccharomyces cerevisiae (strain ATCC 204508 / S288c) GN=VMA10 PE=1 SV=1	V-type proton ATPase subunit G	VMA10	0	0.0150397	-0.00489956	0.280016	0.180925	0.127382	0.199244	0.263998	0	-0.0680683	0.0140884	-0.00104908	0.146466	0.217726	0.146655	0.24125	0	-0.0436269	-0.00940984	0.0885458	0.192933	0.138743	0.0061261	0.196286	0.007	0.03	0.016	0.035	0.034	0.067	1	0.99	0.99	1.12	1.15	1.08	0.99	1.12	1.13
P41818	Protein GLC8 OS=Saccharomyces cerevisiae (strain ATCC 204508 / S288c) GN=GLC8 PE=1 SV=1	Protein GLC8	GLC8	0	-0.346366	0.0303556	0.149149	0.161306	0.0690376	0.0300736	-0.824341	0	-0.238853	0.0126914	-0.297845	0.104367	0.163524	0.0403862	0.0850238	0	-0.373914	-0.0999517	0.352058	-0.0384302	0.0668248	-0.0653868	0.147051	0.139	0.095	0.13	0.019	0.043	0.074	0.94	0.95	0.9	1.04	1.07	1.04	0.93	1.05	1.13
P28777	Chorismate synthase OS=Saccharomyces cerevisiae (strain ATCC 204508 / S288c) GN=ARO2 PE=1 SV=1	Chorismate synthase	ARO2	0	-0.0412563	-0.0953871	0.188583	0.17502	0.0217517	0.0458366	0.162648	0	-0.105627	0.11183	0.0520875	0.0662131	0.236169	0.124851	0.197427	0	-0.0604376	-0.0280468	0.218372	0.151325	0.175096	0.168197	0.3055	0.033	0.075	0.021	0.012	0.039	0.054	0.97	1	0.98	1.02	1.14	1.16	0.98	1.11	1.13
P38986	L-asparaginase 1 OS=Saccharomyces cerevisiae (strain ATCC 204508 / S288c) GN=ASP1 PE=1 SV=1	L-asparaginase 1	ASP1	0	0.159707	0.119393	0.301201	0.273784	0.212755	0.123131	-0.659243	0	0.124205	0.254782	0.243281	0.234535	0.338789	0.340993	0.216643	0	-0.0183079	0.0429066	0.506225	0.284738	0.28745	0.29376	0.248073	0.057	0.088	0.022	0.044	0.049	0.017	1.07	1.09	1.01	1.12	1.23	1.21	1.06	1.19	1.13
P11076	ADP-ribosylation factor 1 OS=Saccharomyces cerevisiae (strain ATCC 204508 / S288c) GN=ARF1 PE=1 SV=3	ADP-ribosylation factor 1	ARF1	0	-0.26271	-0.176525	-0.0051143	0.0710853	-0.0269364	-0.0604222	-0.387684	0	-0.0636022	0.26146	0.064625	0.264285	0.409519	0.187704	0.127809	0	-0.0833432	-0.0950087	0.333648	0.155394	0.163137	0.114487	0.232091	0.094	0.123	0.036	0.016	0.105	0.041	0.91	1.05	0.96	0.97	1.19	1.13	0.97	1.09	1.12
P38777	Family of serine hydrolases 1 OS=Saccharomyces cerevisiae (strain ATCC 204508 / S288c) GN=FSH1 PE=1 SV=1	Family of serine hydrolases 1	FSH1	0	0.12441	-0.0225778	0.221752	0.350322	0.254046	0.0827111	-0.533255	0	0.205749	0.154633	0.302847	0.044075	0.456557	0.168754	0.210307	0	0.0203815	0.054665	0.447654	0.139635	0.163394	0.266939	0.276654	0.056	0.073	0.019	0.084	0.111	0.043	1.02	1.09	1.02	1.13	1.22	1.18	1.04	1.17	1.12
P33401	Phosphoglucomutase 1 OS=Saccharomyces cerevisiae (strain ATCC 204508 / S288c) GN=PGM1 PE=1 SV=1	Phosphoglucomutase 1	PGM1	0	0.0862534	0.308715	0.0826191	0.425404	0.299769	0.394469	0.241423	0	-0.170817	-0.247014	-0.447586	0.021412	0.0561285	-0.0995605	0.0492517	0	-0.0836286	-0.0155883	-0.000785247	0.0901502	0.217309	0.147088	-0.0257419	0.113	0.089	0.031	0.046	0.06	0.085	1.1	0.91	0.98	1.27	1	1.08	1	1.12	1.12
P43588	Ubiquitin carboxyl-terminal hydrolase RPN11 OS=Saccharomyces cerevisiae (strain ATCC 204508 / S288c) GN=RPN11 PE=1 SV=1	Ubiquitin carboxyl-terminal hydrolase RPN11	RPN11	0	0.0667836	0.139881	0.2858	0.402622	0.223223	0.318822	-0.899818	0	0.0877381	0.0928657	0.124686	0.260433	0.436133	0.298341	0.200616	0	-0.0527919	0.138432	0.182847	0.194378	0.226558	0.0781562	-0.116268	0.049	0.036	0.069	0.047	0.083	0.118	1.05	1.04	1.02	1.21	1.24	1.05	1.04	1.17	1.12
P00830	ATP synthase subunit beta, mitochondrial OS=Saccharomyces cerevisiae (strain ATCC 204508 / S288c) GN=ATP2 PE=1 SV=2	ATP synthase subunit beta, mitochondrial	ATP2	0	0.0283017	0.0821557	0.213021	0.261262	0.136172	0.0321317	1.40743	0	0.152412	0.298994	0.255386	0.213663	0.46566	0.289889	0.283907	0	-0.0502935	-0.0499116	0.350108	0.199407	0.222432	0.210208	0.23917	0.029	0.103	0.02	0.051	0.073	0.01	1.03	1.11	0.98	1.06	1.27	1.17	1.04	1.17	1.12
P40363	S-formylglutathione hydrolase OS=Saccharomyces cerevisiae (strain ATCC 204508 / S288c) GN=YJL068C PE=1 SV=1	S-formylglutathione hydrolase	YJL068C	0	0.0924514	0.0208982	0.187939	0.171678	0.0104869	0.227645	-0.930291	0	0.112683	0.174468	0.183585	0.176237	0.314919	0.340651	0.202227	0	0.115376	-0.010118	0.360767	0.152529	0.186825	0.418322	0.164704	0.034	0.061	0.049	0.106	0.05	0.1	1.03	1.07	1.03	1.09	1.22	1.2	1.04	1.17	1.12
P45978	Protein SCD6 OS=Saccharomyces cerevisiae (strain ATCC 204508 / S288c) GN=SCD6 PE=1 SV=1	Protein SCD6	SCD6	0	-0.104312	0.0518624	0.0178235	0.0898053	0.00397985	0.0109183	-0.295275	0	0.0848222	0.378907	0.399419	0.403663	0.579658	0.510667	0.392495	0	0.00266356	0.293932	-0.0385977	0.222936	0.256163	0.269495	0.118404	0.055	0.142	0.121	0.003	0.065	0.057	0.99	1.12	1.08	1.01	1.41	1.16	1.06	1.19	1.12
P50095	Inosine-5'-monophosphate dehydrogenase 3 OS=Saccharomyces cerevisiae (strain ATCC 204508 / S288c) GN=IMD3 PE=1 SV=1	Inosine-5'-monophosphate dehydrogenase 3	IMD3	0	0.131055	0.264848	-0.127413	0.308583	0.230922	0.133042	-0.170878	0	0.285502	0.442274	-0.134143	0.457431	0.64701	0.660989	0.344778	0	0.384003	0.423783	0.334559	0.463475	0.57004	0.50686	0.119106	0.092	0.152	0.154	0.048	0.119	0.161	1.1	1.19	1.22	1.14	1.47	1.33	1.17	1.31	1.12
P17555	Adenylyl cyclase-associated protein OS=Saccharomyces cerevisiae (strain ATCC 204508 / S288c) GN=SRV2 PE=1 SV=1	Adenylyl cyclase-associated protein	SRV2	0	0.0906159	-0.00230156	0.0423019	0.253163	0.128275	0.210075	-0.76822	0	0.0246996	-0.14979	-0.217051	0.0088306	0.038241	0.0322984	0.15023	0	0.223457	0.126049	0.239861	0.312703	0.44957	0.352664	0.263345	0.037	0.064	0.077	0.04	0.047	0.065	1.02	0.97	1.09	1.12	1.05	1.28	1.03	1.15	1.12
P04037	Cytochrome c oxidase subunit 4, mitochondrial OS=Saccharomyces cerevisiae (strain ATCC 204508 / S288c) GN=COX4 PE=1 SV=1	Cytochrome c oxidase subunit 4, mitochondrial	COX4	0	0.0171376	0.122579	0.182972	0.333136	0.104126	0.215376	-0.0995357	0	-0.044799	-0.0458827	-0.177867	0.0703727	0.185978	0.0846388	0.217332	0	0.12783	0.037632	0.210448	0.251153	0.281396	0.277424	0.190617	0.047	0.018	0.046	0.054	0.048	0.035	1.03	0.98	1.04	1.12	1.12	1.19	1.02	1.14	1.12
P21243	Proteasome subunit alpha type-1 OS=Saccharomyces cerevisiae (strain ATCC 204508 / S288c) GN=SCL1 PE=1 SV=1	Proteasome subunit alpha type-1	SCL1	0	-0.000422314	0.180738	-0.03159	0.33521	0.104238	0.2746	-1.66067	0	-0.0896082	0.0300826	-0.22685	0.134999	0.169195	0.134999	0.170838	0	-0.11269	-0.0223732	-0.0368906	0.144299	0.153996	0.17581	0.125184	0.074	0.043	0.041	0.083	0.014	0.018	1.04	0.99	0.97	1.14	1.12	1.11	1	1.12	1.12
P25372	Thioredoxin-3, mitochondrial OS=Saccharomyces cerevisiae (strain ATCC 204508 / S288c) GN=TRX3 PE=1 SV=1	Thioredoxin-3, mitochondrial	TRX3	0	0.0932403	-0.0613095	0.261055	0.156602	0.162227	0.154095	-0.214041	0	0.0412854	0.0565036	0.0282371	0.0825447	0.255739	0.109226	0.226079	0	-0.0376347	-0.111599	0.38587	0.116101	0.112981	-0.0190368	0.308356	0.054	0.02	0.039	0.004	0.053	0.115	1.01	1.02	0.97	1.12	1.15	1.1	1	1.12	1.12
P29311	Protein BMH1 OS=Saccharomyces cerevisiae (strain ATCC 204508 / S288c) GN=BMH1 PE=1 SV=4	Protein BMH1	BMH1	0	-0.0823988	-0.0860507	0.10902	0.217247	0.0332011	0.120949	-3.07535	0	0.00680021	0.177377	0.0606895	0.178082	0.351308	0.138471	0.0935628	0	-0.0616661	-0.124161	0.320094	0.138319	0.179101	0.0913874	0.236976	0.034	0.071	0.043	0.043	0.098	0.051	0.96	1.05	0.96	1.06	1.15	1.13	0.99	1.11	1.12
P38836	Putative metallocarboxypeptidase ECM14 OS=Saccharomyces cerevisiae (strain ATCC 204508 / S288c) GN=ECM14 PE=1 SV=1	Putative metallocarboxypeptidase ECM14	ECM14	0	-0.111705	0.331737	0.294208	0.311008	-0.0117029	0.26756	-0.875981	0	0.0550068	0.070492	0.296254	0.232523	0.40204	0.299762	0.135738	0	-0.0321122	0.0948097	0.338169	0.153092	0.29888	0.186963	0.194119	0.165	0.026	0.046	0.136	0.092	0.044	1.06	1.03	1.02	1.1	1.22	1.17	1.04	1.16	1.12
P43616	Cys-Gly metallodipeptidase DUG1 OS=Saccharomyces cerevisiae (strain ATCC 204508 / S288c) GN=DUG1 PE=1 SV=1	Cys-Gly metallodipeptidase DUG1	DUG1	0	-0.0340489	-0.100593	0.259532	0.0484485	-0.00572294	-0.0829196	-0.100003	0	0.0473683	0.226431	0.160876	0.186889	0.431858	0.194421	0.124281	0	-0.101269	-0.0422977	0.374235	0.133508	0.271062	0.136611	0.394806	0.035	0.084	0.035	0.038	0.114	0.089	0.97	1.07	0.97	0.97	1.19	1.21	1	1.12	1.12
P07275	Delta-1-pyrroline-5-carboxylate dehydrogenase, mitochondrial OS=Saccharomyces cerevisiae (strain ATCC 204508 / S288c) GN=PUT2 PE=1 SV=2	Delta-1-pyrroline-5-carboxylate dehydrogenase, mitochondrial	PUT2	0	0	0.084435	0.190153	0.264649	0.13029	0.209839	-0.323005	0	-0.147557	0.135306	-0.189464	0.127917	0.239129	0.0338362	0.069555	0	-0.0957802	-0.113615	0.295656	0.071402	0.168923	0.124464	0.218421	0.034	0.098	0.043	0.039	0.077	0.033	1.02	1	0.95	1.13	1.08	1.13	0.99	1.11	1.12
P31116	Homoserine dehydrogenase OS=Saccharomyces cerevisiae (strain ATCC 204508 / S288c) GN=HOM6 PE=1 SV=1	Homoserine dehydrogenase	HOM6	0	0.234565	0.29014	0.163499	0.464668	0.234565	0.44726	-0.218749	0	0.0756263	0.18498	0.137267	0.154127	0.295135	0.158797	0.191072	0	0.125606	0.0945794	0.365785	0.314305	0.282661	0.425633	0.107238	0.104	0.065	0.045	0.104	0.05	0.11	1.13	1.06	1.05	1.27	1.16	1.21	1.08	1.21	1.12
P47771	Aldehyde dehydrogenase [NAD(P)+] 1 OS=Saccharomyces cerevisiae (strain ATCC 204508 / S288c) GN=ALD2 PE=1 SV=2	Aldehyde dehydrogenase [NAD(P)+] 1	ALD2	0	0.0540156	-0.0449446	0.249468	0.23289	0.050831	0.129616	-0.657307	0	-0.0301581	-0.0866074	-0.0159689	0.13379	0.08764	0.0720964	0.041562	0	0.073027	-0.0961134	0.342326	0.292679	0.340817	0.260396	0.256328	0.034	0.03	0.059	0.039	0.016	0.033	1	0.97	1	1.06	1.05	1.22	0.99	1.11	1.12
P00812	Arginase OS=Saccharomyces cerevisiae (strain ATCC 204508 / S288c) GN=CAR1 PE=1 SV=1	Arginase	CAR1	0	0.272988	0.129711	0.479877	0.416249	0.184636	0.200446	-0.0150605	0	0.115432	0.0556065	0.286901	0.179929	0.255337	0.168415	0.0731145	0	0.0659227	0.0159957	0.107452	0.297597	0.33818	0.218867	0.477735	0.095	0.04	0.024	0.008	0.063	0.09	1.1	1.04	1.02	1.14	1.12	1.27	1.05	1.18	1.12
P00127	Cytochrome b-c1 complex subunit 6 OS=Saccharomyces cerevisiae (strain ATCC 204508 / S288c) GN=QCR6 PE=1 SV=2	Cytochrome b-c1 complex subunit 6	QCR6	0	-0.119815	-0.193545	-0.1353	0.123692	-0.0876597	0.18732	-1.93834	0	-0.129588	-0.483479	-0.121991	0.0573332	-0.217527	0.0506261	0.0207387	0	-0.129845	-0.156306	-0.192567	-0.0336102	0.11711	0.0216219	0.119619	0.068	0.167	0.059	0.134	0.099	0.038	0.93	0.88	0.94	1.04	0.97	1.06	0.92	1.02	1.12
P11986	Inositol-3-phosphate synthase OS=Saccharomyces cerevisiae (strain ATCC 204508 / S288c) GN=INO1 PE=1 SV=3	Inositol-3-phosphate synthase	INO1	0	0.022173	-0.0694214	0.267744	0.134318	-0.0415573	0.23331	-0.396046	0	0.0965814	0.0342113	0.308472	0.170555	0.186602	0.338406	0.252401	0	0.254875	0.167782	0.0902562	0.478805	0.363212	0.251102	0.265067	0.033	0.034	0.089	0.134	0.053	0.043	0.99	1.03	1.11	1.07	1.2	1.23	1.04	1.17	1.12
P40168	Uncharacterized protein YNL195C OS=Saccharomyces cerevisiae (strain ATCC 204508 / S288c) GN=YNL195C PE=4 SV=2	Uncharacterized protein YNL195C	YNL195C	0	-0.0446657	-0.0558463	0.150185	0.187897	0.0648859	0.0736713	-0.355028	0	-0.0488859	0.031246	-0.0655564	0.089844	0.192559	0.12993	0.015934	0	0.0110193	-0.0945666	0.298679	0.146101	0.267774	0.0952337	0.314553	0.021	0.028	0.04	0.004	0.062	0.078	0.98	1	0.98	1.05	1.08	1.17	0.98	1.1	1.12
Q04344	Hit family protein 1 OS=Saccharomyces cerevisiae (strain ATCC 204508 / S288c) GN=HNT1 PE=1 SV=2	Hit family protein 1	HNT1	0	0.0838518	0.123444	0.00312475	0.239275	0.24298	0.198421	-0.0271559	0	0.0318913	0.260382	-0.149747	0.150456	0.291032	0.204358	0.197826	0	-0.069348	0.156164	-0.0315931	0.208186	0.213436	0.320886	0.167802	0.043	0.101	0.081	0.022	0.036	0.055	1.05	1.07	1.02	1.17	1.17	1.18	1.05	1.17	1.12
Q12123	Inactive diphosphatase DCS2 OS=Saccharomyces cerevisiae (strain ATCC 204508 / S288c) GN=DCS2 PE=1 SV=3	Inactive diphosphatase DCS2	DCS2	0	0.0472516	0.0221098	0.138766	0.2076	0.0809374	0.0667112	-0.547423	0	-0.0074801	0.0459436	0.0771945	0.189311	0.2191	0.160611	0.197513	0	-0.0303416	0.0177296	0.280743	0.248007	0.237496	0.199491	0.288273	0.016	0.02	0.017	0.007	0.02	0.031	1.02	1.01	1	1.05	1.14	1.18	1.01	1.13	1.12
P31373	Cystathionine gamma-lyase OS=Saccharomyces cerevisiae (strain ATCC 204508 / S288c) GN=CYS3 PE=1 SV=2	Cystathionine gamma-lyase	CYS3	0	-0.0602981	-0.13827	0.131727	-0.0200886	-0.11119	-0.144536	-0.186167	0	0.137429	0.312836	0.337172	0.210989	0.334888	0.283013	0.428007	0	-0.030963	-0.125302	0.598883	0.0740216	0.187074	0.0957821	0.476648	0.048	0.109	0.045	0.016	0.051	0.142	0.96	1.11	0.97	0.92	1.27	1.2	1.01	1.13	1.12
P40495	Homoisocitrate dehydrogenase, mitochondrial OS=Saccharomyces cerevisiae (strain ATCC 204508 / S288c) GN=LYS12 PE=1 SV=1	Homoisocitrate dehydrogenase, mitochondrial	LYS12	0	0.0826695	-0.0259765	0.246463	0.227239	0.0779822	0.15763	0.0175913	0	-0.0280392	0.0384764	0.132638	0.134639	0.226378	0.148868	0.1407	0	0.0432918	-0.066361	0.328998	0.172708	0.228183	0.128027	0.245144	0.04	0.023	0.038	0.039	0.033	0.043	1.01	1	1	1.09	1.13	1.15	1	1.12	1.12
P06106	Homocysteine/cysteine synthase OS=Saccharomyces cerevisiae (strain ATCC 204508 / S288c) GN=MET17 PE=1 SV=3	Homocysteine/cysteine synthase	MET17	0	-0.0451605	-0.044783	0.183583	0.226282	0.0570409	0.140079	-0.338721	0	-0.0576589	0.166033	0.0142201	0.103483	0.319879	0.112784	0.0484474	0	0.0188393	0.0400203	0.363202	0.151093	0.27631	0.161981	0.275057	0.018	0.082	0.014	0.041	0.1	0.045	0.98	1.03	1.01	1.07	1.12	1.18	1.01	1.12	1.12
P50861	6,7-dimethyl-8-ribityllumazine synthase OS=Saccharomyces cerevisiae (strain ATCC 204508 / S288c) GN=RIB4 PE=1 SV=2	6,7-dimethyl-8-ribityllumazine synthase	RIB4	0	0.069796	0.00919796	0.437923	0.412498	0.130903	0.164224	0.13427	0	-0.000628488	0.041904	0.173272	0.185664	0.350793	-0.00167658	-0.0102998	0	-0.121881	-0.236626	0.445944	0.11984	0.136033	-0.0400928	0.272687	0.026	0.017	0.082	0.016	0.148	0.108	1.02	1.01	0.92	1.11	1.09	1.09	0.98	1.1	1.11
Q08245	Protein ZEO1 OS=Saccharomyces cerevisiae (strain ATCC 204508 / S288c) GN=ZEO1 PE=1 SV=3	Protein ZEO1	ZEO1	0	-0.196146	-0.13914	0.068979	0.0653884	-0.126765	0.0290896	-0.0371648	0	-0.0697258	0.298671	0.181799	0.197366	0.434638	0.149255	0.167725	0	-0.353731	-0.175981	0.292058	0.0235441	-0.0287031	-0.105404	0.289922	0.071	0.14	0.122	0.076	0.114	0.15	0.93	1.06	0.89	0.97	1.19	1.04	0.96	1.07	1.11
P20967	2-oxoglutarate dehydrogenase, mitochondrial OS=Saccharomyces cerevisiae (strain ATCC 204508 / S288c) GN=KGD1 PE=1 SV=2	2-oxoglutarate dehydrogenase, mitochondrial	KGD1	0	-0.0164109	0.134446	0.142469	0.346785	0.117204	0.227075	-1.36628	0	-0.0687128	-0.0220378	-0.241867	0.075764	0.245322	0.112549	0.178378	0	-0.0408723	-0.0621862	0.220446	0.177594	0.165255	0.156554	-0.0604463	0.058	0.024	0.022	0.054	0.046	0.086	1.03	0.98	0.98	1.13	1.13	1.06	0.99	1.11	1.11
Q12443	Reticulon-like protein 2 OS=Saccharomyces cerevisiae (strain ATCC 204508 / S288c) GN=RTN2 PE=1 SV=1	Reticulon-like protein 2	RTN2	0	-0.187596	0.221027	0.1453	0.24778	-0.0249431	0.0486286	-0.332929	0	-0.178327	0.0277522	-0.193403	0.0973631	0.211969	-0.101566	0.0516964	0	0.351472	0.142019	-0.0766213	0.756729	0.534336	0.418143	0.534336	0.142	0.076	0.124	0.036	0.109	0.046	1.01	0.97	1.13	1.01	1.04	1.41	1.04	1.15	1.11
P60010	Actin OS=Saccharomyces cerevisiae (strain ATCC 204508 / S288c) GN=ACT1 PE=1 SV=1	Actin	ACT1	0	-0.190842	0.0821383	0.268422	0.19224	0.120476	0.257356	-0.715005	0	0.158302	0.160383	0.180344	-0.0408522	0.25948	0.123528	0.205082	0	0.215365	0.111914	0.590094	0.322395	0.314149	0.354185	0.127827	0.095	0.063	0.074	0.067	0.047	0.082	0.98	1.08	1.08	1.14	1.15	1.2	1.05	1.16	1.11
Q04792	Glutamate decarboxylase OS=Saccharomyces cerevisiae (strain ATCC 204508 / S288c) GN=GAD1 PE=1 SV=1	Glutamate decarboxylase	GAD1	0	-0.16556	-0.0850489	-0.0886464	0.144271	-0.0287784	0.0538757	-0.365263	0	-0.0411782	0.116337	-0.121731	0.145502	0.276176	0.153473	0.106986	0	-0.0838128	-0.0886521	0.00674341	0.183796	0.151752	0.133955	0.178805	0.057	0.057	0.035	0.041	0.061	0.016	0.94	1.02	0.96	1.01	1.13	1.11	0.97	1.09	1.11
P15624	Phenylalanine--tRNA ligase beta subunit OS=Saccharomyces cerevisiae (strain ATCC 204508 / S288c) GN=FRS1 PE=1 SV=3	Phenylalanine--tRNA ligase beta subunit	FRS1	0	-0.191794	0.235322	-0.052357	0.462139	0.271579	0.193576	-1.27862	0	-0.153416	0.110089	-0.252901	0.150731	0.395522	0.00918614	-0.0534093	0	-0.298991	0.124837	-0.210726	0.065095	0.12314	0.271487	-0.264145	0.149	0.091	0.146	0.038	0.175	0.184	1.02	0.99	0.97	1.18	1.1	1.04	0.99	1.1	1.11
Q05911	Adenylosuccinate lyase OS=Saccharomyces cerevisiae (strain ATCC 204508 / S288c) GN=ADE13 PE=1 SV=1	Adenylosuccinate lyase	ADE13	0	-0.0736334	0.0202005	0.0840876	0.208362	0.0513656	0.0617102	-0.179747	0	-0.104462	0.103541	-0.0805478	0.143237	0.20829	0.108451	0.0912953	0	-0.0315698	0.00891402	0.196106	0.178163	0.247533	0.167669	0.301103	0.034	0.072	0.015	0.005	0.044	0.046	0.99	1	0.99	1.04	1.1	1.18	0.99	1.11	1.11
P00549	Pyruvate kinase 1 OS=Saccharomyces cerevisiae (strain ATCC 204508 / S288c) GN=CDC19 PE=1 SV=2	Pyruvate kinase 1	CDC19	0	-0.09861	0.0233573	0.0264874	0.153273	-0.0489451	0.015518	-0.832708	0	0.0327266	0.448617	0.264925	0.200329	0.513599	0.288418	0.335169	0	-0.0279547	0.0621259	0.403774	0.238058	0.213631	0.214923	0.282013	0.044	0.181	0.032	0.032	0.084	0.027	0.98	1.13	1.01	0.99	1.3	1.18	1.04	1.16	1.11
P09624	Dihydrolipoyl dehydrogenase, mitochondrial OS=Saccharomyces cerevisiae (strain ATCC 204508 / S288c) GN=LPD1 PE=1 SV=1	Dihydrolipoyl dehydrogenase, mitochondrial	LPD1	0	-0.0250989	0.0131637	0.0490592	0.24043	0.0851663	0.0817834	0.165181	0	-0.0913846	0.0507083	-0.140272	0.143208	0.213395	0.0675493	0.155582	0	-0.0314187	-0.0385761	0.225015	0.131186	0.191935	0.123118	0.246855	0.013	0.05	0.014	0.002	0.051	0.043	1	0.99	0.98	1.06	1.11	1.14	0.99	1.1	1.11
Q3E841	Uncharacterized protein YNR034W-A OS=Saccharomyces cerevisiae (strain ATCC 204508 / S288c) GN=YNR034W-A PE=1 SV=1	Uncharacterized protein YNR034W-A	YNR034W-A	0	0.0242911	-0.0296997	0.208561	0.31203	0.10045	0.170614	0.0635764	0	0.0156466	-0.029606	-0.0258326	0.163157	0.342205	0.400856	0.0416527	0	0.0284991	-0.142997	0.258581	0.166677	0.0179556	0.102963	-0.13929	0.019	0.016	0.063	0.034	0.129	0.084	1	1	0.98	1.1	1.21	1	0.99	1.1	1.11
A6ZYI0	Adenylate kinase OS=Saccharomyces cerevisiae (strain YJM789) GN=ADK1 PE=3 SV=1	Adenylate kinase	ADK1	0	-0.0485649	-0.0761191	0.209914	0.161872	-0.0217587	-0.0243102	-0.74976	0	-0.0272432	0.118782	0.0396463	0.167509	0.281338	0.155663	0.206894	0	-0.0561116	-0.0811268	0.440559	0.145808	0.224068	-0.00670852	0.359857	0.027	0.055	0.029	0.001	0.044	0.126	0.97	1.02	0.97	0.98	1.16	1.15	0.99	1.1	1.11
P32911	Eukaryotic translation initiation factor eIF-1 OS=Saccharomyces cerevisiae (strain ATCC 204508 / S288c) GN=SUI1 PE=1 SV=1	Eukaryotic translation initiation factor eIF-1	SUI1	0	-0.0362754	0.0124301	-0.149713	0.138096	0.0279517	0.0258207	-0.27941	0	0.00561871	0.0458037	-0.121306	0.0845457	0.244526	0.0795819	0.218312	0	-0.054754	-0.137703	0.138666	0.236979	0.147162	0.203795	0.214125	0.017	0.017	0.048	0.001	0.06	0.025	0.99	1.01	0.96	1.02	1.13	1.14	0.99	1.1	1.11
P14907	Nucleoporin NSP1 OS=Saccharomyces cerevisiae (strain ATCC 204508 / S288c) GN=NSP1 PE=1 SV=1	Nucleoporin NSP1	NSP1	0	0.12907	0.247237	0.254979	0.452812	0.221329	0.359495	-0.547706	0	-0.139122	-0.0775234	-0.32742	-0.0173559	0.113651	0.0121687	-0.031613	0	0.0109846	-0.0240305	0.151469	0.203983	0.206451	0.190331	0.142797	0.085	0.048	0.012	0.068	0.052	0.023	1.09	0.95	1	1.22	1.02	1.13	1.01	1.13	1.11
P25373	Glutaredoxin-1 OS=Saccharomyces cerevisiae (strain ATCC 204508 / S288c) GN=GRX1 PE=1 SV=1	Glutaredoxin-1	GRX1	0	-0.0027195	0.132803	0.0433564	0.241593	0.258499	0.168052	-0.307734	0	0.140828	0.181434	-0.00366632	0.187234	0.234062	0.212735	0.284839	0	-0.343609	0.0523527	-0.0403851	0.115971	-0.0220065	0.0146987	0.193849	0.055	0.065	0.143	0.044	0.026	0.082	1.03	1.08	0.94	1.16	1.18	1.05	1.02	1.13	1.11
P47001	Cell wall mannoprotein CIS3 OS=Saccharomyces cerevisiae (strain ATCC 204508 / S288c) GN=CIS3 PE=1 SV=1	Cell wall mannoprotein CIS3	CIS3	0	0.0545915	0.0408217	-0.0169195	0.151744	-0.0134326	0.0525136	-0.412596	0	-0.00702043	0.0876875	0.058639	0.148689	0.198919	0.151557	0.335363	0	-0.108321	-0.191776	0.0134165	0.0934355	0.16266	0.115678	0.205146	0.02	0.037	0.067	0.032	0.067	0.031	1.02	1.02	0.93	1.01	1.17	1.12	0.99	1.1	1.11
P34730	Protein BMH2 OS=Saccharomyces cerevisiae (strain ATCC 204508 / S288c) GN=BMH2 PE=1 SV=3	Protein BMH2	BMH2	0	-0.024109	-0.0785204	0.0864673	0.188225	-0.00653861	0.00608084	-2.69208	0	-0.0122263	0.202503	0.392028	0.0979115	0.313031	0.29081	0.157991	0	-0.0746261	0.0264002	0.438961	0.156138	0.108509	0.146412	0.34854	0.028	0.085	0.036	0.006	0.057	0.091	0.98	1.05	0.99	1	1.19	1.15	1	1.12	1.11
P46681	D-2-hydroxyglutarate--pyruvate transhydrogenase DLD2 OS=Saccharomyces cerevisiae (strain ATCC 204508 / S288c) GN=DLD2 PE=1 SV=1	D-2-hydroxyglutarate--pyruvate transhydrogenase DLD2	DLD2	0	0.290621	0.33262	0.104943	0.409661	0.341118	0.310538	-0.378205	0	0.228802	0.248941	0.268804	0.212263	0.574217	0.272531	0.306169	0	0.0330529	0.0685572	0.0637669	0.164155	0.255212	0.120227	0.0428229	0.121	0.093	0.024	0.015	0.118	0.075	1.16	1.12	1.02	1.25	1.31	1.1	1.1	1.22	1.11
P40414	Tropomyosin-2 OS=Saccharomyces cerevisiae (strain ATCC 204508 / S288c) GN=TPM2 PE=1 SV=1	Tropomyosin-2	TPM2	0	-0.0702693	0.0206285	0.199123	0.225445	-0.0307647	0.145044	-2.43462	0	0.00594436	0.0710258	0.0246082	0.14322	0.161739	0.168115	0.196058	0	-0.0901903	-0.149221	0.241898	0.0838256	0.117949	0.0885306	0.229769	0.033	0.028	0.052	0.086	0.013	0.052	0.99	1.02	0.95	1.04	1.13	1.11	0.98	1.09	1.11
P22146	1,3-beta-glucanosyltransferase GAS1 OS=Saccharomyces cerevisiae (strain ATCC 204508 / S288c) GN=GAS1 PE=1 SV=2	1,3-beta-glucanosyltransferase GAS1	GAS1	0	-0.238606	0.00832727	-0.230418	0.0897127	-0.0589517	-0.074257	-1.13486	0	-0.311226	0.224994	-0.204599	0.103004	0.269422	0.0674101	0.182027	0	-0.256843	-0.0906983	-0.111962	0.259583	0.108699	0.0820791	0.210524	0.094	0.183	0.089	0.008	0.07	0.048	0.95	0.99	0.93	0.95	1.13	1.1	0.96	1.06	1.11
P00729	Carboxypeptidase Y OS=Saccharomyces cerevisiae (strain ATCC 204508 / S288c) GN=PRC1 PE=1 SV=1	Carboxypeptidase Y	PRC1	0	0.113639	0.0572564	0.147337	0.280622	0.0547543	0.205505	-1.37148	0	0.0293017	0.000554918	-0.0502627	0.223238	0.218952	0.169802	0.230668	0	0.0145096	-0.0473672	0.144542	0.208896	0.235194	0.160226	0.104099	0.039	0.012	0.022	0.074	0.022	0.046	1.04	1.01	0.99	1.1	1.15	1.12	1.01	1.12	1.11
P17255	V-type proton ATPase catalytic subunit A OS=Saccharomyces cerevisiae (strain ATCC 204508 / S288c) GN=VMA1 PE=1 SV=3	V-type proton ATPase catalytic subunit A	VMA1	0	0.0493668	0.0584007	0.181222	0.266937	0.114278	0.15205	-0.301248	0	0.0446284	0.104795	0.0658598	0.17325	0.294125	0.156348	0.186195	0	0.0459326	0.0117504	0.266554	0.228517	0.259942	0.160036	0.199442	0.022	0.037	0.017	0.019	0.051	0.035	1.03	1.04	1.01	1.1	1.16	1.15	1.02	1.14	1.11
P23254	Transketolase 1 OS=Saccharomyces cerevisiae (strain ATCC 204508 / S288c) GN=TKL1 PE=1 SV=4	Transketolase 1	TKL1	0	0.000348561	0.0511969	0.266651	0.241857	0.108906	0.135225	-0.692964	0	-0.0434987	0.102823	0.0173123	0.188516	0.296327	0.143332	0.115335	0	-0.042369	-0.0558812	0.343473	0.129322	0.200641	0.076122	0.152659	0.021	0.053	0.02	0.013	0.069	0.043	1.01	1.01	0.98	1.09	1.14	1.11	1	1.11	1.11
P05759	Ubiquitin-40S ribosomal protein S31 OS=Saccharomyces cerevisiae (strain ATCC 204508 / S288c) GN=RPS31 PE=1 SV=3	Ubiquitin-40S ribosomal protein S31	RPS31	0	0.0643291	-0.0720349	0.0920896	0.114615	-0.0186727	0.053229	-0.382281	0	0.0112181	0.0334636	0.0614092	0.169856	0.283262	0.171943	0.159686	0	0.0101877	-0.126402	0.284514	0.141112	0.162622	0.173881	0.240084	0.047	0.012	0.052	0.035	0.048	0.029	1	1.01	0.97	1.01	1.15	1.14	0.99	1.1	1.11
P32628	UV excision repair protein RAD23 OS=Saccharomyces cerevisiae (strain ATCC 204508 / S288c) GN=RAD23 PE=1 SV=1	UV excision repair protein RAD23	RAD23	0	-0.0901283	-0.0057564	0.258159	0.158094	-0.0238946	0.150566	-1.6228	0	-0.104775	0.12427	-0.0567852	0.125476	0.301751	0.10585	0.113773	0	-0.108521	-0.269153	0.355231	-0.0112444	0.0278412	-0.00307799	0.149453	0.035	0.08	0.093	0.085	0.078	0.057	0.98	1.01	0.92	1.05	1.13	1.04	0.97	1.07	1.11
P36059	ATP-dependent (S)-NAD(P)H-hydrate dehydratase OS=Saccharomyces cerevisiae (strain ATCC 204508 / S288c) GN=YKL151C PE=1 SV=1	ATP-dependent (S)-NAD(P)H-hydrate dehydratase	YKL151C	0	-0.0884122	-0.0154806	0.240547	0.158234	0.110897	0.0764258	-0.215494	0	-0.00115277	0.111127	0.0299355	0.0801236	0.279599	0.017182	0.102299	0	0.0425034	-0.0133008	0.466017	0.160116	0.19691	0.200817	0.276813	0.032	0.045	0.02	0.017	0.094	0.031	0.98	1.03	1.01	1.07	1.1	1.17	1	1.11	1.11
P11632	Non-histone chromosomal protein 6A OS=Saccharomyces cerevisiae (strain ATCC 204508 / S288c) GN=NHP6A PE=1 SV=1	Non-histone chromosomal protein 6A	NHP6A	0	-0.0245422	-0.094578	0.0218507	0.0734211	-0.0351894	-0.00115926	0.0767212	0	0.0135858	0.303754	0.13234	0.113052	0.371873	0.181313	0.14379	0	0.0977277	0.0682036	0.408508	0.195639	0.347551	0.314403	0.347551	0.034	0.123	0.035	0.017	0.087	0.013	0.97	1.08	1.04	0.99	1.18	1.26	1.03	1.14	1.11
P37291	Serine hydroxymethyltransferase, cytosolic OS=Saccharomyces cerevisiae (strain ATCC 204508 / S288c) GN=SHM2 PE=1 SV=2	Serine hydroxymethyltransferase, cytosolic	SHM2	0	-0.0333676	-0.0619182	0.0780838	0.176242	0.00145314	0.071181	-1.03635	0	0.0925575	0.18347	0.229897	0.18025	0.353624	0.216946	0.195395	0	-0.0215748	-0.0503614	0.39179	0.140781	0.14241	0.131173	0.271272	0.021	0.064	0.017	0.034	0.06	0.055	0.98	1.07	0.98	1.03	1.2	1.14	1.01	1.12	1.11
P19882	Heat shock protein 60, mitochondrial OS=Saccharomyces cerevisiae (strain ATCC 204508 / S288c) GN=HSP60 PE=1 SV=1	Heat shock protein 60, mitochondrial	HSP60	0	-0.0421166	0.0278418	0.290816	0.247968	0.0845737	0.106685	-2.13171	0	-0.0964718	0.143262	-0.188408	0.0909503	0.27373	0.0623416	0.0732309	0	-0.14534	-0.122858	0.34698	0.0700278	0.114797	0.0553911	0.232459	0.024	0.084	0.055	0.011	0.084	0.063	1	1.01	0.94	1.07	1.1	1.1	0.98	1.09	1.11
P28240	Isocitrate lyase OS=Saccharomyces cerevisiae (strain ATCC 204508 / S288c) GN=ICL1 PE=1 SV=1	Isocitrate lyase	ICL1	0	-0.0122019	0.0240986	-0.00404563	0.204513	0.0420458	0.0971914	-0.334315	0	-0.0673011	0.089356	-0.0642196	0.176461	0.0796545	0.135718	0.126657	0	-0.0131978	-0.108189	0.189962	0.208921	0.217444	0.173931	0.289882	0.013	0.055	0.04	0.027	0.021	0.041	1	1.01	0.97	1.05	1.08	1.17	0.99	1.1	1.11
P00175	Cytochrome b2, mitochondrial OS=Saccharomyces cerevisiae (strain ATCC 204508 / S288c) GN=CYB2 PE=1 SV=1	Cytochrome b2, mitochondrial	CYB2	0	-0.0658281	-0.074038	0.121971	0.118701	-0.0318116	0.0340796	-0.545425	0	-0.0255762	-0.0109887	0.0611965	0.200205	0.260728	0.10498	0.127174	0	0.0156322	-0.0796483	0.337271	0.121566	0.196045	0.146877	0.218837	0.028	0.009	0.035	0.032	0.059	0.025	0.97	0.99	0.99	1	1.12	1.14	0.98	1.09	1.11
P38067	Succinate-semialdehyde dehydrogenase [NADP(+)] OS=Saccharomyces cerevisiae (strain ATCC 204508 / S288c) GN=UGA2 PE=1 SV=2	Succinate-semialdehyde dehydrogenase [NADP(+)]	UGA2	0	-0.000546217	-0.0184118	0.0796758	0.200678	-0.0556718	0.0881774	-0.536367	0	0.048735	0.0120392	0.0968825	0.148937	0.199179	0.188727	0.181046	0	0.00300529	-0.0627588	0.316045	0.212324	0.260231	0.18128	0.215812	0.007	0.018	0.026	0.07	0.006	0.027	1	1.01	0.99	1.01	1.14	1.16	1	1.11	1.11
P48570	Homocitrate synthase, cytosolic isozyme OS=Saccharomyces cerevisiae (strain ATCC 204508 / S288c) GN=LYS20 PE=1 SV=1	Homocitrate synthase, cytosolic isozyme	LYS20	0	0.0989081	0.0382895	0.202082	0.260472	0.0957541	0.202082	-0.332556	0	0.04194	0.0176908	-0.00666468	0.156691	0.166841	0.151543	0.136266	0	0.135976	0.0212264	0.389757	0.273669	0.293465	0.263799	0.209806	0.035	0.015	0.051	0.052	0.011	0.029	1.03	1.01	1.04	1.11	1.11	1.19	1.03	1.14	1.11
P00924	Enolase 1 OS=Saccharomyces cerevisiae (strain ATCC 204508 / S288c) GN=ENO1 PE=1 SV=3	Enolase 1	ENO1	0	-0.330428	-0.109288	-0.261141	0.0283287	-0.0429944	-0.123989	-0.281861	0	-0.25573	0.236451	-0.279326	0.139932	0.310414	0.0418188	9.78e-05	0	-0.285902	0.0323954	-0.00397491	0.0670176	0.135087	0.0438841	0.342169	0.114	0.169	0.117	0.04	0.12	0.108	0.91	1.01	0.95	0.94	1.09	1.13	0.95	1.06	1.11
P34167	Eukaryotic translation initiation factor 4B OS=Saccharomyces cerevisiae (strain ATCC 204508 / S288c) GN=TIF3 PE=1 SV=1	Eukaryotic translation initiation factor 4B	TIF3	0	0.0996138	0.00934543	0.16536	0.338359	0.0796516	0.126702	-0.526889	0	-0.0199944	0.0332896	0.0353062	0.119309	0.251818	0.228552	0.195502	0	-0.0106338	-0.0399469	0.0906241	0.215779	0.202749	0.110387	0.0801703	0.039	0.019	0.014	0.023	0.02	0.045	1.03	1	0.99	1.07	1.17	1.1	1.01	1.11	1.11
Q08742	Thiosulfate sulfurtransferase RDL2, mitochondrial OS=Saccharomyces cerevisiae (strain ATCC 204508 / S288c) GN=RDL2 PE=1 SV=1	Thiosulfate sulfurtransferase RDL2, mitochondrial	RDL2	0	-0.0523456	0.144664	0.0501155	0.197264	0.110026	0.148379	0.00246544	0	-0.212638	0.193012	0.0281085	0.191299	0.153959	0.110197	0.168837	0	0.107779	0.0941487	0.351268	0.174957	0.218932	0.230149	0.343741	0.072	0.14	0.04	0.019	0.021	0.048	1.02	1	1.05	1.09	1.11	1.2	1.02	1.13	1.11
P40106	Glycerol-1-phosphate phosphohydrolase 2 OS=Saccharomyces cerevisiae (strain ATCC 204508 / S288c) GN=GPP2 PE=1 SV=1	Glycerol-1-phosphate phosphohydrolase 2	GPP2	0	0.00790039	-0.00993672	0.228478	0.130364	0.0565327	0.0272482	-0.360057	0	0.0139244	0.201152	0.201003	0.127151	0.408839	0.209882	0.188929	0	-0.0666609	-0.0592515	0.355251	0.130376	0.118389	0.132591	0.194254	0.006	0.079	0.025	0.014	0.086	0.028	1	1.05	0.97	1.03	1.21	1.11	1.01	1.12	1.11
P38075	Pyridoxamine 5'-phosphate oxidase OS=Saccharomyces cerevisiae (strain ATCC 204508 / S288c) GN=PDX3 PE=1 SV=1	Pyridoxamine 5'-phosphate oxidase	PDX3	0	-0.0599177	-0.0432962	0.0313899	0.21839	0.107159	0.158506	-0.0106169	0	-0.100768	0.0774468	-0.131747	0.160424	0.302069	0.093946	0.198395	0	0.0947565	0.0261297	0.253586	0.0684149	0.0604899	0.110194	0.140582	0.022	0.062	0.034	0.025	0.072	0.028	0.98	1	1.03	1.1	1.15	1.07	1	1.11	1.11
P40893	Regulation of enolase protein 1 OS=Saccharomyces cerevisiae (strain ATCC 204508 / S288c) GN=REE1 PE=1 SV=1	Regulation of enolase protein 1	REE1	0	-0.146642	-0.127984	0.031719	0.0837398	-0.0131903	-0.00407262	-0.213916	0	0.0281533	0.0553143	0.208617	0.147394	0.252261	0.205351	0.156723	0	-0.0205663	-0.071187	0.218405	0.151809	0.136161	0.130181	0.15917	0.056	0.019	0.025	0.004	0.033	0.011	0.94	1.02	0.98	0.99	1.15	1.1	0.98	1.08	1.11
P13663	Aspartate-semialdehyde dehydrogenase OS=Saccharomyces cerevisiae (strain ATCC 204508 / S288c) GN=HOM2 PE=1 SV=1	Aspartate-semialdehyde dehydrogenase	HOM2	0	-0.130446	-0.150563	0.134498	0.00756425	-0.0583128	-0.0854673	-0.182191	0	0.0301219	0.318019	0.26887	0.162289	0.38365	0.236891	0.228289	0	0.00438393	-0.123094	0.456089	0.0940195	0.166723	0.105272	0.32197	0.057	0.126	0.049	0.013	0.062	0.079	0.94	1.09	0.97	0.95	1.22	1.15	1	1.11	1.11
Q3E764	Translation machinery-associated protein 7 OS=Saccharomyces cerevisiae (strain ATCC 204508 / S288c) GN=TMA7 PE=1 SV=1	Translation machinery-associated protein 7	TMA7	0	0.271898	0.125434	0.380117	0.342196	0.243771	0.232957	0.896649	0	-0.122051	-0.0420334	-0.00622747	0.260789	0.125876	-0.00207284	0.163351	0	0.17267	-0.100272	0.262175	0.132812	0.274155	0.207893	0.157044	0.095	0.043	0.097	0.005	0.059	0.041	1.1	0.96	1.02	1.18	1.07	1.16	1.03	1.14	1.11
P13517	F-actin-capping protein subunit beta OS=Saccharomyces cerevisiae (strain ATCC 204508 / S288c) GN=CAP2 PE=1 SV=3	F-actin-capping protein subunit beta	CAP2	0	0.168053	0.0208989	0.120435	0.346419	0.124302	0.14158	-0.859692	0	-0.0361692	-0.0338578	-0.045452	0.156958	0.282208	0.125249	0.152229	0	0.0143591	-0.071225	0.144082	0.299347	0.219079	0.209258	-0.0276049	0.065	0.014	0.032	0.008	0.059	0.094	1.05	0.98	0.99	1.1	1.14	1.1	1.01	1.11	1.11
E7KDM2	Cruciform DNA-recognizing protein 1 OS=Saccharomyces cerevisiae (strain AWRI796) GN=CRP1 PE=3 SV=2	Cruciform DNA-recognizing protein 1	CRP1	0	0.154245	0.120866	0.141917	0.35258	0.211863	0.271324	-0.301026	0	0.00856928	-0.240215	-0.124452	0.0611675	-0.0195036	0.0560587	0.173815	0	0.0926065	-0.0447695	0.0830098	0.199499	0.240459	0.12435	0.103828	0.055	0.095	0.049	0.029	0.068	0.052	1.07	0.95	1.01	1.18	1.05	1.12	1.01	1.12	1.11
P50107	Lactoylglutathione lyase OS=Saccharomyces cerevisiae (strain ATCC 204508 / S288c) GN=GLO1 PE=1 SV=1	Lactoylglutathione lyase	GLO1	0	0.225019	0.12733	0.373568	0.386355	0.198493	0.279948	0.112459	0	0.0207052	-0.0550863	-0.0109904	0.119995	0.150612	0.0942603	0.177292	0	0.0434743	-0.0738877	0.226808	0.183382	0.190293	0.155676	0.116538	0.078	0.027	0.041	0.04	0.029	0.026	1.09	0.99	0.99	1.18	1.1	1.11	1.02	1.13	1.11
P34227	Mitochondrial peroxiredoxin PRX1 OS=Saccharomyces cerevisiae (strain ATCC 204508 / S288c) GN=PRX1 PE=1 SV=1	Mitochondrial peroxiredoxin PRX1	PRX1	0	-0.155366	-0.187967	0.085532	0.0635429	-0.0239968	-0.0253054	-0.201216	0	-0.0402027	0.205994	-0.0902288	0.181943	0.302771	0.110292	0.118837	0	-0.205044	-0.0921772	0.0756811	0.119995	0.131761	0.100289	0.146118	0.071	0.094	0.071	0.001	0.077	0.016	0.93	1.04	0.94	0.98	1.13	1.09	0.97	1.07	1.11
P38137	Peroxisomal-coenzyme A synthetase OS=Saccharomyces cerevisiae (strain ATCC 204508 / S288c) GN=PCS60 PE=1 SV=1	Peroxisomal-coenzyme A synthetase	PCS60	0	0.00214953	0.0266417	0.222188	0.275291	0.106403	0.123947	0.266377	0	0.0286425	-0.0150413	-0.0900369	0.194732	0.271117	0.160333	0.207099	0	0.105186	-0.0295191	0.250424	0.253491	0.106034	0.165454	0.154011	0.01	0.015	0.05	0.009	0.039	0.022	1.01	1	1.02	1.08	1.16	1.1	1.01	1.12	1.1
P47176	Branched-chain-amino-acid aminotransferase, cytosolic OS=Saccharomyces cerevisiae (strain ATCC 204508 / S288c) GN=BAT2 PE=1 SV=1	Branched-chain-amino-acid aminotransferase, cytosolic	BAT2	0	-0.0123308	0.185529	0.0251042	0.174692	0.184179	-0.0286766	-0.375675	0	0.203224	0.476438	0.273018	0.283793	0.581474	0.410129	0.33649	0	0.0660085	-0.0226915	0.278412	0.122526	0.112565	0.262734	0.230859	0.078	0.167	0.032	0.104	0.088	0.054	1.04	1.18	1.01	1.06	1.36	1.15	1.08	1.19	1.1
P28241	Isocitrate dehydrogenase [NAD] subunit 2, mitochondrial OS=Saccharomyces cerevisiae (strain ATCC 204508 / S288c) GN=IDH2 PE=1 SV=1	Isocitrate dehydrogenase [NAD] subunit 2, mitochondrial	IDH2	0	-0.0412747	0.0131614	0.464157	0.129131	0.0871975	0.117841	-0.374346	0	-0.0486131	0.303287	0.00329645	0.145428	0.447766	0.0981883	0.093978	0	-0.0905501	-0.146508	0.325158	0.067076	0.0850029	0.0520662	0.197584	0.02	0.136	0.052	0.015	0.146	0.054	0.99	1.07	0.95	1.07	1.17	1.08	1	1.11	1.1
P53301	Probable glycosidase CRH1 OS=Saccharomyces cerevisiae (strain ATCC 204508 / S288c) GN=CRH1 PE=1 SV=1	Probable glycosidase CRH1	CRH1	0	0.0094397	-0.167165	0.175177	0.129734	0.0343144	-0.0711788	-0.947307	0	-0.102982	0.183581	0.431509	-0.0304377	0.137777	-0.132392	0.243323	0	-0.0151069	0.133856	0.564785	0.247928	0.353637	0.120094	0.554589	0.067	0.102	0.058	0.052	0.13	0.149	0.97	1.02	1.03	0.99	1.07	1.28	1.01	1.11	1.1
P50263	Protein SIP18 OS=Saccharomyces cerevisiae (strain ATCC 204508 / S288c) GN=SIP18 PE=1 SV=1	Protein SIP18	SIP18	0	0.399392	-0.0497284	0.367855	0.330029	0.178399	0.179331	0.225629	0	0.21186	0.212753	0.440129	0.185329	0.420937	0.580571	0.217846	0	0.200206	0.136142	0.0821596	0.261925	0.237117	0.0716923	0.322563	0.178	0.083	0.07	0	0.125	0.087	1.1	1.11	1.08	1.13	1.33	1.16	1.09	1.21	1.1
P21954	Isocitrate dehydrogenase [NADP], mitochondrial OS=Saccharomyces cerevisiae (strain ATCC 204508 / S288c) GN=IDP1 PE=1 SV=1	Isocitrate dehydrogenase [NADP], mitochondrial	IDP1	0	0.121378	0.135416	0.290263	0.322272	0.136852	0.223662	-0.125009	0	-0.0177687	0.0652816	0.0244804	0.126481	0.226514	0.157479	0.204512	0	0.0163963	-0.0465607	0.240616	0.197355	0.22195	0.129372	0.0776646	0.051	0.031	0.023	0.043	0.024	0.051	1.06	1.01	0.99	1.13	1.15	1.11	1.02	1.13	1.1
P39929	Vacuolar-sorting protein SNF7 OS=Saccharomyces cerevisiae (strain ATCC 204508 / S288c) GN=SNF7 PE=1 SV=1	Vacuolar-sorting protein SNF7	SNF7	0	-0.0150605	0.107387	0.15328	0.367556	0.104931	0.233054	-1.22048	0	0.0347412	0.0362328	-0.171327	0.153582	0.251437	0.0836508	0.18216	0	0.0318946	-0.0839871	0.314079	0.113907	0.143655	0.0832735	0.135648	0.047	0.014	0.041	0.063	0.058	0.023	1.02	1.02	0.99	1.13	1.13	1.09	1.01	1.11	1.1
P04802	Aspartate--tRNA ligase, cytoplasmic OS=Saccharomyces cerevisiae (strain ATCC 204508 / S288c) GN=DPS1 PE=1 SV=3	Aspartate--tRNA ligase, cytoplasmic	DPS1	0	-0.0263224	-0.0424083	0.16642	0.182992	0.0158108	0.0680983	-0.359052	0	0.0598517	0.146679	0.100817	0.166332	0.249613	0.151953	0.256871	0	0.000732704	-0.0154734	0.368219	0.140598	0.173695	0.0963808	0.322567	0.015	0.051	0.006	0.026	0.04	0.081	0.98	1.05	1	1.03	1.16	1.15	1.01	1.11	1.1
P09938	Ribonucleoside-diphosphate reductase small chain 1 OS=Saccharomyces cerevisiae (strain ATCC 204508 / S288c) GN=RNR2 PE=1 SV=2	Ribonucleoside-diphosphate reductase small chain 1	RNR2	0	0.0216598	-0.0262207	0.146789	0.242473	0.101579	0.0955217	-0.997718	0	-0.0331576	0.0989989	0.0142069	0.126965	0.235781	0.120924	0.109179	0	0.0101988	-0.0491596	0.233095	0.180338	0.234062	0.0956038	0.198703	0.017	0.048	0.022	0.003	0.049	0.049	1	1.02	0.99	1.07	1.11	1.13	1	1.11	1.1
P22803	Thioredoxin-2 OS=Saccharomyces cerevisiae (strain ATCC 204508 / S288c) GN=TRX2 PE=1 SV=3	Thioredoxin-2	TRX2	0	0.0613786	0.00250068	0.180774	0.251307	0.153912	0.142859	-0.20717	0	0.0735738	0.361443	0.261522	0.221363	0.42242	0.251923	0.113075	0	0.00778522	-0.0159443	0.286665	0.105346	0.179381	0.0695295	0.289462	0.024	0.136	0.008	0.005	0.108	0.076	1.02	1.11	1	1.11	1.2	1.13	1.04	1.15	1.1
P09201	Fructose-1,6-bisphosphatase OS=Saccharomyces cerevisiae (strain ATCC 204508 / S288c) GN=FBP1 PE=1 SV=2	Fructose-1,6-bisphosphatase	FBP1	0	0.0490349	-0.0189267	0.177449	0.172364	0.0981231	0.0177044	-0.0955261	0	0.157541	0.225653	0.0785178	0.155752	0.427226	0.208963	0.215693	0	0.0942572	-0.0605267	0.377285	0.098796	0.216836	0.153735	0.301119	0.024	0.079	0.054	0.039	0.088	0.051	1.01	1.09	1.01	1.04	1.22	1.17	1.04	1.14	1.1
P21734	Ubiquitin-conjugating enzyme E2 1 OS=Saccharomyces cerevisiae (strain ATCC 204508 / S288c) GN=UBC1 PE=1 SV=1	Ubiquitin-conjugating enzyme E2 1	UBC1	0	-0.0506808	-0.00383594	0.0445102	0.272834	0.109157	0.219215	-1.06343	0	0.253143	0.330773	0.6584	0.261978	0.329092	0.157905	0.325725	0	0.0351894	0.203182	0.519685	0.0695409	0.0947782	0.101019	0.530515	0.019	0.116	0.077	0.054	0.066	0.181	0.99	1.15	1.06	1.12	1.21	1.19	1.07	1.17	1.1
P30952	Malate synthase 1, glyoxysomal OS=Saccharomyces cerevisiae (strain ATCC 204508 / S288c) GN=MLS1 PE=1 SV=1	Malate synthase 1, glyoxysomal	MLS1	0	0.0301898	0.117586	-0.0681406	0.332356	0.203794	0.25937	0.134634	0	-0.0536615	-0.0412581	-0.176887	0.147016	0.0802584	0.137753	0.134787	0	-0.100074	0.0325974	-0.108117	0.142248	0.168056	-0.0802184	0.102194	0.043	0.02	0.047	0.027	0.022	0.087	1.04	0.98	0.99	1.17	1.09	1.05	1	1.1	1.1
P00724	Invertase 2 OS=Saccharomyces cerevisiae (strain ATCC 204508 / S288c) GN=SUC2 PE=1 SV=1	Invertase 2	SUC2	0	0.0439354	0.0309986	0.203261	0.175549	0.0618541	0.100014	-0.292164	0	0.0361778	0.102967	0.189895	0.13868	0.26112	0.210094	0.14973	0	0.0206976	-0.0796222	0.311944	0.178062	0.205029	0.182661	0.166921	0.016	0.036	0.036	0.019	0.039	0.013	1.02	1.03	0.99	1.06	1.15	1.14	1.01	1.12	1.1
Q12497	Protein FMP16, mitochondrial OS=Saccharomyces cerevisiae (strain ATCC 204508 / S288c) GN=FMP16 PE=1 SV=1	Protein FMP16, mitochondrial	FMP16	0	-0.0446593	0.0309141	-0.0514917	0.311924	0.097854	0.0964048	0.243002	0	0.0024098	0.0346383	-0.00846614	0.134454	0.320256	0.0949171	0.102238	0	-0.116328	-0.08812	0.218478	0.0230787	0.105131	-0.170273	0.297201	0.026	0.013	0.042	0.001	0.091	0.16	1	1.01	0.95	1.07	1.13	1.06	0.99	1.09	1.1
P38715	NADPH-dependent aldose reductase GRE3 OS=Saccharomyces cerevisiae (strain ATCC 204508 / S288c) GN=GRE3 PE=1 SV=1	NADPH-dependent aldose reductase GRE3	GRE3	0	-0.0434941	0.0640554	0.122977	0.214244	0.0753173	0.11398	-0.377527	0	-0.0386086	0.0234211	-0.0230298	0.0973732	0.179929	0.142439	0.0478434	0	-0.0393529	-0.0984848	0.341369	0.0995086	0.185173	0.128579	0.166451	0.038	0.022	0.034	0.019	0.047	0.02	1.01	1	0.97	1.07	1.09	1.12	0.99	1.09	1.1
P28707	Co-chaperone protein SBA1 OS=Saccharomyces cerevisiae (strain ATCC 204508 / S288c) GN=SBA1 PE=1 SV=3	Co-chaperone protein SBA1	SBA1	0	0.0703202	0.0986003	-0.289883	0.186648	0.00289892	0.137811	-1.83864	0	-0.0425884	-0.0517423	-0.136851	0.027252	-0.0648511	0.151257	0.244734	0	0.0264273	-0.0865062	-0.334827	0.189926	0.287844	0.214397	0.204573	0.035	0.019	0.041	0.066	0.108	0.032	1.04	0.98	0.99	1.05	1.08	1.18	1	1.1	1.1
Q01976	ADP-ribose pyrophosphatase OS=Saccharomyces cerevisiae (strain ATCC 204508 / S288c) GN=YSA1 PE=1 SV=2	ADP-ribose pyrophosphatase	YSA1	0	-0.0324804	0.0303314	0.204052	0.255653	0.0276806	0.1749	-1.32131	0	-0.0453843	0.0739105	-0.0460488	0.175451	0.205687	0.102254	0.115863	0	-0.00629606	-0.0503184	0.128624	0.246335	0.184105	0.176898	0.137952	0.022	0.042	0.019	0.072	0.039	0.017	1	1.01	0.99	1.07	1.1	1.12	1	1.1	1.1
P12709	Glucose-6-phosphate isomerase OS=Saccharomyces cerevisiae (strain ATCC 204508 / S288c) GN=PGI1 PE=1 SV=3	Glucose-6-phosphate isomerase	PGI1	0	-0.132176	-0.113207	0.130229	0.0763748	-0.0347104	-0.0822681	-0.301146	0	0.0851291	0.397755	0.396816	0.237435	0.5004	0.195535	0.137715	0	-0.0185283	-0.100261	0.559764	0.174092	0.213209	0.146765	0.330994	0.05	0.15	0.037	0.023	0.139	0.065	0.95	1.13	0.97	0.96	1.22	1.17	1.02	1.12	1.1
P38088	Glycine--tRNA ligase 1, mitochondrial OS=Saccharomyces cerevisiae (strain ATCC 204508 / S288c) GN=GRS1 PE=1 SV=3	Glycine--tRNA ligase 1, mitochondrial	GRS1	0	0.0722267	0.0718474	0.226814	0.363951	0.101649	0.246077	-1.86284	0	-0.0175057	0.0747304	-0.00857541	0.099909	0.228721	0.1161	0.0766282	0	0.0246356	-0.0268494	0.278565	0.179012	0.20304	0.162653	0.134657	0.029	0.034	0.018	0.071	0.055	0.024	1.03	1.01	1	1.13	1.1	1.12	1.02	1.12	1.1
Q12305	Thiosulfate sulfurtransferase RDL1, mitochondrial OS=Saccharomyces cerevisiae (strain ATCC 204508 / S288c) GN=RDL1 PE=1 SV=1	Thiosulfate sulfurtransferase RDL1, mitochondrial	RDL1	0	-0.21383	-0.0639631	-0.16291	0.157723	-0.0362024	-0.014797	-0.697551	0	-0.128223	-0.0101395	-0.610813	0.163576	0.146725	0.0579985	0.0704237	0	-0.128733	0.0404791	-0.145934	0.182468	0.158148	0.202993	0.180745	0.075	0.049	0.06	0.01	0.034	0.016	0.94	0.97	0.98	0.98	1.07	1.13	0.96	1.06	1.1
P40052	Uncharacterized protein YER079W OS=Saccharomyces cerevisiae (strain ATCC 204508 / S288c) GN=YER079W PE=1 SV=1	Uncharacterized protein YER079W	YER079W	0	0.102546	0.0329325	0.212045	0.384782	0.161883	0.302284	0.307421	0	-0.20009	-0.250284	-0.212258	0.058321	0.0741512	-0.00679627	0.0640976	0	0.114959	0.0906319	0.247218	0.257828	0.195907	0.15789	-0.0315216	0.037	0.094	0.042	0.069	0.03	0.083	1.03	0.9	1.05	1.18	1.03	1.08	1	1.1	1.1
P13298	Orotate phosphoribosyltransferase 1 OS=Saccharomyces cerevisiae (strain ATCC 204508 / S288c) GN=URA5 PE=1 SV=2	Orotate phosphoribosyltransferase 1	URA5	0	-0.139578	-0.0245038	0.117635	0.192119	0.000323922	0.0601717	-0.346981	0	-0.0957608	0.273404	0.203249	0.127666	0.251883	0.110129	0.134521	0	0.0838585	0.00377815	0.381436	0.157933	0.179118	0.278969	0.306401	0.051	0.136	0.033	0.029	0.053	0.046	0.96	1.05	1.02	1.02	1.12	1.19	1.01	1.11	1.1
P07284	Serine--tRNA ligase, cytoplasmic OS=Saccharomyces cerevisiae (strain ATCC 204508 / S288c) GN=SES1 PE=1 SV=2	Serine--tRNA ligase, cytoplasmic	SES1	0	-0.237075	0.0694429	0.148231	0.169993	-0.0238073	0.196842	-1.65985	0	0.0691663	0.317186	0.231106	0.164023	0.314708	0.224487	0.165361	0	0.0432627	0.135647	0.452963	0.293768	0.297876	0.317	0.0783741	0.108	0.118	0.048	0.108	0.052	0.089	0.97	1.1	1.04	1.06	1.18	1.18	1.04	1.14	1.1
P43619	Nicotinate-nucleotide pyrophosphorylase [carboxylating] OS=Saccharomyces cerevisiae (strain ATCC 204508 / S288c) GN=BNA6 PE=1 SV=1	Nicotinate-nucleotide pyrophosphorylase [carboxylating]	BNA6	0	-0.146086	0.0124454	-0.0365135	-0.0125537	-0.0770147	-0.157301	-0.511623	0	0.113088	0.216689	0.130816	0.187893	0.364247	0.335453	0.213438	0	0.00148349	-0.0974698	0.319551	0.152003	0.332575	0.131148	0.233797	0.06	0.075	0.039	0.039	0.055	0.07	0.97	1.08	0.98	0.92	1.24	1.18	1.01	1.11	1.1
P00498	ATP phosphoribosyltransferase OS=Saccharomyces cerevisiae (strain ATCC 204508 / S288c) GN=HIS1 PE=1 SV=1	ATP phosphoribosyltransferase	HIS1	0	0.0519331	0.0257551	0.201719	0.24009	0.0947232	0.133529	-0.0817425	0	0.0201193	0.118461	0.0309012	0.0935578	0.303407	0.0911823	0.112422	0	0.0124655	-0.0166659	0.410058	0.21019	0.216858	0.185632	0.191125	0.018	0.044	0.01	0.019	0.083	0.012	1.02	1.03	1	1.08	1.13	1.15	1.02	1.12	1.1
P48164	40S ribosomal protein S7-B OS=Saccharomyces cerevisiae (strain ATCC 204508 / S288c) GN=RPS7B PE=1 SV=1	40S ribosomal protein S7-B	RPS7B	0	0.0372197	0.00743872	0.0817484	0.331015	-0.0390566	0.126083	-1.41919	0	-0.0644634	0.0372527	-0.0142776	0.170048	0.214921	0.199925	0.0727236	0	0.0527895	-0.126537	0.338743	0.275065	0.214031	0.216523	0.116485	0.014	0.036	0.063	0.081	0.053	0.039	1.01	0.99	0.98	1.03	1.12	1.14	1	1.1	1.1
P47119	Inosine triphosphate pyrophosphatase OS=Saccharomyces cerevisiae (strain ATCC 204508 / S288c) GN=HAM1 PE=1 SV=1	Inosine triphosphate pyrophosphatase	HAM1	0	0.133018	0.0260371	0.299707	0.229813	0.0619869	0.153832	-1.27122	0	0.0579428	0.0915145	0.185236	0.106128	0.402083	0.245638	0.247592	0	-0.229942	-0.186643	0.220484	-0.0108222	0.00410148	-0.0731902	-0.051213	0.049	0.032	0.086	0.045	0.063	0.028	1.04	1.04	0.91	1.08	1.23	0.97	0.99	1.09	1.1
P07267	Saccharopepsin OS=Saccharomyces cerevisiae (strain ATCC 204508 / S288c) GN=PEP4 PE=1 SV=1	Saccharopepsin	PEP4	0	0.215371	0.0472409	0.354039	0.303323	0.157278	0.258002	-1.10457	0	0.317515	0.0925052	0.405678	0.317335	0.387407	0.278759	0.125643	0	0.274655	-0.013631	0.579616	0.194645	0.34342	0.214892	0.220958	0.08	0.115	0.116	0.049	0.09	0.051	1.06	1.1	1.07	1.16	1.2	1.2	1.08	1.19	1.1
P17536	Tropomyosin-1 OS=Saccharomyces cerevisiae (strain ATCC 204508 / S288c) GN=TPM1 PE=1 SV=1	Tropomyosin-1	TPM1	0	-0.0292018	-0.0329827	0.114547	0.204499	0.0556315	0.103881	-2.39079	0	-0.153251	0.00393419	-0.178685	0.134229	0.0919289	0.0463727	0.110638	0	-0.227223	-0.0889491	0.0945856	0.0540246	0.0863464	0.0348027	0.110546	0.013	0.061	0.079	0.024	0.023	0.027	0.99	0.97	0.93	1.06	1.06	1.06	0.96	1.06	1.1
P10664	60S ribosomal protein L4-A OS=Saccharomyces cerevisiae (strain ATCC 204508 / S288c) GN=RPL4A PE=1 SV=4	60S ribosomal protein L4-A	RPL4A	0	0.0104388	0.0463483	0.330933	0.261317	0.0218435	0.0662456	-1.62007	0	0.0281654	0.167556	0.150074	0.157882	0.334747	0.141253	0.0605921	0	0.133198	-0.0232212	0.629203	0.283524	0.336933	0.315646	0.232969	0.017	0.063	0.059	0.022	0.099	0.038	1.01	1.05	1.03	1.03	1.14	1.23	1.03	1.13	1.1
A6ZY20	Cell wall mannoprotein PST1 OS=Saccharomyces cerevisiae (strain YJM789) GN=PST1 PE=3 SV=1	Cell wall mannoprotein PST1	PST1	0	-0.153959	-0.0398229	-0.102861	0.157151	0.0417995	0.0293391	-0.237289	0	-0.0728104	0.239284	0.273783	0.287061	0.33384	0.297487	0.243074	0	0.0831625	0.0223882	0.0204267	0.193474	0.215931	-0.0437928	0.13061	0.055	0.116	0.03	0.006	0.032	0.09	0.96	1.04	1.02	1.02	1.22	1.08	1.01	1.11	1.1
Q07648	D-tyrosyl-tRNA(Tyr) deacylase OS=Saccharomyces cerevisiae (strain ATCC 204508 / S288c) GN=DTD1 PE=1 SV=1	D-tyrosyl-tRNA(Tyr) deacylase	DTD1	0	0.0114663	0.11342	0.130046	0.440508	0.142019	0.19757	0.294953	0	0.193068	0.241138	0.401	0.161623	0.0965976	0.302837	0.480823	0	-0.07322	-0.00743659	0.0793682	0.291191	0.10718	0.18346	-0.00417836	0.044	0.086	0.028	0.027	0.132	0.065	1.03	1.11	0.98	1.13	1.23	1.07	1.04	1.14	1.1
P25491	Mitochondrial protein import protein MAS5 OS=Saccharomyces cerevisiae (strain ATCC 204508 / S288c) GN=YDJ1 PE=1 SV=1	Mitochondrial protein import protein MAS5	YDJ1	0	0.038227	-0.00729646	0.169064	0.245714	0.0584335	0.0907597	-0.823646	0	0.03377	0.133931	0.00394796	0.166501	0.376186	0.248893	0.146486	0	-0.0392393	0.0369837	0.060724	0.247621	0.237418	0.176477	-0.0307102	0.017	0.049	0.026	0.016	0.08	0.095	1.01	1.04	1	1.05	1.2	1.1	1.02	1.12	1.1
P36156	Glutathione S-transferase omega-like 2 OS=Saccharomyces cerevisiae (strain ATCC 204508 / S288c) GN=ECM4 PE=1 SV=1	Glutathione S-transferase omega-like 2	ECM4	0	-0.00692796	0.00610853	-0.0485964	0.291354	0.109846	0.165662	0.0588147	0	-0.0898731	-0.0944986	-0.186706	0.127814	0.0208503	0.128132	0.143927	0	-0.0630963	-0.0165293	0.000210689	0.123317	0.128723	0.100701	0.0132137	0.005	0.037	0.023	0.027	0.046	0.041	1	0.96	0.98	1.1	1.07	1.06	0.98	1.08	1.1
P53141	Myosin light chain 1 OS=Saccharomyces cerevisiae (strain ATCC 204508 / S288c) GN=MLC1 PE=1 SV=1	Myosin light chain 1	MLC1	0	0.00424281	-0.0752982	0.049561	0.16649	0.0277747	0.0324907	-0.422516	0	0.0500933	0.121609	0.137343	0.219616	0.0771196	0.216391	0.229436	0	-0.00931457	-0.138538	0.157752	0.243579	0.231767	0.0768359	0.233294	0.031	0.043	0.053	0.002	0.058	0.061	0.98	1.04	0.97	1.02	1.13	1.13	1	1.1	1.1
P27796	3-ketoacyl-CoA thiolase, peroxisomal OS=Saccharomyces cerevisiae (strain ATCC 204508 / S288c) GN=POT1 PE=1 SV=1	3-ketoacyl-CoA thiolase, peroxisomal	POT1	0	-0.299808	0.0579051	-0.487362	0.187129	0.00643104	0.0433846	-0.0075393	0	-0.137504	0.1265	-0.607884	0.221183	0.1265	-0.0202375	0.132302	0	-0.250656	0.0836733	-0.292782	0.0248653	0.156902	0.202155	0.160809	0.128	0.091	0.117	0.018	0.059	0.017	0.95	1	0.97	1.02	1.06	1.13	0.97	1.07	1.1
Q05584	Hydroxyacylglutathione hydrolase, cytoplasmic isozyme OS=Saccharomyces cerevisiae (strain ATCC 204508 / S288c) GN=GLO2 PE=1 SV=1	Hydroxyacylglutathione hydrolase, cytoplasmic isozyme	GLO2	0	0.159938	0.114905	0.249669	0.312607	0.108967	0.248373	0.00665782	0	0.0552109	0.183251	0.274876	0.165338	0.425896	0.254754	0.28467	0	0.135451	0.036081	0.249415	0.158406	0.111243	0.202145	0.0533295	0.057	0.066	0.049	0.068	0.064	0.052	1.07	1.06	1.04	1.13	1.25	1.09	1.06	1.16	1.1
P16120	Threonine synthase OS=Saccharomyces cerevisiae (strain ATCC 204508 / S288c) GN=THR4 PE=1 SV=1	Threonine synthase	THR4	0	-0.195856	-0.0752121	0.032908	0.0542437	-0.0765784	-0.0350511	-0.722593	0	-0.099282	0.401306	0.0475395	0.163024	0.488728	0.154727	0.0599319	0	-0.129165	-0.080245	0.208631	0.132536	0.147336	0.143926	0.199108	0.068	0.191	0.045	0.02	0.161	0.022	0.94	1.08	0.95	0.96	1.19	1.12	0.99	1.09	1.1
P00044	Cytochrome c iso-1 OS=Saccharomyces cerevisiae (strain ATCC 204508 / S288c) GN=CYC1 PE=1 SV=2	Cytochrome c iso-1	CYC1	0	0.0614975	0.327502	0.303192	0.443264	0.15014	0.237603	0.531231	0	-0.0664189	0.160337	-0.146783	0.0463107	0.198314	0.0866034	0.178375	0	0.0604232	-0.077317	0.282647	0.239393	0.211953	0.0908708	0.34713	0.124	0.082	0.048	0.043	0.041	0.089	1.1	1.02	1	1.14	1.11	1.17	1.04	1.14	1.1
P36046	Mitochondrial intermembrane space import and assembly protein 40 OS=Saccharomyces cerevisiae (strain ATCC 204508 / S288c) GN=MIA40 PE=1 SV=2	Mitochondrial intermembrane space import and assembly protein 40	MIA40	0	0.0948206	-0.0124004	0.351337	0.246607	0.0674649	0.199334	-0.922262	0	0.129114	-0.0820101	0.0424162	0.16736	0.224493	0.258488	0.197551	0	0.0215311	-0.140126	0.0220861	0.192258	0.0924754	0.0375397	-0.00961047	0.041	0.074	0.06	0.065	0.021	0.035	1.02	1.01	0.97	1.1	1.17	1.03	1	1.1	1.1
P21242	Probable proteasome subunit alpha type-7 OS=Saccharomyces cerevisiae (strain ATCC 204508 / S288c) GN=PRE10 PE=1 SV=2	Probable proteasome subunit alpha type-7	PRE10	0	0.102776	0.234925	0.464484	0.334585	0.182968	0.304729	-1.03147	0	0.176748	0.217353	0.0899287	0.242938	0.38291	0.259662	0.166143	0	-0.10257	-0.16265	0.301702	0.0165243	-0.00744481	-0.0131429	0.141997	0.082	0.078	0.057	0.06	0.076	0.062	1.08	1.1	0.94	1.19	1.21	1.03	1.04	1.14	1.1
P00817	Inorganic pyrophosphatase OS=Saccharomyces cerevisiae (strain ATCC 204508 / S288c) GN=IPP1 PE=1 SV=4	Inorganic pyrophosphatase	IPP1	0	0.0684894	0.0554364	0.309326	0.272892	0.133958	0.13158	-0.0112001	0	0.0158968	0.227918	0.149683	0.110992	0.506523	0.061376	0.0904194	0	-0.0187731	-0.0934259	0.310052	0.145023	0.128515	0.0822667	0.146486	0.025	0.09	0.034	0.001	0.18	0.023	1.03	1.06	0.97	1.1	1.18	1.09	1.02	1.12	1.1
P47096	3-hydroxyanthranilate 3,4-dioxygenase OS=Saccharomyces cerevisiae (strain ATCC 204508 / S288c) GN=BNA1 PE=1 SV=1	3-hydroxyanthranilate 3,4-dioxygenase	BNA1	0	0.127714	0.0995357	0.26039	0.32266	0.128272	0.242461	-0.248957	0	-0.00719191	-0.0115243	-0.188245	0.108784	0.237278	0.105121	-0.0425905	0	0.0566984	-0.0644019	0.348931	0.191898	0.223168	0.160665	0.12874	0.046	0.004	0.042	0.056	0.097	0.033	1.05	1	1	1.14	1.08	1.13	1.02	1.11	1.1
P28834	Isocitrate dehydrogenase [NAD] subunit 1, mitochondrial OS=Saccharomyces cerevisiae (strain ATCC 204508 / S288c) GN=IDH1 PE=1 SV=2	Isocitrate dehydrogenase [NAD] subunit 1, mitochondrial	IDH1	0	-0.270554	-0.090864	-0.224536	-0.00506505	-0.1019	-0.170544	-0.274881	0	-0.0691346	0.20891	0.0455777	0.188482	0.177645	0.143432	0.194452	0	-0.248874	0.0212882	0.0108823	0.117172	0.196623	0.0764087	0.323851	0.094	0.102	0.101	0.034	0.018	0.086	0.92	1.04	0.95	0.91	1.13	1.15	0.97	1.06	1.09
Q03940	RuvB-like protein 1 OS=Saccharomyces cerevisiae (strain ATCC 204508 / S288c) GN=RVB1 PE=1 SV=1	RuvB-like protein 1	RVB1	0	0.126576	0.159721	0.356748	0.193495	0.143717	0.196692	-0.989061	0	-0.137504	-0.41734	-0.468954	0	-0.0707345	-0.0349338	0.0273505	0	-0.00103754	-0.0538894	0.302927	0.0884996	0.243718	-0.0114542	0.222541	0.058	0.144	0.021	0.026	0.035	0.095	1.07	0.89	0.99	1.13	0.98	1.11	0.98	1.07	1.09
P17891	Clathrin light chain OS=Saccharomyces cerevisiae (strain ATCC 204508 / S288c) GN=CLC1 PE=1 SV=1	Clathrin light chain	CLC1	0	-0.0425909	0.0615765	-0.0932645	0.301848	0.077998	0.139609	-1.51959	0	-0.0870968	-0.0839895	-0.0943015	0.141839	-0.0480498	0.151235	0.184049	0	0.0218594	0.0464239	-0.192121	0.201202	0.177834	0.227453	0.0522052	0.036	0.035	0.016	0.03	0.085	0.062	1	0.96	1.02	1.08	1.07	1.11	0.99	1.09	1.09
Q08220	Glutathione synthetase OS=Saccharomyces cerevisiae (strain ATCC 204508 / S288c) GN=GSH2 PE=1 SV=1	Glutathione synthetase	GSH2	0	0.0093281	0.0191396	0.174642	0.193419	0.0237497	0.0680085	-0.150582	0	0.0350091	0.0763769	0.0059726	0.134063	0.266574	0.125426	0.205737	0	-0.00911755	-0.0593735	0.34501	0.137586	0.156329	0.134554	0.19535	0.007	0.027	0.022	0.022	0.049	0.021	1.01	1.03	0.98	1.03	1.15	1.12	1.01	1.1	1.09
P20081	FK506-binding protein 1 OS=Saccharomyces cerevisiae (strain ATCC 204508 / S288c) GN=FPR1 PE=1 SV=2	FK506-binding protein 1	FPR1	0	0.145963	-0.181393	0.455774	0.141269	0.0892155	0.0627771	-0.278674	0	-0.0609307	0.207832	-0.0232818	0.131502	0.265869	0.0967596	0.0372659	0	-0.354015	-0.247928	0.176834	0.015219	-0.0589881	0.0263898	0.143877	0.113	0.1	0.129	0.013	0.084	0.071	1	1.04	0.87	1.05	1.1	1.03	0.97	1.06	1.09
Q12449	Hsp90 co-chaperone AHA1 OS=Saccharomyces cerevisiae (strain ATCC 204508 / S288c) GN=AHA1 PE=1 SV=1	Hsp90 co-chaperone AHA1	AHA1	0	-0.163765	-0.00156857	0.0857789	0.0763307	-0.0405412	0.00723255	-0.681604	0	0.00856643	0.214473	0.153646	0.135737	0.262287	0.223139	0.178615	0	0.0936305	-0.0690057	0.480654	0.152737	0.192103	0.125475	0.298726	0.064	0.086	0.057	0.023	0.029	0.061	0.96	1.06	1.01	0.99	1.17	1.15	1.01	1.1	1.09
P01098	ATPase-stabilizing factor 9 kDa, mitochondrial OS=Saccharomyces cerevisiae (strain ATCC 204508 / S288c) GN=STF1 PE=1 SV=2	ATPase-stabilizing factor 9 kDa, mitochondrial	STF1	0	0.219491	0.272452	-0.210843	0.57883	0.288628	0.326366	0.548538	0	-0.135403	-0.533006	-0.281068	-0.0239789	-0.288205	-0.0299484	0.21983	0	0.167056	0.0533231	0.139763	0.244235	0.146171	0.208534	0.0668963	0.098	0.183	0.06	0.018	0.175	0.049	1.12	0.87	1.05	1.24	0.99	1.1	1.01	1.11	1.09
Q06151	m7GpppX diphosphatase OS=Saccharomyces cerevisiae (strain ATCC 204508 / S288c) GN=DCS1 PE=1 SV=1	m7GpppX diphosphatase	DCS1	0	0.099783	0.0914803	0.114534	0.263196	0.111103	0.196139	-0.218969	0	0.0233267	0.0263681	0.0207365	0.2061	0.134899	0.177725	0.19452	0	0.0519906	0.0526565	0.195577	0.261768	0.216825	0.174011	0.139114	0.038	0.01	0.021	0.042	0.021	0.027	1.05	1.01	1.02	1.11	1.12	1.13	1.03	1.12	1.09
P46969	Ribulose-phosphate 3-epimerase OS=Saccharomyces cerevisiae (strain ATCC 204508 / S288c) GN=RPE1 PE=1 SV=1	Ribulose-phosphate 3-epimerase	RPE1	0	0.0114462	-0.0526625	0.0650669	0.188689	-0.0696473	0.0913726	-0.121836	0	-0.0793518	-0.173934	-0.267424	0.0329983	0.0980739	0.0571799	0.034645	0	0.0345917	-0.0469492	0.280194	0.232981	0.212565	0.195256	0.193131	0.024	0.06	0.028	0.079	0.022	0.007	0.99	0.94	1	1.01	1.05	1.15	0.98	1.07	1.09
Q12480	Probable electron transfer flavoprotein subunit alpha, mitochondrial OS=Saccharomyces cerevisiae (strain ATCC 204508 / S288c) GN=AIM45 PE=1 SV=1	Probable electron transfer flavoprotein subunit alpha, mitochondrial	AIM45	0	0.0751744	0.332625	0.188445	0.256028	0.111342	0.253215	0.186972	0	0.0719727	0.113382	0.0340739	0.0748472	0.358599	0.212768	0.0942432	0	0.0211233	0.105293	0.0853752	0.153279	0.231483	0.358624	0.0542902	0.124	0.04	0.039	0.069	0.092	0.105	1.1	1.04	1.03	1.14	1.17	1.16	1.06	1.16	1.09
P0CX39	40S ribosomal protein S8-A OS=Saccharomyces cerevisiae (strain ATCC 204508 / S288c) GN=RPS8A PE=1 SV=1	40S ribosomal protein S8-A	RPS8A	0	0.116428	0.104049	0.44806	0.367886	0.0426216	0.16028	-3.46546	0	0.0720266	0.079588	0.0616307	0.277767	0.374366	0.315031	0.155156	0	0.0687334	-0.0246804	0.112938	0.357171	0.320154	0.0651785	-0.029921	0.044	0.03	0.034	0.058	0.077	0.128	1.05	1.04	1.01	1.07	1.22	1.09	1.03	1.13	1.09
P35176	Peptidyl-prolyl cis-trans isomerase D OS=Saccharomyces cerevisiae (strain ATCC 204508 / S288c) GN=CPR5 PE=2 SV=1	Peptidyl-prolyl cis-trans isomerase D	CPR5	0	-0.266515	0.0115416	-0.0106616	-0.0194436	0.00866486	-0.0814401	-0.401581	0	0.0268952	0.242201	0.01543	0.140321	0.49976	0.222392	0.264972	0	0.187544	-0.0378321	0.356144	-0.169077	0.00677323	0.172563	0.196459	0.105	0.094	0.085	0.044	0.106	0.07	0.95	1.07	1.04	0.98	1.26	1.09	1.02	1.11	1.09
P32598	Serine/threonine-protein phosphatase PP1-2 OS=Saccharomyces cerevisiae (strain ATCC 204508 / S288c) GN=GLC7 PE=1 SV=1	Serine/threonine-protein phosphatase PP1-2	GLC7	0	-0.301933	-0.134325	0.0324436	0.036327	-0.144181	-0.111588	-1.48881	0	0.0273475	0.094433	0.114143	0.0572748	0.255847	0.0926278	0.0665012	0	-0.177157	-0.0622371	0.531624	-0.0455969	0.166358	0.0596629	0.286881	0.104	0.034	0.062	0.016	0.072	0.079	0.91	1.03	0.95	0.92	1.1	1.13	0.96	1.05	1.09
P37302	Aminopeptidase Y OS=Saccharomyces cerevisiae (strain ATCC 204508 / S288c) GN=APE3 PE=1 SV=1	Aminopeptidase Y	APE3	0	-0.274062	-0.20014	-0.127689	0.124772	-0.0846624	-0.147712	-1.00228	0	0.281168	0.170314	0.349479	0.209228	0.333983	0.262227	0.184586	0	-0.122659	-0.0357151	0.103261	0.138683	0.186499	0.162064	0.165503	0.1	0.097	0.043	0.031	0.052	0.009	0.9	1.11	0.96	0.92	1.2	1.13	0.99	1.08	1.09
P00925	Enolase 2 OS=Saccharomyces cerevisiae (strain ATCC 204508 / S288c) GN=ENO2 PE=1 SV=2	Enolase 2	ENO2	0	-0.0226866	-0.072508	0.141674	0.138756	-0.00235282	-0.0533704	-0.18167	0	0.066256	0.299559	0.301445	0.215993	0.411996	0.180691	0.175429	0	-0.00195376	-0.025366	0.413698	0.16445	0.240231	0.137192	0.267381	0.026	0.112	0.01	0.025	0.096	0.047	0.98	1.09	0.99	0.98	1.2	1.16	1.02	1.11	1.09
P00890	Citrate synthase, mitochondrial OS=Saccharomyces cerevisiae (strain ATCC 204508 / S288c) GN=CIT1 PE=1 SV=2	Citrate synthase, mitochondrial	CIT1	0	-0.219366	-0.0780025	-0.127988	-0.0217363	-0.0284774	-0.186712	0.145312	0	-0.132955	0.255477	-0.162138	0.123444	0.378968	0.0533415	0.0890763	0	-0.0893164	-0.163108	0.268084	0.0896222	0.147328	0.0328119	0.275141	0.076	0.139	0.057	0.077	0.128	0.084	0.94	1.04	0.94	0.93	1.13	1.11	0.97	1.06	1.09
P32472	Peptidyl-prolyl cis-trans isomerase FPR2 OS=Saccharomyces cerevisiae (strain ATCC 204508 / S288c) GN=FPR2 PE=1 SV=1	Peptidyl-prolyl cis-trans isomerase FPR2	FPR2	0	0.0678783	0.00112054	0.00782556	0.195724	0.0838316	0.144924	-0.606989	0	-0.0249137	-0.0375338	0.0266967	0.0167433	0.217412	0.0453124	-0.00224719	0	0.0872224	0.0833701	0.310164	0.183934	0.169471	0.22064	0.275694	0.027	0.013	0.034	0.03	0.082	0.037	1.02	0.99	1.04	1.08	1.06	1.17	1.01	1.1	1.09
P32614	Fumarate reductase 1 OS=Saccharomyces cerevisiae (strain ATCC 204508 / S288c) GN=FRD1 PE=1 SV=1	Fumarate reductase 1	FRD1	0	-0.161625	-0.0848514	0.114949	0.0721846	-0.0826303	-0.0309089	-1.27267	0	-0.0616739	0.335914	0.237476	0.194412	0.372011	0.185009	0.142839	0	-0.0680804	-0.0532307	0.411593	0.119699	0.148762	0.116181	0.217144	0.056	0.154	0.025	0.025	0.086	0.036	0.95	1.07	0.97	0.96	1.18	1.12	1	1.09	1.09
P32775	1,4-alpha-glucan-branching enzyme OS=Saccharomyces cerevisiae (strain ATCC 204508 / S288c) GN=GLC3 PE=1 SV=2	1,4-alpha-glucan-branching enzyme	GLC3	0	-0.0592964	-0.0493834	0.0628745	0.0713204	-0.0434921	-0.0508298	-0.273222	0	0.0758057	0.159709	0.223564	0.199154	0.248335	0.205394	0.269478	0	0.0559655	-0.031535	0.378455	0.188479	0.212898	0.213348	0.210736	0.022	0.055	0.031	0.004	0.023	0.001	0.98	1.06	1.01	0.97	1.18	1.16	1.01	1.1	1.09
Q05515	Survival factor 1 OS=Saccharomyces cerevisiae (strain ATCC 204508 / S288c) GN=SVF1 PE=1 SV=1	Survival factor 1	SVF1	0	0.0642921	0.119004	0.287023	0.221506	0.205458	0.0808072	-1.00871	0	-0.0645307	0.172043	-0.152329	0.0131487	0.192095	0.0923754	0.129073	0	0.128607	0.16466	0.396815	0.421306	0.381011	0.252898	0.207534	0.041	0.086	0.059	0.061	0.035	0.063	1.04	1.03	1.07	1.11	1.1	1.22	1.05	1.14	1.09
Q12122	Homocitrate synthase, mitochondrial OS=Saccharomyces cerevisiae (strain ATCC 204508 / S288c) GN=LYS21 PE=1 SV=1	Homocitrate synthase, mitochondrial	LYS21	0	-0.346164	-0.127922	-0.302862	-0.132464	-0.0891496	-0.245984	-0.688902	0	-0.176323	0.169047	-0.133012	0.146155	0.235103	0.0952736	0.0929954	0	-0.222067	-0.0881964	-0.0532825	-0.00587856	0.145437	0.13033	0.108276	0.119	0.119	0.077	0.077	0.057	0.013	0.9	1	0.93	0.89	1.1	1.09	0.95	1.03	1.09
P28789	Porphobilinogen deaminase OS=Saccharomyces cerevisiae (strain ATCC 204508 / S288c) GN=HEM3 PE=1 SV=1	Porphobilinogen deaminase	HEM3	0	0.00600186	0.130721	0.373472	0.390777	0.0804142	0.209555	-0.496748	0	-0.0494892	0.034955	-0.0449194	0.059778	0.143041	0.18644	0.0427045	0	0.0748086	-0.105465	0.160465	0.198526	0.176049	0.110807	0.103929	0.052	0.029	0.062	0.063	0.051	0.028	1.03	1	0.99	1.11	1.09	1.09	1.01	1.1	1.09
P14306	Carboxypeptidase Y inhibitor OS=Saccharomyces cerevisiae (strain ATCC 204508 / S288c) GN=TFS1 PE=1 SV=2	Carboxypeptidase Y inhibitor	TFS1	0	0.150338	-0.000693603	0.246704	0.354767	0.0710331	0.131471	-0.302898	0	0.0476016	0.0469894	0.0110286	0.0910123	0.366466	0.054928	0.100189	0	0.136007	-0.125431	0.280302	0.185565	0.199486	0.134009	0.191342	0.061	0.019	0.091	0.03	0.12	0.025	1.04	1.02	1.01	1.07	1.13	1.13	1.02	1.11	1.09
P38616	Protein YGP1 OS=Saccharomyces cerevisiae (strain ATCC 204508 / S288c) GN=YGP1 PE=1 SV=2	Protein YGP1	YGP1	0	0.0798481	0.0446109	0.208357	0.245613	0.0984224	0.102553	-0.425637	0	-0.00497481	0.0090014	0.027502	0.116189	0.249198	0.109509	0.147504	0	0.0170303	-0.110062	0.22982	0.136502	0.121283	0.110215	0.0990624	0.028	0.005	0.047	0.002	0.051	0.008	1.03	1	0.98	1.07	1.13	1.08	1	1.09	1.09
P04173	3-isopropylmalate dehydrogenase OS=Saccharomyces cerevisiae (strain ATCC 204508 / S288c) GN=LEU2 PE=1 SV=4	3-isopropylmalate dehydrogenase	LEU2	0	0.0849494	0.0286452	0.15602	0.294502	0.104115	0.148081	0.0140444	0	-0.179354	-0.242857	-0.183963	-0.134053	-0.0132686	-0.117426	0.158592	0	0.37698	0.165274	0.116548	0.338154	0.423717	0.363123	0.155481	0.03	0.089	0.132	0.022	0.098	0.095	1.03	0.91	1.14	1.09	1.01	1.25	1.03	1.12	1.09
P05694	5-methyltetrahydropteroyltriglutamate--homocysteine methyltransferase OS=Saccharomyces cerevisiae (strain ATCC 204508 / S288c) GN=MET6 PE=1 SV=4	5-methyltetrahydropteroyltriglutamate--homocysteine methyltransferase	MET6	0	-0.0376096	-0.0383086	0.129893	0.160385	0.0125203	0.0293346	-0.134247	0	-0.000899076	0.183047	0.198795	0.140232	0.271229	0.114964	0.124182	0	-0.0267619	-0.102598	0.336319	0.130071	0.11438	0.0810711	0.288662	0.015	0.075	0.037	0.008	0.062	0.079	0.98	1.04	0.97	1.01	1.13	1.12	1	1.09	1.09
Q04120	Peroxiredoxin TSA2 OS=Saccharomyces cerevisiae (strain ATCC 204508 / S288c) GN=TSA2 PE=1 SV=3	Peroxiredoxin TSA2	TSA2	0	0.0356869	-0.01818	0.193269	0.282121	0.0453896	0.116628	-0.787151	0	-0.0573779	0.34034	0.249552	0.186012	0.218606	0.0636507	0.246766	0	-0.0668045	-0.0678141	0.13226	0.171717	0.224421	0.0851229	0.205117	0.019	0.154	0.027	0.035	0.067	0.052	1	1.08	0.97	1.06	1.13	1.13	1.02	1.11	1.09
P38840	Aromatic amino acid aminotransferase 2 OS=Saccharomyces cerevisiae (strain ATCC 204508 / S288c) GN=ARO9 PE=1 SV=3	Aromatic amino acid aminotransferase 2	ARO9	0	0.377001	0.178839	0.404943	0.463055	0.270648	0.356195	-0.00458727	0	0.0672908	-0.047765	0.137375	0.08205	0.267209	0.0652665	0.208498	0	0.162918	0.0292005	0.19824	0.182147	0.155641	0.174433	0.0627294	0.131	0.04	0.061	0.042	0.071	0.041	1.14	1.01	1.05	1.24	1.14	1.1	1.07	1.16	1.09
Q12178	Cytosine deaminase OS=Saccharomyces cerevisiae (strain ATCC 204508 / S288c) GN=FCY1 PE=1 SV=1	Cytosine deaminase	FCY1	0	0.228786	0.0246415	0.320473	0.352635	0.262024	0.264044	-0.383856	0	-0.20296	0.0520617	-0.393738	0.0336831	0.0225426	-0.147382	0.0629774	0	-0.268916	-0.296811	-0.0184608	-0.00689516	-0.0409303	-0.0801441	0.025004	0.089	0.091	0.117	0.001	0.076	0.037	1.06	0.97	0.88	1.2	0.99	0.98	0.97	1.06	1.09
P38711	40S ribosomal protein S27-B OS=Saccharomyces cerevisiae (strain ATCC 204508 / S288c) GN=RPS27B PE=1 SV=1	40S ribosomal protein S27-B	RPS27B	0	-0.292459	0.0867436	-0.0760055	0.211425	-0.10576	-0.0317787	-0.624796	0	-0.353429	-0.0337389	-0.418794	0.0374426	0.254953	0.0763122	-0.0761742	0	-0.353776	-0.00687743	-0.00562455	0.125947	0.0508626	0.116197	-0.0488451	0.133	0.13	0.134	0.036	0.115	0.057	0.96	0.92	0.93	0.95	1.07	1.03	0.94	1.02	1.09
Q05788	Purine nucleoside phosphorylase OS=Saccharomyces cerevisiae (strain ATCC 204508 / S288c) GN=PNP1 PE=1 SV=1	Purine nucleoside phosphorylase	PNP1	0	-0.0395284	0.0922968	0.0635651	0.108462	-0.0130562	-0.0664954	-0.189554	0	0.0960467	-0.122683	-0.122683	0.195256	0.179188	0.176878	0.296617	0	0.0781535	0.0997269	0.327082	0.2326	0.280614	0.230157	0.198013	0.047	0.076	0.036	0.026	0.048	0.029	1.01	1	1.04	0.97	1.16	1.18	1.02	1.1	1.09
P43567	Alanine--glyoxylate aminotransferase 1 OS=Saccharomyces cerevisiae (strain ATCC 204508 / S288c) GN=AGX1 PE=1 SV=1	Alanine--glyoxylate aminotransferase 1	AGX1	0	-0.105863	-0.0810862	-0.0048688	0.101479	-0.0375695	-0.0285439	-0.0814671	0	-0.0271579	0.217761	0.0534135	0.191608	0.294152	0.14059	0.167856	0	-0.0651376	-0.0569528	0.261803	0.101135	0.205681	0.135572	0.0989817	0.039	0.095	0.025	0.004	0.058	0.038	0.96	1.05	0.97	0.98	1.15	1.11	0.99	1.08	1.09
P32316	Acetyl-CoA hydrolase OS=Saccharomyces cerevisiae (strain ATCC 204508 / S288c) GN=ACH1 PE=1 SV=2	Acetyl-CoA hydrolase	ACH1	0	-0.0539208	-0.0480602	0.254924	0.109858	0.146095	0.0151318	0.145072	0	-0.01652	0.132764	-0.00845962	0.103312	0.287901	0.0697603	0.0488837	0	-0.0728459	-0.0784959	0.347073	0.0555457	0.102805	-0.0251821	0.19057	0.021	0.058	0.031	0.064	0.094	0.075	0.98	1.03	0.97	1.06	1.1	1.07	0.99	1.08	1.09
P0CX37	40S ribosomal protein S6-A OS=Saccharomyces cerevisiae (strain ATCC 204508 / S288c) GN=RPS6A PE=1 SV=1	40S ribosomal protein S6-A	RPS6A	0	0.114601	0.0772372	0.131328	0.361694	-0.0109003	-0.015673	-2.07348	0	0.104895	0.275634	0.222674	0.153728	0.482583	0.183412	0.121004	0	0.124053	0.0637697	0.891654	0.341187	0.38016	0.289948	0.325527	0.04	0.097	0.043	0.002	0.138	0.032	1.05	1.1	1.04	0.99	1.21	1.26	1.06	1.15	1.08
P10080	Single-stranded nucleic acid-binding protein OS=Saccharomyces cerevisiae (strain ATCC 204508 / S288c) GN=SBP1 PE=1 SV=2	Single-stranded nucleic acid-binding protein	SBP1	0	-0.0339901	0.0788391	0.158195	0.250975	0.0624793	0.0885184	-1.22667	0	-0.122436	-0.170398	-0.324139	0.107786	0.0698082	-0.0867005	0.158426	0	0.022319	0.0737624	0.28787	0.164859	0.179186	0.188969	0.158235	0.04	0.062	0.026	0.013	0.085	0.011	1.01	0.94	1.02	1.05	1.04	1.13	0.99	1.07	1.08
P05748	60S ribosomal protein L15-A OS=Saccharomyces cerevisiae (strain ATCC 204508 / S288c) GN=RPL15A PE=1 SV=3	60S ribosomal protein L15-A	RPL15A	0	-0.0981435	0.125094	0.043856	0.298869	-0.0190429	0.0494916	-1.85214	0	0.0235518	0.273986	0.141097	0.221261	0.34614	0.228854	0.175059	0	0.048285	0.00764306	0.352094	0.180389	0.228906	0.277016	0.112439	0.078	0.108	0.018	0.034	0.061	0.058	1.01	1.08	1.01	1.01	1.19	1.15	1.03	1.12	1.08
P15700	Uridylate kinase OS=Saccharomyces cerevisiae (strain ATCC 204508 / S288c) GN=URA6 PE=1 SV=1	Uridylate kinase	URA6	0	-0.232863	-0.152085	-0.0237608	-0.0998513	0.0449519	-0.12533	-0.727667	0	0.0133378	0.307263	-0.0240205	0.19013	0.396494	0.138315	-0.0225074	0	-0.151248	-0.0875691	0.326339	0.0737032	0.0607278	-0.0162342	0.280907	0.083	0.124	0.053	0.083	0.148	0.109	0.92	1.08	0.95	0.97	1.13	1.08	0.98	1.06	1.08
Q04894	NADP-dependent alcohol dehydrogenase 6 OS=Saccharomyces cerevisiae (strain ATCC 204508 / S288c) GN=ADH6 PE=1 SV=1	NADP-dependent alcohol dehydrogenase 6	ADH6	0	-0.0653196	0.111727	-0.00550095	0.301059	0.0681515	0.146734	0.00288683	0	-0.171426	-0.0982595	-0.21004	0.0548638	0.0760929	0.0138496	0.0556011	0	-0.157057	0.0915174	-0.302248	0.202877	0.0966809	0.175019	0.0231711	0.063	0.06	0.086	0.039	0.022	0.053	1.01	0.94	0.99	1.08	1.03	1.07	0.98	1.06	1.08
P53849	Zinc finger protein GIS2 OS=Saccharomyces cerevisiae (strain ATCC 204508 / S288c) GN=GIS2 PE=1 SV=1	Zinc finger protein GIS2	GIS2	0	0.0714624	0.112005	-0.15544	0.421286	0.194757	0.238759	-0.571252	0	-0.0821188	-0.376285	-0.248076	0.0994324	-0.149371	0.0528716	0.159015	0	0.100708	0.0675092	-0.17851	0.244543	0.209035	0.155032	-0.158969	0.039	0.132	0.035	0.022	0.107	0.132	1.04	0.91	1.04	1.16	1.02	1.06	1	1.08	1.08
P00447	Superoxide dismutase [Mn], mitochondrial OS=Saccharomyces cerevisiae (strain ATCC 204508 / S288c) GN=SOD2 PE=1 SV=1	Superoxide dismutase [Mn], mitochondrial	SOD2	0	0.112172	0.0211924	0.256601	0.236939	0.189285	0.148367	0.248287	0	0.00029334	-0.231942	0.179444	0.10311	0.0106199	0.0829402	0.101835	0	0.106354	0.064617	0.136235	0.178497	0.161302	0.0764926	0.178324	0.042	0.09	0.037	0.02	0.033	0.037	1.03	0.95	1.04	1.12	1.05	1.1	1.01	1.09	1.08
P53303	Zinc finger protein ZPR1 OS=Saccharomyces cerevisiae (strain ATCC 204508 / S288c) GN=ZPR1 PE=1 SV=1	Zinc finger protein ZPR1	ZPR1	0	-0.0315114	0.0407438	0.201223	0.308638	0.0662934	0.140078	-1.96503	0	-0.127609	-0.0360324	-0.123833	0.0424333	0.120676	0.0467294	-0.00110817	0	-0.0528075	-0.0297155	0.232654	0.078736	0.080988	0.0878828	0.124057	0.025	0.045	0.018	0.036	0.043	0.016	1	0.96	0.98	1.07	1.04	1.07	0.98	1.06	1.08
P40422	DNA-directed RNA polymerases I, II, and III subunit RPABC4 OS=Saccharomyces cerevisiae (strain ATCC 204508 / S288c) GN=RPC10 PE=1 SV=1	DNA-directed RNA polymerases I, II, and III subunit RPABC4	RPC10	0	0.329995	0.291956	0.252886	0.428458	0.275341	0.580461	0.377474	0	0.00942941	-0.123382	-0.281122	-0.370022	-0.154633	0.122374	0.0419553	0	0.0945899	0	0.193756	0.249642	-0.0269112	0.198927	0.0408888	0.121	0.051	0.038	0.149	0.097	0.081	1.16	0.97	1.02	1.35	1.01	1.05	1.05	1.14	1.08
P47120	Deoxyhypusine hydroxylase OS=Saccharomyces cerevisiae (strain ATCC 204508 / S288c) GN=LIA1 PE=1 SV=1	Deoxyhypusine hydroxylase	LIA1	0	0.343312	-0.0403801	0.398905	0.205515	0.0786055	0.109736	-0.461618	0	0.0338308	-0.0727707	-0.0346432	0.0524674	0.120862	0.187627	0.118557	0	0.0902851	-0.0779492	0.270698	0.170138	0.30142	0.158137	0.142559	0.151	0.038	0.058	0.015	0.027	0.062	1.08	0.99	1	1.07	1.1	1.15	1.03	1.11	1.08
P15731	Ubiquitin-conjugating enzyme E2 4 OS=Saccharomyces cerevisiae (strain ATCC 204508 / S288c) GN=UBC4 PE=1 SV=1	Ubiquitin-conjugating enzyme E2 4	UBC4	0	0.0321587	-0.094687	0.120472	0.277497	-0.0899594	-0.133076	-0.673349	0	0.271819	0.182698	0.259087	0.126458	0.349215	0.299212	0.466623	0	0.0477879	-0.141246	0.30841	0.221324	0.221324	0.0905375	0.12007	0.045	0.094	0.067	0.021	0.06	0.048	0.99	1.11	0.98	0.93	1.3	1.11	1.03	1.11	1.08
P19881	4-nitrophenylphosphatase OS=Saccharomyces cerevisiae (strain ATCC 204508 / S288c) GN=PHO13 PE=1 SV=2	4-nitrophenylphosphatase	PHO13	0	-0.0463	0.0227473	0.100058	0.0702373	-0.0433062	-0.00348688	-0.267045	0	0.00768268	0.0679768	0.0388144	0.106561	0.217668	0.169069	0.117507	0	0.0540833	0.0662193	0.283924	0.108039	0.250279	0.190429	0.257118	0.024	0.026	0.024	0.02	0.035	0.025	0.99	1.02	1.03	0.98	1.12	1.18	1.01	1.09	1.08
P39721	Protein AIM2 OS=Saccharomyces cerevisiae (strain ATCC 204508 / S288c) GN=AIM2 PE=1 SV=1	Protein AIM2	AIM2	0	0.0859732	0.0576783	0.00694363	0.240716	0.0601081	0.0984385	0.049753	0	0.0841728	-0.0574053	0.0389065	0.104184	-0.0651203	0.0670208	0.146735	0	-0.0751574	-0.0200158	0.240069	0.277952	0.183155	0.261755	0.218651	0.03	0.05	0.027	0.019	0.073	0.027	1.03	1.01	0.98	1.06	1.04	1.17	1.01	1.09	1.08
P38235	Uncharacterized protein YBR053C OS=Saccharomyces cerevisiae (strain ATCC 204508 / S288c) GN=YBR053C PE=1 SV=1	Uncharacterized protein YBR053C	YBR053C	0	0.078421	0.0309479	0.261177	1.21738	0.0226207	0.162779	-1.51814	0	-0.0714449	0.115772	0.807903	0.69492	0.255447	0.107783	0.140349	0	-0.0213917	0.0196516	0.225182	0.50637	0.149757	0.150192	0.052364	0.027	0.066	0.014	0.069	0.054	0.039	1.03	1.01	1	1.07	1.12	1.09	1.01	1.09	1.08
P05738	60S ribosomal protein L9-A OS=Saccharomyces cerevisiae (strain ATCC 204508 / S288c) GN=RPL9A PE=1 SV=2	60S ribosomal protein L9-A	RPL9A	0	-0.135703	-0.00767873	-0.00451195	0.202466	-0.0404296	-0.0642532	-1.06284	0	-0.165523	0.156682	-0.00717084	0.135731	0.270252	0.116975	0.244249	0	-0.124566	0.00381722	0.333012	0.0122639	0.0945155	0.0607102	0.0708544	0.052	0.111	0.05	0.012	0.056	0.012	0.97	1	0.97	0.96	1.16	1.05	0.98	1.06	1.08
P39708	NADP-specific glutamate dehydrogenase 2 OS=Saccharomyces cerevisiae (strain ATCC 204508 / S288c) GN=GDH3 PE=3 SV=1	NADP-specific glutamate dehydrogenase 2	GDH3	0	-0.132609	-0.0857628	-0.0439052	0.0644478	-0.0507649	-0.0578549	-0.440776	0	-0.0220627	0.155785	0.0454338	0.131862	0.217566	0.0930909	0.123195	0	-0.0476833	-0.064791	0.182984	0.105358	0.147637	0.111106	0.241904	0.047	0.068	0.023	0.003	0.045	0.047	0.95	1.03	0.97	0.96	1.11	1.12	0.99	1.06	1.08
Q03048	Cofilin OS=Saccharomyces cerevisiae (strain ATCC 204508 / S288c) GN=COF1 PE=1 SV=1	Cofilin	COF1	0	0.0264389	0.0246366	0.0998581	0.224273	0.0402899	0.0791694	-0.823918	0	-0.039264	0.238742	-0.0619588	0.232727	0.33839	0.0619538	0.0234911	0	-0.0832093	-0.0796529	0.218118	0.121526	0.225963	0.0417775	0.195956	0.01	0.107	0.033	0.019	0.123	0.067	1.01	1.05	0.96	1.04	1.11	1.11	1.01	1.09	1.08
P46367	Potassium-activated aldehyde dehydrogenase, mitochondrial OS=Saccharomyces cerevisiae (strain ATCC 204508 / S288c) GN=ALD4 PE=1 SV=2	Potassium-activated aldehyde dehydrogenase, mitochondrial	ALD4	0	-0.09677	-0.0849864	0.00789061	0.130102	-0.0379327	-0.00777231	-1.16332	0	-0.100375	0.083302	-0.143747	0.123144	0.1463	0.0133692	0.0412941	0	-0.13535	-0.117504	0.319753	0.0606578	0.135871	0.0436508	0.211853	0.037	0.064	0.052	0.015	0.049	0.058	0.96	1	0.94	0.98	1.05	1.1	0.97	1.04	1.08
P32836	GTP-binding nuclear protein GSP2/CNR2 OS=Saccharomyces cerevisiae (strain ATCC 204508 / S288c) GN=GSP2 PE=1 SV=1	GTP-binding nuclear protein GSP2/CNR2	GSP2	0	-0.370637	-0.0790428	-0.344838	0.0677504	-0.0833692	-0.133043	-0.179671	0	-0.219722	0.232555	-0.353676	0.14439	0.260312	0.0100418	0.023649	0	-0.090203	-0.0679196	-0.0181494	0.0223703	0.0520303	0.0171285	0.343823	0.131	0.157	0.033	0.024	0.1	0.128	0.91	1.01	0.96	0.93	1.07	1.11	0.96	1.04	1.08
Q03148	Pyridoxal 5'-phosphate synthase subunit SNZ1 OS=Saccharomyces cerevisiae (strain ATCC 204508 / S288c) GN=SNZ1 PE=1 SV=1	Pyridoxal 5'-phosphate synthase subunit SNZ1	SNZ1	0	-0.278492	-0.198404	-0.130766	0.0035879	-0.206257	-0.104651	-1.42755	0	0.0617632	0.251473	0.342668	0.346524	0.342668	0.379516	0.261946	0	0.0315153	-0.0336573	0.0918936	0.133494	0.105676	0.141162	-0.0236203	0.101	0.093	0.023	0.05	0.041	0.059	0.9	1.08	1	0.9	1.26	1.05	0.99	1.07	1.08
A6ZS33	Leukotriene A-4 hydrolase homolog OS=Saccharomyces cerevisiae (strain YJM789) GN=SCY_4744 PE=3 SV=1	Leukotriene A-4 hydrolase homolog	SCY_4744	0	-0.120196	-0.0982441	0.107803	-0.0056643	-0.0675091	-0.030085	-0.422595	0	0.0541307	0.288447	0.0634893	0.136466	0.376975	0.180558	0.174672	0	0.0250153	0.0574272	0.183151	0.198339	0.202731	0.107777	0.256437	0.045	0.109	0.02	0.018	0.082	0.052	0.95	1.09	1.02	0.97	1.19	1.14	1.02	1.1	1.08
P32445	Single-stranded DNA-binding protein RIM1, mitochondrial OS=Saccharomyces cerevisiae (strain ATCC 204508 / S288c) GN=RIM1 PE=1 SV=1	Single-stranded DNA-binding protein RIM1, mitochondrial	RIM1	0	0.401035	0.0786926	0.701784	0.384385	0.249307	0.306103	-1.3329	0	0.243506	-0.0875284	0.347699	0.179215	0.224787	0.105117	0.137885	0	0.227852	0.0877024	0.651558	0.293796	0.252679	0.281784	0.135206	0.152	0.122	0.08	0.028	0.043	0.053	1.13	1.04	1.08	1.21	1.11	1.17	1.08	1.17	1.08
Q00816	Resistance to glucose repression protein 1 OS=Saccharomyces cerevisiae (strain ATCC 204508 / S288c) GN=REG1 PE=1 SV=1	Resistance to glucose repression protein 1	REG1	0	0.274498	0.0860349	0.138691	0.248026	0.050433	0.236983	-0.629984	0	0.0354416	-0.110254	0.0427169	0.0700333	0.140897	0.130009	0.328789	0	0.0728989	0.116859	-0.00406311	0.293716	0.196914	0.163147	0.0545981	0.099	0.052	0.041	0.091	0.079	0.051	1.09	0.98	1.05	1.11	1.15	1.1	1.04	1.12	1.08
P54115	Magnesium-activated aldehyde dehydrogenase, cytosolic OS=Saccharomyces cerevisiae (strain ATCC 204508 / S288c) GN=ALD6 PE=1 SV=4	Magnesium-activated aldehyde dehydrogenase, cytosolic	ALD6	0	-0.0415565	-0.0652642	0.134032	0.171623	-0.0338969	-0.0311017	-2.01662	0	-0.00669465	0.221116	0.166565	0.167794	0.354205	0.123963	0.0893065	0	-0.0791103	-0.145337	0.235896	0.142431	0.176888	0.0579484	0.118551	0.023	0.092	0.051	0.001	0.102	0.041	0.98	1.05	0.95	0.98	1.14	1.09	0.99	1.07	1.08
P33315	Transketolase 2 OS=Saccharomyces cerevisiae (strain ATCC 204508 / S288c) GN=TKL2 PE=1 SV=1	Transketolase 2	TKL2	0	-0.0904187	-0.0141745	0.114223	0.158943	0.0118651	0.0343708	-0.578268	0	-0.191354	0.187847	-0.112124	0.0611713	0.221943	0.119311	0.0450728	0	0.0343249	0.0127806	0.315192	0.080405	0.155039	0.124886	0.171225	0.033	0.131	0.012	0.011	0.062	0.016	0.98	1	1.01	1.02	1.09	1.11	1	1.07	1.08
P89886	Translation machinery-associated protein 20 OS=Saccharomyces cerevisiae (strain ATCC 204508 / S288c) GN=TMA20 PE=1 SV=1	Translation machinery-associated protein 20	TMA20	0	0.147598	0.356694	-0.15788	0.410632	0.20977	0.173829	-0.141615	0	-0.0907655	0.0645128	-0.216722	0.0603005	0.230226	-0.00882385	0.0926282	0	-0.00561361	-0.197857	0.102707	0.315752	0.21074	0.27466	-0.122732	0.125	0.054	0.076	0.018	0.084	0.142	1.13	0.99	0.96	1.14	1.08	1.1	1.03	1.11	1.08
P43590	Uncharacterized peptidase YFR006W OS=Saccharomyces cerevisiae (strain ATCC 204508 / S288c) GN=YFR006W PE=1 SV=1	Uncharacterized peptidase YFR006W	YFR006W	0	0.151743	0.135913	0.0796272	0.160758	0.147045	0.199513	0.0272771	0	0.0911762	0.182451	-0.111893	0.140846	0.251469	0.264539	0.203415	0	0.161418	0.121932	0.154459	0.196468	0.269847	0.245678	0.0412409	0.057	0.063	0.058	0.026	0.022	0.085	1.07	1.07	1.07	1.13	1.18	1.14	1.07	1.15	1.08
Q12335	Protoplast secreted protein 2 OS=Saccharomyces cerevisiae (strain ATCC 204508 / S288c) GN=PST2 PE=1 SV=1	Protoplast secreted protein 2	PST2	0	-0.0764215	-0.162886	0.168889	-0.0103611	-0.112511	-0.0744914	-0.362927	0	-0.449732	0.0538128	-0.404612	0.131464	0.0954823	-0.099484	-0.0152591	0	-0.490516	-0.0863846	-0.277203	0.0594862	0.0981783	0.0161097	0.0119982	0.056	0.181	0.172	0.019	0.068	0.034	0.95	0.92	0.88	0.94	1	1.03	0.92	0.99	1.08
Q3E7X9	40S ribosomal protein S28-A OS=Saccharomyces cerevisiae (strain ATCC 204508 / S288c) GN=RPS28A PE=1 SV=1	40S ribosomal protein S28-A	RPS28A	0	-0.0305746	-0.0349157	0.121373	0.22889	0.0316821	-0.0399733	0.102626	0	-0.0311478	0.014382	0.0217543	0.096451	0.234481	0.112407	0.0676411	0	-0.0722298	-0.229884	0.23079	0.126489	0.146359	-0.00477033	0.00459092	0.013	0.016	0.08	0.035	0.061	0.06	0.99	1	0.93	1	1.1	1.04	0.97	1.04	1.08
P54113	Bifunctional purine biosynthesis protein ADE16 OS=Saccharomyces cerevisiae (strain ATCC 204508 / S288c) GN=ADE16 PE=1 SV=1	Bifunctional purine biosynthesis protein ADE16	ADE16	0	-0.196004	-0.0995225	-0.149314	0.0515887	-0.13584	-0.11386	-0.585425	0	-0.106123	0.186387	0.323987	0.0621585	0.23504	0.0562269	0.113363	0	-0.115864	0.0256679	0.0305618	0.204683	0.228966	0.162411	0.180972	0.068	0.104	0.052	0.011	0.064	0.024	0.94	1.02	0.98	0.92	1.1	1.14	0.98	1.05	1.07
P17695	Glutaredoxin-2, mitochondrial OS=Saccharomyces cerevisiae (strain ATCC 204508 / S288c) GN=GRX2 PE=1 SV=3	Glutaredoxin-2, mitochondrial	GRX2	0	-0.0830812	0.0854532	0.051048	0.15999	0.0117615	0.0446088	-0.864626	0	-0.097536	0.164909	-0.0247461	0.105659	0.265034	0.0707953	0.061821	0	-0.0735907	-0.0462834	0.195268	0.147062	0.16085	0.0702432	0.172833	0.058	0.093	0.026	0.016	0.081	0.038	1	1.02	0.97	1.02	1.1	1.1	1	1.07	1.07
Q3E754	40S ribosomal protein S21-B OS=Saccharomyces cerevisiae (strain ATCC 204508 / S288c) GN=RPS21B PE=1 SV=1	40S ribosomal protein S21-B	RPS21B	0	-0.312754	-0.353093	0.125873	-0.155198	-0.276685	-0.341204	-0.664866	0	0.048742	0.245716	0.307148	0.17301	0.462636	0.245384	0.0593746	0	-0.0831605	-0.1315	0.550019	0.148063	0.0820104	0.0416669	0.258475	0.138	0.092	0.046	0.032	0.14	0.081	0.86	1.07	0.95	0.81	1.2	1.09	0.96	1.03	1.07
Q08225	Probable dipeptidyl peptidase 3 OS=Saccharomyces cerevisiae (strain ATCC 204508 / S288c) GN=YOL057W PE=1 SV=1	Probable dipeptidyl peptidase 3	YOL057W	0	0.0791659	-0.00354253	-0.00531706	0.201903	-0.0213869	0.0982968	-0.408272	0	-0.0482827	0.00805977	-0.025481	0.211091	0.0995357	0.0948133	0.238753	0	0.171354	-0.177064	-0.117367	-0.0110693	-0.00552405	0.0428525	0.357866	0.033	0.021	0.12	0.059	0.058	0.141	1.02	0.99	1	1.03	1.11	1.1	1	1.08	1.07
A6ZWL1	Nascent polypeptide-associated complex subunit beta-1 OS=Saccharomyces cerevisiae (strain YJM789) GN=EGD1 PE=3 SV=1	Nascent polypeptide-associated complex subunit beta-1	EGD1	0	0.129726	-0.065095	0.117581	0.1494	-0.00915419	-0.0397819	0.0298032	0	0.141218	0.183053	0.339513	0.24377	0.396909	0.461642	0.135525	0	0.0965049	0.0421521	0.237775	0.267911	0.218162	-0.0331177	0.266375	0.069	0.065	0.034	0.015	0.116	0.108	1.02	1.08	1.03	0.98	1.26	1.11	1.04	1.12	1.07
P31787	Acyl-CoA-binding protein OS=Saccharomyces cerevisiae (strain ATCC 204508 / S288c) GN=ACB1 PE=1 SV=3	Acyl-CoA-binding protein	ACB1	0	0.172521	-0.0379025	-0.0308333	0.214578	0.0720955	-0.0503001	-0.00960683	0	0.0174874	-0.252517	0.153071	0.17587	0.0629095	0.203781	0.180129	0	-0.0631028	-0.0222765	-0.0636338	0.155683	0.164324	0.0733144	0.038113	0.079	0.101	0.022	0.06	0.052	0.046	1.03	0.95	0.98	1.01	1.11	1.07	0.99	1.06	1.07
P27614	Carboxypeptidase S OS=Saccharomyces cerevisiae (strain ATCC 204508 / S288c) GN=CPS1 PE=1 SV=2	Carboxypeptidase S	CPS1	0	-0.0834886	0.0665213	0.0313259	0.313947	0.0198462	0.134591	-1.53095	0	-0.1324	-0.0890847	-0.218572	0.0183549	0.129304	0.0159579	0.00372693	0	-0.140982	-0.254971	0.0487815	0.0289425	0.00217009	0.0330302	-0.111987	0.052	0.047	0.089	0.056	0.049	0.052	1	0.95	0.91	1.06	1.04	0.98	0.95	1.02	1.07
P08518	DNA-directed RNA polymerase II subunit RPB2 OS=Saccharomyces cerevisiae (strain ATCC 204508 / S288c) GN=RPB2 PE=1 SV=2	DNA-directed RNA polymerase II subunit RPB2	RPB2	0	0.0934789	0.117295	0.192091	0.244188	0.0744193	0.110922	-0.994099	0	0.160404	0.14312	0.195866	0.166546	0.306832	0.225092	0.240699	0	0.125789	0.0445632	0.257133	0.185887	0.206451	0.265925	0.0784266	0.043	0.06	0.044	0.018	0.03	0.066	1.05	1.07	1.04	1.07	1.2	1.14	1.06	1.13	1.07
P31383	Protein phosphatase PP2A regulatory subunit A OS=Saccharomyces cerevisiae (strain ATCC 204508 / S288c) GN=TPD3 PE=1 SV=3	Protein phosphatase PP2A regulatory subunit A	TPD3	0	-0.0256996	0.0415234	0.246679	0.21698	0.0911119	0.080218	-1.31567	0	-0.0937438	0.0423123	-0.165753	0.0687845	0.17121	-0.0123948	-0.0275153	0	-0.115334	-0.13163	0.263116	0.087535	0.143888	0.0612166	0.047282	0.024	0.048	0.05	0.005	0.078	0.037	1	0.99	0.95	1.06	1.03	1.06	0.98	1.05	1.07
P15180	Lysine--tRNA ligase, cytoplasmic OS=Saccharomyces cerevisiae (strain ATCC 204508 / S288c) GN=KRS1 PE=1 SV=2	Lysine--tRNA ligase, cytoplasmic	KRS1	0	-0.197387	0.0246433	0.261008	0.212734	-0.0149906	0.106955	-0.812265	0	0.405992	0.47063	0.465042	0.0947187	0.481742	0.370563	0.230467	0	0.0330547	0.0578431	0.439237	0.230735	0.264941	0.330653	-0.0687073	0.082	0.168	0.02	0.06	0.087	0.142	0.96	1.24	1.02	1.03	1.29	1.14	1.07	1.15	1.07
P22203	V-type proton ATPase subunit E OS=Saccharomyces cerevisiae (strain ATCC 204508 / S288c) GN=VMA4 PE=1 SV=4	V-type proton ATPase subunit E	VMA4	0	-0.100456	0.0458063	0.0788527	0.238248	-0.051053	0.0129864	-1.38313	0	0.043658	0.0833657	0.0921291	0.200844	0.183302	0.166804	0.103585	0	0.0785671	0.0195922	0.389698	0.291013	0.263287	0.229574	0.175322	0.051	0.029	0.029	0.031	0.029	0.031	0.99	1.03	1.02	0.99	1.11	1.17	1.01	1.09	1.07
A6ZNU5	Ribose-5-phosphate isomerase OS=Saccharomyces cerevisiae (strain YJM789) GN=RKI1 PE=3 SV=1	Ribose-5-phosphate isomerase	RKI1	0	-0.112669	0.104659	0.0836956	0.294447	0.146146	0.159665	-0.0787635	0	-0.014073	0.0386028	-0.0511343	0.109549	0.164927	0.0743006	0.00598952	0	-0.255007	-0.024453	-0.327394	0.0392269	0.107885	0.0240455	-0.189946	0.075	0.019	0.095	0.007	0.055	0.104	1	1.01	0.94	1.11	1.06	0.99	0.98	1.05	1.07
P16370	DNA-directed RNA polymerase II subunit RPB3 OS=Saccharomyces cerevisiae (strain ATCC 204508 / S288c) GN=RPB3 PE=1 SV=2	DNA-directed RNA polymerase II subunit RPB3	RPB3	0	-0.0204098	0.112063	0	0.294564	-0.0127223	-0.00507545	-0.41546	0	0.0520977	0.0608074	-0.00518489	0.167767	0.312321	0.171218	0.339163	0	0.0500051	0.0454612	0.116501	0.263947	0.201328	0.0522717	0.116501	0.05	0.023	0.019	0.004	0.061	0.052	1.02	1.03	1.02	0.99	1.21	1.09	1.02	1.1	1.07
P43545	Probable pyridoxal 5'-phosphate synthase subunit SNZ3 OS=Saccharomyces cerevisiae (strain ATCC 204508 / S288c) GN=SNZ3 PE=2 SV=1	Probable pyridoxal 5'-phosphate synthase subunit SNZ3	SNZ3	0	0.0759356	0.0462393	0.112694	0.225193	-0.000516447	0.0832652	-1.10382	0	-0.0657725	-0.332657	-0.0888294	0.0616908	0.0421369	0.0188796	-0.000316763	0	0.0153684	-0.0661948	0.233934	0.158074	0.126577	0.171855	0.12126	0.026	0.118	0.03	0.041	0.015	0.019	1.03	0.92	0.99	1.03	1.01	1.1	0.98	1.05	1.07
P15454	Guanylate kinase OS=Saccharomyces cerevisiae (strain ATCC 204508 / S288c) GN=GUK1 PE=1 SV=2	Guanylate kinase	GUK1	0	-0.333119	-0.11574	-0.060534	0.0408606	-0.179663	-0.179663	-1.18442	0	0.0407071	0.345475	0.210886	0.224603	0.441535	0.282452	0.348426	0	-0.212384	-0.140806	0.128277	0.0347654	-0.122016	-0.0145884	0.0187905	0.115	0.135	0.076	0	0.056	0.05	0.91	1.1	0.92	0.88	1.28	0.97	0.98	1.05	1.07
P39676	Flavohemoprotein OS=Saccharomyces cerevisiae (strain ATCC 204508 / S288c) GN=YHB1 PE=1 SV=2	Flavohemoprotein	YHB1	0	-0.0810578	0.157129	0.113008	0.262864	0.324928	0.211776	-0.821456	0	-0.0230034	0.224842	-0.130656	0.159209	0.311458	0.0121315	-0.113662	0	-0.0894088	0.141514	0.247152	0.159702	0.196233	0.160765	-0.207036	0.085	0.097	0.081	0.055	0.155	0.148	1.02	1.05	1.01	1.21	1.06	1.04	1.03	1.1	1.07
P38013	Peroxiredoxin type-2 OS=Saccharomyces cerevisiae (strain ATCC 204508 / S288c) GN=AHP1 PE=1 SV=4	Peroxiredoxin type-2	AHP1	0	0.00938941	-0.113452	0.111482	0.192444	0.0416055	0.0222449	-0.174583	0	0.0238368	0.161029	0.133389	0.125096	0.277661	0.119402	0.0972463	0	0.0341714	-0.072092	0.283437	0.183476	0.090968	0.0507604	0.204741	0.047	0.061	0.037	0.009	0.069	0.056	0.98	1.04	0.99	1.02	1.12	1.08	1	1.08	1.07
P0CX36	40S ribosomal protein S4-B OS=Saccharomyces cerevisiae (strain ATCC 204508 / S288c) GN=RPS4B PE=1 SV=1	40S ribosomal protein S4-B	RPS4B	0	-0.0257168	0.0503787	0.0692536	0.249956	-0.0625893	-0.00680014	-1.4066	0	0.0131853	0.162669	0.159586	0.189807	0.191556	0.147187	0.1058	0	-0.00559983	-0.158016	0.392799	0.242228	0.262308	0.183803	0.131116	0.027	0.064	0.061	0.027	0.03	0.046	1.01	1.04	0.96	0.98	1.11	1.14	1	1.08	1.07
P50106	DNA-directed RNA polymerase I subunit RPA14 OS=Saccharomyces cerevisiae (strain ATCC 204508 / S288c) GN=RPA14 PE=1 SV=1	DNA-directed RNA polymerase I subunit RPA14	RPA14	0	0.163178	-0.107088	-0.0760095	0.120474	-0.334321	0.015621	-0.328675	0	-0.0728329	0.0819688	-0.333069	-0.0822011	0.373381	0.236905	0.217947	0	0.0650635	0.012824	0.0568312	0.156504	0.141012	0.185111	0.235216	0.095	0.054	0.024	0.171	0.06	0.033	1.02	1	1.02	0.9	1.21	1.14	1.01	1.08	1.07
P30656	Proteasome subunit beta type-5 OS=Saccharomyces cerevisiae (strain ATCC 204508 / S288c) GN=PRE2 PE=1 SV=3	Proteasome subunit beta type-5	PRE2	0	0.0265726	0.0685476	0.102005	0.16034	0.00551098	0.112987	-1.71272	0	0.0959728	-0.0303896	-0.0450521	0.134836	0.121076	0.107881	0.149143	0	0.066845	-0.0205393	0.107103	0.0402216	0.125915	0.169852	0.238374	0.024	0.046	0.032	0.053	0.015	0.039	1.02	1.02	1.01	1.04	1.09	1.13	1.02	1.09	1.07
P20435	DNA-directed RNA polymerases I, II, and III subunit RPABC2 OS=Saccharomyces cerevisiae (strain ATCC 204508 / S288c) GN=RPO26 PE=1 SV=1	DNA-directed RNA polymerases I, II, and III subunit RPABC2	RPO26	0	0.174086	0.0711544	0.250203	0.3353	0.121645	0.105266	-1.46863	0	-0.0249205	-0.301119	-0.221043	0.0776614	0.10428	-0.0486024	0.134112	0	0.131	-0.0229881	0.276008	0.167587	0.183583	0.123679	0.11632	0.061	0.112	0.058	0.008	0.067	0.026	1.06	0.93	1.03	1.08	1.05	1.1	1.01	1.08	1.07
P38011	Guanine nucleotide-binding protein subunit beta-like protein OS=Saccharomyces cerevisiae (strain ATCC 204508 / S288c) GN=ASC1 PE=1 SV=4	Guanine nucleotide-binding protein subunit beta-like protein	ASC1	0	-0.034247	-0.121655	0.157571	0.0430587	-0.0459628	0.00999934	-0.118883	0	0.0577596	0.268497	0.10986	0.239545	0.325702	0.238497	0.0995057	0	0.190549	-0.0678126	0.295611	0.16275	0.195816	0.132735	0.231044	0.043	0.1	0.095	0.027	0.078	0.034	0.97	1.08	1.03	0.99	1.17	1.14	1.03	1.1	1.07
A6ZRM0	Adenylosuccinate synthetase OS=Saccharomyces cerevisiae (strain YJM789) GN=ADE12 PE=3 SV=1	Adenylosuccinate synthetase	ADE12	0	-0.0777909	-0.0253111	0.0100797	0.191331	-0.0188417	0.0838226	-2.09424	0	-0.0994868	0.110348	-0.103429	0.181773	0.227304	0.145846	-0.000769278	0	-0.0697306	0.0352234	0.0775759	0.206836	0.16628	0.0657747	0.0334343	0.027	0.073	0.037	0.05	0.079	0.049	0.98	1	0.99	1.02	1.09	1.06	0.99	1.06	1.07
P39013	Actin cytoskeleton-regulatory complex protein END3 OS=Saccharomyces cerevisiae (strain ATCC 204508 / S288c) GN=END3 PE=1 SV=1	Actin cytoskeleton-regulatory complex protein END3	END3	0	0.017278	-0.016315	-0.016315	0.19684	-0.0435253	0.170311	-1.21584	0	0.184647	-0.165942	0.0597812	0.171158	0.0437214	0.140024	0.243247	0	0.0821307	0.0372962	0.330849	0.0755409	0.0849457	0.196741	0.0980103	0.012	0.122	0.029	0.105	0.069	0.043	1	1.01	1.03	1.05	1.11	1.09	1.01	1.08	1.07
P22217	Thioredoxin-1 OS=Saccharomyces cerevisiae (strain ATCC 204508 / S288c) GN=TRX1 PE=1 SV=3	Thioredoxin-1	TRX1	0	-0.0768257	-0.0648474	0.178554	0.158403	-0.0274356	0.0171258	-0.811973	0	-0.0182682	0.196104	0.000235734	0.118964	0.344872	0.0917901	0.0225727	0	-0.0835727	-0.164692	0.283106	0.0466517	0.0788852	-0.0294222	0.134493	0.029	0.084	0.057	0.022	0.121	0.057	0.97	1.04	0.95	1	1.12	1.04	0.99	1.05	1.07
P39976	D-2-hydroxyglutarate--pyruvate transhydrogenase DLD3 OS=Saccharomyces cerevisiae (strain ATCC 204508 / S288c) GN=DLD3 PE=1 SV=1	D-2-hydroxyglutarate--pyruvate transhydrogenase DLD3	DLD3	0	0.0868845	-0.0231188	0.231103	0.192918	0.0961096	0.065649	-0.31281	0	0.0423108	0.251539	-0.0396609	0.0385997	0.298844	0.106643	0.119874	0	-0.0100967	-0.174474	0.360208	0.071427	0.129299	0.140499	0.00390748	0.041	0.095	0.067	0.015	0.076	0.052	1.02	1.07	0.96	1.06	1.13	1.07	1.02	1.09	1.07
P24031	Constitutive acid phosphatase OS=Saccharomyces cerevisiae (strain ATCC 204508 / S288c) GN=PHO3 PE=1 SV=2	Constitutive acid phosphatase	PHO3	0	-0.0175611	-0.0230078	0.155155	0.103603	-0.140191	0.127152	-0.740775	0	0.241489	0.244795	0.356559	0.191667	0.274852	0.454016	0.338729	0	0.0269442	-0.00702244	0.255391	0.135592	0.102582	-0.0115847	0.106797	0.008	0.094	0.012	0.131	0.063	0.046	0.99	1.12	1	1	1.28	1.05	1.04	1.11	1.07
P38237	Ubiquitin carboxyl-terminal hydrolase 14 OS=Saccharomyces cerevisiae (strain ATCC 204508 / S288c) GN=UBP14 PE=1 SV=2	Ubiquitin carboxyl-terminal hydrolase 14	UBP14	0	0.189214	0.124674	0.276677	0.398668	0.053813	0.0799851	-0.65698	0	0.0342835	0.244118	0.158638	0.248992	0.0594718	0.124567	0.121912	0	0.0652177	0.085008	0.283048	0.286471	0.346731	0.379153	0.326923	0.066	0.094	0.031	0.013	0.025	0.018	1.08	1.07	1.04	1.05	1.07	1.28	1.06	1.13	1.07
P38349	UBX domain-containing protein 7 OS=Saccharomyces cerevisiae (strain ATCC 204508 / S288c) GN=UBX7 PE=1 SV=1	UBX domain-containing protein 7	UBX7	0	0.129714	0.0429209	0.251539	0.231698	0.0940516	0.202872	-0.278194	0	-0.231443	-0.142112	-0.231443	-0.00135401	0.0777176	0.0174874	-0.025946	0	-0.0016441	0.00982543	0.273132	0.0892016	0.107619	0.174664	-0.1469	0.046	0.082	0.004	0.053	0.036	0.114	1.04	0.92	1	1.11	1.02	1.04	0.99	1.05	1.07
P23542	Aspartate aminotransferase, cytoplasmic OS=Saccharomyces cerevisiae (strain ATCC 204508 / S288c) GN=AAT2 PE=1 SV=3	Aspartate aminotransferase, cytoplasmic	AAT2	0	-0.0751463	-0.0205233	0.223231	0.140734	0.0209164	-0.0086607	-0.232212	0	-0.0749721	0.226422	0.0142397	0.100364	0.225134	-0.00565985	0.142596	0	0.144066	0.0600168	0.568125	0.110558	0.282759	0.0810902	0.337673	0.027	0.111	0.05	0.014	0.08	0.091	0.98	1.04	1.05	1	1.09	1.18	1.02	1.09	1.07
Q05050	Eisosome protein 1 OS=Saccharomyces cerevisiae (strain ATCC 204508 / S288c) GN=EIS1 PE=1 SV=1	Eisosome protein 1	EIS1	0	0.118374	0.105691	0.323374	0.352892	0.0386946	0.0305164	-1.00267	0	-0.012749	0.00766681	0.0547258	0.0689414	0.152861	0.105625	0.173615	0	0.0031278	0.044323	0.148633	0.333623	0.173487	0.242934	0.146513	0.044	0.007	0.017	0.004	0.024	0.035	1.05	1	1.01	1.02	1.11	1.14	1.02	1.09	1.07
P14065	Glycerol 2-dehydrogenase (NADP(+)) OS=Saccharomyces cerevisiae (strain ATCC 204508 / S288c) GN=GCY1 PE=1 SV=1	Glycerol 2-dehydrogenase (NADP(+))	GCY1	0	-0.217709	0.02251	-0.119357	0.231009	0.0289755	0.0699758	-0.224892	0	-0.323259	-0.00783939	-0.558263	0.0363013	0.0679079	-0.057522	-0.098253	0	-0.149732	-0.0631903	-0.0507184	0.109516	0.0341496	0.0675095	-0.0318499	0.089	0.123	0.052	0.02	0.061	0.035	0.96	0.93	0.95	1.03	0.98	1.02	0.95	1.01	1.07
P34216	EH domain-containing and endocytosis protein 1 OS=Saccharomyces cerevisiae (strain ATCC 204508 / S288c) GN=EDE1 PE=1 SV=2	EH domain-containing and endocytosis protein 1	EDE1	0	0.0794844	0.105345	0.476638	0.288089	0.140932	0.119207	-1.06351	0	-0.130072	0.0723623	-0.130401	0.135809	0.308041	0.0493201	0.139087	0	-0.0656908	0.0410647	0.106143	0.177294	0.072892	0.0259332	-0.0642942	0.038	0.07	0.037	0.011	0.092	0.048	1.04	0.99	0.99	1.09	1.12	1.01	1.01	1.08	1.07
P54114	Aldehyde dehydrogenase [NAD(P)+] 2 OS=Saccharomyces cerevisiae (strain ATCC 204508 / S288c) GN=ALD3 PE=1 SV=1	Aldehyde dehydrogenase [NAD(P)+] 2	ALD3	0	-0.0671985	0.0473628	0.0895732	0.222055	-0.00310178	0.0369979	-1.30052	0	-0.153863	0.0786873	-0.210401	0.117192	0.143519	-0.0137507	-0.00444814	0	-0.137227	-0.0788831	0.0888567	0.160364	0.179463	0.114863	0.0483953	0.04	0.081	0.048	0.02	0.062	0.045	1	0.98	0.95	1.01	1.03	1.08	0.98	1.04	1.07
P05740	60S ribosomal protein L17-A OS=Saccharomyces cerevisiae (strain ATCC 204508 / S288c) GN=RPL17A PE=1 SV=4	60S ribosomal protein L17-A	RPL17A	0	0.0310413	0.105058	0.18766	0.189436	0.0177719	0.0323615	-1.1733	0	0.15416	0.177311	0.395428	0.15725	0.341877	0.274927	0.232681	0	0.360976	0.173299	0.595441	0.290966	0.344354	0.414894	0.116227	0.038	0.066	0.125	0.007	0.038	0.105	1.03	1.08	1.14	1.02	1.22	1.23	1.08	1.15	1.07
P38701	40S ribosomal protein S20 OS=Saccharomyces cerevisiae (strain ATCC 204508 / S288c) GN=RPS20 PE=1 SV=3	40S ribosomal protein S20	RPS20	0	-0.156632	0.0403816	0.0379903	0.202192	-0.0118794	-0.0795049	-1.2271	0	-0.0743352	0.0984633	-0.0111681	0.112021	0.30379	0.157238	0.0812463	0	-0.0725702	0.00306234	0.263612	0.192028	0.117076	0.0613228	0.0527387	0.071	0.06	0.029	0.033	0.079	0.024	0.98	1.01	0.98	0.97	1.14	1.06	0.99	1.05	1.07
P07251	ATP synthase subunit alpha, mitochondrial OS=Saccharomyces cerevisiae (strain ATCC 204508 / S288c) GN=ATP1 PE=1 SV=5	ATP synthase subunit alpha, mitochondrial	ATP1	0	0.0387185	0.0438212	0.113835	0.23135	0.0631543	0.105639	0.244707	0	0.0351394	0.0882849	0.0223052	0.121621	0.182275	0.0506247	0.0709781	0	0.0858473	0.0207188	0.265404	0.238722	0.211844	0.213839	0.141674	0.017	0.031	0.031	0.021	0.05	0.028	1.02	1.03	1.03	1.06	1.07	1.14	1.02	1.09	1.07
Q08969	Protein GRE1 OS=Saccharomyces cerevisiae (strain ATCC 204508 / S288c) GN=GRE1 PE=1 SV=1	Protein GRE1	GRE1	0	-0.108725	-0.127086	-0.107765	0.0436815	-0.116427	-0.114498	-0.694264	0	0.0403138	0.0339751	-0.202291	0.141733	0.208962	0.0766396	0.331216	0	-0.0912795	-0.101452	-0.0294951	0.0805385	0.12147	0.112896	-0.10843	0.048	0.015	0.039	0.001	0.088	0.088	0.95	1.02	0.96	0.92	1.16	1.03	0.97	1.04	1.06
P33327	NAD-specific glutamate dehydrogenase OS=Saccharomyces cerevisiae (strain ATCC 204508 / S288c) GN=GDH2 PE=1 SV=1	NAD-specific glutamate dehydrogenase	GDH2	0	0.02031	0.0775518	0.254646	0.290674	-0.0319837	0.141045	-1.23561	0	-0.065142	0.0851257	0.0800446	0.148159	0.172105	0.136565	0.111747	0	0.0239294	0.0795833	0.28797	0.227616	0.195029	0.196369	0.0318901	0.028	0.052	0.028	0.085	0.021	0.064	1.02	1.01	1.02	1.04	1.1	1.1	1.02	1.08	1.06
P49095	Glycine dehydrogenase (decarboxylating), mitochondrial OS=Saccharomyces cerevisiae (strain ATCC 204508 / S288c) GN=GCV2 PE=1 SV=1	Glycine dehydrogenase (decarboxylating), mitochondrial	GCV2	0	0.117308	0.157791	0.242521	0.318402	0.130614	0.226677	-0.0941455	0	0.0286096	-0.0719381	-0.0654444	0.0546771	0.172903	0.0447068	0.0184569	0	0.329081	0.187537	0.305767	0.181009	0.34328	0.374131	0.0545851	0.056	0.036	0.113	0.047	0.058	0.118	1.07	0.99	1.13	1.13	1.06	1.2	1.06	1.13	1.06
P04912	Histone H2A.2 OS=Saccharomyces cerevisiae (strain ATCC 204508 / S288c) GN=HTA2 PE=1 SV=2	Histone H2A.2	HTA2	0	-0.531447	0.00344966	-0.412737	0.251662	-0.0751956	-0.0724693	-1.83689	0	-0.402547	-0.0171164	-0.905269	0.179681	0.201665	-0.0239909	-0.227906	0	-0.532492	-0.107663	-0.886817	0.10555	-0.00164766	-0.0422755	-0.406009	0.199	0.15	0.185	0.001	0.149	0.147	0.9	0.91	0.87	0.95	1	0.91	0.9	0.95	1.06
P52553	Prefoldin subunit 6 OS=Saccharomyces cerevisiae (strain ATCC 204508 / S288c) GN=YKE2 PE=1 SV=1	Prefoldin subunit 6	YKE2	0	-0.0409054	0.0205939	0.125723	0.254463	-0.0255762	-0.00403874	-0.89985	0	-0.075252	0.141039	-0.00506565	0.149726	0.317776	0.0521423	0.0700763	0	0.0214596	0.0266316	0.368272	0.103698	0.0993409	0.119382	0.2361	0.022	0.077	0.01	0.011	0.106	0.052	1	1.02	1.01	0.99	1.11	1.11	1.01	1.07	1.06
P38071	Enoyl-[acyl-carrier protein] reductase [NADPH, B-specific], mitochondrial OS=Saccharomyces cerevisiae (strain ATCC 204508 / S288c) GN=ETR1 PE=1 SV=3	Enoyl-[acyl-carrier protein] reductase [NADPH, B-specific], mitochondrial	ETR1	0	0.0926667	0.20155	0.156823	0.380343	0.178222	0.184467	-0.138878	0	0.0232549	0.122302	-0.0247711	0.218507	0.219146	0.17928	0.160758	0	-0.0249583	-0.0596385	0.185496	0.242963	0.159886	0.111718	-0.277263	0.07	0.046	0.021	0.003	0.021	0.158	1.07	1.03	0.98	1.13	1.14	1.01	1.03	1.09	1.06
P05750	40S ribosomal protein S3 OS=Saccharomyces cerevisiae (strain ATCC 204508 / S288c) GN=RPS3 PE=1 SV=5	40S ribosomal protein S3	RPS3	0	-0.123548	-0.0530973	0.0260263	0.132859	-0.130165	-0.163591	-1.97624	0	-0.074485	0.249265	0.204411	0.0773268	0.323332	0.115608	0.0640672	0	-0.0815646	-0.0923259	0.252899	0.142555	0.233585	0.180072	0.0769527	0.043	0.12	0.035	0.016	0.097	0.055	0.96	1.05	0.96	0.9	1.13	1.12	0.99	1.05	1.06
P15992	Heat shock protein 26 OS=Saccharomyces cerevisiae (strain ATCC 204508 / S288c) GN=HSP26 PE=1 SV=3	Heat shock protein 26	HSP26	0	-0.130972	-0.0984638	0.0948948	0.175711	0.0156603	-0.0722091	-0.75353	0	0.172844	0.272762	0.230068	0.188565	0.493406	0.242366	0.099264	0	-0.0767677	-0.0931157	0.315159	0.129854	0.0525667	0.00202001	-0.0246239	0.048	0.094	0.035	0.043	0.14	0.027	0.95	1.11	0.96	0.98	1.22	1.01	1.01	1.07	1.06
Q12159	RNA annealing protein YRA1 OS=Saccharomyces cerevisiae (strain ATCC 204508 / S288c) GN=YRA1 PE=1 SV=2	RNA annealing protein YRA1	YRA1	0	0.0722521	0.195787	0.0413408	0.243801	-0.0497776	0.193344	-0.195844	0	-0.0671142	-0.0161197	-0.0413916	-0.00437844	0.31081	0.194647	0.264248	0	0.140609	0.0815982	0.22017	0.164387	0.018536	0.204065	-0.0635651	0.069	0.024	0.049	0.119	0.04	0.097	1.07	0.98	1.05	1.05	1.2	1.04	1.03	1.1	1.06
P15625	Phenylalanine--tRNA ligase alpha subunit OS=Saccharomyces cerevisiae (strain ATCC 204508 / S288c) GN=FRS2 PE=1 SV=3	Phenylalanine--tRNA ligase alpha subunit	FRS2	0	0.0801931	0.196741	0.31687	0.362827	0.146312	0.247507	-1.2775	0	0.0308815	0.158889	-0.0238723	0.117035	0.318248	0.0952575	-0.023992	0	-0.0451585	0.0790083	0.268335	0.171127	0.216091	0.171521	-0.133109	0.069	0.059	0.044	0.05	0.122	0.127	1.07	1.05	1.01	1.15	1.1	1.07	1.04	1.1	1.06
P49166	60S ribosomal protein L37-A OS=Saccharomyces cerevisiae (strain ATCC 204508 / S288c) GN=RPL37A PE=1 SV=2	60S ribosomal protein L37-A	RPL37A	0	-0.0354987	-0.0176402	0.178065	0.163976	-0.163365	-0.062272	-2.25504	0	-0.150156	-0.000475431	0.104502	0.0188899	0.16129	0.0328968	0.00663963	0	-0.00409857	-0.162271	0.402707	0.115949	0.185979	0.23896	0.0542204	0.012	0.059	0.063	0.05	0.058	0.065	0.99	0.97	0.96	0.93	1.05	1.12	0.97	1.03	1.06
P32288	Glutamine synthetase OS=Saccharomyces cerevisiae (strain ATCC 204508 / S288c) GN=GLN1 PE=1 SV=4	Glutamine synthetase	GLN1	0	-0.135882	-0.0669325	0.0862786	0.0743822	-0.155844	-0.0472595	-1.28781	0	-0.0110645	0.252359	0.216191	0.0446045	0.266722	0.1056	0.0828846	0	0.0355534	0.0360236	0.467153	0.179286	0.21572	0.240687	0.217379	0.047	0.106	0.014	0.053	0.071	0.01	0.95	1.06	1.02	0.93	1.11	1.17	1.01	1.07	1.06
Q08964	Putative ISWI chromatin-remodeling complex subunit YPL216W OS=Saccharomyces cerevisiae (strain ATCC 204508 / S288c) GN=YPL216W PE=1 SV=1	Putative ISWI chromatin-remodeling complex subunit YPL216W	YPL216W	0	0.0829136	0.164043	0.206044	0.367529	0.0732892	0.240852	0.0161648	0	-0.129091	-0.55784	-0.258794	0.0282185	-0.169366	0.0380477	-0.00167723	0	0.0892673	-0.0387403	0.0968691	0.1157	0.0947012	0.140607	-0.152582	0.057	0.192	0.046	0.082	0.075	0.106	1.06	0.86	1.01	1.12	0.97	1.02	0.98	1.04	1.06
A6ZRW5	mRNA-decapping enzyme subunit 2 OS=Saccharomyces cerevisiae (strain YJM789) GN=DCP2 PE=3 SV=1	mRNA-decapping enzyme subunit 2	DCP2	0	0.0856768	0.0908664	0.0381111	0.291261	-0.0476736	0.284482	-0.558992	0	0.130787	0.111421	-0.14093	0.391816	0.196589	0.369573	0.373643	0	0.380655	-0.108524	0.164494	0.334419	0.0138722	-0.0568623	0.148863	0.035	0.048	0.184	0.162	0.069	0.073	1.04	1.06	1.08	1.09	1.24	1.03	1.06	1.12	1.06
P19262	Dihydrolipoyllysine-residue succinyltransferase component of 2-oxoglutarate dehydrogenase complex, mitochondrial OS=Saccharomyces cerevisiae (strain ATCC 204508 / S288c) GN=KGD2 PE=1 SV=2	Dihydrolipoyllysine-residue succinyltransferase component of 2-oxoglutarate dehydrogenase complex, mitochondrial	KGD2	0	0.12368	0.13369	0.26543	0.398053	-0.00344356	0.239709	-1.74449	0	0.163776	0.147685	0.189068	0.229297	0.266824	0.445358	0.212253	0	0.146334	0.0577617	-0.0642732	0.292076	0.210897	0.095759	-0.148863	0.051	0.061	0.051	0.119	0.086	0.124	1.06	1.08	1.05	1.09	1.24	1.04	1.06	1.12	1.06
P34223	UBX domain-containing protein 1 OS=Saccharomyces cerevisiae (strain ATCC 204508 / S288c) GN=SHP1 PE=1 SV=1	UBX domain-containing protein 1	SHP1	0	-0.103155	-0.0168092	0.0346745	0.0541206	-0.0701984	0.0321084	-1.58879	0	0.0860532	-0.0604395	-0.0642874	0.0903862	0.100088	0.105236	0.194889	0	-0.039337	-0.00690721	0.187468	0.0119187	0.00867789	0.0108392	0.201413	0.038	0.051	0.015	0.05	0.037	0.078	0.97	1.01	0.99	0.99	1.1	1.05	0.99	1.05	1.06
P37898	Alanine/arginine aminopeptidase OS=Saccharomyces cerevisiae (strain ATCC 204508 / S288c) GN=AAP1 PE=1 SV=2	Alanine/arginine aminopeptidase	AAP1	0	-0.00766441	-0.000594663	0.149146	0.149683	-0.0078352	0.0235877	-1.65358	0	0.0636311	0.0575504	-0.00306468	0.12768	0.21052	0.115721	0.039153	0	0.0652838	0.0637909	0.242448	0.221475	0.223408	0.212072	0.110813	0.003	0.024	0.026	0.015	0.06	0.042	1	1.03	1.03	1.01	1.09	1.14	1.02	1.08	1.06
P35719	Uncharacterized protein MRP8 OS=Saccharomyces cerevisiae (strain ATCC 204508 / S288c) GN=MRP8 PE=1 SV=1	Uncharacterized protein MRP8	MRP8	0	0.0402484	0.174528	-0.0351686	0.235679	0.064966	0.0806808	-1.2044	0	-0.0857547	0.110326	-0.128739	0.131007	0.183501	0.14884	0.110701	0	-0.160581	0.0456799	-0.159633	0.162043	0.141409	0.122816	-0.0835946	0.064	0.068	0.074	0.008	0.025	0.084	1.05	1.01	0.98	1.05	1.11	1.05	1.01	1.07	1.06
P40185	Protein MMF1, mitochondrial OS=Saccharomyces cerevisiae (strain ATCC 204508 / S288c) GN=MMF1 PE=1 SV=1	Protein MMF1, mitochondrial	MMF1	0	-0.191496	-0.217357	-0.145381	-0.0953556	-0.207245	-0.26819	-0.292558	0	-0.154611	0.353943	0.168315	0.173097	0.297187	0.0667413	0.066986	0	-0.262463	-0.10104	0.0931564	0.0925925	0.0648297	0.058635	0.272152	0.084	0.186	0.091	0.03	0.094	0.086	0.91	1.06	0.92	0.85	1.11	1.1	0.96	1.02	1.06
P48589	40S ribosomal protein S12 OS=Saccharomyces cerevisiae (strain ATCC 204508 / S288c) GN=RPS12 PE=1 SV=1	40S ribosomal protein S12	RPS12	0	0.0249557	-0.0237323	0.274269	0.155432	-0.0345741	-0.158082	-1.80891	0	0.0857538	0.148847	0.460261	0.156311	0.342194	0.157799	0.0352394	0	-0.0118965	-0.138824	0.627324	0.13544	0.265317	0.05659	0.157308	0.017	0.052	0.053	0.06	0.108	0.072	1	1.06	0.97	0.94	1.14	1.12	1.01	1.06	1.06
P39015	Suppressor protein STM1 OS=Saccharomyces cerevisiae (strain ATCC 204508 / S288c) GN=STM1 PE=1 SV=3	Suppressor protein STM1	STM1	0	-0.038458	-0.00486845	0.181911	0.187184	-0.0586329	-0.0778989	1.27712	0	-0.0511047	0.0962398	0.166044	0.147334	0.16395	0.0335859	0.0492894	0	-0.0197815	-0.0930781	0.322538	0.207639	0.224101	0.132644	0.149238	0.014	0.052	0.034	0.009	0.05	0.034	0.99	1.01	0.97	0.95	1.06	1.12	0.99	1.05	1.05
P41920	Ran-specific GTPase-activating protein 1 OS=Saccharomyces cerevisiae (strain ATCC 204508 / S288c) GN=YRB1 PE=1 SV=1	Ran-specific GTPase-activating protein 1	YRB1	0	-0.116667	-0.0967799	0.0187664	-0.110763	-0.192345	-0.231234	-1.09678	0	-0.118395	0.114035	-0.755825	0.148814	0.178918	-0.00625899	0.142039	0	-0.0528238	0.0809276	0.2321	0.272138	0.307382	0.206953	0.200051	0.044	0.08	0.047	0.019	0.067	0.042	0.95	1	1.01	0.86	1.08	1.18	0.99	1.04	1.05
P06115	Catalase T OS=Saccharomyces cerevisiae (strain ATCC 204508 / S288c) GN=CTT1 PE=1 SV=3	Catalase T	CTT1	0	-0.276387	0.179321	0.0768829	0.24425	0.0308996	0.127136	-1.44752	0	-0.224943	0.110247	-0.141754	0.158156	0.145791	0.0169908	0.0109978	0	-0.349028	-0.0276549	0.0596087	0.0727451	0.0648776	-0.178892	-0.163535	0.156	0.116	0.129	0.047	0.054	0.097	0.99	0.98	0.92	1.06	1.04	0.94	0.96	1.01	1.05
P25443	40S ribosomal protein S2 OS=Saccharomyces cerevisiae (strain ATCC 204508 / S288c) GN=RPS2 PE=1 SV=3	40S ribosomal protein S2	RPS2	0	-0.127433	0.0161713	0.0173195	0.259254	-0.0442308	-0.040642	-1.98498	0	0.0950919	0.419893	0.154254	0.121686	0.507491	0.191493	0.0757913	0	0.00452197	-0.109749	0.320531	0.208714	0.160057	0.164947	-0.0282031	0.054	0.157	0.044	0.002	0.159	0.075	0.98	1.14	0.98	0.97	1.21	1.07	1.03	1.08	1.05
P0CX82	60S ribosomal protein L19-A OS=Saccharomyces cerevisiae (strain ATCC 204508 / S288c) GN=RPL19A PE=1 SV=1	60S ribosomal protein L19-A	RPL19A	0	0.116952	0.174741	0.356575	0.348404	0.0260132	0.0213786	-1.48079	0	-0.049196	0.114086	0.0404656	-0.0191805	0.21308	-0.0306127	-0.0902136	0	0.144193	-0.0792	0.62608	0.0416544	0.286868	0.215153	0.371931	0.061	0.059	0.079	0.002	0.114	0.055	1.07	1.02	1.02	1.02	1.03	1.22	1.03	1.09	1.05
P15703	Glucan 1,3-beta-glucosidase OS=Saccharomyces cerevisiae (strain ATCC 204508 / S288c) GN=BGL2 PE=1 SV=1	Glucan 1,3-beta-glucosidase	BGL2	0	-0.0218594	-0.150454	0.0947549	0.0312709	-0.105081	-0.117131	-0.505525	0	-0.250676	0.185981	-0.125145	0.0992273	0.059464	0.00346478	0.04646	0	-0.0634896	-0.0634896	0.232645	0.118464	0.182991	0.108072	0.224188	0.055	0.15	0.026	0.006	0.02	0.041	0.96	0.99	0.97	0.93	1.03	1.13	0.98	1.03	1.05
P02309	Histone H4 OS=Saccharomyces cerevisiae (strain ATCC 204508 / S288c) GN=HHF1 PE=1 SV=2	Histone H4	HHF1	0	0.401443	0.0707152	0.467946	0.306542	0.163621	0.099743	-1.7859	0	0.252164	0.209096	0.258884	0.300838	0.460926	0.323131	0.0214975	0	0.221404	-0.0636067	0.575199	0.188751	0.287725	0.230927	0.0349117	0.154	0.091	0.106	0.031	0.151	0.09	1.12	1.12	1.04	1.1	1.21	1.14	1.09	1.15	1.05
P07280	40S ribosomal protein S19-A OS=Saccharomyces cerevisiae (strain ATCC 204508 / S288c) GN=RPS19A PE=1 SV=2	40S ribosomal protein S19-A	RPS19A	0	-0.138814	-0.215429	0.019814	0.00744324	-0.171373	-0.235191	-1.40306	0	0.0817712	0.395882	0.495848	0.211377	0.467133	0.254293	0.148711	0	0.167154	0.0739154	0.501763	0.206719	0.226698	0.18877	0.26288	0.076	0.149	0.058	0.031	0.114	0.026	0.92	1.12	1.06	0.87	1.23	1.17	1.04	1.09	1.05
P0CX51	40S ribosomal protein S16-A OS=Saccharomyces cerevisiae (strain ATCC 204508 / S288c) GN=RPS16A PE=1 SV=1	40S ribosomal protein S16-A	RPS16A	0	-0.0255032	0.0553554	0.0560924	0.166004	-0.103188	-0.000510779	-2.02941	0	0.113798	0.142782	0.197247	0.177637	0.332896	0.129075	-0.0114707	0	-0.108989	-0.00931977	0.359522	0.112974	0.13725	0.200462	0.149865	0.029	0.052	0.041	0.05	0.121	0.023	1.01	1.06	0.97	0.97	1.12	1.12	1.01	1.07	1.05
P0CX53	60S ribosomal protein L12-A OS=Saccharomyces cerevisiae (strain ATCC 204508 / S288c) GN=RPL12A PE=1 SV=1	60S ribosomal protein L12-A	RPL12A	0	-0.177174	-0.0460964	-0.204097	0.182572	-0.0651927	-0.130985	-1.19784	0	-0.105538	0.215434	0.0843482	0.0956604	0.342281	0.10502	-0.0676399	0	0.100332	0.101021	0.131116	0.374589	0.261435	0.321013	0.00412662	0.063	0.115	0.04	0.032	0.144	0.113	0.95	1.03	1.05	0.93	1.1	1.15	1.01	1.06	1.05
O14455	60S ribosomal protein L36-B OS=Saccharomyces cerevisiae (strain ATCC 204508 / S288c) GN=RPL36B PE=1 SV=3	60S ribosomal protein L36-B	RPL36B	0	-0.189141	-0.113372	-0.192542	0.0557375	-0.286427	-0.273451	-2.37414	0	-0.0451481	0.0718144	0.144121	0.132626	0.109281	0.117234	0.111	0	0.0666488	0.0330248	0.440777	0.26979	0.313802	0.32477	0.181896	0.066	0.041	0.023	0.006	0.003	0.054	0.93	1.01	1.02	0.82	1.08	1.21	0.99	1.04	1.05
P05744	60S ribosomal protein L33-A OS=Saccharomyces cerevisiae (strain ATCC 204508 / S288c) GN=RPL33A PE=1 SV=3	60S ribosomal protein L33-A	RPL33A	0	-0.0491362	0.181972	0.133737	0.375106	0.0473458	0.092521	-2.18205	0	-0.110048	-0.0867535	-0.211116	0.120983	0.127926	0.0377221	-0.0673935	0	-0.202388	-0.0193841	-0.00139256	0.0914556	0.073931	0.10597	-0.126987	0.086	0.041	0.076	0.022	0.068	0.085	1.03	0.96	0.95	1.05	1.02	1.01	0.98	1.03	1.05
P39516	40S ribosomal protein S14-B OS=Saccharomyces cerevisiae (strain ATCC 204508 / S288c) GN=RPS14B PE=1 SV=2	40S ribosomal protein S14-B	RPS14B	0	0.148006	0.111965	0.322819	0.360008	0.0920899	0.129578	-2.26176	0	-0.0572126	-0.0220313	-0.0449111	0.0500556	0.166482	0.109101	-0.145757	0	0.0496546	-0.122973	0.315701	0.173373	0.199145	0.175559	-0.121867	0.053	0.02	0.061	0.018	0.112	0.119	1.06	0.98	0.98	1.08	1.03	1.07	1.01	1.06	1.05
Q05775	Eukaryotic translation initiation factor 3 subunit J OS=Saccharomyces cerevisiae (strain ATCC 204508 / S288c) GN=HCR1 PE=1 SV=1	Eukaryotic translation initiation factor 3 subunit J	HCR1	0	-0.124232	0.24749	-0.121697	0.567007	0.129046	0.198783	-2.61758	0	-0.297098	-0.331039	-0.679922	0.0980588	-0.113329	-0.206252	-0.127115	0	-0.140275	-0.0569466	-0.164206	0.165354	0.0884488	0.0819237	-0.289643	0.134	0.13	0.049	0.034	0.034	0.143	1.03	0.87	0.96	1.12	0.9	0.98	0.95	1	1.05
P38841	Uncharacterized protein YHR138C OS=Saccharomyces cerevisiae (strain ATCC 204508 / S288c) GN=YHR138C PE=1 SV=1	Uncharacterized protein YHR138C	YHR138C	0	0.0910192	0.150173	-0.0171261	0.209726	0.112758	0.131299	-0.329356	0	0.244647	0.205277	0.306143	0.301758	0.333252	0.173229	0.121917	0	0.0118611	0.0368434	0.192248	0.264754	0.18598	0.0877897	0.107822	0.052	0.089	0.013	0.009	0.078	0.036	1.06	1.11	1.01	1.09	1.16	1.09	1.06	1.11	1.05
E7QIA1	Protein HRI1 OS=Saccharomyces cerevisiae (strain Zymaflore VL3) GN=HRI1 PE=3 SV=1	Protein HRI1	HRI1	0	-0.139326	-0.159529	-0.21171	-0.0211362	-0.160817	-0.161849	-0.46596	0	-0.168138	0.248971	-0.173852	0.106042	0.240209	0.0660548	0.0866213	0	-0.112636	0.116445	0.069537	0.121937	0.116751	0.200164	0.166608	0.061	0.147	0.079	0.001	0.067	0.029	0.93	1.03	1	0.89	1.1	1.12	0.99	1.04	1.05
P04050	DNA-directed RNA polymerase II subunit RPB1 OS=Saccharomyces cerevisiae (strain ATCC 204508 / S288c) GN=RPO21 PE=1 SV=2	DNA-directed RNA polymerase II subunit RPB1	RPO21	0	-0.0855305	0.131422	0.0631861	0.242948	0.00919779	0.121976	-1.16181	0	-0.163461	0.0245491	-0.268022	0.0528901	0.0594323	0.0312208	0.00624427	0	-0.0407733	0.0441156	0.00206608	0.183947	0.122388	0.163171	-0.0429017	0.076	0.069	0.029	0.055	0.018	0.074	1.01	0.97	1	1.05	1.02	1.06	0.99	1.04	1.05
P0CX46	60S ribosomal protein L2-B OS=Saccharomyces cerevisiae (strain ATCC 204508 / S288c) GN=RPL2B PE=1 SV=1	60S ribosomal protein L2-B	RPL2B	0	-0.0852222	-0.0681195	0.242938	0.0604746	-0.154622	-0.202134	-2.58541	0	0.0583655	0.319608	0.321384	0.191233	0.483914	0.205812	0.149138	0	-0.0698733	-0.164236	0.429534	0.0690136	0.095916	0.0201125	0.101773	0.031	0.121	0.057	0.023	0.128	0.031	0.97	1.1	0.95	0.88	1.22	1.05	1	1.05	1.05
P0CX43	60S ribosomal protein L1-A OS=Saccharomyces cerevisiae (strain ATCC 204508 / S288c) GN=RPL1A PE=1 SV=1	60S ribosomal protein L1-A	RPL1A	0	-0.251374	-0.0770717	-0.0628426	0.0193407	-0.172592	-0.291836	-2.63473	0	-0.0427136	0.290185	0.106433	0.16716	0.449257	0.110058	0.00337016	0	-0.127124	-0.124631	0.289956	0.108256	0.171024	0.098571	0.0535546	0.088	0.129	0.051	0.058	0.166	0.041	0.93	1.06	0.94	0.85	1.15	1.08	0.98	1.03	1.05
P05743	60S ribosomal protein L26-A OS=Saccharomyces cerevisiae (strain ATCC 204508 / S288c) GN=RPL26A PE=1 SV=3	60S ribosomal protein L26-A	RPL26A	0	-0.0344622	-0.0679892	0.256662	0.117194	-0.0575108	-0.175748	-0.904067	0	0.0478581	0.255162	0.340648	0.202345	0.46614	0.16568	0.046351	0	-0.000186022	-0.0520817	0.49134	0.1743	0.181371	0.119193	0.0464894	0.024	0.096	0.021	0.058	0.154	0.047	0.98	1.08	0.99	0.92	1.18	1.08	1.01	1.06	1.05
P00445	Superoxide dismutase [Cu-Zn] OS=Saccharomyces cerevisiae (strain ATCC 204508 / S288c) GN=SOD1 PE=1 SV=2	Superoxide dismutase [Cu-Zn]	SOD1	0	-0.223303	-0.0256073	-0.393854	0.196115	-0.0381829	-0.0273042	-0.0548405	0	-0.391297	-0.163244	-0.364239	0.053992	-0.1352	-0.0187133	0.0224993	0	-0.152156	0.168346	-0.176896	0.248683	0.116392	0.046159	-0.0571578	0.083	0.134	0.111	0.005	0.056	0.06	0.95	0.89	1.01	0.98	0.97	1.03	0.95	0.99	1.05
P00427	Cytochrome c oxidase subunit 6, mitochondrial OS=Saccharomyces cerevisiae (strain ATCC 204508 / S288c) GN=COX6 PE=1 SV=1	Cytochrome c oxidase subunit 6, mitochondrial	COX6	0	0.075437	0.117257	-0.313073	0.276675	0.0636443	0.113388	-1.77294	0	-0.0510646	-0.455758	-0.12555	0.040495	-0.34406	0.0716489	0.208749	0	0.156464	0.112651	-0.277099	0.247796	0.183211	0.295566	-0.136911	0.041	0.164	0.055	0.024	0.19	0.15	1.05	0.9	1.07	1.06	1	1.09	1	1.05	1.05
P38205	Multisite-specific tRNA:(cytosine-C(5))-methyltransferase OS=Saccharomyces cerevisiae (strain ATCC 204508 / S288c) GN=NCL1 PE=1 SV=1	Multisite-specific tRNA:(cytosine-C(5))-methyltransferase	NCL1	0	0.118905	0.0992051	0.235987	0.36697	0.166379	0.00212317	0.488055	0	0.00632608	-0.0479868	-0.0796471	0.105254	0.167418	-0.0270202	0.0640691	0	0.00769922	-0.260584	0.333417	0.0301087	0.106331	-0.0256567	-0.000908498	0.044	0.02	0.102	0.08	0.068	0.049	1.05	0.99	0.95	1.06	1.05	1.02	1	1.04	1.05
P35189	Transcription initiation factor TFIID subunit 14 OS=Saccharomyces cerevisiae (strain ATCC 204508 / S288c) GN=TAF14 PE=1 SV=1	Transcription initiation factor TFIID subunit 14	TAF14	0	0.160364	0.179002	0.094062	0.315434	0.0724751	0.17056	-0.877649	0	0.130308	-0.0964628	0.249815	0.183419	-0.0108068	0.0683371	0.125381	0	-0.103798	-0.131507	-0.011059	0.119132	0.127866	0.0434074	0.0487427	0.067	0.079	0.049	0.048	0.047	0.033	1.08	1.01	0.95	1.09	1.04	1.05	1.01	1.06	1.05
P54838	Dihydroxyacetone kinase 1 OS=Saccharomyces cerevisiae (strain ATCC 204508 / S288c) GN=DAK1 PE=1 SV=1	Dihydroxyacetone kinase 1	DAK1	0	-0.0654933	0.0187682	0.206069	0.158527	-0.00600669	-0.0115806	-1.30927	0	0.0197904	0.20206	0.230559	0.230951	0.252856	0.121642	0.0751115	0	-0.0345025	0.00420417	0.220675	0.148116	0.127677	0.127019	0.0450879	0.03	0.079	0.015	0.003	0.065	0.033	0.99	1.05	0.99	0.99	1.11	1.07	1.01	1.06	1.05
P15202	Peroxisomal catalase A OS=Saccharomyces cerevisiae (strain ATCC 204508 / S288c) GN=CTA1 PE=1 SV=1	Peroxisomal catalase A	CTA1	0	0.0120492	0.19139	-0.0238811	0.311386	0.132017	0.17164	-0.835692	0	-0.0814406	0.156078	-0.251366	0.110028	0.196831	0.0570341	0.042201	0	-0.021066	0.171617	-0.0265331	0.179553	0.164704	0.191375	-0.0938067	0.076	0.085	0.075	0.019	0.06	0.106	1.05	1.02	1.04	1.11	1.07	1.07	1.04	1.08	1.05
P40011	4-hydroxy-4-methyl-2-oxoglutarate aldolase OS=Saccharomyces cerevisiae (strain ATCC 204508 / S288c) GN=YER010C PE=1 SV=1	4-hydroxy-4-methyl-2-oxoglutarate aldolase	YER010C	0	0.0965328	0.0167757	0.198084	0.254573	-0.0500738	0.0347319	0.0686473	0	-0.169583	-0.0529233	-0.19597	-0.088831	0.11432	0.0217155	0.113056	0	-0.0808996	-0.188247	0.128098	0.172168	-0.00853037	0.0705412	-0.0820245	0.036	0.059	0.065	0.042	0.036	0.053	1.03	0.95	0.94	1	1.06	1	0.97	1.02	1.05
P40069	Importin subunit beta-4 OS=Saccharomyces cerevisiae (strain ATCC 204508 / S288c) GN=KAP123 PE=1 SV=1	Importin subunit beta-4	KAP123	0	0.0131812	0.00745581	0.230091	0.236088	0.0123344	-0.0987731	-1.82996	0	0.111394	0.208678	0.20546	0.20546	0.378018	0.223212	0.128482	0	-0.0101242	-0.0303593	0.348276	0.182154	0.169053	0.0878452	-0.0308173	0.005	0.072	0.011	0.054	0.088	0.069	1	1.08	0.99	0.97	1.19	1.06	1.02	1.07	1.05
Q3E7B7	SERF-like protein YDL085C-A OS=Saccharomyces cerevisiae (strain ATCC 204508 / S288c) GN=YDL085C-A PE=1 SV=1	SERF-like protein YDL085C-A	YDL085C-A	0	0.0214531	0.165716	-0.212073	0.0107664	0.0991754	-0.0438876	-0.256565	0	0.0972636	0.174733	-0.334756	-0.143087	0.158182	0.132993	0.110228	0	0.381932	0.51064	0.355571	0.393937	0.512477	0.47152	0.425473	0.063	0.06	0.176	0.07	0.017	0.03	1.05	1.07	1.24	1.02	1.1	1.39	1.12	1.17	1.04
P00360	Glyceraldehyde-3-phosphate dehydrogenase 1 OS=Saccharomyces cerevisiae (strain ATCC 204508 / S288c) GN=TDH1 PE=1 SV=3	Glyceraldehyde-3-phosphate dehydrogenase 1	TDH1	0	-0.0248739	-0.138823	0.152661	0.0457003	-0.0245596	-0.176281	-0.105145	0	-0.0102212	0.272644	0.196567	0.123538	0.298759	-0.0996632	0.147415	0	-0.13387	-0.0908195	0.30501	0.104067	0.185453	-0.202606	0.329069	0.051	0.115	0.048	0.074	0.137	0.182	0.96	1.07	0.95	0.93	1.09	1.09	0.99	1.04	1.04
P32324	Elongation factor 2 OS=Saccharomyces cerevisiae (strain ATCC 204508 / S288c) GN=EFT1 PE=1 SV=1	Elongation factor 2	EFT1	0	-0.0142192	0.0260572	0.429442	0.218499	-0.0256728	-0.0693815	-1.63681	0	0.0622154	0.231277	0.201158	0.176251	0.399688	0.137232	0.0504766	0	-0.0121849	-0.0701459	0.497703	0.14186	0.15237	0.0995769	0.0456979	0.014	0.084	0.026	0.021	0.129	0.037	1	1.07	0.98	0.97	1.15	1.07	1.02	1.06	1.04
P43569	CCR4-associated factor 16 OS=Saccharomyces cerevisiae (strain ATCC 204508 / S288c) GN=CAF16 PE=1 SV=1	CCR4-associated factor 16	CAF16	0	-0.0795468	-0.356064	-0.0691	-0.132946	-0.220409	-0.325902	-0.394676	0	0.124818	0.0586372	0.105082	0.208587	0.198378	0.183398	0.279856	0	-0.0730791	-0.0243601	0.109286	-0.0157872	0.112082	0.112641	0.0504386	0.125	0.043	0.026	0.052	0.036	0.025	0.91	1.04	0.98	0.83	1.17	1.07	0.98	1.02	1.04
P02829	ATP-dependent molecular chaperone HSP82 OS=Saccharomyces cerevisiae (strain ATCC 204508 / S288c) GN=HSP82 PE=1 SV=1	ATP-dependent molecular chaperone HSP82	HSP82	0	-0.0362806	-0.0167478	0.225037	0.1944	-0.0464671	-0.0337574	-2.84941	0	0.0228502	0.280148	0.134343	0.172532	0.433103	0.136364	0.0210256	0	-0.0715353	-0.108358	0.233794	0.122753	0.147988	-0.0945041	0.0492722	0.013	0.111	0.038	0.006	0.151	0.084	0.99	1.08	0.96	0.97	1.15	1.03	1.01	1.05	1.04
P33442	40S ribosomal protein S1-A OS=Saccharomyces cerevisiae (strain ATCC 204508 / S288c) GN=RPS1A PE=1 SV=2	40S ribosomal protein S1-A	RPS1A	0	0.0149356	0.0393738	0.228863	0.212606	-0.105587	-0.0168388	-2.45711	0	0.0251461	0.176023	0.250349	0.179556	0.328266	0.203773	0.0756783	0	0.0975845	0.025145	0.391294	0.21258	0.23356	0.15867	0.0490119	0.014	0.067	0.035	0.043	0.087	0.064	1.01	1.05	1.03	0.96	1.15	1.11	1.03	1.07	1.04
P15873	Proliferating cell nuclear antigen OS=Saccharomyces cerevisiae (strain ATCC 204508 / S288c) GN=POL30 PE=1 SV=1	Proliferating cell nuclear antigen	POL30	0	0.134898	0.0258993	0.156417	0.199609	0.0266024	0.0900297	-1.91384	0	0.033129	0.112278	-0.0328213	0.0721646	0.218271	0.0601427	0.0108769	0	-0.0753763	-0.0882216	0.192671	-0.00226467	0.0939706	0.0437644	0.0802204	0.05	0.04	0.033	0.031	0.076	0.018	1.04	1.03	0.96	1.04	1.07	1.05	1.01	1.05	1.04
A6ZQJ1	ATP-dependent RNA helicase eIF4A OS=Saccharomyces cerevisiae (strain YJM789) GN=TIF1 PE=3 SV=1	ATP-dependent RNA helicase eIF4A	TIF1	0	0.00400106	0.0125932	0.152042	0.180813	0.00337418	-0.0554967	-1.24461	0	0.0265151	0.248532	0.121507	0.206178	0.381234	0.161276	0.0359118	0	0.0023988	0.0190796	0.248435	0.244158	0.235065	0.122315	-0.0549374	0.004	0.097	0.007	0.029	0.123	0.1	1	1.07	1	0.98	1.15	1.08	1.03	1.07	1.04
P17106	Centromere-binding protein 1 OS=Saccharomyces cerevisiae (strain ATCC 204508 / S288c) GN=CBF1 PE=1 SV=2	Centromere-binding protein 1	CBF1	0	0.00204435	-0.0838106	-0.0700007	0.138396	0.0946174	0.0391523	-0.608891	0	0.259316	-0.288888	-0.0395284	0.39682	0.268594	0.13801	0.2824	0	-0.00904514	0.156697	0.113891	0.303259	0.08625	-0.14273	-0.307509	0.034	0.188	0.066	0.027	0.054	0.138	0.98	1.01	1.04	1.05	1.17	0.93	1.01	1.05	1.04
P14127	40S ribosomal protein S17-B OS=Saccharomyces cerevisiae (strain ATCC 204508 / S288c) GN=RPS17B PE=1 SV=1	40S ribosomal protein S17-B	RPS17B	0	-0.00825648	0.0674884	0.150404	0.224121	-0.0844291	-0.0601588	-1.83268	0	-0.0168039	0.142446	0.123401	0.129434	0.269419	0.105894	0.0153395	0	0.0656536	-0.0212613	0.380444	0.150773	0.223467	0.176334	0.124246	0.029	0.062	0.032	0.012	0.09	0.034	1.01	1.03	1.01	0.95	1.1	1.13	1.02	1.06	1.04
P40212	60S ribosomal protein L13-B OS=Saccharomyces cerevisiae (strain ATCC 204508 / S288c) GN=RPL13B PE=1 SV=1	60S ribosomal protein L13-B	RPL13B	0	-0.202602	-0.158968	-0.15352	0.0375948	-0.207297	-0.321775	-2.21461	0	0.11358	0.267519	0.587494	0.205744	0.432439	0.269432	0.108675	0	-0.292099	-0.0484287	-0.0620938	0.112838	0.0217546	0.0804127	-0.0283739	0.075	0.094	0.105	0.056	0.112	0.038	0.92	1.1	0.93	0.83	1.21	1.02	0.98	1.02	1.04
P07262	NADP-specific glutamate dehydrogenase 1 OS=Saccharomyces cerevisiae (strain ATCC 204508 / S288c) GN=GDH1 PE=1 SV=2	NADP-specific glutamate dehydrogenase 1	GDH1	0	0.0583947	0.0725216	-0.144682	0.401112	0.0964835	0.18448	-0.103401	0	-0.191826	-0.0505578	-0.464936	-0.00574398	0.0853256	0.0189831	-0.136167	0	0.108619	0.0806833	-0.0240637	0.245299	0.118145	0.1488	-0.0883445	0.026	0.068	0.039	0.043	0.078	0.087	1.03	0.95	1.05	1.1	0.99	1.04	1.01	1.05	1.04
P43577	Glucosamine 6-phosphate N-acetyltransferase OS=Saccharomyces cerevisiae (strain ATCC 204508 / S288c) GN=GNA1 PE=1 SV=1	Glucosamine 6-phosphate N-acetyltransferase	GNA1	0	0.403356	0.0563729	0.228928	0.120732	0.0779305	0.136383	-0.0765964	0	0.296919	0.201281	0.166492	0.184706	0.451387	0.0666466	0.199396	0	0.126026	-0.162968	0.425403	0.00866212	0.0959645	0.0787484	0.244241	0.157	0.103	0.1	0.029	0.138	0.064	1.12	1.13	0.99	1.08	1.19	1.1	1.08	1.12	1.04
P53889	Uncharacterized mitochondrial hydrolase FMP41 OS=Saccharomyces cerevisiae (strain ATCC 204508 / S288c) GN=FMP41 PE=1 SV=1	Uncharacterized mitochondrial hydrolase FMP41	FMP41	0	-0.0199516	0.148947	0.154251	0.339599	0.0882816	0.14314	0.144109	0	-0.0432685	-0.0587472	0.0148643	0.180288	0.0715816	0.0222394	-0.0767092	0	-0.231839	0.0370621	-0.386363	0.117703	0.0405427	-0.0274326	-0.0457691	0.065	0.021	0.098	0.027	0.052	0.032	1.03	0.98	0.96	1.08	1	0.99	0.99	1.03	1.04
Q3E757	60S ribosomal protein L11-B OS=Saccharomyces cerevisiae (strain ATCC 204508 / S288c) GN=RPL11B PE=1 SV=3	60S ribosomal protein L11-B	RPL11B	0	-0.0370491	0.052626	0.0776853	0.264232	-0.0678544	-0.0806537	-3.91452	0	-0.0353781	0.0153676	-0.0399576	0.156812	0.192531	0.0895317	0.0111107	0	0.0398688	-0.0312559	0.293198	0.263836	0.241827	0.179083	-0.0664382	0.031	0.018	0.025	0.006	0.063	0.11	1	1	1	0.95	1.07	1.09	1	1.04	1.04
P46654	40S ribosomal protein S0-B OS=Saccharomyces cerevisiae (strain ATCC 204508 / S288c) GN=RPS0B PE=1 SV=2	40S ribosomal protein S0-B	RPS0B	0	-0.302223	-0.44849	-0.236634	-0.364353	-0.571141	-0.695064	-2.51255	0	0.000514605	0.274526	0.283434	0.103271	0.394693	0.124673	-0.0121464	0	0.00765144	0.0196506	0.80441	0.112959	0.191787	0.288846	0.480747	0.162	0.113	0.007	0.061	0.146	0.103	0.85	1.07	1.01	0.65	1.13	1.25	0.97	1.01	1.04
P36154	Altered inheritance rate of mitochondria protein 29 OS=Saccharomyces cerevisiae (strain ATCC 204508 / S288c) GN=AIM29 PE=1 SV=1	Altered inheritance rate of mitochondria protein 29	AIM29	0	-0.205171	-0.0487276	-0.453859	0.275299	-0.122397	-0.131264	-1.5002	0	-0.0743545	-0.0945546	-0.25113	0.167017	-0.0661184	-0.0101216	0.102024	0	-0.0769531	0.0461702	-0.0970245	0.52101	0.199309	0.235735	-0.123755	0.073	0.035	0.043	0.004	0.06	0.132	0.94	0.96	0.99	0.92	1.01	1.08	0.97	1	1.04
P40037	Protein HMF1 OS=Saccharomyces cerevisiae (strain ATCC 204508 / S288c) GN=HMF1 PE=1 SV=1	Protein HMF1	HMF1	0	-0.073242	-0.103901	0.0198123	-0.0146587	-0.0988653	-0.0815552	-0.23212	0	-0.0387777	0.183126	0.455077	0.0710031	0.255634	0.105236	0.0359383	0	0.2273	-0.00328072	0.736228	0.0609567	0.143004	0.0977869	0.248833	0.037	0.084	0.094	0.008	0.079	0.054	0.96	1.04	1.06	0.94	1.1	1.12	1.02	1.05	1.03
P26321	60S ribosomal protein L5 OS=Saccharomyces cerevisiae (strain ATCC 204508 / S288c) GN=RPL5 PE=1 SV=4	60S ribosomal protein L5	RPL5	0	-0.154962	-0.172908	0.05181	0.0192431	-0.291097	-0.378474	-3.31472	0	0.044708	0.356877	0.413	0.215629	0.473699	0.186614	0.128443	0	0.0743322	-0.0713846	0.421197	0.316587	0.285078	0.156198	0.115052	0.067	0.139	0.051	0.043	0.132	0.062	0.93	1.1	1	0.79	1.21	1.14	1.01	1.05	1.03
P0CX24	60S ribosomal protein L20-B OS=Saccharomyces cerevisiae (strain ATCC 204508 / S288c) GN=RPL20B PE=1 SV=1	60S ribosomal protein L20-B	RPL20B	0	-0.0656157	-0.0724063	0.178823	0.14143	-0.189216	-0.199429	-2.50512	0	0.0553476	0.305593	0.302031	0.212536	0.322099	0.117683	0.022178	0	0.0571629	-0.0201071	0.575581	0.220519	0.261666	0.241187	0.219783	0.028	0.116	0.028	0.005	0.108	0.015	0.97	1.09	1.01	0.87	1.12	1.18	1.02	1.06	1.03
P16140	V-type proton ATPase subunit B OS=Saccharomyces cerevisiae (strain ATCC 204508 / S288c) GN=VMA2 PE=1 SV=2	V-type proton ATPase subunit B	VMA2	0	-0.114981	0.103829	0.0112818	0.128578	-0.00441794	0.0341663	-1.12613	0	-0.143032	0.208584	-0.0663628	0.0548189	0.144264	0.031789	-0.0297977	0	-0.0701275	-0.0257714	0.186995	0.112888	0.103597	0.091834	0.0183506	0.076	0.124	0.025	0.019	0.062	0.032	1	1.02	0.98	1.01	1.04	1.05	1	1.03	1.03
P06101	Hsp90 co-chaperone Cdc37 OS=Saccharomyces cerevisiae (strain ATCC 204508 / S288c) GN=CDC37 PE=1 SV=2	Hsp90 co-chaperone Cdc37	CDC37	0	-0.126842	0.0182975	-0.101138	0.250033	-0.0719514	-0.0405962	-1.33224	0	-0.0604978	0.0846359	-0.107046	0.127502	0.193305	0.0781996	0.0644264	0	-0.0436036	-0.0215712	-0.0490975	0.190454	0.129602	0.115417	-0.17397	0.054	0.051	0.015	0.015	0.05	0.114	0.98	1.01	0.99	0.96	1.08	1.02	0.99	1.02	1.03
P05317	60S acidic ribosomal protein P0 OS=Saccharomyces cerevisiae (strain ATCC 204508 / S288c) GN=RPP0 PE=1 SV=2	60S acidic ribosomal protein P0	RPP0	0	-0.0238008	-0.125567	0.211051	0.0740006	-0.167517	-0.18262	-1.8631	0	0.190965	0.3797	0.638028	0.243261	0.519935	0.340208	0.0909327	0	0.108617	0.0529182	0.489286	0.265537	0.236918	0.0726775	0.148753	0.046	0.131	0.038	0.007	0.147	0.057	0.97	1.15	1.04	0.89	1.25	1.11	1.05	1.08	1.03
P0CX56	40S ribosomal protein S18-B OS=Saccharomyces cerevisiae (strain ATCC 204508 / S288c) GN=RPS18B PE=1 SV=1	40S ribosomal protein S18-B	RPS18B	0	0.0712335	0.0466999	0.297521	0.267288	0.0269984	-0.0414022	-2.32571	0	0.0405049	0.148448	0.177248	0.177178	0.324696	0.104326	0.0682572	0	0.104204	-0.0513716	0.351424	0.184268	0.18312	0.0509616	0.0196315	0.025	0.054	0.055	0.034	0.099	0.061	1.03	1.05	1.01	1	1.13	1.06	1.03	1.06	1.03
P0CX30	40S ribosomal protein S23-B OS=Saccharomyces cerevisiae (strain ATCC 204508 / S288c) GN=RPS23B PE=1 SV=1	40S ribosomal protein S23-B	RPS23B	0	-0.179996	-0.108053	0.289018	0.169946	-0.0879071	-0.164629	-3.04824	0	-0.00024958	0.31968	0.166677	0.194422	0.441557	0.105596	-0.120978	0	-0.0804445	-0.11081	0.531962	0.0378816	0.126423	-0.0753804	0.0824827	0.063	0.132	0.04	0.038	0.199	0.072	0.94	1.08	0.96	0.92	1.12	1.03	0.99	1.02	1.03
P39939	40S ribosomal protein S26-B OS=Saccharomyces cerevisiae (strain ATCC 204508 / S288c) GN=RPS26B PE=1 SV=1	40S ribosomal protein S26-B	RPS26B	0	0.196891	-0.00614667	0.31977	0.138483	-0.181167	-0.0871492	-2.24714	0	-0.0372596	0.182934	0.126023	0.0674238	0.487922	0.159544	0.0137842	0	-0.0694412	-0.324389	0.368996	0.0642372	0.0122426	-0.0573284	0.0618835	0.082	0.083	0.115	0.046	0.173	0.041	1.05	1.04	0.92	0.91	1.18	1	1	1.03	1.03
Q03629	Uncharacterized protein YML079W OS=Saccharomyces cerevisiae (strain ATCC 204508 / S288c) GN=YML079W PE=1 SV=1	Uncharacterized protein YML079W	YML079W	0	-0.195774	-0.0267281	-0.511451	-0.159314	-0.191823	-0.194456	-0.180035	0	0.172467	-0.209096	0.118117	0.190138	-0.00573637	-0.13179	0.0450879	0	0.16711	0.0321804	-0.0741909	0.316857	0.195805	0.428533	0.272644	0.072	0.131	0.062	0.001	0.062	0.083	0.95	1	1.05	0.87	0.98	1.23	1	1.03	1.03
P14120	60S ribosomal protein L30 OS=Saccharomyces cerevisiae (strain ATCC 204508 / S288c) GN=RPL30 PE=1 SV=3	60S ribosomal protein L30	RPL30	0	-0.0153643	-0.179728	0.177281	0.0623827	-0.183195	-0.224942	-1.72855	0	0.222998	0.329543	0.493024	0.281996	0.487848	0.152245	0.0726669	0	0.0556534	-0.0640631	0.560414	0.189311	0.194925	0.195787	0.139565	0.068	0.114	0.041	0.02	0.158	0.022	0.96	1.14	1	0.87	1.19	1.13	1.03	1.06	1.03
P26784	60S ribosomal protein L16-A OS=Saccharomyces cerevisiae (strain ATCC 204508 / S288c) GN=RPL16A PE=1 SV=3	60S ribosomal protein L16-A	RPL16A	0	-0.121495	-0.031777	0.171798	0.0445335	-0.0538877	-0.0942342	-1.78265	0	-0.0786903	0.199648	-0.0778736	0.0937378	0.229514	0.0253044	-0.0270167	0	-0.119169	0.117551	0.131409	0.0894292	0.0899362	0.041481	0.192645	0.043	0.101	0.082	0.02	0.096	0.054	0.97	1.03	1	0.95	1.06	1.08	1	1.03	1.03
P05739	60S ribosomal protein L6-B OS=Saccharomyces cerevisiae (strain ATCC 204508 / S288c) GN=RPL6B PE=1 SV=4	60S ribosomal protein L6-B	RPL6B	0	-0.28915	-0.00107094	-0.0766724	0.0857222	-0.148276	-0.18067	-2.00872	0	-0.123624	0.332737	0.0616299	0.130721	0.387333	0.228524	-0.0556525	0	-0.281723	-0.119671	0.0764508	-0.0762544	-0.069673	-0.147123	0.0186493	0.111	0.168	0.097	0.016	0.152	0.058	0.94	1.06	0.91	0.89	1.15	0.96	0.97	1	1.03
P05737	60S ribosomal protein L7-A OS=Saccharomyces cerevisiae (strain ATCC 204508 / S288c) GN=RPL7A PE=1 SV=3	60S ribosomal protein L7-A	RPL7A	0	-0.180169	-0.0794968	0.0102397	0.10721	-0.176431	-0.233753	-2.54461	0	-0.122875	0.210363	0.00742879	0.15553	0.346182	0.0527235	-0.0241073	0	-0.103726	-0.115061	0.225851	0.130801	0.0796388	0.103269	-0.0270946	0.062	0.118	0.044	0.028	0.139	0.048	0.94	1.03	0.95	0.87	1.1	1.04	0.97	1	1.03
P06738	Glycogen phosphorylase OS=Saccharomyces cerevisiae (strain ATCC 204508 / S288c) GN=GPH1 PE=1 SV=4	Glycogen phosphorylase	GPH1	0	0.0287872	0.0955762	0.0891654	0.219245	0.0427995	0.0170435	-1.46669	0	0.0548531	0.26884	-0.00518609	0.125568	0.281551	0.167919	0.0633713	0	0.0376923	0.0532574	0.215927	0.141905	0.114871	0.140394	0.0322194	0.034	0.101	0.019	0.013	0.076	0.039	1.03	1.08	1.02	1.02	1.13	1.07	1.04	1.07	1.03
P02293	Histone H2B.1 OS=Saccharomyces cerevisiae (strain ATCC 204508 / S288c) GN=HTB1 PE=1 SV=2	Histone H2B.1	HTB1	0	0.0798663	-0.122956	0.232176	0.154574	-0.0384075	-0.132044	-1.86423	0	0.270388	0.218009	0.60058	0.242819	0.384216	0.250888	-0.0939522	0	0.239314	0.0524387	0.748832	0.295058	0.286283	0.307255	0.128056	0.07	0.097	0.089	0.046	0.165	0.067	0.99	1.12	1.07	0.94	1.14	1.18	1.06	1.09	1.03
P26786	40S ribosomal protein S7-A OS=Saccharomyces cerevisiae (strain ATCC 204508 / S288c) GN=RPS7A PE=1 SV=4	40S ribosomal protein S7-A	RPS7A	0	0.0188538	0.0329807	0.252777	0.294094	-0.0739796	0.0362961	-2.69277	0	0.0322109	0.0243709	0.112741	0.130974	0.164651	0.00767864	-0.0691462	0	0.0483495	-0.0457905	0.343805	0.231902	0.210284	0.223329	-0.0996527	0.011	0.012	0.033	0.054	0.084	0.122	1.01	1.01	1	0.99	1.03	1.09	1.01	1.03	1.02
P33331	Nuclear transport factor 2 OS=Saccharomyces cerevisiae (strain ATCC 204508 / S288c) GN=NTF2 PE=1 SV=2	Nuclear transport factor 2	NTF2	0	-0.271695	0.158019	-0.208207	0.251995	-0.00857899	0.0081233	-0.983799	0	-0.491915	-0.0206245	-0.850774	0.0111863	-0.0787367	-0.377653	-0.318794	0	-0.336397	0.0391679	-0.139596	0.103491	0.0838927	0.0950025	0.00996737	0.147	0.181	0.137	0.008	0.112	0.032	0.98	0.9	0.94	1	0.84	1.04	0.94	0.96	1.02
P28495	F-actin-capping protein subunit alpha OS=Saccharomyces cerevisiae (strain ATCC 204508 / S288c) GN=CAP1 PE=1 SV=1	F-actin-capping protein subunit alpha	CAP1	0	-0.130666	-0.0167861	-0.0379225	0.0911942	-0.0975233	-0.0897432	-1.668	0	-0.142283	0.0604708	0.0497355	0.0818998	0.104361	0.0584888	-0.0949695	0	-0.196217	-0.109809	0.0672627	-0.0221089	0.0377799	-0.0185581	-0.0602948	0.049	0.071	0.068	0.004	0.071	0.034	0.97	0.98	0.93	0.94	1.02	0.99	0.96	0.98	1.02
Q01855	40S ribosomal protein S15 OS=Saccharomyces cerevisiae (strain ATCC 204508 / S288c) GN=RPS15 PE=1 SV=1	40S ribosomal protein S15	RPS15	0	-0.210715	-0.0600474	0.283834	-0.00115369	-0.31876	-0.198754	-2.38198	0	-0.111443	0.393576	0.272309	0.0869442	0.427836	0.0876357	-0.0470364	0	-0.123111	0.0912644	0.757564	0.138714	0.234846	0.0894767	0.1559	0.074	0.191	0.074	0.059	0.174	0.051	0.94	1.08	0.99	0.84	1.13	1.12	1.01	1.03	1.02
P05319	60S acidic ribosomal protein P2-alpha OS=Saccharomyces cerevisiae (strain ATCC 204508 / S288c) GN=RPP2A PE=1 SV=1	60S acidic ribosomal protein P2-alpha	RPP2A	0	0.000293499	0.00936248	0.258379	0.202336	-0.0332556	-0.102159	-2.9433	0	0.0686359	0.145075	0.231797	0.209122	0.311131	0.12315	0.0305751	0	0.0257044	-0.145851	0.379856	0.144778	0.113899	0.0529951	-0.0844503	0.004	0.05	0.063	0.034	0.101	0.07	1	1.05	0.97	0.95	1.12	1.02	1.01	1.03	1.02
P46990	60S ribosomal protein L17-B OS=Saccharomyces cerevisiae (strain ATCC 204508 / S288c) GN=RPL17B PE=1 SV=2	60S ribosomal protein L17-B	RPL17B	0	0.0314167	0.126243	0.217323	0.226749	0.108223	-0.00734821	-0.929669	0	-0.0250185	0.281971	0.104945	0.0751713	0.159013	0.14288	0.139131	0	0.166915	0.174313	0.244527	0.232173	0.291209	0.166915	-0.018859	0.046	0.122	0.067	0.057	0.007	0.107	1.04	1.07	1.08	1.04	1.11	1.11	1.06	1.08	1.02
P0CX25	60S ribosomal protein L43-A OS=Saccharomyces cerevisiae (strain ATCC 204508 / S288c) GN=RPL43A PE=1 SV=1	60S ribosomal protein L43-A	RPL43A	0	-0.0886506	-0.026571	0.159184	-0.0457069	-0.106121	-0.216406	-1.03474	0	0.00740576	0.430376	0.304691	0.0729436	0.52391	0.154229	0.16802	0	0.117801	0.0638674	0.399383	0.0853984	0.0352404	0.0545821	0.207458	0.031	0.178	0.041	0.054	0.151	0.067	0.97	1.12	1.04	0.89	1.22	1.07	1.05	1.06	1.02
P04456	60S ribosomal protein L25 OS=Saccharomyces cerevisiae (strain ATCC 204508 / S288c) GN=RPL25 PE=1 SV=4	60S ribosomal protein L25	RPL25	0	0.0264136	0.0875766	0.0934318	0.213613	-0.0599152	-0.0201325	-1.96077	0	0.0563433	0.0517713	0.125531	0.0865367	0.101283	0.0706867	0.0379678	0	-0.0472379	-0.0103645	0.205167	0.132516	0.195088	0.0803395	-0.00172225	0.031	0.022	0.017	0.019	0.022	0.069	1.03	1.03	0.99	0.97	1.05	1.07	1.01	1.03	1.02
P32471	Elongation factor 1-beta OS=Saccharomyces cerevisiae (strain ATCC 204508 / S288c) GN=EFB1 PE=1 SV=4	Elongation factor 1-beta	EFB1	0	-0.159956	-0.172854	0.106373	0.0671573	-0.18911	-0.312522	-3.07654	0	0.0483437	0.20988	0.22865	0.168646	0.227484	0.17885	0.045511	0	-0.151448	-0.20892	0.371377	0.0363353	0.0347967	-0.0946346	0.0880657	0.068	0.077	0.076	0.06	0.064	0.064	0.93	1.06	0.92	0.84	1.11	1.01	0.97	0.99	1.02
P11633	Non-histone chromosomal protein 6B OS=Saccharomyces cerevisiae (strain ATCC 204508 / S288c) GN=NHP6B PE=1 SV=3	Non-histone chromosomal protein 6B	NHP6B	0	0.180233	0.127382	0.200934	0.222992	0.02756	0.161109	-0.00227679	0	0.184599	0.17716	0.187945	0.102615	0.242535	0.429045	0.154612	0	0.38208	0.338609	0.0186018	0.43843	0.317962	0.15872	0.0139738	0.063	0.071	0.139	0.065	0.099	0.106	1.08	1.09	1.19	1.07	1.21	1.12	1.12	1.14	1.02
P0CX49	60S ribosomal protein L18-A OS=Saccharomyces cerevisiae (strain ATCC 204508 / S288c) GN=RPL18A PE=1 SV=1	60S ribosomal protein L18-A	RPL18A	0	-0.181374	-0.0604753	-0.115417	0.134829	-0.141056	-0.217285	-2.38452	0	-0.131743	0.172392	0.0802187	0.101798	0.203554	0.0595371	-0.0911868	0	-0.0138975	0.0237059	0.339014	0.188308	0.108229	0.155048	0.0630557	0.063	0.106	0.013	0.037	0.102	0.032	0.95	1.01	1	0.88	1.04	1.08	0.99	1	1.01
P26785	60S ribosomal protein L16-B OS=Saccharomyces cerevisiae (strain ATCC 204508 / S288c) GN=RPL16B PE=1 SV=3	60S ribosomal protein L16-B	RPL16B	0	-0.149927	-0.177722	0.200758	0.0739466	-0.214801	-0.161946	-2.36093	0	-0.0330868	0.253534	0.203579	0.0573779	0.247746	-0.0190629	0.33768	0	-0.0478596	-0.148623	0.116967	-0.0680375	-0.0680375	-0.0944022	-0.0279601	0.067	0.112	0.052	0.026	0.125	0.023	0.93	1.06	0.96	0.88	1.15	0.96	0.98	0.99	1.01
P0CX34	40S ribosomal protein S30-B OS=Saccharomyces cerevisiae (strain ATCC 204508 / S288c) GN=RPS30B PE=1 SV=1	40S ribosomal protein S30-B	RPS30B	0	-0.0956805	0.0424063	0.288824	0.326425	-0.0467887	-0.0232047	-1.6573	0	0.017461	0.198288	0.0475182	-0.0436944	0.320786	0.00919335	-0.0591682	0	0.0699155	-0.133876	0.290953	0.0651682	-0.0296541	-0.0646053	0.167491	0.049	0.078	0.071	0.012	0.145	0.089	0.99	1.05	0.99	0.98	1.07	1.02	1.01	1.02	1.01
P14126	60S ribosomal protein L3 OS=Saccharomyces cerevisiae (strain ATCC 204508 / S288c) GN=RPL3 PE=1 SV=4	60S ribosomal protein L3	RPL3	0	-0.243403	-0.0392997	-0.0662313	0.107996	-0.15821	-0.263024	-2.80314	0	-0.194952	0.124409	-0.0158895	0.113939	0.0766069	-0.00762867	-0.0819655	0	0	-0.0265335	0.423917	0.182985	0.135244	0.164078	0.089172	0.088	0.11	0.011	0.051	0.055	0.026	0.94	0.99	0.99	0.86	1	1.09	0.97	0.99	1.01
P38912	Eukaryotic translation initiation factor 1A OS=Saccharomyces cerevisiae (strain ATCC 204508 / S288c) GN=TIF11 PE=1 SV=1	Eukaryotic translation initiation factor 1A	TIF11	0	0.0767258	0.266023	0.110807	0.265829	0.115549	0.178912	-1.55086	0	-0.262296	0.103829	-0.507154	0.0294251	0.00970839	-0.0829562	-0.225307	0	-0.144718	0.0313229	-0.0379167	0.0888451	0.0390485	0.0971668	-0.0753395	0.096	0.127	0.064	0.031	0.081	0.06	1.09	0.97	0.98	1.11	0.94	1.02	1.01	1.02	1.01
Q3E795	Uncharacterized protein YLR361C-A OS=Saccharomyces cerevisiae (strain ATCC 204508 / S288c) GN=YLR361C-A PE=1 SV=1	Uncharacterized protein YLR361C-A	YLR361C-A	0	-0.00391505	-0.11526	-0.357552	0.177579	-0.252905	-0.3164	0.0181311	0	0.00723157	-0.239164	0.0115532	0.0926562	-0.116202	0.0926562	0.231272	0	0.371542	0.252431	0.26323	0.483245	0.371542	0.376976	0.120435	0.045	0.094	0.128	0.031	0.12	0.098	0.97	0.95	1.16	0.82	1.05	1.23	1.03	1.03	1.01
P25293	Nucleosome assembly protein OS=Saccharomyces cerevisiae (strain ATCC 204508 / S288c) GN=NAP1 PE=1 SV=2	Nucleosome assembly protein	NAP1	0	-0.0393955	-0.109585	0.196973	0.178073	-0.130376	-0.0268542	-2.29703	0	0.00424669	0.165876	0.0400774	0.183252	0.273784	0.175741	-0.134105	0	-0.00641301	-0.139287	0.425228	0.174159	0.0394481	-0.00457781	-0.25315	0.038	0.067	0.054	0.051	0.142	0.106	0.97	1.04	0.97	0.95	1.08	0.95	0.99	1	1
P40459	Pantoate--beta-alanine ligase OS=Saccharomyces cerevisiae (strain ATCC 204508 / S288c) GN=PAN6 PE=1 SV=2	Pantoate--beta-alanine ligase	PAN6	0	-0.343954	-0.0109711	0.0216951	0.259387	-0.289507	-0.0901978	-0.489805	0	-0.0529602	-0.0317895	-0.00970698	0.0925046	0.256368	-0.0417135	0.137174	0	0.0786179	-0.0933221	0.151259	0.0305065	-0.18341	-0.049753	-0.0409762	0.13	0.019	0.059	0.098	0.103	0.054	0.93	0.98	1	0.88	1.09	0.94	0.97	0.97	1
Q02326	60S ribosomal protein L6-A OS=Saccharomyces cerevisiae (strain ATCC 204508 / S288c) GN=RPL6A PE=1 SV=2	60S ribosomal protein L6-A	RPL6A	0	-0.18102	0.0011188	-0.110449	0.0538259	-0.200608	-0.158776	-1.7161	0	-0.164065	0.0845139	-0.0377929	0.0552279	0.14948	0.0280476	-0.00935581	0	-0.272256	0.0317796	0.132429	0.0971203	-0.022959	0.0265979	-0.126604	0.071	0.086	0.112	0.021	0.058	0.054	0.96	0.98	0.95	0.88	1.04	0.97	0.97	0.97	1
P0CX32	40S ribosomal protein S24-B OS=Saccharomyces cerevisiae (strain ATCC 204508 / S288c) GN=RPS24B PE=1 SV=1	40S ribosomal protein S24-B	RPS24B	0	-0.189571	-0.111533	-0.0465747	0.0504234	-0.20326	-0.286094	-2.47925	0	0.0336963	0.195371	0.111358	0.0937684	0.284459	0.0382418	-0.00861019	0	0.119261	0.0384672	0.45235	0.149261	0.166262	0.135898	0.120716	0.066	0.074	0.042	0.041	0.112	0.016	0.93	1.06	1.04	0.84	1.08	1.1	1.01	1.01	1
P02400	60S acidic ribosomal protein P2-beta OS=Saccharomyces cerevisiae (strain ATCC 204508 / S288c) GN=RPP2B PE=1 SV=2	60S acidic ribosomal protein P2-beta	RPP2B	0	0.0433439	-0.0585776	0.168097	0.208052	-0.0583143	-0.154956	-2.34615	0	0.0741528	-0.201924	-0.120559	0.0817549	-0.119056	-0.0475363	0.106381	0	0.0984706	0.0108597	0.179946	0.235694	0.129392	0.164874	-0.107598	0.035	0.097	0.038	0.047	0.081	0.1	1	0.97	1.03	0.93	0.99	1.05	1	0.99	0.99
Q00764	Alpha,alpha-trehalose-phosphate synthase [UDP-forming] 56 kDa subunit OS=Saccharomyces cerevisiae (strain ATCC 204508 / S288c) GN=TPS1 PE=1 SV=2	Alpha,alpha-trehalose-phosphate synthase [UDP-forming] 56 kDa subunit	TPS1	0	-0.0351359	-0.0262713	0.194542	0.0553314	-0.119037	-0.265206	-1.53381	0	0.179271	0.172747	0.370695	0.184793	0.37212	0.266715	0.0349497	0	-0.0330187	-0.0176234	0.27828	0.193093	0.0508457	-0.0168176	-0.1931	0.013	0.069	0.011	0.072	0.117	0.086	0.99	1.09	0.99	0.88	1.17	0.97	1.02	1.01	0.99
P0C2H8	60S ribosomal protein L31-A OS=Saccharomyces cerevisiae (strain ATCC 204508 / S288c) GN=RPL31A PE=1 SV=1	60S ribosomal protein L31-A	RPL31A	0	0.181535	0.0918028	0.219404	0.326703	0.0507969	-0.0375371	-1.96615	0	0.136879	-0.00975767	0.12565	0.119871	0.148796	0.253757	0.0436659	0	0.290686	0.155932	0.199499	0.299281	0.210407	-0.00406164	-0.0585642	0.063	0.058	0.1	0.043	0.073	0.101	1.07	1.03	1.11	1.01	1.11	1.04	1.07	1.05	0.98
P31412	V-type proton ATPase subunit C OS=Saccharomyces cerevisiae (strain ATCC 204508 / S288c) GN=VMA5 PE=1 SV=4	V-type proton ATPase subunit C	VMA5	0	-0.214389	0.0573822	-0.203476	0.14367	-0.0676538	-0.272507	-1.27822	0	-0.119727	0.268076	-0.273001	0.127213	0.224435	0.0885517	-0.190482	0	-0.357679	0.0110019	-0.0605415	-0.0347087	0.0608918	0.0819131	-0.383228	0.097	0.141	0.139	0.1	0.143	0.172	0.97	1.04	0.93	0.89	1.04	0.96	0.98	0.96	0.98
P02406	60S ribosomal protein L28 OS=Saccharomyces cerevisiae (strain ATCC 204508 / S288c) GN=RPL28 PE=1 SV=3	60S ribosomal protein L28	RPL28	0	-0.0143007	0.0331447	-0.450492	0.268191	-0.0391223	-0.161979	-2.86057	0	-0.0727219	-0.336558	-0.189281	0.0647296	-0.178977	-0.104155	-0.0399063	0	0.13664	-0.015625	0.0767069	0.208636	0.181296	0.135854	-0.234059	0.017	0.119	0.059	0.06	0.048	0.15	1	0.91	1.03	0.93	0.93	1.03	0.98	0.96	0.98
P25694	Cell division control protein 48 OS=Saccharomyces cerevisiae (strain ATCC 204508 / S288c) GN=CDC48 PE=1 SV=3	Cell division control protein 48	CDC48	0	-0.202265	-0.0184734	-0.0148268	0.144742	-0.13494	-0.121307	-2.08302	0	-0.135524	0.105712	-0.00553002	0.0760347	0.0456887	-0.0563269	-0.460694	0	0.0159523	0.0175822	0.309598	0.19987	0.164861	0.132746	-0.254977	0.076	0.083	0.007	0.007	0.176	0.154	0.95	1	1.01	0.92	0.91	1.02	0.99	0.95	0.96
P10622	60S acidic ribosomal protein P1-beta OS=Saccharomyces cerevisiae (strain ATCC 204508 / S288c) GN=RPP1B PE=1 SV=3	60S acidic ribosomal protein P1-beta	RPP1B	0	-0.21864	-0.41316	-0.273782	-0.292641	-0.486272	-0.407543	-2.02846	0	0.179416	0.452924	0.694935	0.375212	0.387548	0.242655	-0.158366	0	-0.146389	0.0219784	0.412663	0.0512805	-0.0417271	-0.0846972	0.210137	0.143	0.16	0.062	0.039	0.187	0.113	0.87	1.17	0.97	0.73	1.13	1.02	1	0.96	0.96
P40525	60S ribosomal protein L34-B OS=Saccharomyces cerevisiae (strain ATCC 204508 / S288c) GN=RPL34B PE=1 SV=1	60S ribosomal protein L34-B	RPL34B	0	0.202748	-0.236523	-0.0117008	-0.0658052	-0.317855	-0.318436	-1.89528	0	0.417643	-0.0783146	-0.00643343	-0.0360185	0.149514	0.132291	-0.199002	0	0.304652	-0.0869111	0.159262	0.0217587	-0.0647671	-0.140613	-0.322842	0.151	0.193	0.147	0	0.13	0.09	1	1.09	1.06	0.8	1.03	0.89	1.05	0.91	0.86
P09734	Tubulin alpha-3 chain OS=Saccharomyces cerevisiae (strain ATCC 204508 / S288c) GN=TUB3 PE=1 SV=1	Tubulin alpha-3 chain	TUB3	0	-0.221276	-0.213481	-0.418617	-0.797667	-0.985326	-1.08704	-1.96555	0	-0.0917987	-0.146597	-0.292931	-0.704829	-0.377059	-0.579414	-0.623529	0	-0.171622	-0.196528	-0.265124	-0.478346	-0.525651	-0.746041	-1.10836	0.089	0.052	0.076	0.05	0.093	0.198	0.91	0.95	0.92	0.49	0.7	0.58	0.92	0.59	0.64

## Sheet: Supplementary Table S3
Accession	Description	Protein Description	GeneSym	Mu_0min	Mu_10min	Mu_30min	Mu_60min	Mu_120min	ANOVA_Fstats	ANOVA_Pval	GES	FDR
Q01217	Protein ARG5,6, mitochondrial OS=Saccharomyces cerevisiae (strain ATCC 204508 / S288c) GN=ARG5,6 PE=1 SV=1	Protein ARG5,6, mitochondrial	ARG5,6	3.46905	3.40738	4.19183	2.92692	3.21315	17.186	0.004	0.932	0.815633
P02994	Elongation factor 1-alpha OS=Saccharomyces cerevisiae (strain ATCC 204508 / S288c) GN=TEF1 PE=1 SV=1	Elongation factor 1-alpha	TEF1	11.3512	11.303	11.2264	10.9575	11.1986	12.455	0.008	0.909	0.815633
Q12207	Non-classical export protein 2 OS=Saccharomyces cerevisiae (strain ATCC 204508 / S288c) GN=NCE102 PE=1 SV=1	Non-classical export protein 2	NCE102	6.90779	6.2915	8.34062	6.52169	6.59375	11.334	0.01	0.901	0.815633
P36088	Free methionine-R-sulfoxide reductase OS=Saccharomyces cerevisiae (strain ATCC 204508 / S288c) GN=YKL069W PE=1 SV=1	Free methionine-R-sulfoxide reductase	YKL069W	4.45765	4.34578	4.86333	4.50326	4.76927	9.531	0.015	0.884	0.815633
P01120	Ras-like protein 2 OS=Saccharomyces cerevisiae (strain ATCC 204508 / S288c) GN=RAS2 PE=1 SV=4	Ras-like protein 2	RAS2	5.72733	5.56794	5.32343	5.57546	5.63435	9.181	0.016	0.88	0.815633
P41818	Protein GLC8 OS=Saccharomyces cerevisiae (strain ATCC 204508 / S288c) GN=GLC8 PE=1 SV=1	Protein GLC8	GLC8	5.89575	5.71403	5.9358	5.71186	5.7321	8.557	0.018	0.873	0.815633
P07274	Profilin OS=Saccharomyces cerevisiae (strain ATCC 204508 / S288c) GN=PFY1 PE=1 SV=2	Profilin	PFY1	6.07774	5.94604	6.30847	5.82174	5.98796	8.568	0.018	0.873	0.815633
P10664	60S ribosomal protein L4-A OS=Saccharomyces cerevisiae (strain ATCC 204508 / S288c) GN=RPL4A PE=1 SV=4	60S ribosomal protein L4-A	RPL4A	9.00072	8.59124	8.7081	9.24102	8.72016	8.515	0.019	0.872	0.815633
P32356	Neutral trehalase OS=Saccharomyces cerevisiae (strain ATCC 204508 / S288c) GN=NTH1 PE=1 SV=3	Neutral trehalase	NTH1	5.02355	4.97947	5.04093	5.42182	4.89795	7.297	0.026	0.854	0.815633
Q05016	NADP-dependent 3-hydroxy acid dehydrogenase OS=Saccharomyces cerevisiae (strain ATCC 204508 / S288c) GN=YMR226C PE=1 SV=1	NADP-dependent 3-hydroxy acid dehydrogenase	YMR226C	7.06337	6.72289	6.6181	7.00835	6.66741	7.176	0.027	0.852	0.815633
Q12451	Oxysterol-binding protein homolog 2 OS=Saccharomyces cerevisiae (strain ATCC 204508 / S288c) GN=OSH2 PE=1 SV=1	Oxysterol-binding protein homolog 2	OSH2	4.35398	4.38594	5.28196	4.41743	5.94509	7.066	0.027	0.85	0.815633
Q00711	Succinate dehydrogenase [ubiquinone] flavoprotein subunit, mitochondrial OS=Saccharomyces cerevisiae (strain ATCC 204508 / S288c) GN=SDH1 PE=1 SV=1	Succinate dehydrogenase [ubiquinone] flavoprotein subunit, mitochondrial	SDH1	7.28572	7.04952	6.87571	7.27686	7.04163	6.976	0.028	0.848	0.815633
P38732	Protein-lysine N-methyltransferase EFM1 OS=Saccharomyces cerevisiae (strain ATCC 204508 / S288c) GN=EFM1 PE=1 SV=1	Protein-lysine N-methyltransferase EFM1	EFM1	4.13282	4.48877	4.46529	4.47618	4.62355	6.187	0.036	0.832	0.815633
P38715	NADPH-dependent aldose reductase GRE3 OS=Saccharomyces cerevisiae (strain ATCC 204508 / S288c) GN=GRE3 PE=1 SV=1	NADPH-dependent aldose reductase GRE3	GRE3	8.8477	8.74567	8.49078	8.60097	8.75224	6.045	0.037	0.829	0.815633
P08067	Cytochrome b-c1 complex subunit Rieske, mitochondrial OS=Saccharomyces cerevisiae (strain ATCC 204508 / S288c) GN=RIP1 PE=1 SV=1	Cytochrome b-c1 complex subunit Rieske, mitochondrial	RIP1	6.88674	7.14563	6.86341	6.7589	7.67662	5.832	0.04	0.823	0.815633
P16861	ATP-dependent 6-phosphofructokinase subunit alpha OS=Saccharomyces cerevisiae (strain ATCC 204508 / S288c) GN=PFK1 PE=1 SV=1	ATP-dependent 6-phosphofructokinase subunit alpha	PFK1	8.21691	7.88609	8.36077	7.9106	7.98337	5.703	0.042	0.82	0.815633
P40347	Low molecular weight phosphotyrosine protein phosphatase OS=Saccharomyces cerevisiae (strain ATCC 204508 / S288c) GN=LTP1 PE=1 SV=1	Low molecular weight phosphotyrosine protein phosphatase	LTP1	6.4216	6.50325	6.35144	6.29457	6.42884	5.422	0.046	0.813	0.815633
P36008	Elongation factor 1-gamma 2 OS=Saccharomyces cerevisiae (strain ATCC 204508 / S288c) GN=TEF4 PE=1 SV=1	Elongation factor 1-gamma 2	TEF4	8.81665	8.44284	8.52056	8.79922	8.42285	5.22	0.049	0.807	0.815633
P36136	Sedoheptulose 1,7-bisphosphatase OS=Saccharomyces cerevisiae (strain ATCC 204508 / S288c) GN=SHB17 PE=1 SV=1	Sedoheptulose 1,7-bisphosphatase	SHB17	6.26837	6.21225	6.463	6.02273	6.08753	5.09	0.052	0.803	0.815633
P0CX49	60S ribosomal protein L18-A OS=Saccharomyces cerevisiae (strain ATCC 204508 / S288c) GN=RPL18A PE=1 SV=1	60S ribosomal protein L18-A	RPL18A	10.0724	9.93305	10.0919	9.73463	9.86905	4.895	0.056	0.797	0.815633
Q03104	Meiotic sister chromatid recombination protein 1 OS=Saccharomyces cerevisiae (strain ATCC 204508 / S288c) GN=MSC1 PE=1 SV=1	Meiotic sister chromatid recombination protein 1	MSC1	7.77642	7.74934	7.42129	7.7414	7.76521	4.749	0.059	0.792	0.815633
P80235	Putative mitochondrial carnitine O-acetyltransferase OS=Saccharomyces cerevisiae (strain ATCC 204508 / S288c) GN=YAT1 PE=1 SV=2	Putative mitochondrial carnitine O-acetyltransferase	YAT1	6.20574	6.34604	6.09975	6.41491	6.10933	4.744	0.059	0.791	0.815633
P60010	Actin OS=Saccharomyces cerevisiae (strain ATCC 204508 / S288c) GN=ACT1 PE=1 SV=1	Actin	ACT1	9.18148	9.08036	9.0223	9.12378	8.99914	4.729	0.06	0.791	0.815633
P46655	Glutamate--tRNA ligase, cytoplasmic OS=Saccharomyces cerevisiae (strain ATCC 204508 / S288c) GN=GUS1 PE=1 SV=3	Glutamate--tRNA ligase, cytoplasmic	GUS1	9.09694	9.05252	9.22731	8.74421	9.05103	4.545	0.064	0.784	0.815633
P49166	60S ribosomal protein L37-A OS=Saccharomyces cerevisiae (strain ATCC 204508 / S288c) GN=RPL37A PE=1 SV=2	60S ribosomal protein L37-A	RPL37A	6.72931	6.08683	7.11941	5.99842	6.14426	4.527	0.064	0.784	0.815633
P32771	S-(hydroxymethyl)glutathione dehydrogenase OS=Saccharomyces cerevisiae (strain ATCC 204508 / S288c) GN=SFA1 PE=1 SV=1	S-(hydroxymethyl)glutathione dehydrogenase	SFA1	6.63299	6.30746	6.49768	6.94846	6.40589	4.501	0.065	0.783	0.815633
P10659	S-adenosylmethionine synthase 1 OS=Saccharomyces cerevisiae (strain ATCC 204508 / S288c) GN=SAM1 PE=1 SV=2	S-adenosylmethionine synthase 1	SAM1	7.00757	7.0577	6.69136	6.64554	6.87779	4.462	0.066	0.781	0.815633
P38892	Probable S-adenosylmethionine-dependent methyltransferase CRG1 OS=Saccharomyces cerevisiae (strain ATCC 204508 / S288c) GN=CRG1 PE=1 SV=1	Probable S-adenosylmethionine-dependent methyltransferase CRG1	CRG1	5.81264	5.75054	6.22384	5.72235	5.70716	4.331	0.07	0.776	0.815633
P52918	Protein MSN5 OS=Saccharomyces cerevisiae (strain ATCC 204508 / S288c) GN=MSN5 PE=1 SV=1	Protein MSN5	MSN5	5.1286	5.27207	5.41724	5.70917	5.3102	4.283	0.071	0.774	0.815633
P06208	2-isopropylmalate synthase OS=Saccharomyces cerevisiae (strain ATCC 204508 / S288c) GN=LEU4 PE=1 SV=1	2-isopropylmalate synthase	LEU4	8.35914	8.29177	8.12254	8.18632	8.34029	4.143	0.076	0.768	0.815633
P0C2H6	60S ribosomal protein L27-A OS=Saccharomyces cerevisiae (strain ATCC 204508 / S288c) GN=RPL27A PE=1 SV=1	60S ribosomal protein L27-A	RPL27A	5.45465	5.18648	5.85844	6.18651	5.11611	4.04	0.079	0.764	0.815633
P06115	Catalase T OS=Saccharomyces cerevisiae (strain ATCC 204508 / S288c) GN=CTT1 PE=1 SV=3	Catalase T	CTT1	6.57349	6.5505	7.36967	6.65878	6.58947	4.02	0.08	0.763	0.815633
P14127	40S ribosomal protein S17-B OS=Saccharomyces cerevisiae (strain ATCC 204508 / S288c) GN=RPS17B PE=1 SV=1	40S ribosomal protein S17-B	RPS17B	7.99514	7.65214	7.76206	8.0953	7.75157	3.973	0.081	0.761	0.815633
P40525	60S ribosomal protein L34-B OS=Saccharomyces cerevisiae (strain ATCC 204508 / S288c) GN=RPL34B PE=1 SV=1	60S ribosomal protein L34-B	RPL34B	4.84884	4.43811	7.9478	4.43294	4.66874	3.834	0.086	0.754	0.815633
Q03558	NADPH dehydrogenase 2 OS=Saccharomyces cerevisiae (strain ATCC 204508 / S288c) GN=OYE2 PE=1 SV=3	NADPH dehydrogenase 2	OYE2	7.19584	7.23615	7.40232	7.73332	7.07046	3.823	0.087	0.754	0.815633
P33442	40S ribosomal protein S1-A OS=Saccharomyces cerevisiae (strain ATCC 204508 / S288c) GN=RPS1A PE=1 SV=2	40S ribosomal protein S1-A	RPS1A	10.6569	10.4684	10.4363	10.3477	10.467	3.744	0.09	0.75	0.815633
P39990	13 kDa ribonucleoprotein-associated protein OS=Saccharomyces cerevisiae (strain ATCC 204508 / S288c) GN=SNU13 PE=1 SV=1	13 kDa ribonucleoprotein-associated protein	SNU13	6.52091	6.16474	6.41463	6.92061	6.3529	3.609	0.096	0.743	0.815633
P26637	Leucine--tRNA ligase, cytoplasmic OS=Saccharomyces cerevisiae (strain ATCC 204508 / S288c) GN=CDC60 PE=1 SV=1	Leucine--tRNA ligase, cytoplasmic	CDC60	7.28914	7.24156	7.35538	7.35041	7.19882	3.528	0.1	0.738	0.815633
P13517	F-actin-capping protein subunit beta OS=Saccharomyces cerevisiae (strain ATCC 204508 / S288c) GN=CAP2 PE=1 SV=3	F-actin-capping protein subunit beta	CAP2	5.9988	5.95013	6.12878	6.49791	6.11687	3.422	0.105	0.732	0.815633
P0CT05	Protease B inhibitor 1 OS=Saccharomyces cerevisiae GN=PBI2 PE=1 SV=1	Protease B inhibitor 1	PBI2	8.98947	8.92264	9.08135	8.4346	8.7956	3.259	0.114	0.723	0.815633
P39078	T-complex protein 1 subunit delta OS=Saccharomyces cerevisiae (strain ATCC 204508 / S288c) GN=CCT4 PE=1 SV=2	T-complex protein 1 subunit delta	CCT4	6.45934	6.31432	6.18452	6.10546	6.36933	3.239	0.115	0.722	0.815633
P20435	DNA-directed RNA polymerases I, II, and III subunit RPABC2 OS=Saccharomyces cerevisiae (strain ATCC 204508 / S288c) GN=RPO26 PE=1 SV=1	DNA-directed RNA polymerases I, II, and III subunit RPABC2	RPO26	6.67634	6.53135	6.43747	6.80027	6.43626	3.209	0.116	0.72	0.815633
P51402	60S ribosomal protein L37-B OS=Saccharomyces cerevisiae (strain ATCC 204508 / S288c) GN=RPL37B PE=1 SV=2	60S ribosomal protein L37-B	RPL37B	5.1294	4.94975	5.55326	4.55494	4.51081	3.21	0.116	0.72	0.815633
P53184	Nicotinamidase OS=Saccharomyces cerevisiae (strain ATCC 204508 / S288c) GN=PNC1 PE=1 SV=1	Nicotinamidase	PNC1	8.85741	8.75426	8.20495	8.40451	8.53989	3.2	0.117	0.719	0.815633
P07275	Delta-1-pyrroline-5-carboxylate dehydrogenase, mitochondrial OS=Saccharomyces cerevisiae (strain ATCC 204508 / S288c) GN=PUT2 PE=1 SV=2	Delta-1-pyrroline-5-carboxylate dehydrogenase, mitochondrial	PUT2	4.99209	5.39231	4.78412	4.63005	5.30903	3.161	0.119	0.717	0.815633
A6ZUC0	Protein SDS23 OS=Saccharomyces cerevisiae (strain YJM789) GN=SDS23 PE=3 SV=1	Protein SDS23	SDS23	6.41001	6.41977	6.20623	6.26466	6.39657	3.145	0.12	0.716	0.815633
P05739	60S ribosomal protein L6-B OS=Saccharomyces cerevisiae (strain ATCC 204508 / S288c) GN=RPL6B PE=1 SV=4	60S ribosomal protein L6-B	RPL6B	8.30941	8.42828	8.50978	8.79408	8.20403	3.095	0.123	0.712	0.815633
P01123	GTP-binding protein YPT1 OS=Saccharomyces cerevisiae (strain ATCC 204508 / S288c) GN=YPT1 PE=1 SV=2	GTP-binding protein YPT1	YPT1	6.30313	6.11802	6.34008	6.89389	6.28672	3.109	0.123	0.713	0.815633
P10591	Heat shock protein SSA1 OS=Saccharomyces cerevisiae (strain ATCC 204508 / S288c) GN=SSA1 PE=1 SV=4	Heat shock protein SSA1	SSA1	11.7637	11.7317	11.6021	11.5763	11.6882	3.063	0.126	0.71	0.815633
A6ZRK4	Cysteine proteinase 1, mitochondrial OS=Saccharomyces cerevisiae (strain YJM789) GN=LAP3 PE=3 SV=2	Cysteine proteinase 1, mitochondrial	LAP3	5.40338	5.64258	5.39832	5.25925	5.24923	2.922	0.135	0.7	0.815633
P39015	Suppressor protein STM1 OS=Saccharomyces cerevisiae (strain ATCC 204508 / S288c) GN=STM1 PE=1 SV=3	Suppressor protein STM1	STM1	9.18248	9.17518	9.26971	8.80006	9.10336	2.855	0.14	0.695	0.815633
P22133	Malate dehydrogenase, cytoplasmic OS=Saccharomyces cerevisiae (strain ATCC 204508 / S288c) GN=MDH2 PE=1 SV=2	Malate dehydrogenase, cytoplasmic	MDH2	8.02062	8.14493	8.24734	7.99685	8.03587	2.859	0.14	0.696	0.815633
P13298	Orotate phosphoribosyltransferase 1 OS=Saccharomyces cerevisiae (strain ATCC 204508 / S288c) GN=URA5 PE=1 SV=2	Orotate phosphoribosyltransferase 1	URA5	5.35492	5.18786	5.01421	5.61836	5.15271	2.844	0.141	0.695	0.815633
P16547	Mitochondrial outer membrane protein OM45 OS=Saccharomyces cerevisiae (strain ATCC 204508 / S288c) GN=OM45 PE=1 SV=2	Mitochondrial outer membrane protein OM45	OM45	7.05736	7.17985	7.14115	6.95598	7.35264	2.801	0.144	0.691	0.815633
P39077	T-complex protein 1 subunit gamma OS=Saccharomyces cerevisiae (strain ATCC 204508 / S288c) GN=CCT3 PE=1 SV=2	T-complex protein 1 subunit gamma	CCT3	8.08891	8.13853	8.02983	7.85322	8.1474	2.778	0.146	0.69	0.815633
P32379	Proteasome subunit alpha type-5 OS=Saccharomyces cerevisiae (strain ATCC 204508 / S288c) GN=PUP2 PE=1 SV=2	Proteasome subunit alpha type-5	PUP2	4.26988	4.39247	4.9094	4.1495	4.53634	2.786	0.146	0.69	0.815633
P09938	Ribonucleoside-diphosphate reductase small chain 1 OS=Saccharomyces cerevisiae (strain ATCC 204508 / S288c) GN=RNR2 PE=1 SV=2	Ribonucleoside-diphosphate reductase small chain 1	RNR2	9.99453	9.99793	10.0072	9.97305	9.72416	2.746	0.149	0.687	0.815633
A6ZYI0	Adenylate kinase OS=Saccharomyces cerevisiae (strain YJM789) GN=ADK1 PE=3 SV=1	Adenylate kinase	ADK1	10.3556	10.348	10.3795	9.90127	10.2584	2.731	0.15	0.686	0.815633
P23776	Glucan 1,3-beta-glucosidase I/II OS=Saccharomyces cerevisiae (strain ATCC 204508 / S288c) GN=EXG1 PE=1 SV=1	Glucan 1,3-beta-glucosidase I/II	EXG1	5.41311	5.80226	5.76516	6.04988	5.60266	2.7	0.153	0.684	0.815633
Q12177	Uncharacterized protein YLL056C OS=Saccharomyces cerevisiae (strain ATCC 204508 / S288c) GN=YLL056C PE=2 SV=1	Uncharacterized protein YLL056C	YLL056C	7.41567	7.19311	6.89897	7.29906	7.29537	2.638	0.158	0.679	0.815633
Q08245	Protein ZEO1 OS=Saccharomyces cerevisiae (strain ATCC 204508 / S288c) GN=ZEO1 PE=1 SV=3	Protein ZEO1	ZEO1	8.32504	8.22682	9.68564	7.83915	8.27541	2.607	0.161	0.676	0.815633
P31412	V-type proton ATPase subunit C OS=Saccharomyces cerevisiae (strain ATCC 204508 / S288c) GN=VMA5 PE=1 SV=4	V-type proton ATPase subunit C	VMA5	7.72541	7.80642	7.42966	7.42158	7.70208	2.6	0.161	0.675	0.815633
P38616	Protein YGP1 OS=Saccharomyces cerevisiae (strain ATCC 204508 / S288c) GN=YGP1 PE=1 SV=2	Protein YGP1	YGP1	6.24117	6.11137	6.60441	6.8588	6.25824	2.604	0.161	0.676	0.815633
P19414	Aconitate hydratase, mitochondrial OS=Saccharomyces cerevisiae (strain ATCC 204508 / S288c) GN=ACO1 PE=1 SV=2	Aconitate hydratase, mitochondrial	ACO1	10.0186	10.0399	9.9728	9.72005	9.88297	2.529	0.168	0.669	0.815633
P14742	Glutamine--fructose-6-phosphate aminotransferase [isomerizing] OS=Saccharomyces cerevisiae (strain ATCC 204508 / S288c) GN=GFA1 PE=1 SV=4	Glutamine--fructose-6-phosphate aminotransferase [isomerizing]	GFA1	9.01244	9.02276	8.6984	8.91403	8.87476	2.533	0.168	0.67	0.815633
P41057	40S ribosomal protein S29-A OS=Saccharomyces cerevisiae (strain ATCC 204508 / S288c) GN=RPS29A PE=1 SV=3	40S ribosomal protein S29-A	RPS29A	4.44544	4.52636	5.96999	5.99651	4.85328	2.533	0.168	0.67	0.815633
P17536	Tropomyosin-1 OS=Saccharomyces cerevisiae (strain ATCC 204508 / S288c) GN=TPM1 PE=1 SV=1	Tropomyosin-1	TPM1	8.179	8.04454	8.33719	7.682	8.06803	2.518	0.169	0.668	0.815633
E7KDM2	Cruciform DNA-recognizing protein 1 OS=Saccharomyces cerevisiae (strain AWRI796) GN=CRP1 PE=3 SV=2	Cruciform DNA-recognizing protein 1	CRP1	6.54186	6.44403	7.09427	6.46323	6.59037	2.525	0.169	0.669	0.815633
P06106	Homocysteine/cysteine synthase OS=Saccharomyces cerevisiae (strain ATCC 204508 / S288c) GN=MET17 PE=1 SV=3	Homocysteine/cysteine synthase	MET17	3.98465	4.20009	3.89446	4.37564	4.27441	2.462	0.175	0.663	0.815633
P38009	Bifunctional purine biosynthesis protein ADE17 OS=Saccharomyces cerevisiae (strain ATCC 204508 / S288c) GN=ADE17 PE=1 SV=2	Bifunctional purine biosynthesis protein ADE17	ADE17	10.0587	9.92382	9.68305	9.81289	9.90595	2.443	0.177	0.662	0.815633
P00729	Carboxypeptidase Y OS=Saccharomyces cerevisiae (strain ATCC 204508 / S288c) GN=PRC1 PE=1 SV=1	Carboxypeptidase Y	PRC1	6.25881	6.23462	6.32265	5.91173	6.19716	2.439	0.177	0.661	0.815633
P07560	Ras-related protein SEC4 OS=Saccharomyces cerevisiae (strain ATCC 204508 / S288c) GN=SEC4 PE=1 SV=1	Ras-related protein SEC4	SEC4	5.56251	5.66587	5.24187	5.44555	5.46786	2.425	0.179	0.66	0.815633
P00958	Methionine--tRNA ligase, cytoplasmic OS=Saccharomyces cerevisiae (strain ATCC 204508 / S288c) GN=MES1 PE=1 SV=4	Methionine--tRNA ligase, cytoplasmic	MES1	7.63716	7.38525	7.45584	7.64812	7.40963	2.402	0.181	0.658	0.815633
P29509	Thioredoxin reductase 1 OS=Saccharomyces cerevisiae (strain ATCC 204508 / S288c) GN=TRR1 PE=1 SV=3	Thioredoxin reductase 1	TRR1	6.55117	6.10965	5.89813	6.37606	6.1679	2.392	0.182	0.657	0.815633
Q12335	Protoplast secreted protein 2 OS=Saccharomyces cerevisiae (strain ATCC 204508 / S288c) GN=PST2 PE=1 SV=1	Protoplast secreted protein 2	PST2	7.5027	7.29644	7.43275	7.57491	7.3255	2.365	0.185	0.654	0.815633
P54113	Bifunctional purine biosynthesis protein ADE16 OS=Saccharomyces cerevisiae (strain ATCC 204508 / S288c) GN=ADE16 PE=1 SV=1	Bifunctional purine biosynthesis protein ADE16	ADE16	7.0788	7.00768	6.79818	6.83111	7.03164	2.357	0.186	0.653	0.815633
Q12230	Sphingolipid long chain base-responsive protein LSP1 OS=Saccharomyces cerevisiae (strain ATCC 204508 / S288c) GN=LSP1 PE=1 SV=1	Sphingolipid long chain base-responsive protein LSP1	LSP1	8.89718	9.02684	8.73458	8.6427	8.814	2.354	0.187	0.653	0.815633
P15992	Heat shock protein 26 OS=Saccharomyces cerevisiae (strain ATCC 204508 / S288c) GN=HSP26 PE=1 SV=3	Heat shock protein 26	HSP26	11.8204	11.9518	11.7158	11.644	11.7388	2.34	0.188	0.652	0.815633
P0CX48	40S ribosomal protein S11-B OS=Saccharomyces cerevisiae (strain ATCC 204508 / S288c) GN=RPS11B PE=1 SV=1	40S ribosomal protein S11-B	RPS11B	9.67883	9.34102	9.61758	9.88077	9.41942	2.333	0.189	0.651	0.815633
P06168	Ketol-acid reductoisomerase, mitochondrial OS=Saccharomyces cerevisiae (strain ATCC 204508 / S288c) GN=ILV5 PE=1 SV=1	Ketol-acid reductoisomerase, mitochondrial	ILV5	9.45641	9.4222	9.19669	9.20562	9.21602	2.279	0.195	0.646	0.815633
P15731	Ubiquitin-conjugating enzyme E2 4 OS=Saccharomyces cerevisiae (strain ATCC 204508 / S288c) GN=UBC4 PE=1 SV=1	Ubiquitin-conjugating enzyme E2 4	UBC4	3.60446	3.02821	5.96325	4.3832	3.37927	2.256	0.198	0.643	0.815633
P32836	GTP-binding nuclear protein GSP2/CNR2 OS=Saccharomyces cerevisiae (strain ATCC 204508 / S288c) GN=GSP2 PE=1 SV=1	GTP-binding nuclear protein GSP2/CNR2	GSP2	8.12612	7.88608	8.25061	8.66246	7.91084	2.238	0.2	0.642	0.815633
P21264	Phosphoribosylaminoimidazole carboxylase OS=Saccharomyces cerevisiae (strain ATCC 204508 / S288c) GN=ADE2 PE=1 SV=1	Phosphoribosylaminoimidazole carboxylase	ADE2	6.98493	7.15254	6.84457	6.70653	7.2947	2.235	0.201	0.641	0.815633
P26786	40S ribosomal protein S7-A OS=Saccharomyces cerevisiae (strain ATCC 204508 / S288c) GN=RPS7A PE=1 SV=4	40S ribosomal protein S7-A	RPS7A	5.53592	5.26182	5.51783	5.69926	5.36133	2.22	0.202	0.64	0.815633
P09232	Cerevisin OS=Saccharomyces cerevisiae (strain ATCC 204508 / S288c) GN=PRB1 PE=1 SV=1	Cerevisin	PRB1	6.44964	6.71622	6.71379	6.47153	6.21361	2.227	0.202	0.64	0.815633
P16521	Elongation factor 3A OS=Saccharomyces cerevisiae (strain ATCC 204508 / S288c) GN=YEF3 PE=1 SV=4	Elongation factor 3A	YEF3	10.5923	10.6258	10.1263	10.1377	10.4455	2.218	0.203	0.64	0.815633
P38788	Ribosome-associated complex subunit SSZ1 OS=Saccharomyces cerevisiae (strain ATCC 204508 / S288c) GN=SSZ1 PE=1 SV=2	Ribosome-associated complex subunit SSZ1	SSZ1	9.35529	9.35664	8.91993	8.96363	9.28251	2.208	0.204	0.638	0.815633
Q03862	Probable metalloprotease ARX1 OS=Saccharomyces cerevisiae (strain ATCC 204508 / S288c) GN=ARX1 PE=1 SV=1	Probable metalloprotease ARX1	ARX1	4.52809	4.9273	4.84694	4.77893	4.82584	2.201	0.205	0.638	0.815633
P15873	Proliferating cell nuclear antigen OS=Saccharomyces cerevisiae (strain ATCC 204508 / S288c) GN=POL30 PE=1 SV=1	Proliferating cell nuclear antigen	POL30	7.07872	7.14486	6.89274	6.88947	7.17843	2.173	0.208	0.635	0.815633
Q12480	Probable electron transfer flavoprotein subunit alpha, mitochondrial OS=Saccharomyces cerevisiae (strain ATCC 204508 / S288c) GN=AIM45 PE=1 SV=1	Probable electron transfer flavoprotein subunit alpha, mitochondrial	AIM45	5.34436	5.2376	4.99337	5.1429	5.08464	2.154	0.211	0.633	0.815633
P31539	Heat shock protein 104 OS=Saccharomyces cerevisiae (strain ATCC 204508 / S288c) GN=HSP104 PE=1 SV=2	Heat shock protein 104	HSP104	11.1299	11.1466	10.9996	10.8873	11.0499	2.14	0.213	0.631	0.815633
P0CH08	Ubiquitin-60S ribosomal protein L40 OS=Saccharomyces cerevisiae (strain ATCC 204508 / S288c) GN=RPL40A PE=1 SV=1	Ubiquitin-60S ribosomal protein L40	RPL40A	9.17187	9.28796	9.09535	9.14857	9.13928	2.142	0.213	0.632	0.815633
Q08742	Thiosulfate sulfurtransferase RDL2, mitochondrial OS=Saccharomyces cerevisiae (strain ATCC 204508 / S288c) GN=RDL2 PE=1 SV=1	Thiosulfate sulfurtransferase RDL2, mitochondrial	RDL2	5.37407	5.06226	4.98797	5.13289	5.37796	2.108	0.217	0.628	0.815633
P15202	Peroxisomal catalase A OS=Saccharomyces cerevisiae (strain ATCC 204508 / S288c) GN=CTA1 PE=1 SV=1	Peroxisomal catalase A	CTA1	3.84765	3.48303	4.76522	3.906	3.70886	2.105	0.218	0.627	0.815633
P32527	Zuotin OS=Saccharomyces cerevisiae (strain ATCC 204508 / S288c) GN=ZUO1 PE=1 SV=1	Zuotin	ZUO1	8.31467	8.36113	8.09848	7.89918	8.31	2.087	0.22	0.625	0.815633
P13188	Glutamine--tRNA ligase OS=Saccharomyces cerevisiae (strain ATCC 204508 / S288c) GN=GLN4 PE=1 SV=2	Glutamine--tRNA ligase	GLN4	5.57179	5.79698	6.09407	5.71877	5.62644	2.088	0.22	0.626	0.815633
P26783	40S ribosomal protein S5 OS=Saccharomyces cerevisiae (strain ATCC 204508 / S288c) GN=RPS5 PE=1 SV=3	40S ribosomal protein S5	RPS5	9.33686	9.32022	8.9727	8.93497	9.23294	2.08	0.221	0.625	0.815633
Q04067	Eukaryotic translation initiation factor 3 subunit G OS=Saccharomyces cerevisiae (strain ATCC 204508 / S288c) GN=TIF35 PE=1 SV=1	Eukaryotic translation initiation factor 3 subunit G	TIF35	3.97517	3.83149	4.54974	4.24218	3.48332	2.081	0.221	0.625	0.815633
P32481	Eukaryotic translation initiation factor 2 subunit gamma OS=Saccharomyces cerevisiae (strain ATCC 204508 / S288c) GN=GCD11 PE=1 SV=1	Eukaryotic translation initiation factor 2 subunit gamma	GCD11	7.79017	7.92737	7.74742	7.65388	7.88265	2.064	0.223	0.623	0.815633
P10963	Phosphoenolpyruvate carboxykinase (ATP) OS=Saccharomyces cerevisiae (strain ATCC 204508 / S288c) GN=PCK1 PE=1 SV=2	Phosphoenolpyruvate carboxykinase (ATP)	PCK1	11.5631	11.5065	11.1904	11.1048	11.4272	2.051	0.225	0.621	0.815633
Q06338	Protein BCP1 OS=Saccharomyces cerevisiae (strain ATCC 204508 / S288c) GN=BCP1 PE=1 SV=1	Protein BCP1	BCP1	5.56197	5.39435	5.79223	5.91828	5.71928	2.046	0.226	0.621	0.815633
P16140	V-type proton ATPase subunit B OS=Saccharomyces cerevisiae (strain ATCC 204508 / S288c) GN=VMA2 PE=1 SV=2	V-type proton ATPase subunit B	VMA2	8.95483	8.95761	8.60195	8.7358	8.76139	2.035	0.228	0.619	0.815633
P13130	Sporulation-specific wall maturation protein OS=Saccharomyces cerevisiae (strain ATCC 204508 / S288c) GN=SPS100 PE=2 SV=1	Sporulation-specific wall maturation protein	SPS100	4.5322	3.77226	4.45598	5.61733	3.51186	2.013	0.231	0.617	0.815633
P00925	Enolase 2 OS=Saccharomyces cerevisiae (strain ATCC 204508 / S288c) GN=ENO2 PE=1 SV=2	Enolase 2	ENO2	10.3452	10.332	10.1278	9.87597	10.2006	1.974	0.237	0.612	0.815633
P53691	Peptidyl-prolyl cis-trans isomerase CPR6 OS=Saccharomyces cerevisiae (strain ATCC 204508 / S288c) GN=CPR6 PE=1 SV=1	Peptidyl-prolyl cis-trans isomerase CPR6	CPR6	9.2766	9.30574	9.14814	9.22703	9.19276	1.953	0.24	0.61	0.815633
P32453	Protein ATP11, mitochondrial OS=Saccharomyces cerevisiae (strain ATCC 204508 / S288c) GN=ATP11 PE=1 SV=1	Protein ATP11, mitochondrial	ATP11	5.33075	5.45653	5.20469	5.18851	5.39957	1.927	0.244	0.607	0.815633
A6ZVL3	Respiratory growth induced protein 2 OS=Saccharomyces cerevisiae (strain YJM789) GN=RGI2 PE=3 SV=1	Respiratory growth induced protein 2	RGI2	6.05263	5.84925	5.79797	5.66951	5.59671	1.918	0.246	0.605	0.815633
P46367	Potassium-activated aldehyde dehydrogenase, mitochondrial OS=Saccharomyces cerevisiae (strain ATCC 204508 / S288c) GN=ALD4 PE=1 SV=2	Potassium-activated aldehyde dehydrogenase, mitochondrial	ALD4	10.6738	10.5905	10.3784	10.3207	10.522	1.912	0.247	0.605	0.815633
C7GQJ1	Cell wall protein ECM33 OS=Saccharomyces cerevisiae (strain JAY291) GN=ECM33 PE=3 SV=1	Cell wall protein ECM33	ECM33	6.92111	7.07789	7.19763	7.34969	6.71992	1.9	0.249	0.603	0.815633
P05738	60S ribosomal protein L9-A OS=Saccharomyces cerevisiae (strain ATCC 204508 / S288c) GN=RPL9A PE=1 SV=2	60S ribosomal protein L9-A	RPL9A	7.24202	7.08856	6.77886	7.00121	7.14788	1.896	0.25	0.603	0.815633
P42938	Probable ATP-dependent kinase TDA10 OS=Saccharomyces cerevisiae (strain ATCC 204508 / S288c) GN=TDA10 PE=1 SV=1	Probable ATP-dependent kinase TDA10	TDA10	6.02415	5.89782	6.37967	5.93314	6.26951	1.89	0.25	0.602	0.815633
Q04371	Protein-glutamate O-methyltransferase OS=Saccharomyces cerevisiae (strain ATCC 204508 / S288c) GN=YMR027W PE=1 SV=1	Protein-glutamate O-methyltransferase	YMR027W	7.53356	7.50268	7.29891	7.42471	7.47673	1.885	0.251	0.601	0.815633
P05749	60S ribosomal protein L22-A OS=Saccharomyces cerevisiae (strain ATCC 204508 / S288c) GN=RPL22A PE=1 SV=3	60S ribosomal protein L22-A	RPL22A	7.13945	7.07188	6.6811	6.91347	7.00266	1.873	0.253	0.6	0.815633
P40327	26S protease regulatory subunit 4 homolog OS=Saccharomyces cerevisiae (strain ATCC 204508 / S288c) GN=RPT2 PE=1 SV=3	26S protease regulatory subunit 4 homolog	RPT2	7.54721	7.66584	7.3018	7.39517	7.50728	1.877	0.253	0.6	0.815633
P41940	Mannose-1-phosphate guanyltransferase OS=Saccharomyces cerevisiae (strain ATCC 204508 / S288c) GN=PSA1 PE=1 SV=2	Mannose-1-phosphate guanyltransferase	PSA1	8.3235	8.17592	8.1701	8.3294	8.11853	1.869	0.254	0.599	0.815633
P38968	Protein transport protein SEC31 OS=Saccharomyces cerevisiae (strain ATCC 204508 / S288c) GN=SEC31 PE=1 SV=3	Protein transport protein SEC31	SEC31	4.24385	3.82761	3.97766	3.99761	3.77797	1.866	0.254	0.599	0.815633
P53849	Zinc finger protein GIS2 OS=Saccharomyces cerevisiae (strain ATCC 204508 / S288c) GN=GIS2 PE=1 SV=1	Zinc finger protein GIS2	GIS2	4.25773	4.10669	4.93312	3.81564	4.41608	1.866	0.254	0.599	0.815633
P38701	40S ribosomal protein S20 OS=Saccharomyces cerevisiae (strain ATCC 204508 / S288c) GN=RPS20 PE=1 SV=3	40S ribosomal protein S20	RPS20	10.4153	10.5208	10.4324	10.1268	10.4473	1.844	0.258	0.596	0.815633
P40825	Alanine--tRNA ligase, mitochondrial OS=Saccharomyces cerevisiae (strain ATCC 204508 / S288c) GN=ALA1 PE=1 SV=3	Alanine--tRNA ligase, mitochondrial	ALA1	7.87759	7.77584	7.81833	7.67936	7.7898	1.838	0.259	0.595	0.815633
P12695	Dihydrolipoyllysine-residue acetyltransferase component of pyruvate dehydrogenase complex, mitochondrial OS=Saccharomyces cerevisiae (strain ATCC 204508 / S288c) GN=LAT1 PE=1 SV=1	Dihydrolipoyllysine-residue acetyltransferase component of pyruvate dehydrogenase complex, mitochondrial	LAT1	6.87662	6.87886	6.83434	6.49142	6.86143	1.832	0.26	0.594	0.815633
P00331	Alcohol dehydrogenase 2 OS=Saccharomyces cerevisiae (strain ATCC 204508 / S288c) GN=ADH2 PE=1 SV=3	Alcohol dehydrogenase 2	ADH2	10.5032	10.414	10.1374	10.3737	10.2318	1.83	0.261	0.594	0.815633
P38628	Phosphoacetylglucosamine mutase OS=Saccharomyces cerevisiae (strain ATCC 204508 / S288c) GN=PCM1 PE=1 SV=2	Phosphoacetylglucosamine mutase	PCM1	6.86077	6.82449	6.51815	6.54872	6.94266	1.83	0.261	0.594	0.815633
P32324	Elongation factor 2 OS=Saccharomyces cerevisiae (strain ATCC 204508 / S288c) GN=EFT1 PE=1 SV=1	Elongation factor 2	EFT1	12.004	11.9974	11.735	11.7296	11.894	1.821	0.262	0.593	0.815633
P07149	Fatty acid synthase subunit beta OS=Saccharomyces cerevisiae (strain ATCC 204508 / S288c) GN=FAS1 PE=1 SV=2	Fatty acid synthase subunit beta	FAS1	11.0401	11.1173	10.7923	10.7771	10.9156	1.821	0.262	0.593	0.815633
P22141	Proteasome subunit beta type-4 OS=Saccharomyces cerevisiae (strain ATCC 204508 / S288c) GN=PRE1 PE=1 SV=2	Proteasome subunit beta type-4	PRE1	6.43546	6.43378	6.17506	6.44174	6.31467	1.821	0.262	0.593	0.815633
P14540	Fructose-bisphosphate aldolase OS=Saccharomyces cerevisiae (strain ATCC 204508 / S288c) GN=FBA1 PE=1 SV=3	Fructose-bisphosphate aldolase	FBA1	10.1649	10.096	9.9591	10.2441	9.72203	1.818	0.263	0.593	0.815633
P41056	60S ribosomal protein L33-B OS=Saccharomyces cerevisiae (strain ATCC 204508 / S288c) GN=RPL33B PE=1 SV=2	60S ribosomal protein L33-B	RPL33B	6.45805	6.2487	5.95756	6.12137	6.24894	1.819	0.263	0.593	0.815633
P22202	Heat shock protein SSA4 OS=Saccharomyces cerevisiae (strain ATCC 204508 / S288c) GN=SSA4 PE=1 SV=3	Heat shock protein SSA4	SSA4	5.44795	5.11965	7.20151	5.05845	5.37517	1.811	0.264	0.592	0.815633
P34760	Peroxiredoxin TSA1 OS=Saccharomyces cerevisiae (strain ATCC 204508 / S288c) GN=TSA1 PE=1 SV=3	Peroxiredoxin TSA1	TSA1	9.26592	9.329	8.93863	9.03907	9.24231	1.8	0.266	0.59	0.815633
P0CS90	Heat shock protein SSC1, mitochondrial OS=Saccharomyces cerevisiae (strain ATCC 204508 / S288c) GN=SSC1 PE=1 SV=1	Heat shock protein SSC1, mitochondrial	SSC1	8.80628	8.6578	8.79261	8.94162	8.71214	1.788	0.268	0.589	0.815633
P15180	Lysine--tRNA ligase, cytoplasmic OS=Saccharomyces cerevisiae (strain ATCC 204508 / S288c) GN=KRS1 PE=1 SV=2	Lysine--tRNA ligase, cytoplasmic	KRS1	9.74418	9.67408	9.47827	9.64862	9.5976	1.791	0.268	0.589	0.815633
P38427	Trehalose synthase complex regulatory subunit TSL1 OS=Saccharomyces cerevisiae (strain ATCC 204508 / S288c) GN=TSL1 PE=1 SV=1	Trehalose synthase complex regulatory subunit TSL1	TSL1	6.6205	6.64094	6.59737	6.34916	6.527	1.791	0.268	0.589	0.815633
P38260	Hsp70 nucleotide exchange factor FES1 OS=Saccharomyces cerevisiae (strain ATCC 204508 / S288c) GN=FES1 PE=1 SV=1	Hsp70 nucleotide exchange factor FES1	FES1	6.43226	6.37768	6.14653	6.2905	6.52141	1.783	0.269	0.588	0.815633
Q08723	26S proteasome regulatory subunit RPN8 OS=Saccharomyces cerevisiae (strain ATCC 204508 / S288c) GN=RPN8 PE=1 SV=3	26S proteasome regulatory subunit RPN8	RPN8	6.68853	6.50185	6.35715	6.45232	6.58287	1.782	0.27	0.588	0.815633
Q12434	Rho GDP-dissociation inhibitor OS=Saccharomyces cerevisiae (strain ATCC 204508 / S288c) GN=RDI1 PE=1 SV=1	Rho GDP-dissociation inhibitor	RDI1	6.39151	6.41112	6.16924	6.08899	6.44516	1.765	0.273	0.585	0.815633
P39721	Protein AIM2 OS=Saccharomyces cerevisiae (strain ATCC 204508 / S288c) GN=AIM2 PE=1 SV=1	Protein AIM2	AIM2	6.59092	6.63551	6.75928	7.03223	6.48297	1.765	0.273	0.585	0.815633
P07256	Cytochrome b-c1 complex subunit 1, mitochondrial OS=Saccharomyces cerevisiae (strain ATCC 204508 / S288c) GN=COR1 PE=1 SV=1	Cytochrome b-c1 complex subunit 1, mitochondrial	COR1	6.20924	6.36994	5.97409	6.13167	6.31207	1.761	0.273	0.585	0.815633
P16862	ATP-dependent 6-phosphofructokinase subunit beta OS=Saccharomyces cerevisiae (strain ATCC 204508 / S288c) GN=PFK2 PE=1 SV=4	ATP-dependent 6-phosphofructokinase subunit beta	PFK2	10.4087	10.4303	10.2053	10.07	10.3714	1.758	0.274	0.584	0.815633
Q12250	26S proteasome regulatory subunit RPN5 OS=Saccharomyces cerevisiae (strain ATCC 204508 / S288c) GN=RPN5 PE=1 SV=3	26S proteasome regulatory subunit RPN5	RPN5	6.7156	6.7887	6.78368	6.60996	6.54947	1.756	0.274	0.584	0.815633
B5VK90	6-phosphogluconolactonase 3 OS=Saccharomyces cerevisiae (strain AWRI1631) GN=SOL3 PE=3 SV=1	6-phosphogluconolactonase 3	SOL3	5.58341	5.3474	5.48308	5.53659	5.27201	1.752	0.275	0.584	0.815633
P11412	Glucose-6-phosphate 1-dehydrogenase OS=Saccharomyces cerevisiae (strain ATCC 204508 / S288c) GN=ZWF1 PE=1 SV=4	Glucose-6-phosphate 1-dehydrogenase	ZWF1	7.81508	7.74052	7.76117	8.001	7.74527	1.749	0.276	0.583	0.815633
P38791	Deoxyhypusine synthase OS=Saccharomyces cerevisiae (strain ATCC 204508 / S288c) GN=DYS1 PE=1 SV=1	Deoxyhypusine synthase	DYS1	8.06878	8.02117	7.63243	7.67151	8.03783	1.747	0.276	0.583	0.815633
A6ZZH2	NADH-cytochrome b5 reductase 2 OS=Saccharomyces cerevisiae (strain YJM789) GN=MCR1 PE=3 SV=1	NADH-cytochrome b5 reductase 2	MCR1	6.45451	6.54466	7.0406	7.4573	6.23126	1.745	0.276	0.583	0.815633
P40037	Protein HMF1 OS=Saccharomyces cerevisiae (strain ATCC 204508 / S288c) GN=HMF1 PE=1 SV=1	Protein HMF1	HMF1	7.42449	7.37032	7.39679	7.18371	7.34755	1.742	0.277	0.582	0.815633
P15625	Phenylalanine--tRNA ligase alpha subunit OS=Saccharomyces cerevisiae (strain ATCC 204508 / S288c) GN=FRS2 PE=1 SV=3	Phenylalanine--tRNA ligase alpha subunit	FRS2	6.84683	6.94198	6.62115	6.54486	6.83729	1.737	0.278	0.582	0.815633
P19882	Heat shock protein 60, mitochondrial OS=Saccharomyces cerevisiae (strain ATCC 204508 / S288c) GN=HSP60 PE=1 SV=1	Heat shock protein 60, mitochondrial	HSP60	9.9247	9.86917	9.85616	9.86315	10.1062	1.713	0.283	0.578	0.815633
P54114	Aldehyde dehydrogenase [NAD(P)+] 2 OS=Saccharomyces cerevisiae (strain ATCC 204508 / S288c) GN=ALD3 PE=1 SV=1	Aldehyde dehydrogenase [NAD(P)+] 2	ALD3	8.92253	8.83355	8.51382	8.64602	8.76353	1.71	0.283	0.578	0.815633
Q12008	Phosphoglycerate mutase 2 OS=Saccharomyces cerevisiae (strain ATCC 204508 / S288c) GN=GPM2 PE=1 SV=1	Phosphoglycerate mutase 2	GPM2	4.44427	4.38343	4.35924	3.98532	4.50122	1.709	0.283	0.578	0.815633
P0CX37	40S ribosomal protein S6-A OS=Saccharomyces cerevisiae (strain ATCC 204508 / S288c) GN=RPS6A PE=1 SV=1	40S ribosomal protein S6-A	RPS6A	8.95213	9.0721	9.26194	8.5804	8.97678	1.701	0.285	0.576	0.815633
Q02753	60S ribosomal protein L21-A OS=Saccharomyces cerevisiae (strain ATCC 204508 / S288c) GN=RPL21A PE=1 SV=1	60S ribosomal protein L21-A	RPL21A	8.08947	7.9669	9.06719	8.48283	7.88897	1.702	0.285	0.577	0.815633
P38708	Putative proline--tRNA ligase YHR020W OS=Saccharomyces cerevisiae (strain ATCC 204508 / S288c) GN=YHR020W PE=1 SV=1	Putative proline--tRNA ligase YHR020W	YHR020W	5.43793	5.42217	4.87847	4.90514	4.68368	1.694	0.286	0.575	0.815633
P0CX30	40S ribosomal protein S23-B OS=Saccharomyces cerevisiae (strain ATCC 204508 / S288c) GN=RPS23B PE=1 SV=1	40S ribosomal protein S23-B	RPS23B	7.35449	6.85574	7.67699	8.43477	6.84604	1.683	0.289	0.574	0.815633
P0CX32	40S ribosomal protein S24-B OS=Saccharomyces cerevisiae (strain ATCC 204508 / S288c) GN=RPS24B PE=1 SV=1	40S ribosomal protein S24-B	RPS24B	8.54648	8.37658	8.96671	8.86984	8.18762	1.683	0.289	0.574	0.815633
P50861	6,7-dimethyl-8-ribityllumazine synthase OS=Saccharomyces cerevisiae (strain ATCC 204508 / S288c) GN=RIB4 PE=1 SV=2	6,7-dimethyl-8-ribityllumazine synthase	RIB4	8.54775	8.47338	8.02574	8.05252	8.4085	1.674	0.29	0.573	0.815633
P40303	Proteasome subunit alpha type-4 OS=Saccharomyces cerevisiae (strain ATCC 204508 / S288c) GN=PRE6 PE=1 SV=1	Proteasome subunit alpha type-4	PRE6	6.04373	6.07214	6.53328	6.52243	6.13317	1.675	0.29	0.573	0.815633
P32599	Fimbrin OS=Saccharomyces cerevisiae (strain ATCC 204508 / S288c) GN=SAC6 PE=1 SV=1	Fimbrin	SAC6	6.2502	6.18085	5.90091	6.01927	6.24466	1.674	0.291	0.572	0.815633
P47136	Bud site selection protein 4 OS=Saccharomyces cerevisiae (strain ATCC 204508 / S288c) GN=BUD4 PE=1 SV=2	Bud site selection protein 4	BUD4	7.07677	7.03053	6.56708	6.57679	7.12092	1.672	0.291	0.572	0.815633
P41338	Acetyl-CoA acetyltransferase OS=Saccharomyces cerevisiae (strain ATCC 204508 / S288c) GN=ERG10 PE=1 SV=3	Acetyl-CoA acetyltransferase	ERG10	9.37788	9.39919	9.15543	8.99643	9.28228	1.662	0.293	0.571	0.815633
P0C2H8	60S ribosomal protein L31-A OS=Saccharomyces cerevisiae (strain ATCC 204508 / S288c) GN=RPL31A PE=1 SV=1	60S ribosomal protein L31-A	RPL31A	5.73355	5.11651	6.75782	6.24294	5.59533	1.662	0.293	0.571	0.815633
P54838	Dihydroxyacetone kinase 1 OS=Saccharomyces cerevisiae (strain ATCC 204508 / S288c) GN=DAK1 PE=1 SV=1	Dihydroxyacetone kinase 1	DAK1	7.79476	8.00361	7.67238	7.73323	7.80545	1.655	0.294	0.57	0.815633
P0CX36	40S ribosomal protein S4-B OS=Saccharomyces cerevisiae (strain ATCC 204508 / S288c) GN=RPS4B PE=1 SV=1	40S ribosomal protein S4-B	RPS4B	10.063	10.1195	9.83046	9.54665	10.0767	1.641	0.297	0.568	0.815633
P22336	Replication factor A protein 1 OS=Saccharomyces cerevisiae (strain ATCC 204508 / S288c) GN=RFA1 PE=1 SV=1	Replication factor A protein 1	RFA1	6.09381	6.05545	5.73884	6.05047	6.01502	1.641	0.297	0.568	0.815633
P04147	Polyadenylate-binding protein, cytoplasmic and nuclear OS=Saccharomyces cerevisiae (strain ATCC 204508 / S288c) GN=PAB1 PE=1 SV=4	Polyadenylate-binding protein, cytoplasmic and nuclear	PAB1	6.95725	6.991	7.60694	6.87603	6.92633	1.635	0.299	0.567	0.815633
P04806	Hexokinase-1 OS=Saccharomyces cerevisiae (strain ATCC 204508 / S288c) GN=HXK1 PE=1 SV=2	Hexokinase-1	HXK1	10.4799	10.5034	10.2007	10.2696	10.3009	1.63	0.3	0.566	0.815633
P40069	Importin subunit beta-4 OS=Saccharomyces cerevisiae (strain ATCC 204508 / S288c) GN=KAP123 PE=1 SV=1	Importin subunit beta-4	KAP123	6.77761	6.9946	7.2005	7.42161	6.48427	1.629	0.3	0.566	0.815633
P32589	Heat shock protein homolog SSE1 OS=Saccharomyces cerevisiae (strain ATCC 204508 / S288c) GN=SSE1 PE=1 SV=4	Heat shock protein homolog SSE1	SSE1	10.2318	10.1654	10.0441	10.1002	10.0734	1.623	0.301	0.565	0.815633
P41939	Isocitrate dehydrogenase [NADP] cytoplasmic OS=Saccharomyces cerevisiae (strain ATCC 204508 / S288c) GN=IDP2 PE=1 SV=2	Isocitrate dehydrogenase [NADP] cytoplasmic	IDP2	9.35936	9.2319	8.90944	9.09081	9.18662	1.623	0.301	0.565	0.815633
P07246	Alcohol dehydrogenase 3, mitochondrial OS=Saccharomyces cerevisiae (strain ATCC 204508 / S288c) GN=ADH3 PE=1 SV=2	Alcohol dehydrogenase 3, mitochondrial	ADH3	9.72979	9.63982	9.24233	9.23244	9.57663	1.615	0.303	0.564	0.815633
Q03161	Glucose-6-phosphate 1-epimerase OS=Saccharomyces cerevisiae (strain ATCC 204508 / S288c) GN=YMR099C PE=1 SV=1	Glucose-6-phosphate 1-epimerase	YMR099C	5.8449	5.60716	5.51446	5.82211	5.59662	1.603	0.306	0.562	0.815633
P13663	Aspartate-semialdehyde dehydrogenase OS=Saccharomyces cerevisiae (strain ATCC 204508 / S288c) GN=HOM2 PE=1 SV=1	Aspartate-semialdehyde dehydrogenase	HOM2	8.82376	8.71763	8.82647	8.74294	8.65961	1.584	0.31	0.559	0.815633
P17505	Malate dehydrogenase, mitochondrial OS=Saccharomyces cerevisiae (strain ATCC 204508 / S288c) GN=MDH1 PE=1 SV=2	Malate dehydrogenase, mitochondrial	MDH1	9.66059	9.66375	9.35032	9.48155	9.57887	1.573	0.312	0.557	0.815633
P26321	60S ribosomal protein L5 OS=Saccharomyces cerevisiae (strain ATCC 204508 / S288c) GN=RPL5 PE=1 SV=4	60S ribosomal protein L5	RPL5	6.98115	6.84712	8.11107	6.94818	6.82668	1.566	0.314	0.556	0.815633
Q12443	Reticulon-like protein 2 OS=Saccharomyces cerevisiae (strain ATCC 204508 / S288c) GN=RTN2 PE=1 SV=1	Reticulon-like protein 2	RTN2	6.96739	6.99385	6.7422	6.64881	6.99334	1.567	0.314	0.556	0.815633
Q3E757	60S ribosomal protein L11-B OS=Saccharomyces cerevisiae (strain ATCC 204508 / S288c) GN=RPL11B PE=1 SV=3	60S ribosomal protein L11-B	RPL11B	9.48909	9.59251	9.44146	9.35179	9.40834	1.561	0.315	0.555	0.815633
P00812	Arginase OS=Saccharomyces cerevisiae (strain ATCC 204508 / S288c) GN=CAR1 PE=1 SV=1	Arginase	CAR1	5.41151	5.40151	5.74788	5.47827	5.93061	1.555	0.316	0.554	0.815633
Q06287	Ribosomal RNA small subunit methyltransferase NEP1 OS=Saccharomyces cerevisiae (strain ATCC 204508 / S288c) GN=EMG1 PE=1 SV=1	Ribosomal RNA small subunit methyltransferase NEP1	EMG1	6.79037	6.77387	6.47667	6.46227	6.80319	1.551	0.317	0.554	0.815633
P14907	Nucleoporin NSP1 OS=Saccharomyces cerevisiae (strain ATCC 204508 / S288c) GN=NSP1 PE=1 SV=1	Nucleoporin NSP1	NSP1	5.87313	5.71737	5.66468	5.61604	5.78995	1.548	0.318	0.553	0.815633
P00924	Enolase 1 OS=Saccharomyces cerevisiae (strain ATCC 204508 / S288c) GN=ENO1 PE=1 SV=3	Enolase 1	ENO1	11.3771	11.4234	11.2797	11.5525	11.2948	1.545	0.319	0.553	0.815633
P27476	Nuclear localization sequence-binding protein OS=Saccharomyces cerevisiae (strain ATCC 204508 / S288c) GN=NSR1 PE=1 SV=1	Nuclear localization sequence-binding protein	NSR1	5.01945	5.27495	5.75261	5.72988	5.23592	1.544	0.319	0.553	0.815633
P05626	ATP synthase subunit 4, mitochondrial OS=Saccharomyces cerevisiae (strain ATCC 204508 / S288c) GN=ATP4 PE=1 SV=2	ATP synthase subunit 4, mitochondrial	ATP4	7.11692	7.23481	7.08016	7.41033	7.29637	1.542	0.319	0.552	0.815633
P05317	60S acidic ribosomal protein P0 OS=Saccharomyces cerevisiae (strain ATCC 204508 / S288c) GN=RPP0 PE=1 SV=2	60S acidic ribosomal protein P0	RPP0	10.2055	10.1439	10.0965	10.0837	10.0103	1.541	0.32	0.552	0.815633
A6ZNQ1	ATP-dependent RNA helicase DBP5 OS=Saccharomyces cerevisiae (strain YJM789) GN=DBP5 PE=3 SV=1	ATP-dependent RNA helicase DBP5	DBP5	6.13234	6.06146	5.72417	5.94493	5.9303	1.537	0.321	0.551	0.815633
P47176	Branched-chain-amino-acid aminotransferase, cytosolic OS=Saccharomyces cerevisiae (strain ATCC 204508 / S288c) GN=BAT2 PE=1 SV=1	Branched-chain-amino-acid aminotransferase, cytosolic	BAT2	7.9351	7.92974	7.68987	7.89049	7.80631	1.526	0.323	0.55	0.815633
P39730	Eukaryotic translation initiation factor 5B OS=Saccharomyces cerevisiae (strain ATCC 204508 / S288c) GN=FUN12 PE=1 SV=2	Eukaryotic translation initiation factor 5B	FUN12	7.48147	7.34266	7.13473	7.40395	7.49751	1.528	0.323	0.55	0.815633
P02829	ATP-dependent molecular chaperone HSP82 OS=Saccharomyces cerevisiae (strain ATCC 204508 / S288c) GN=HSP82 PE=1 SV=1	ATP-dependent molecular chaperone HSP82	HSP82	11.794	11.8037	11.5852	11.4903	11.6143	1.514	0.326	0.548	0.815633
Q04894	NADP-dependent alcohol dehydrogenase 6 OS=Saccharomyces cerevisiae (strain ATCC 204508 / S288c) GN=ADH6 PE=1 SV=1	NADP-dependent alcohol dehydrogenase 6	ADH6	8.36426	8.31771	7.81646	7.95044	8.19927	1.507	0.327	0.547	0.815633
Q12363	Transcriptional modulator WTM1 OS=Saccharomyces cerevisiae (strain ATCC 204508 / S288c) GN=WTM1 PE=1 SV=1	Transcriptional modulator WTM1	WTM1	9.5671	9.53964	9.36409	9.42337	9.4413	1.505	0.328	0.546	0.815633
P54115	Magnesium-activated aldehyde dehydrogenase, cytosolic OS=Saccharomyces cerevisiae (strain ATCC 204508 / S288c) GN=ALD6 PE=1 SV=4	Magnesium-activated aldehyde dehydrogenase, cytosolic	ALD6	10.5002	10.3986	9.98444	10.0508	10.3739	1.496	0.33	0.545	0.815633
P00931	Tryptophan synthase OS=Saccharomyces cerevisiae (strain ATCC 204508 / S288c) GN=TRP5 PE=1 SV=1	Tryptophan synthase	TRP5	8.11726	8.21052	7.92814	7.96518	8.05568	1.49	0.332	0.544	0.815633
P29952	Mannose-6-phosphate isomerase OS=Saccharomyces cerevisiae (strain ATCC 204508 / S288c) GN=PMI40 PE=1 SV=4	Mannose-6-phosphate isomerase	PMI40	8.42832	8.44299	8.16651	8.22976	8.37708	1.488	0.332	0.543	0.815633
P07280	40S ribosomal protein S19-A OS=Saccharomyces cerevisiae (strain ATCC 204508 / S288c) GN=RPS19A PE=1 SV=2	40S ribosomal protein S19-A	RPS19A	6.87564	7.04087	6.92946	6.90576	6.98439	1.486	0.333	0.543	0.815633
P07259	Protein URA2 OS=Saccharomyces cerevisiae (strain ATCC 204508 / S288c) GN=URA2 PE=1 SV=5	Protein URA2	URA2	8.44158	9.3162	8.13332	8.24729	8.40401	1.486	0.333	0.543	0.815633
P53912	Uncharacterized protein YNL134C OS=Saccharomyces cerevisiae (strain ATCC 204508 / S288c) GN=YNL134C PE=1 SV=1	Uncharacterized protein YNL134C	YNL134C	9.62477	9.46968	9.1631	9.18432	9.47246	1.482	0.334	0.543	0.815633
P41921	Glutathione reductase OS=Saccharomyces cerevisiae (strain ATCC 204508 / S288c) GN=GLR1 PE=1 SV=2	Glutathione reductase	GLR1	7.68509	7.49219	7.95627	8.23469	7.50432	1.475	0.335	0.541	0.815633
P38075	Pyridoxamine 5'-phosphate oxidase OS=Saccharomyces cerevisiae (strain ATCC 204508 / S288c) GN=PDX3 PE=1 SV=1	Pyridoxamine 5'-phosphate oxidase	PDX3	6.11499	6.14304	6.41349	6.35032	6.02274	1.477	0.335	0.542	0.815633
P53081	NGG1-interacting factor 3 OS=Saccharomyces cerevisiae (strain ATCC 204508 / S288c) GN=NIF3 PE=1 SV=1	NGG1-interacting factor 3	NIF3	7.93828	7.93039	7.17239	7.05129	7.95781	1.478	0.335	0.542	0.815633
A6ZQJ1	ATP-dependent RNA helicase eIF4A OS=Saccharomyces cerevisiae (strain YJM789) GN=TIF1 PE=3 SV=1	ATP-dependent RNA helicase eIF4A	TIF1	11.4407	11.3776	11.0076	11.0177	11.2449	1.463	0.338	0.539	0.815633
P07806	Valine--tRNA ligase, mitochondrial OS=Saccharomyces cerevisiae (strain ATCC 204508 / S288c) GN=VAS1 PE=1 SV=2	Valine--tRNA ligase, mitochondrial	VAS1	9.10343	9.16277	8.90795	8.94113	9.06904	1.464	0.338	0.539	0.815633
P05694	5-methyltetrahydropteroyltriglutamate--homocysteine methyltransferase OS=Saccharomyces cerevisiae (strain ATCC 204508 / S288c) GN=MET6 PE=1 SV=4	5-methyltetrahydropteroyltriglutamate--homocysteine methyltransferase	MET6	9.19227	9.22009	8.88607	8.89442	9.14941	1.455	0.34	0.538	0.815633
P08679	Citrate synthase, peroxisomal OS=Saccharomyces cerevisiae (strain ATCC 204508 / S288c) GN=CIT2 PE=1 SV=1	Citrate synthase, peroxisomal	CIT2	6.06496	5.924	6.10272	6.17974	5.76816	1.457	0.34	0.538	0.815633
P33892	eIF-2-alpha kinase activator GCN1 OS=Saccharomyces cerevisiae (strain ATCC 204508 / S288c) GN=GCN1 PE=1 SV=1	eIF-2-alpha kinase activator GCN1	GCN1	6.74664	6.79522	6.47275	6.65791	6.77447	1.458	0.34	0.538	0.815633
P22943	12 kDa heat shock protein OS=Saccharomyces cerevisiae (strain ATCC 204508 / S288c) GN=HSP12 PE=1 SV=1	12 kDa heat shock protein	HSP12	10.1889	10.2309	10.6362	10.0703	10.1435	1.452	0.341	0.537	0.815633
Q12123	Inactive diphosphatase DCS2 OS=Saccharomyces cerevisiae (strain ATCC 204508 / S288c) GN=DCS2 PE=1 SV=3	Inactive diphosphatase DCS2	DCS2	7.01773	7.17146	6.74557	6.85598	6.91479	1.445	0.343	0.536	0.815633
P00937	Multifunctional tryptophan biosynthesis protein OS=Saccharomyces cerevisiae (strain ATCC 204508 / S288c) GN=TRP3 PE=1 SV=2	Multifunctional tryptophan biosynthesis protein	TRP3	6.32572	6.30438	6.23944	5.9953	6.25236	1.441	0.344	0.535	0.815633
P41805	60S ribosomal protein L10 OS=Saccharomyces cerevisiae (strain ATCC 204508 / S288c) GN=RPL10 PE=1 SV=1	60S ribosomal protein L10	RPL10	9.64056	9.3999	9.44519	9.19256	9.49454	1.431	0.346	0.534	0.815633
P09624	Dihydrolipoyl dehydrogenase, mitochondrial OS=Saccharomyces cerevisiae (strain ATCC 204508 / S288c) GN=LPD1 PE=1 SV=1	Dihydrolipoyl dehydrogenase, mitochondrial	LPD1	10.1072	10.0503	9.63574	9.77448	9.9156	1.429	0.347	0.533	0.815633
P07251	ATP synthase subunit alpha, mitochondrial OS=Saccharomyces cerevisiae (strain ATCC 204508 / S288c) GN=ATP1 PE=1 SV=5	ATP synthase subunit alpha, mitochondrial	ATP1	9.58568	9.44772	9.48904	9.61475	9.42897	1.431	0.347	0.534	0.815633
P21954	Isocitrate dehydrogenase [NADP], mitochondrial OS=Saccharomyces cerevisiae (strain ATCC 204508 / S288c) GN=IDP1 PE=1 SV=1	Isocitrate dehydrogenase [NADP], mitochondrial	IDP1	6.82256	6.9497	6.79195	6.61208	6.85475	1.429	0.347	0.533	0.815633
P16387	Pyruvate dehydrogenase E1 component subunit alpha, mitochondrial OS=Saccharomyces cerevisiae (strain ATCC 204508 / S288c) GN=PDA1 PE=1 SV=2	Pyruvate dehydrogenase E1 component subunit alpha, mitochondrial	PDA1	8.13207	8.19343	7.74228	7.79701	8.11492	1.43	0.347	0.534	0.815633
Q04432	Glutathione-independent glyoxalase HSP31 OS=Saccharomyces cerevisiae (strain ATCC 204508 / S288c) GN=HSP31 PE=1 SV=1	Glutathione-independent glyoxalase HSP31	HSP31	8.55105	8.63256	8.52524	8.36866	8.54439	1.424	0.348	0.533	0.815633
Q04336	Uncharacterized protein YMR196W OS=Saccharomyces cerevisiae (strain ATCC 204508 / S288c) GN=YMR196W PE=1 SV=1	Uncharacterized protein YMR196W	YMR196W	7.38351	7.42178	7.00793	7.07563	7.31682	1.419	0.35	0.532	0.815633
P29547	Elongation factor 1-gamma 1 OS=Saccharomyces cerevisiae (strain ATCC 204508 / S288c) GN=CAM1 PE=1 SV=2	Elongation factor 1-gamma 1	CAM1	9.8481	9.7176	9.4446	9.61174	9.63201	1.414	0.351	0.531	0.815633
P48164	40S ribosomal protein S7-B OS=Saccharomyces cerevisiae (strain ATCC 204508 / S288c) GN=RPS7B PE=1 SV=1	40S ribosomal protein S7-B	RPS7B	10.228	10.2586	10.0437	10.0095	10.1041	1.41	0.352	0.53	0.815633
A6ZWL1	Nascent polypeptide-associated complex subunit beta-1 OS=Saccharomyces cerevisiae (strain YJM789) GN=EGD1 PE=3 SV=1	Nascent polypeptide-associated complex subunit beta-1	EGD1	6.04896	5.84002	7.80663	5.66605	8.14279	1.411	0.352	0.53	0.815633
C7GVZ9	40S ribosomal protein S1-B OS=Saccharomyces cerevisiae (strain JAY291) GN=RPS1B PE=3 SV=1	40S ribosomal protein S1-B	RPS1B	8.64656	8.62395	8.39678	8.63191	8.44907	1.397	0.355	0.528	0.815633
P16474	78 kDa glucose-regulated protein homolog OS=Saccharomyces cerevisiae (strain ATCC 204508 / S288c) GN=KAR2 PE=1 SV=1	78 kDa glucose-regulated protein homolog	KAR2	7.23039	7.29964	7.67431	7.12414	7.42433	1.396	0.356	0.528	0.815633
P54839	Hydroxymethylglutaryl-CoA synthase OS=Saccharomyces cerevisiae (strain ATCC 204508 / S288c) GN=ERG13 PE=1 SV=1	Hydroxymethylglutaryl-CoA synthase	ERG13	9.47806	9.49037	9.25232	9.28442	9.40748	1.389	0.357	0.526	0.815633
P32911	Eukaryotic translation initiation factor eIF-1 OS=Saccharomyces cerevisiae (strain ATCC 204508 / S288c) GN=SUI1 PE=1 SV=1	Eukaryotic translation initiation factor eIF-1	SUI1	6.97014	6.79216	6.69613	6.86226	6.81509	1.389	0.358	0.526	0.815633
Q99190	Very-long-chain enoyl-CoA reductase OS=Saccharomyces cerevisiae (strain ATCC 204508 / S288c) GN=TSC13 PE=1 SV=1	Very-long-chain enoyl-CoA reductase	TSC13	5.72496	6.02761	5.79599	5.70696	6.00614	1.388	0.358	0.526	0.815633
P02293	Histone H2B.1 OS=Saccharomyces cerevisiae (strain ATCC 204508 / S288c) GN=HTB1 PE=1 SV=2	Histone H2B.1	HTB1	8.42246	8.21607	8.46328	8.57016	8.1634	1.382	0.359	0.525	0.815633
P26263	Pyruvate decarboxylase isozyme 3 OS=Saccharomyces cerevisiae (strain ATCC 204508 / S288c) GN=PDC6 PE=1 SV=3	Pyruvate decarboxylase isozyme 3	PDC6	9.2285	9.20345	8.78656	8.79921	9.15544	1.377	0.361	0.524	0.815633
P23254	Transketolase 1 OS=Saccharomyces cerevisiae (strain ATCC 204508 / S288c) GN=TKL1 PE=1 SV=4	Transketolase 1	TKL1	8.99572	9.12107	8.76444	8.84885	9.02731	1.375	0.361	0.524	0.815633
P32582	Cystathionine beta-synthase OS=Saccharomyces cerevisiae (strain ATCC 204508 / S288c) GN=CYS4 PE=1 SV=1	Cystathionine beta-synthase	CYS4	10.0969	9.99612	9.7015	9.762	9.9935	1.371	0.362	0.523	0.815633
P39003	High-affinity hexose transporter HXT6 OS=Saccharomyces cerevisiae (strain ATCC 204508 / S288c) GN=HXT6 PE=1 SV=2	High-affinity hexose transporter HXT6	HXT6	7.70755	7.76681	7.86455	8.05603	7.69379	1.373	0.362	0.523	0.815633
P17649	4-aminobutyrate aminotransferase OS=Saccharomyces cerevisiae (strain ATCC 204508 / S288c) GN=UGA1 PE=1 SV=2	4-aminobutyrate aminotransferase	UGA1	9.80448	9.78904	9.33293	9.34123	9.7219	1.368	0.363	0.523	0.815633
Q12497	Protein FMP16, mitochondrial OS=Saccharomyces cerevisiae (strain ATCC 204508 / S288c) GN=FMP16 PE=1 SV=1	Protein FMP16, mitochondrial	FMP16	8.72853	8.69918	8.54664	8.30933	8.56489	1.365	0.364	0.522	0.815633
P19097	Fatty acid synthase subunit alpha OS=Saccharomyces cerevisiae (strain ATCC 204508 / S288c) GN=FAS2 PE=1 SV=2	Fatty acid synthase subunit alpha	FAS2	9.42488	9.38925	9.23784	9.18765	9.25329	1.361	0.365	0.521	0.815633
P04840	Mitochondrial outer membrane protein porin 1 OS=Saccharomyces cerevisiae (strain ATCC 204508 / S288c) GN=POR1 PE=1 SV=4	Mitochondrial outer membrane protein porin 1	POR1	10.7362	10.8076	10.3478	10.5881	10.8823	1.363	0.365	0.522	0.815633
Q3E792	40S ribosomal protein S25-A OS=Saccharomyces cerevisiae (strain ATCC 204508 / S288c) GN=RPS25A PE=1 SV=1	40S ribosomal protein S25-A	RPS25A	9.2793	9.13858	9.04296	8.99974	9.24033	1.363	0.365	0.522	0.815633
Q08220	Glutathione synthetase OS=Saccharomyces cerevisiae (strain ATCC 204508 / S288c) GN=GSH2 PE=1 SV=1	Glutathione synthetase	GSH2	4.16115	4.60447	4.51473	4.55509	4.14882	1.358	0.366	0.521	0.815633
P49435	Adenine phosphoribosyltransferase 1 OS=Saccharomyces cerevisiae (strain ATCC 204508 / S288c) GN=APT1 PE=1 SV=3	Adenine phosphoribosyltransferase 1	APT1	8.59187	8.49901	8.24477	8.23528	8.50189	1.357	0.366	0.521	0.815633
Q06494	Putative pyridoxal reductase OS=Saccharomyces cerevisiae (strain ATCC 204508 / S288c) GN=YPR127W PE=1 SV=1	Putative pyridoxal reductase	YPR127W	8.60578	8.68701	8.50907	8.2423	8.50616	1.355	0.367	0.52	0.815633
P15705	Heat shock protein STI1 OS=Saccharomyces cerevisiae (strain ATCC 204508 / S288c) GN=STI1 PE=1 SV=1	Heat shock protein STI1	STI1	8.87522	8.82479	8.56265	8.66713	8.73537	1.35	0.368	0.519	0.815633
P00424	Cytochrome c oxidase polypeptide 5A, mitochondrial OS=Saccharomyces cerevisiae (strain ATCC 204508 / S288c) GN=COX5A PE=1 SV=1	Cytochrome c oxidase polypeptide 5A, mitochondrial	COX5A	5.388	5.53406	5.20652	5.26911	5.61837	1.353	0.368	0.52	0.815633
P09457	ATP synthase subunit 5, mitochondrial OS=Saccharomyces cerevisiae (strain ATCC 204508 / S288c) GN=ATP5 PE=1 SV=1	ATP synthase subunit 5, mitochondrial	ATP5	6.0605	6.1719	6.13415	6.46978	5.99872	1.35	0.368	0.519	0.815633
P46969	Ribulose-phosphate 3-epimerase OS=Saccharomyces cerevisiae (strain ATCC 204508 / S288c) GN=RPE1 PE=1 SV=1	Ribulose-phosphate 3-epimerase	RPE1	5.66239	5.66468	6.16157	5.40505	5.57705	1.347	0.369	0.519	0.815633
Q3E7X9	40S ribosomal protein S28-A OS=Saccharomyces cerevisiae (strain ATCC 204508 / S288c) GN=RPS28A PE=1 SV=1	40S ribosomal protein S28-A	RPS28A	7.27814	7.42783	7.48033	7.32491	7.13423	1.347	0.369	0.519	0.815633
A6ZRW6	Malate synthase 1, glyoxysomal OS=Saccharomyces cerevisiae (strain YJM789) GN=MLS1 PE=3 SV=1	Malate synthase 1, glyoxysomal	MLS1	10.3739	10.3206	9.92	9.84029	10.237	1.345	0.37	0.518	0.815633
P39516	40S ribosomal protein S14-B OS=Saccharomyces cerevisiae (strain ATCC 204508 / S288c) GN=RPS14B PE=1 SV=2	40S ribosomal protein S14-B	RPS14B	9.26851	9.19468	8.87261	8.83191	9.22286	1.332	0.373	0.516	0.815633
P20967	2-oxoglutarate dehydrogenase, mitochondrial OS=Saccharomyces cerevisiae (strain ATCC 204508 / S288c) GN=KGD1 PE=1 SV=2	2-oxoglutarate dehydrogenase, mitochondrial	KGD1	9.57818	9.59552	9.29564	9.26876	9.49947	1.328	0.374	0.515	0.815633
P26785	60S ribosomal protein L16-B OS=Saccharomyces cerevisiae (strain ATCC 204508 / S288c) GN=RPL16B PE=1 SV=3	60S ribosomal protein L16-B	RPL16B	8.23168	8.11007	8.61765	8.907	8.04346	1.327	0.375	0.515	0.815633
P35691	Translationally-controlled tumor protein homolog OS=Saccharomyces cerevisiae (strain ATCC 204508 / S288c) GN=TMA19 PE=1 SV=1	Translationally-controlled tumor protein homolog	TMA19	8.44541	8.42657	8.40594	8.47212	8.26103	1.324	0.376	0.514	0.815633
A6ZR36	Altered inheritance of mitochondria protein 9, mitochondrial OS=Saccharomyces cerevisiae (strain YJM789) GN=AIM9 PE=3 SV=1	Altered inheritance of mitochondria protein 9, mitochondrial	AIM9	5.71424	5.86337	5.76918	5.94943	5.90358	1.318	0.377	0.513	0.815633
P20081	FK506-binding protein 1 OS=Saccharomyces cerevisiae (strain ATCC 204508 / S288c) GN=FPR1 PE=1 SV=2	FK506-binding protein 1	FPR1	7.63749	7.5528	8.21575	7.96285	7.37005	1.312	0.379	0.512	0.815633
Q12377	26S proteasome regulatory subunit RPN6 OS=Saccharomyces cerevisiae (strain ATCC 204508 / S288c) GN=RPN6 PE=1 SV=3	26S proteasome regulatory subunit RPN6	RPN6	6.26156	6.23318	6.28845	6.58032	5.99703	1.313	0.379	0.512	0.815633
P38237	Ubiquitin carboxyl-terminal hydrolase 14 OS=Saccharomyces cerevisiae (strain ATCC 204508 / S288c) GN=UBP14 PE=1 SV=2	Ubiquitin carboxyl-terminal hydrolase 14	UBP14	5.55939	5.21053	5.3346	5.56335	5.61896	1.307	0.38	0.511	0.815633
P38972	Phosphoribosylformylglycinamidine synthase OS=Saccharomyces cerevisiae (strain ATCC 204508 / S288c) GN=ADE6 PE=1 SV=2	Phosphoribosylformylglycinamidine synthase	ADE6	8.37108	8.31287	8.15824	8.05874	8.28889	1.305	0.381	0.511	0.815633
P38720	6-phosphogluconate dehydrogenase, decarboxylating 1 OS=Saccharomyces cerevisiae (strain ATCC 204508 / S288c) GN=GND1 PE=1 SV=1	6-phosphogluconate dehydrogenase, decarboxylating 1	GND1	9.76763	9.65911	9.40175	9.40174	9.67545	1.296	0.384	0.509	0.815633
P32598	Serine/threonine-protein phosphatase PP1-2 OS=Saccharomyces cerevisiae (strain ATCC 204508 / S288c) GN=GLC7 PE=1 SV=1	Serine/threonine-protein phosphatase PP1-2	GLC7	5.01769	4.83855	4.99392	5.15435	5.15068	1.289	0.386	0.508	0.815633
P39935	Eukaryotic initiation factor 4F subunit p150 OS=Saccharomyces cerevisiae (strain ATCC 204508 / S288c) GN=TIF4631 PE=1 SV=2	Eukaryotic initiation factor 4F subunit p150	TIF4631	9.35922	9.38941	8.76428	8.79921	9.25968	1.286	0.387	0.507	0.815633
P32454	Aminopeptidase 2, mitochondrial OS=Saccharomyces cerevisiae (strain ATCC 204508 / S288c) GN=APE2 PE=1 SV=4	Aminopeptidase 2, mitochondrial	APE2	9.1861	9.18903	8.84607	8.99341	9.04168	1.283	0.388	0.507	0.815633
P43567	Alanine--glyoxylate aminotransferase 1 OS=Saccharomyces cerevisiae (strain ATCC 204508 / S288c) GN=AGX1 PE=1 SV=1	Alanine--glyoxylate aminotransferase 1	AGX1	7.52112	7.43387	7.17385	7.31908	7.40192	1.278	0.389	0.505	0.815633
P38711	40S ribosomal protein S27-B OS=Saccharomyces cerevisiae (strain ATCC 204508 / S288c) GN=RPS27B PE=1 SV=1	40S ribosomal protein S27-B	RPS27B	9.41936	9.47111	9.32776	9.19411	9.169	1.275	0.39	0.505	0.815633
P38810	SED5-binding protein 3 OS=Saccharomyces cerevisiae (strain ATCC 204508 / S288c) GN=SFB3 PE=1 SV=1	SED5-binding protein 3	SFB3	6.29808	6.33066	6.26105	6.09242	6.20675	1.27	0.392	0.504	0.815633
P17555	Adenylyl cyclase-associated protein OS=Saccharomyces cerevisiae (strain ATCC 204508 / S288c) GN=SRV2 PE=1 SV=1	Adenylyl cyclase-associated protein	SRV2	5.24244	6.09028	5.80366	6.12212	5.30982	1.269	0.392	0.504	0.815633
P14843	Phospho-2-dehydro-3-deoxyheptonate aldolase, phenylalanine-inhibited OS=Saccharomyces cerevisiae (strain ATCC 204508 / S288c) GN=ARO3 PE=1 SV=1	Phospho-2-dehydro-3-deoxyheptonate aldolase, phenylalanine-inhibited	ARO3	5.79873	5.59602	5.37532	5.22742	5.65659	1.265	0.393	0.503	0.815633
P28241	Isocitrate dehydrogenase [NAD] subunit 2, mitochondrial OS=Saccharomyces cerevisiae (strain ATCC 204508 / S288c) GN=IDH2 PE=1 SV=1	Isocitrate dehydrogenase [NAD] subunit 2, mitochondrial	IDH2	9.61721	9.64172	9.16282	9.2441	9.62363	1.261	0.394	0.502	0.815633
P53228	Transaldolase NQM1 OS=Saccharomyces cerevisiae (strain ATCC 204508 / S288c) GN=NQM1 PE=1 SV=1	Transaldolase NQM1	NQM1	7.37945	7.27773	7.60662	7.54034	7.25756	1.26	0.395	0.502	0.815633
P10080	Single-stranded nucleic acid-binding protein OS=Saccharomyces cerevisiae (strain ATCC 204508 / S288c) GN=SBP1 PE=1 SV=2	Single-stranded nucleic acid-binding protein	SBP1	8.21014	8.32793	8.05192	7.94825	8.30876	1.258	0.395	0.502	0.815633
P00445	Superoxide dismutase [Cu-Zn] OS=Saccharomyces cerevisiae (strain ATCC 204508 / S288c) GN=SOD1 PE=1 SV=2	Superoxide dismutase [Cu-Zn]	SOD1	10.1412	10.1832	10.875	10.5214	9.94128	1.254	0.396	0.501	0.815633
P39958	Rab GDP-dissociation inhibitor OS=Saccharomyces cerevisiae (strain ATCC 204508 / S288c) GN=GDI1 PE=1 SV=1	Rab GDP-dissociation inhibitor	GDI1	5.86115	5.91261	5.55397	5.66797	5.98406	1.255	0.396	0.501	0.815633
P40150	Ribosome-associated molecular chaperone SSB2 OS=Saccharomyces cerevisiae (strain ATCC 204508 / S288c) GN=SSB2 PE=1 SV=2	Ribosome-associated molecular chaperone SSB2	SSB2	10.815	10.6214	10.7482	10.8494	10.5565	1.251	0.397	0.5	0.815633
P53252	Sphingolipid long chain base-responsive protein PIL1 OS=Saccharomyces cerevisiae (strain ATCC 204508 / S288c) GN=PIL1 PE=1 SV=1	Sphingolipid long chain base-responsive protein PIL1	PIL1	7.58236	7.69748	7.49827	7.31145	7.43849	1.251	0.398	0.5	0.815633
P33315	Transketolase 2 OS=Saccharomyces cerevisiae (strain ATCC 204508 / S288c) GN=TKL2 PE=1 SV=1	Transketolase 2	TKL2	6.5444	6.58891	6.89593	7.16069	6.40213	1.249	0.398	0.5	0.815633
A6ZZG0	Cell wall mannoprotein PIR1 OS=Saccharomyces cerevisiae (strain YJM789) GN=PIR1 PE=3 SV=1	Cell wall mannoprotein PIR1	PIR1	7.27366	7.1757	7.52017	7.43555	6.88367	1.25	0.398	0.5	0.815633
Q03195	Translation initiation factor RLI1 OS=Saccharomyces cerevisiae (strain ATCC 204508 / S288c) GN=RLI1 PE=1 SV=1	Translation initiation factor RLI1	RLI1	5.17149	5.25988	4.94486	5.04816	4.89756	1.245	0.399	0.499	0.815633
P04650	60S ribosomal protein L39 OS=Saccharomyces cerevisiae (strain ATCC 204508 / S288c) GN=RPL39 PE=1 SV=3	60S ribosomal protein L39	RPL39	5.90184	5.78543	6.48641	6.97917	5.75522	1.235	0.402	0.497	0.815633
P36421	Tyrosine--tRNA ligase, cytoplasmic OS=Saccharomyces cerevisiae (strain ATCC 204508 / S288c) GN=TYS1 PE=1 SV=3	Tyrosine--tRNA ligase, cytoplasmic	TYS1	8.79258	8.78148	8.40762	8.35514	8.76482	1.234	0.403	0.497	0.815633
P38013	Peroxiredoxin type-2 OS=Saccharomyces cerevisiae (strain ATCC 204508 / S288c) GN=AHP1 PE=1 SV=4	Peroxiredoxin type-2	AHP1	10.178	10.2387	9.86209	9.87409	10.1162	1.223	0.406	0.495	0.815633
Q02948	Vacuolar protein sorting-associated protein 30 OS=Saccharomyces cerevisiae (strain ATCC 204508 / S288c) GN=VPS30 PE=1 SV=1	Vacuolar protein sorting-associated protein 30	VPS30	5.99483	5.9825	5.52257	5.63129	5.95633	1.211	0.41	0.492	0.815633
P28834	Isocitrate dehydrogenase [NAD] subunit 1, mitochondrial OS=Saccharomyces cerevisiae (strain ATCC 204508 / S288c) GN=IDH1 PE=1 SV=2	Isocitrate dehydrogenase [NAD] subunit 1, mitochondrial	IDH1	8.90461	8.92725	9.12876	9.00836	8.75272	1.208	0.411	0.491	0.815633
P00549	Pyruvate kinase 1 OS=Saccharomyces cerevisiae (strain ATCC 204508 / S288c) GN=CDC19 PE=1 SV=2	Pyruvate kinase 1	CDC19	12.1417	12.0389	12.1779	12.0744	11.8403	1.201	0.413	0.49	0.815633
P49090	Asparagine synthetase [glutamine-hydrolyzing] 2 OS=Saccharomyces cerevisiae (strain ATCC 204508 / S288c) GN=ASN2 PE=1 SV=2	Asparagine synthetase [glutamine-hydrolyzing] 2	ASN2	6.42114	6.40552	6.15536	6.27907	6.43821	1.2	0.414	0.49	0.815633
P32471	Elongation factor 1-beta OS=Saccharomyces cerevisiae (strain ATCC 204508 / S288c) GN=EFB1 PE=1 SV=4	Elongation factor 1-beta	EFB1	8.01636	7.77874	8.00761	8.18363	7.71241	1.197	0.415	0.489	0.815633
Q12285	Ubiquitin-like protein MDY2 OS=Saccharomyces cerevisiae (strain ATCC 204508 / S288c) GN=MDY2 PE=1 SV=1	Ubiquitin-like protein MDY2	MDY2	5.47679	5.25652	6.04264	5.73146	5.32086	1.192	0.416	0.488	0.815633
P61830	Histone H3 OS=Saccharomyces cerevisiae (strain ATCC 204508 / S288c) GN=HHT1 PE=1 SV=2	Histone H3	HHT1	5.46377	5.22334	6.67469	6.85587	5.00581	1.193	0.416	0.488	0.815633
P34730	Protein BMH2 OS=Saccharomyces cerevisiae (strain ATCC 204508 / S288c) GN=BMH2 PE=1 SV=3	Protein BMH2	BMH2	5.37544	5.43392	6.41374	5.98415	5.62683	1.188	0.417	0.487	0.815633
P05743	60S ribosomal protein L26-A OS=Saccharomyces cerevisiae (strain ATCC 204508 / S288c) GN=RPL26A PE=1 SV=3	60S ribosomal protein L26-A	RPL26A	9.32067	9.33673	9.26086	9.55818	9.12548	1.181	0.42	0.486	0.815633
P37012	Phosphoglucomutase 2 OS=Saccharomyces cerevisiae (strain ATCC 204508 / S288c) GN=PGM2 PE=1 SV=1	Phosphoglucomutase 2	PGM2	9.55775	9.60335	9.46839	9.39682	9.49307	1.175	0.422	0.484	0.815633
P21242	Probable proteasome subunit alpha type-7 OS=Saccharomyces cerevisiae (strain ATCC 204508 / S288c) GN=PRE10 PE=1 SV=2	Probable proteasome subunit alpha type-7	PRE10	7.30657	7.40362	7.07197	7.12017	7.41838	1.172	0.423	0.484	0.815633
P17967	Protein disulfide-isomerase OS=Saccharomyces cerevisiae (strain ATCC 204508 / S288c) GN=PDI1 PE=1 SV=2	Protein disulfide-isomerase	PDI1	8.23165	8.20264	7.97628	7.80739	8.17393	1.17	0.424	0.483	0.815633
P46990	60S ribosomal protein L17-B OS=Saccharomyces cerevisiae (strain ATCC 204508 / S288c) GN=RPL17B PE=1 SV=2	60S ribosomal protein L17-B	RPL17B	5.58451	5.74217	5.94192	6.10199	5.57482	1.164	0.425	0.482	0.815633
P07278	cAMP-dependent protein kinase regulatory subunit OS=Saccharomyces cerevisiae (strain ATCC 204508 / S288c) GN=BCY1 PE=1 SV=4	cAMP-dependent protein kinase regulatory subunit	BCY1	5.7948	5.59871	5.48265	5.39325	5.77787	1.161	0.426	0.482	0.815633
P38841	Uncharacterized protein YHR138C OS=Saccharomyces cerevisiae (strain ATCC 204508 / S288c) GN=YHR138C PE=1 SV=1	Uncharacterized protein YHR138C	YHR138C	6.03874	6.06648	5.67965	5.53714	5.99926	1.159	0.427	0.481	0.815633
P07257	Cytochrome b-c1 complex subunit 2, mitochondrial OS=Saccharomyces cerevisiae (strain ATCC 204508 / S288c) GN=QCR2 PE=1 SV=1	Cytochrome b-c1 complex subunit 2, mitochondrial	QCR2	9.38957	9.42102	9.01174	9.11574	9.30614	1.158	0.428	0.481	0.815633
Q00955	Acetyl-CoA carboxylase OS=Saccharomyces cerevisiae (strain ATCC 204508 / S288c) GN=ACC1 PE=1 SV=2	Acetyl-CoA carboxylase	ACC1	10.0129	10.0435	9.6405	9.6961	9.94221	1.158	0.428	0.481	0.815633
P22803	Thioredoxin-2 OS=Saccharomyces cerevisiae (strain ATCC 204508 / S288c) GN=TRX2 PE=1 SV=3	Thioredoxin-2	TRX2	9.85026	9.83808	9.60117	9.6784	9.60346	1.156	0.428	0.48	0.815633
Q03973	High mobility group protein 1 OS=Saccharomyces cerevisiae (strain ATCC 204508 / S288c) GN=HMO1 PE=1 SV=1	High mobility group protein 1	HMO1	6.57496	6.49748	6.27565	6.31669	6.43021	1.147	0.431	0.478	0.815633
P32565	26S proteasome regulatory subunit RPN2 OS=Saccharomyces cerevisiae (strain ATCC 204508 / S288c) GN=RPN2 PE=1 SV=4	26S proteasome regulatory subunit RPN2	RPN2	8.38557	8.38219	7.97763	8.05922	8.34694	1.146	0.432	0.478	0.815633
P17255	V-type proton ATPase catalytic subunit A OS=Saccharomyces cerevisiae (strain ATCC 204508 / S288c) GN=VMA1 PE=1 SV=3	V-type proton ATPase catalytic subunit A	VMA1	10.2259	10.2773	9.99187	9.96781	10.0764	1.141	0.433	0.477	0.815633
P32316	Acetyl-CoA hydrolase OS=Saccharomyces cerevisiae (strain ATCC 204508 / S288c) GN=ACH1 PE=1 SV=2	Acetyl-CoA hydrolase	ACH1	9.54321	9.4741	9.29525	9.40325	9.37849	1.143	0.433	0.478	0.815633
P09064	Eukaryotic translation initiation factor 2 subunit beta OS=Saccharomyces cerevisiae (strain ATCC 204508 / S288c) GN=SUI3 PE=1 SV=2	Eukaryotic translation initiation factor 2 subunit beta	SUI3	6.78472	6.70901	6.38684	6.4372	6.6615	1.137	0.435	0.476	0.815633
P15019	Transaldolase OS=Saccharomyces cerevisiae (strain ATCC 204508 / S288c) GN=TAL1 PE=1 SV=4	Transaldolase	TAL1	9.11455	9.02659	9.47555	9.36332	8.88748	1.129	0.437	0.475	0.815633
P36059	ATP-dependent (S)-NAD(P)H-hydrate dehydratase OS=Saccharomyces cerevisiae (strain ATCC 204508 / S288c) GN=YKL151C PE=1 SV=1	ATP-dependent (S)-NAD(P)H-hydrate dehydratase	YKL151C	6.52979	6.69771	6.46268	6.66748	6.39498	1.13	0.437	0.475	0.815633
P00817	Inorganic pyrophosphatase OS=Saccharomyces cerevisiae (strain ATCC 204508 / S288c) GN=IPP1 PE=1 SV=4	Inorganic pyrophosphatase	IPP1	9.97586	10.0331	9.74221	9.57988	9.94975	1.126	0.438	0.474	0.815633
Q3E7Y3	40S ribosomal protein S22-B OS=Saccharomyces cerevisiae (strain ATCC 204508 / S288c) GN=RPS22B PE=1 SV=3	40S ribosomal protein S22-B	RPS22B	8.49655	8.26471	8.61276	8.93064	8.21505	1.127	0.438	0.474	0.815633
A6ZNU5	Ribose-5-phosphate isomerase OS=Saccharomyces cerevisiae (strain YJM789) GN=RKI1 PE=3 SV=1	Ribose-5-phosphate isomerase	RKI1	5.65897	5.53228	5.67143	5.55064	5.62286	1.129	0.438	0.475	0.815633
P49723	Ribonucleoside-diphosphate reductase small chain 2 OS=Saccharomyces cerevisiae (strain ATCC 204508 / S288c) GN=RNR4 PE=1 SV=1	Ribonucleoside-diphosphate reductase small chain 2	RNR4	10.0238	10.0569	9.75014	9.84605	9.86303	1.122	0.44	0.473	0.815633
Q03081	Transcriptional regulator MET31 OS=Saccharomyces cerevisiae (strain ATCC 204508 / S288c) GN=MET31 PE=1 SV=1	Transcriptional regulator MET31	MET31	6.86874	6.88577	6.47923	6.26028	6.9569	1.122	0.44	0.473	0.815633
P14306	Carboxypeptidase Y inhibitor OS=Saccharomyces cerevisiae (strain ATCC 204508 / S288c) GN=TFS1 PE=1 SV=2	Carboxypeptidase Y inhibitor	TFS1	7.02623	7.02461	6.67385	6.77065	6.8974	1.113	0.443	0.471	0.815633
P10507	Mitochondrial-processing peptidase subunit beta OS=Saccharomyces cerevisiae (strain ATCC 204508 / S288c) GN=MAS1 PE=1 SV=1	Mitochondrial-processing peptidase subunit beta	MAS1	6.24906	6.2588	5.93558	6.138	6.31321	1.11	0.444	0.47	0.815633
P10964	DNA-directed RNA polymerase I subunit RPA190 OS=Saccharomyces cerevisiae (strain ATCC 204508 / S288c) GN=RPA190 PE=1 SV=2	DNA-directed RNA polymerase I subunit RPA190	RPA190	6.59046	6.53108	6.14281	6.13716	6.41555	1.11	0.444	0.47	0.815633
Q12091	Damage response protein 1 OS=Saccharomyces cerevisiae (strain ATCC 204508 / S288c) GN=DAP1 PE=1 SV=1	Damage response protein 1	DAP1	4.66978	4.80058	4.62802	4.51378	4.82521	1.106	0.446	0.47	0.815633
P17076	60S ribosomal protein L8-A OS=Saccharomyces cerevisiae (strain ATCC 204508 / S288c) GN=RPL8A PE=1 SV=4	60S ribosomal protein L8-A	RPL8A	10.4673	10.4229	10.5629	10.4496	10.2876	1.101	0.447	0.468	0.815633
P02309	Histone H4 OS=Saccharomyces cerevisiae (strain ATCC 204508 / S288c) GN=HHF1 PE=1 SV=2	Histone H4	HHF1	6.66462	6.64148	7.00122	7.00263	6.4908	1.103	0.447	0.469	0.815633
P04037	Cytochrome c oxidase subunit 4, mitochondrial OS=Saccharomyces cerevisiae (strain ATCC 204508 / S288c) GN=COX4 PE=1 SV=1	Cytochrome c oxidase subunit 4, mitochondrial	COX4	6.41933	6.52277	6.24087	6.17612	6.67166	1.097	0.449	0.468	0.815633
P04456	60S ribosomal protein L25 OS=Saccharomyces cerevisiae (strain ATCC 204508 / S288c) GN=RPL25 PE=1 SV=4	60S ribosomal protein L25	RPL25	9.65868	9.75097	9.46836	9.50435	9.62057	1.087	0.452	0.465	0.815633
P02557	Tubulin beta chain OS=Saccharomyces cerevisiae (strain ATCC 204508 / S288c) GN=TUB2 PE=1 SV=2	Tubulin beta chain	TUB2	7.09824	7.14987	6.85359	6.93665	7.07506	1.085	0.453	0.465	0.815633
P40165	NAD(P)H-hydrate epimerase OS=Saccharomyces cerevisiae (strain ATCC 204508 / S288c) GN=YNL200C PE=1 SV=1	NAD(P)H-hydrate epimerase	YNL200C	5.17503	5.22616	4.88848	4.94492	5.46447	1.083	0.454	0.464	0.815633
P34216	EH domain-containing and endocytosis protein 1 OS=Saccharomyces cerevisiae (strain ATCC 204508 / S288c) GN=EDE1 PE=1 SV=2	EH domain-containing and endocytosis protein 1	EDE1	7.06128	7.03971	7.74525	7.00977	7.36336	1.083	0.454	0.464	0.815633
P54885	Gamma-glutamyl phosphate reductase OS=Saccharomyces cerevisiae (strain ATCC 204508 / S288c) GN=PRO2 PE=1 SV=1	Gamma-glutamyl phosphate reductase	PRO2	9.47534	9.46241	9.32945	9.51025	9.33016	1.08	0.455	0.464	0.815633
P01097	ATPase inhibitor, mitochondrial OS=Saccharomyces cerevisiae (strain ATCC 204508 / S288c) GN=INH1 PE=1 SV=2	ATPase inhibitor, mitochondrial	INH1	6.8825	6.81722	6.77758	6.49424	6.90798	1.08	0.455	0.464	0.815633
P00330	Alcohol dehydrogenase 1 OS=Saccharomyces cerevisiae (strain ATCC 204508 / S288c) GN=ADH1 PE=1 SV=5	Alcohol dehydrogenase 1	ADH1	11.5388	11.35	11.2352	11.3332	11.2867	1.073	0.458	0.462	0.815633
A6ZUM5	40S ribosomal protein S0-A OS=Saccharomyces cerevisiae (strain YJM789) GN=RPS0A PE=3 SV=1	40S ribosomal protein S0-A	RPS0A	5.93853	5.77767	6.32954	6.05901	5.64938	1.07	0.459	0.461	0.815633
P38934	Nuclear segregation protein BFR1 OS=Saccharomyces cerevisiae (strain ATCC 204508 / S288c) GN=BFR1 PE=1 SV=1	Nuclear segregation protein BFR1	BFR1	9.11258	9.13419	8.84232	8.78351	9.0462	1.068	0.46	0.461	0.815633
P05030	Plasma membrane ATPase 1 OS=Saccharomyces cerevisiae (strain ATCC 204508 / S288c) GN=PMA1 PE=1 SV=2	Plasma membrane ATPase 1	PMA1	8.04256	8.35248	8.23697	8.66315	8.261	1.064	0.461	0.46	0.815633
P06244	cAMP-dependent protein kinase type 1 OS=Saccharomyces cerevisiae (strain ATCC 204508 / S288c) GN=TPK1 PE=1 SV=3	cAMP-dependent protein kinase type 1	TPK1	8.25392	8.13967	8.24494	8.00494	8.10606	1.058	0.463	0.458	0.815633
P09436	Isoleucine--tRNA ligase, cytoplasmic OS=Saccharomyces cerevisiae (strain ATCC 204508 / S288c) GN=ILS1 PE=1 SV=1	Isoleucine--tRNA ligase, cytoplasmic	ILS1	8.88593	8.90082	8.59025	8.79651	8.85254	1.056	0.464	0.458	0.815633
Q06205	FK506-binding protein 4 OS=Saccharomyces cerevisiae (strain ATCC 204508 / S288c) GN=FPR4 PE=1 SV=1	FK506-binding protein 4	FPR4	4.9246	5.26729	5.02896	5.15587	5.17901	1.053	0.465	0.457	0.815633
P05737	60S ribosomal protein L7-A OS=Saccharomyces cerevisiae (strain ATCC 204508 / S288c) GN=RPL7A PE=1 SV=3	60S ribosomal protein L7-A	RPL7A	10.0338	10.0872	9.89627	9.95373	9.93676	1.047	0.467	0.456	0.815633
P50263	Protein SIP18 OS=Saccharomyces cerevisiae (strain ATCC 204508 / S288c) GN=SIP18 PE=1 SV=1	Protein SIP18	SIP18	6.69744	6.46159	8.39242	6.68306	6.62303	1.044	0.468	0.455	0.815633
P05740	60S ribosomal protein L17-A OS=Saccharomyces cerevisiae (strain ATCC 204508 / S288c) GN=RPL17A PE=1 SV=4	60S ribosomal protein L17-A	RPL17A	8.04308	8.02708	8.32871	8.31709	8.02707	1.044	0.469	0.455	0.815633
P04801	Threonine--tRNA ligase, cytoplasmic OS=Saccharomyces cerevisiae (strain ATCC 204508 / S288c) GN=THS1 PE=1 SV=2	Threonine--tRNA ligase, cytoplasmic	THS1	8.55211	8.58111	8.238	8.37842	8.51429	1.043	0.469	0.455	0.815633
P40185	Protein MMF1, mitochondrial OS=Saccharomyces cerevisiae (strain ATCC 204508 / S288c) GN=MMF1 PE=1 SV=1	Protein MMF1, mitochondrial	MMF1	3.54341	3.0887	3.66077	3.9653	2.80802	1.043	0.469	0.455	0.815633
P40693	Ribosome biogenesis protein RLP7 OS=Saccharomyces cerevisiae (strain ATCC 204508 / S288c) GN=RLP7 PE=1 SV=1	Ribosome biogenesis protein RLP7	RLP7	6.57946	6.57535	6.70603	6.42095	6.58456	1.042	0.469	0.455	0.815633
P04710	ADP,ATP carrier protein 1 OS=Saccharomyces cerevisiae (strain ATCC 204508 / S288c) GN=AAC1 PE=1 SV=1	ADP,ATP carrier protein 1	AAC1	6.7512	6.74202	7.35958	8.06569	6.60172	1.043	0.469	0.455	0.815633
Q01574	Acetyl-coenzyme A synthetase 1 OS=Saccharomyces cerevisiae (strain ATCC 204508 / S288c) GN=ACS1 PE=1 SV=2	Acetyl-coenzyme A synthetase 1	ACS1	9.63995	9.63111	9.50562	9.44589	9.50106	1.038	0.471	0.454	0.815633
P50094	Inosine-5'-monophosphate dehydrogenase 4 OS=Saccharomyces cerevisiae (strain ATCC 204508 / S288c) GN=IMD4 PE=1 SV=1	Inosine-5'-monophosphate dehydrogenase 4	IMD4	8.55573	8.54944	8.18236	8.17366	8.55318	1.038	0.471	0.454	0.815633
P21595	Cytochrome P450-DIT2 OS=Saccharomyces cerevisiae (strain ATCC 204508 / S288c) GN=DIT2 PE=1 SV=2	Cytochrome P450-DIT2	DIT2	8.00903	7.86657	7.40936	7.37868	8.03598	1.034	0.472	0.453	0.815633
P0CX25	60S ribosomal protein L43-A OS=Saccharomyces cerevisiae (strain ATCC 204508 / S288c) GN=RPL43A PE=1 SV=1	60S ribosomal protein L43-A	RPL43A	7.36504	7.47179	8.14969	8.1108	7.25172	1.03	0.474	0.452	0.815633
P50107	Lactoylglutathione lyase OS=Saccharomyces cerevisiae (strain ATCC 204508 / S288c) GN=GLO1 PE=1 SV=1	Lactoylglutathione lyase	GLO1	7.48175	7.47066	7.2612	7.05999	7.50208	1.031	0.474	0.452	0.815633
P15108	ATP-dependent molecular chaperone HSC82 OS=Saccharomyces cerevisiae (strain ATCC 204508 / S288c) GN=HSC82 PE=1 SV=4	ATP-dependent molecular chaperone HSC82	HSC82	5.32667	5.21501	5.0928	5.72223	5.2541	1.028	0.475	0.451	0.815633
P0CX46	60S ribosomal protein L2-B OS=Saccharomyces cerevisiae (strain ATCC 204508 / S288c) GN=RPL2B PE=1 SV=1	60S ribosomal protein L2-B	RPL2B	8.84024	8.92513	9.10579	9.1454	8.65319	1.027	0.475	0.451	0.815633
P15700	Uridylate kinase OS=Saccharomyces cerevisiae (strain ATCC 204508 / S288c) GN=URA6 PE=1 SV=1	Uridylate kinase	URA6	6.46608	6.59108	7.4203	8.03469	6.6346	1.023	0.476	0.45	0.815633
P04807	Hexokinase-2 OS=Saccharomyces cerevisiae (strain ATCC 204508 / S288c) GN=HXK2 PE=1 SV=4	Hexokinase-2	HXK2	8.69729	8.7376	8.45303	8.47808	8.58317	1.021	0.477	0.45	0.815633
P38910	10 kDa heat shock protein, mitochondrial OS=Saccharomyces cerevisiae (strain ATCC 204508 / S288c) GN=HSP10 PE=1 SV=1	10 kDa heat shock protein, mitochondrial	HSP10	8.69066	8.7075	8.523	8.63935	8.51646	1.019	0.478	0.449	0.815633
Q03048	Cofilin OS=Saccharomyces cerevisiae (strain ATCC 204508 / S288c) GN=COF1 PE=1 SV=1	Cofilin	COF1	8.2645	8.23353	8.04769	8.35143	8.00671	1.015	0.48	0.448	0.815633
Q08971	Protein PBDC1 homolog OS=Saccharomyces cerevisiae (strain ATCC 204508 / S288c) GN=YPL225W PE=1 SV=1	Protein PBDC1 homolog	YPL225W	7.83365	7.86176	7.8582	8.04871	7.75815	1.011	0.481	0.447	0.815633
P39939	40S ribosomal protein S26-B OS=Saccharomyces cerevisiae (strain ATCC 204508 / S288c) GN=RPS26B PE=1 SV=1	40S ribosomal protein S26-B	RPS26B	6.41819	6.27373	6.70693	6.35401	6.25715	1.01	0.482	0.447	0.815633
P00899	Anthranilate synthase component 1 OS=Saccharomyces cerevisiae (strain ATCC 204508 / S288c) GN=TRP2 PE=1 SV=4	Anthranilate synthase component 1	TRP2	7.25964	7.17705	7.12572	6.98357	7.17246	1.01	0.482	0.447	0.815633
P17891	Clathrin light chain OS=Saccharomyces cerevisiae (strain ATCC 204508 / S288c) GN=CLC1 PE=1 SV=1	Clathrin light chain	CLC1	5.24139	5.18936	5.02858	5.28685	5.23395	1.009	0.482	0.447	0.815633
Q00055	Glycerol-3-phosphate dehydrogenase [NAD(+)] 1 OS=Saccharomyces cerevisiae (strain ATCC 204508 / S288c) GN=GPD1 PE=1 SV=4	Glycerol-3-phosphate dehydrogenase [NAD(+)] 1	GPD1	8.30011	8.21875	8.91163	8.84055	8.11323	1.006	0.483	0.446	0.815633
P32614	Fumarate reductase 1 OS=Saccharomyces cerevisiae (strain ATCC 204508 / S288c) GN=FRD1 PE=1 SV=1	Fumarate reductase 1	FRD1	7.83905	7.8316	8.02244	7.98208	7.72462	1.003	0.485	0.445	0.815633
P32473	Pyruvate dehydrogenase E1 component subunit beta, mitochondrial OS=Saccharomyces cerevisiae (strain ATCC 204508 / S288c) GN=PDB1 PE=1 SV=2	Pyruvate dehydrogenase E1 component subunit beta, mitochondrial	PDB1	7.80326	7.96022	7.55779	7.53988	7.89783	0.994	0.488	0.443	0.815633
Q07551	NADPH-dependent alpha-keto amide reductase OS=Saccharomyces cerevisiae (strain ATCC 204508 / S288c) GN=YDL124W PE=1 SV=1	NADPH-dependent alpha-keto amide reductase	YDL124W	8.58632	8.60149	8.4191	8.32383	8.63723	0.991	0.489	0.442	0.815633
Q12305	Thiosulfate sulfurtransferase RDL1, mitochondrial OS=Saccharomyces cerevisiae (strain ATCC 204508 / S288c) GN=RDL1 PE=1 SV=1	Thiosulfate sulfurtransferase RDL1, mitochondrial	RDL1	7.00207	7.19713	6.85125	6.88184	7.10112	0.992	0.489	0.442	0.815633
P36010	Nucleoside diphosphate kinase OS=Saccharomyces cerevisiae (strain ATCC 204508 / S288c) GN=YNK1 PE=1 SV=1	Nucleoside diphosphate kinase	YNK1	9.47544	9.44401	9.58172	9.83069	8.91639	0.988	0.49	0.441	0.815633
P05453	Eukaryotic peptide chain release factor GTP-binding subunit OS=Saccharomyces cerevisiae (strain ATCC 204508 / S288c) GN=SUP35 PE=1 SV=1	Eukaryotic peptide chain release factor GTP-binding subunit	SUP35	7.01965	6.9914	6.85104	7.17249	6.84641	0.988	0.49	0.441	0.815633
P22515	Ubiquitin-activating enzyme E1 1 OS=Saccharomyces cerevisiae (strain ATCC 204508 / S288c) GN=UBA1 PE=1 SV=2	Ubiquitin-activating enzyme E1 1	UBA1	9.30501	9.25693	8.93586	8.88426	9.21879	0.988	0.491	0.441	0.815633
P00427	Cytochrome c oxidase subunit 6, mitochondrial OS=Saccharomyces cerevisiae (strain ATCC 204508 / S288c) GN=COX6 PE=1 SV=1	Cytochrome c oxidase subunit 6, mitochondrial	COX6	6.54025	6.35207	6.75879	6.50097	6.5401	0.981	0.493	0.44	0.815633
P81450	ATP synthase subunit J, mitochondrial OS=Saccharomyces cerevisiae (strain ATCC 204508 / S288c) GN=ATP18 PE=1 SV=1	ATP synthase subunit J, mitochondrial	ATP18	7.18933	7.22569	7.13755	7.54384	7.24889	0.981	0.493	0.44	0.815633
Q04792	Glutamate decarboxylase OS=Saccharomyces cerevisiae (strain ATCC 204508 / S288c) GN=GAD1 PE=1 SV=1	Glutamate decarboxylase	GAD1	3.53964	3.86499	3.74596	3.94359	3.90842	0.969	0.498	0.437	0.815633
P07245	C-1-tetrahydrofolate synthase, cytoplasmic OS=Saccharomyces cerevisiae (strain ATCC 204508 / S288c) GN=ADE3 PE=1 SV=1	C-1-tetrahydrofolate synthase, cytoplasmic	ADE3	9.01754	8.92254	8.70945	8.84583	8.91544	0.967	0.499	0.436	0.815633
P0CX39	40S ribosomal protein S8-A OS=Saccharomyces cerevisiae (strain ATCC 204508 / S288c) GN=RPS8A PE=1 SV=1	40S ribosomal protein S8-A	RPS8A	9.21145	9.30387	8.85617	8.84247	9.21719	0.961	0.502	0.435	0.815633
P14120	60S ribosomal protein L30 OS=Saccharomyces cerevisiae (strain ATCC 204508 / S288c) GN=RPL30 PE=1 SV=3	60S ribosomal protein L30	RPL30	5.65246	5.42215	6.15406	6.63263	5.47429	0.957	0.503	0.434	0.815633
P38067	Succinate-semialdehyde dehydrogenase [NADP(+)] OS=Saccharomyces cerevisiae (strain ATCC 204508 / S288c) GN=UGA2 PE=1 SV=2	Succinate-semialdehyde dehydrogenase [NADP(+)]	UGA2	5.21904	5.05986	5.05327	5.09902	5.431	0.958	0.503	0.434	0.815633
P33399	La protein homolog OS=Saccharomyces cerevisiae (strain ATCC 204508 / S288c) GN=LHP1 PE=1 SV=2	La protein homolog	LHP1	6.34152	6.16937	6.02389	5.90294	6.35561	0.957	0.503	0.434	0.815633
P48836	V-type proton ATPase subunit G OS=Saccharomyces cerevisiae (strain ATCC 204508 / S288c) GN=VMA10 PE=1 SV=1	V-type proton ATPase subunit G	VMA10	7.08784	6.92663	7.1651	6.84908	6.92941	0.951	0.505	0.432	0.815633
P15454	Guanylate kinase OS=Saccharomyces cerevisiae (strain ATCC 204508 / S288c) GN=GUK1 PE=1 SV=2	Guanylate kinase	GUK1	6.25354	6.47846	6.55971	6.38842	6.34063	0.953	0.505	0.433	0.815633
P51401	60S ribosomal protein L9-B OS=Saccharomyces cerevisiae (strain ATCC 204508 / S288c) GN=RPL9B PE=1 SV=1	60S ribosomal protein L9-B	RPL9B	6.31286	6.12955	5.88494	6.10988	6.03787	0.948	0.507	0.431	0.815633
P38999	Saccharopine dehydrogenase [NADP(+), L-glutamate-forming] OS=Saccharomyces cerevisiae (strain ATCC 204508 / S288c) GN=LYS9 PE=1 SV=1	Saccharopine dehydrogenase [NADP(+), L-glutamate-forming]	LYS9	6.99528	6.95456	6.5071	6.68397	6.919	0.945	0.508	0.431	0.815633
Q01477	Ubiquitin carboxyl-terminal hydrolase 3 OS=Saccharomyces cerevisiae (strain ATCC 204508 / S288c) GN=UBP3 PE=1 SV=1	Ubiquitin carboxyl-terminal hydrolase 3	UBP3	4.51099	4.64589	4.53022	4.62326	4.78982	0.94	0.51	0.429	0.815633
Q3E754	40S ribosomal protein S21-B OS=Saccharomyces cerevisiae (strain ATCC 204508 / S288c) GN=RPS21B PE=1 SV=1	40S ribosomal protein S21-B	RPS21B	6.7965	6.94744	7.79388	7.94133	6.6318	0.939	0.511	0.429	0.815633
P05750	40S ribosomal protein S3 OS=Saccharomyces cerevisiae (strain ATCC 204508 / S288c) GN=RPS3 PE=1 SV=5	40S ribosomal protein S3	RPS3	9.69419	9.62648	9.52587	9.74137	9.52355	0.936	0.512	0.428	0.815633
P38431	Eukaryotic translation initiation factor 5 OS=Saccharomyces cerevisiae (strain ATCC 204508 / S288c) GN=TIF5 PE=1 SV=1	Eukaryotic translation initiation factor 5	TIF5	4.251	4.74679	4.37731	4.4334	4.41927	0.936	0.512	0.428	0.815633
P0CX56	40S ribosomal protein S18-B OS=Saccharomyces cerevisiae (strain ATCC 204508 / S288c) GN=RPS18B PE=1 SV=1	40S ribosomal protein S18-B	RPS18B	9.14567	9.135	9.20147	9.32505	8.98412	0.934	0.513	0.428	0.815633
P28777	Chorismate synthase OS=Saccharomyces cerevisiae (strain ATCC 204508 / S288c) GN=ARO2 PE=1 SV=1	Chorismate synthase	ARO2	8.39846	8.44499	8.12317	8.06057	8.3291	0.933	0.513	0.427	0.815633
Q12513	Translation machinery-associated protein 17 OS=Saccharomyces cerevisiae (strain ATCC 204508 / S288c) GN=TMA17 PE=1 SV=1	Translation machinery-associated protein 17	TMA17	5.02692	4.91459	4.98674	5.11379	4.83469	0.931	0.514	0.427	0.815633
P27796	3-ketoacyl-CoA thiolase, peroxisomal OS=Saccharomyces cerevisiae (strain ATCC 204508 / S288c) GN=POT1 PE=1 SV=1	3-ketoacyl-CoA thiolase, peroxisomal	POT1	5.95935	5.92501	5.98095	6.20046	5.76661	0.932	0.514	0.427	0.815633
P48589	40S ribosomal protein S12 OS=Saccharomyces cerevisiae (strain ATCC 204508 / S288c) GN=RPS12 PE=1 SV=1	40S ribosomal protein S12	RPS12	6.73025	6.58347	6.81595	6.75186	6.53049	0.929	0.515	0.426	0.815633
Q07653	Protein HBT1 OS=Saccharomyces cerevisiae (strain ATCC 204508 / S288c) GN=HBT1 PE=1 SV=1	Protein HBT1	HBT1	7.54374	7.61933	7.49784	7.3034	7.59656	0.926	0.516	0.426	0.815633
P04046	Amidophosphoribosyltransferase OS=Saccharomyces cerevisiae (strain ATCC 204508 / S288c) GN=ADE4 PE=1 SV=2	Amidophosphoribosyltransferase	ADE4	5.61206	5.83976	5.85469	5.7939	5.6906	0.926	0.516	0.426	0.815633
P39676	Flavohemoprotein OS=Saccharomyces cerevisiae (strain ATCC 204508 / S288c) GN=YHB1 PE=1 SV=2	Flavohemoprotein	YHB1	7.35131	7.50428	7.31456	7.15681	7.41548	0.923	0.517	0.425	0.815633
P38230	Probable quinone oxidoreductase OS=Saccharomyces cerevisiae (strain ATCC 204508 / S288c) GN=ZTA1 PE=1 SV=1	Probable quinone oxidoreductase	ZTA1	5.05149	4.96055	4.70678	4.61457	4.98007	0.925	0.517	0.425	0.815633
P46784	40S ribosomal protein S10-B OS=Saccharomyces cerevisiae (strain ATCC 204508 / S288c) GN=RPS10B PE=1 SV=1	40S ribosomal protein S10-B	RPS10B	8.03841	7.98291	8.71373	7.94478	8.65909	0.922	0.518	0.425	0.815633
P38764	26S proteasome regulatory subunit RPN1 OS=Saccharomyces cerevisiae (strain ATCC 204508 / S288c) GN=RPN1 PE=1 SV=3	26S proteasome regulatory subunit RPN1	RPN1	5.76499	6.15486	6.03889	5.8447	5.98284	0.922	0.518	0.425	0.815633
P00830	ATP synthase subunit beta, mitochondrial OS=Saccharomyces cerevisiae (strain ATCC 204508 / S288c) GN=ATP2 PE=1 SV=2	ATP synthase subunit beta, mitochondrial	ATP2	9.65553	9.73175	9.50931	9.63264	9.57981	0.919	0.519	0.424	0.815633
Q05788	Purine nucleoside phosphorylase OS=Saccharomyces cerevisiae (strain ATCC 204508 / S288c) GN=PNP1 PE=1 SV=1	Purine nucleoside phosphorylase	PNP1	4.90541	5.19869	4.86788	5.05757	4.88982	0.905	0.525	0.42	0.815633
Q06625	Glycogen debranching enzyme OS=Saccharomyces cerevisiae (strain ATCC 204508 / S288c) GN=GDB1 PE=1 SV=1	Glycogen debranching enzyme	GDB1	7.05188	7.17874	6.78915	7.01498	7.08379	0.902	0.527	0.419	0.815633
P33327	NAD-specific glutamate dehydrogenase OS=Saccharomyces cerevisiae (strain ATCC 204508 / S288c) GN=GDH2 PE=1 SV=1	NAD-specific glutamate dehydrogenase	GDH2	5.98203	5.7018	5.90799	6.27588	5.7941	0.898	0.528	0.418	0.815633
Q99337	Transposon Ty1-NL2 Gag-Pol polyprotein OS=Saccharomyces cerevisiae (strain ATCC 204508 / S288c) GN=TY1B-NL2 PE=3 SV=1	Transposon Ty1-NL2 Gag-Pol polyprotein	TY1B-NL2	5.62288	5.50655	5.88561	5.77164	5.8636	0.89	0.532	0.416	0.815633
P38071	Enoyl-[acyl-carrier protein] reductase [NADPH, B-specific], mitochondrial OS=Saccharomyces cerevisiae (strain ATCC 204508 / S288c) GN=ETR1 PE=1 SV=3	Enoyl-[acyl-carrier protein] reductase [NADPH, B-specific], mitochondrial	ETR1	8.3605	8.41822	7.90418	7.89162	8.27686	0.89	0.532	0.416	0.815633
Q12074	Spermidine synthase OS=Saccharomyces cerevisiae (strain ATCC 204508 / S288c) GN=SPE3 PE=1 SV=1	Spermidine synthase	SPE3	7.44019	7.40308	7.51789	7.71992	7.23917	0.886	0.534	0.415	0.815633
Q01939	26S protease regulatory subunit 8 homolog OS=Saccharomyces cerevisiae (strain ATCC 204508 / S288c) GN=RPT6 PE=1 SV=4	26S protease regulatory subunit 8 homolog	RPT6	6.96839	6.95487	6.88087	6.84289	6.79123	0.885	0.534	0.415	0.815633
P10592	Heat shock protein SSA2 OS=Saccharomyces cerevisiae (strain ATCC 204508 / S288c) GN=SSA2 PE=1 SV=3	Heat shock protein SSA2	SSA2	9.64642	9.74682	9.48425	9.36299	9.70381	0.883	0.535	0.414	0.815633
P14832	Peptidyl-prolyl cis-trans isomerase OS=Saccharomyces cerevisiae (strain ATCC 204508 / S288c) GN=CPR1 PE=1 SV=3	Peptidyl-prolyl cis-trans isomerase	CPR1	10.3317	10.1154	10.1009	10.2313	10.0745	0.884	0.535	0.414	0.815633
P06105	Protein SCP160 OS=Saccharomyces cerevisiae (strain ATCC 204508 / S288c) GN=SCP160 PE=1 SV=3	Protein SCP160	SCP160	8.49341	8.56093	8.19368	8.19964	8.52107	0.878	0.537	0.412	0.815633
P28272	Dihydroorotate dehydrogenase (fumarate) OS=Saccharomyces cerevisiae (strain ATCC 204508 / S288c) GN=URA1 PE=1 SV=1	Dihydroorotate dehydrogenase (fumarate)	URA1	7.87984	7.89876	7.57663	7.75746	7.94857	0.875	0.538	0.412	0.815633
Q02326	60S ribosomal protein L6-A OS=Saccharomyces cerevisiae (strain ATCC 204508 / S288c) GN=RPL6A PE=1 SV=2	60S ribosomal protein L6-A	RPL6A	5.53409	5.57189	5.20193	5.39671	5.42622	0.874	0.539	0.411	0.815633
P0CX28	60S ribosomal protein L42-B OS=Saccharomyces cerevisiae (strain ATCC 204508 / S288c) GN=RPL42B PE=1 SV=1	60S ribosomal protein L42-B	RPL42B	7.07428	7.06687	7.93163	7.48544	7.31241	0.872	0.54	0.411	0.815633
P23301	Eukaryotic translation initiation factor 5A-1 OS=Saccharomyces cerevisiae (strain ATCC 204508 / S288c) GN=HYP2 PE=1 SV=3	Eukaryotic translation initiation factor 5A-1	HYP2	10.1302	10.1272	9.83259	9.92504	10.0717	0.865	0.543	0.409	0.815633
P38624	Proteasome subunit beta type-1 OS=Saccharomyces cerevisiae (strain ATCC 204508 / S288c) GN=PRE3 PE=1 SV=2	Proteasome subunit beta type-1	PRE3	6.91502	7.13633	7.04061	6.97115	7.04794	0.862	0.544	0.408	0.815633
P05319	60S acidic ribosomal protein P2-alpha OS=Saccharomyces cerevisiae (strain ATCC 204508 / S288c) GN=RPP2A PE=1 SV=1	60S acidic ribosomal protein P2-alpha	RPP2A	8.16025	8.43536	8.33559	8.3034	8.06585	0.859	0.546	0.407	0.815633
P00890	Citrate synthase, mitochondrial OS=Saccharomyces cerevisiae (strain ATCC 204508 / S288c) GN=CIT1 PE=1 SV=2	Citrate synthase, mitochondrial	CIT1	9.25594	9.26467	9.30103	9.38915	9.03445	0.855	0.548	0.406	0.815633
P00950	Phosphoglycerate mutase 1 OS=Saccharomyces cerevisiae (strain ATCC 204508 / S288c) GN=GPM1 PE=1 SV=3	Phosphoglycerate mutase 1	GPM1	9.2793	9.29347	9.7076	9.72636	9.19795	0.855	0.548	0.406	0.815633
P31688	Trehalose-phosphatase OS=Saccharomyces cerevisiae (strain ATCC 204508 / S288c) GN=TPS2 PE=1 SV=3	Trehalose-phosphatase	TPS2	8.97836	8.86712	8.5769	8.74745	8.88495	0.855	0.548	0.406	0.815633
P11154	Pyruvate carboxylase 1 OS=Saccharomyces cerevisiae (strain ATCC 204508 / S288c) GN=PYC1 PE=1 SV=2	Pyruvate carboxylase 1	PYC1	8.02183	8.05203	7.88484	7.88426	7.99753	0.852	0.549	0.405	0.815633
P10869	Aspartokinase OS=Saccharomyces cerevisiae (strain ATCC 204508 / S288c) GN=HOM3 PE=1 SV=2	Aspartokinase	HOM3	5.89443	5.99947	5.5776	5.6159	5.86935	0.853	0.549	0.406	0.815633
P05756	40S ribosomal protein S13 OS=Saccharomyces cerevisiae (strain ATCC 204508 / S288c) GN=RPS13 PE=1 SV=3	40S ribosomal protein S13	RPS13	8.40222	8.46831	8.7162	8.95906	8.22025	0.85	0.55	0.405	0.815633
P34227	Mitochondrial peroxiredoxin PRX1 OS=Saccharomyces cerevisiae (strain ATCC 204508 / S288c) GN=PRX1 PE=1 SV=1	Mitochondrial peroxiredoxin PRX1	PRX1	7.21118	7.20325	7.10986	7.34512	7.20452	0.849	0.551	0.404	0.815633
Q06336	ADP-ribosylation factor-binding protein GGA1 OS=Saccharomyces cerevisiae (strain ATCC 204508 / S288c) GN=GGA1 PE=1 SV=1	ADP-ribosylation factor-binding protein GGA1	GGA1	6.69092	6.51695	6.44971	6.54985	6.68078	0.849	0.551	0.404	0.815633
P08417	Fumarate hydratase, mitochondrial OS=Saccharomyces cerevisiae (strain ATCC 204508 / S288c) GN=FUM1 PE=1 SV=2	Fumarate hydratase, mitochondrial	FUM1	8.00796	8.13424	8.4638	8.50369	8.06092	0.842	0.553	0.403	0.815633
P37291	Serine hydroxymethyltransferase, cytosolic OS=Saccharomyces cerevisiae (strain ATCC 204508 / S288c) GN=SHM2 PE=1 SV=2	Serine hydroxymethyltransferase, cytosolic	SHM2	8.98425	9.06141	8.97788	8.94526	8.88185	0.839	0.555	0.402	0.815633
P39683	Nicotinate phosphoribosyltransferase OS=Saccharomyces cerevisiae (strain ATCC 204508 / S288c) GN=NPT1 PE=1 SV=3	Nicotinate phosphoribosyltransferase	NPT1	7.74739	7.59818	7.28485	7.28216	7.52062	0.839	0.555	0.402	0.815633
P53958	Protein BOP3 OS=Saccharomyces cerevisiae (strain ATCC 204508 / S288c) GN=BOP3 PE=1 SV=1	Protein BOP3	BOP3	7.10344	7.12182	6.54568	6.56592	7.09019	0.838	0.555	0.401	0.815633
A5Z2X5	UPF0495 protein YPR010C-A OS=Saccharomyces cerevisiae (strain ATCC 204508 / S288c) GN=YPR010C-A PE=3 SV=1	UPF0495 protein YPR010C-A	YPR010C-A	5.08915	5.27109	4.98742	5.24327	5.02784	0.835	0.557	0.4	0.815633
P0CX43	60S ribosomal protein L1-A OS=Saccharomyces cerevisiae (strain ATCC 204508 / S288c) GN=RPL1A PE=1 SV=1	60S ribosomal protein L1-A	RPL1A	9.25844	9.15448	9.3611	9.59634	9.13913	0.834	0.558	0.4	0.815633
P18239	ADP,ATP carrier protein 2 OS=Saccharomyces cerevisiae (strain ATCC 204508 / S288c) GN=PET9 PE=1 SV=2	ADP,ATP carrier protein 2	PET9	9.58932	9.6996	9.51611	9.78792	9.62637	0.826	0.561	0.398	0.815633
P53981	Uncharacterized phosphatase YNL010W OS=Saccharomyces cerevisiae (strain ATCC 204508 / S288c) GN=YNL010W PE=1 SV=1	Uncharacterized phosphatase YNL010W	YNL010W	7.168	7.20248	7.16305	7.19541	7.09054	0.827	0.561	0.398	0.815633
P50095	Inosine-5'-monophosphate dehydrogenase 3 OS=Saccharomyces cerevisiae (strain ATCC 204508 / S288c) GN=IMD3 PE=1 SV=1	Inosine-5'-monophosphate dehydrogenase 3	IMD3	7.52321	7.52809	7.19973	7.18364	7.45769	0.825	0.562	0.398	0.815633
Q07478	ATP-dependent RNA helicase SUB2 OS=Saccharomyces cerevisiae (strain ATCC 204508 / S288c) GN=SUB2 PE=1 SV=1	ATP-dependent RNA helicase SUB2	SUB2	7.23239	7.17328	7.47536	7.57532	7.20792	0.824	0.562	0.397	0.815633
P39954	Adenosylhomocysteinase OS=Saccharomyces cerevisiae (strain ATCC 204508 / S288c) GN=SAH1 PE=1 SV=1	Adenosylhomocysteinase	SAH1	9.82728	9.8095	9.62739	9.6896	9.74427	0.822	0.563	0.397	0.815633
P07991	Ornithine aminotransferase OS=Saccharomyces cerevisiae (strain ATCC 204508 / S288c) GN=CAR2 PE=1 SV=2	Ornithine aminotransferase	CAR2	6.816	6.8798	6.97934	7.02936	6.85594	0.821	0.563	0.396	0.815633
P53141	Myosin light chain 1 OS=Saccharomyces cerevisiae (strain ATCC 204508 / S288c) GN=MLC1 PE=1 SV=1	Myosin light chain 1	MLC1	7.73536	7.82327	7.68727	7.68873	7.6433	0.822	0.563	0.397	0.815633
P33330	Phosphoserine aminotransferase OS=Saccharomyces cerevisiae (strain ATCC 204508 / S288c) GN=SER1 PE=1 SV=1	Phosphoserine aminotransferase	SER1	5.7155	6.03606	5.7347	5.63304	5.89745	0.821	0.564	0.396	0.815633
P07267	Saccharopepsin OS=Saccharomyces cerevisiae (strain ATCC 204508 / S288c) GN=PEP4 PE=1 SV=1	Saccharopepsin	PEP4	7.11673	7.14394	7.5164	7.65139	7.175	0.815	0.566	0.395	0.815633
Q12306	Ubiquitin-like protein SMT3 OS=Saccharomyces cerevisiae (strain ATCC 204508 / S288c) GN=SMT3 PE=1 SV=1	Ubiquitin-like protein SMT3	SMT3	6.22834	6.02384	7.24611	7.58007	6.00824	0.816	0.566	0.395	0.815633
P25694	Cell division control protein 48 OS=Saccharomyces cerevisiae (strain ATCC 204508 / S288c) GN=CDC48 PE=1 SV=3	Cell division control protein 48	CDC48	8.64261	8.65353	8.38968	8.45413	8.61287	0.813	0.567	0.394	0.815633
Q04344	Hit family protein 1 OS=Saccharomyces cerevisiae (strain ATCC 204508 / S288c) GN=HNT1 PE=1 SV=2	Hit family protein 1	HNT1	7.40587	7.67935	7.18852	7.21333	7.32079	0.812	0.568	0.394	0.815633
P39079	T-complex protein 1 subunit zeta OS=Saccharomyces cerevisiae (strain ATCC 204508 / S288c) GN=CCT6 PE=1 SV=1	T-complex protein 1 subunit zeta	CCT6	6.49009	6.58673	6.27085	6.29328	6.56755	0.81	0.569	0.393	0.815633
P53978	Elongation factor 3B OS=Saccharomyces cerevisiae (strain ATCC 204508 / S288c) GN=HEF3 PE=1 SV=2	Elongation factor 3B	HEF3	6.11546	5.92484	5.78248	5.94522	5.76429	0.806	0.571	0.392	0.815633
P32074	Coatomer subunit gamma OS=Saccharomyces cerevisiae (strain ATCC 204508 / S288c) GN=SEC21 PE=1 SV=2	Coatomer subunit gamma	SEC21	6.35915	6.31351	6.38589	6.44673	6.19692	0.803	0.572	0.391	0.815633
P38707	Asparagine--tRNA ligase, cytoplasmic OS=Saccharomyces cerevisiae (strain ATCC 204508 / S288c) GN=DED81 PE=1 SV=1	Asparagine--tRNA ligase, cytoplasmic	DED81	9.21289	9.21217	9.03369	8.99196	9.14695	0.801	0.573	0.391	0.815633
Q12680	Glutamate synthase [NADH] OS=Saccharomyces cerevisiae (strain ATCC 204508 / S288c) GN=GLT1 PE=1 SV=2	Glutamate synthase [NADH]	GLT1	6.03945	6.00167	5.72433	5.98914	6.08255	0.8	0.573	0.39	0.815633
P17709	Glucokinase-1 OS=Saccharomyces cerevisiae (strain ATCC 204508 / S288c) GN=GLK1 PE=1 SV=1	Glucokinase-1	GLK1	7.29865	7.34915	7.6152	7.49414	7.63344	0.799	0.574	0.39	0.815633
P53202	Cullin-3 OS=Saccharomyces cerevisiae (strain ATCC 204508 / S288c) GN=CUL3 PE=1 SV=1	Cullin-3	CUL3	5.6896	5.65627	5.83637	6.27516	5.55719	0.799	0.574	0.39	0.815633
P46672	tRNA-aminoacylation cofactor ARC1 OS=Saccharomyces cerevisiae (strain ATCC 204508 / S288c) GN=ARC1 PE=1 SV=2	tRNA-aminoacylation cofactor ARC1	ARC1	9.4569	9.48239	9.19614	9.20194	9.30465	0.792	0.577	0.388	0.815633
P33416	Heat shock protein 78, mitochondrial OS=Saccharomyces cerevisiae (strain ATCC 204508 / S288c) GN=HSP78 PE=1 SV=2	Heat shock protein 78, mitochondrial	HSP78	5.9393	5.85196	5.74109	5.85611	5.82272	0.794	0.577	0.388	0.815633
P36047	Protein phosphatase 1 regulatory subunit SDS22 OS=Saccharomyces cerevisiae (strain ATCC 204508 / S288c) GN=SDS22 PE=1 SV=1	Protein phosphatase 1 regulatory subunit SDS22	SDS22	4.70747	5.01058	4.78825	4.58824	4.87912	0.788	0.579	0.387	0.815633
P53278	Uncharacterized protein YGR130C OS=Saccharomyces cerevisiae (strain ATCC 204508 / S288c) GN=YGR130C PE=1 SV=1	Uncharacterized protein YGR130C	YGR130C	6.28885	6.23916	6.44316	6.22419	6.53459	0.789	0.579	0.387	0.815633
P05755	40S ribosomal protein S9-B OS=Saccharomyces cerevisiae (strain ATCC 204508 / S288c) GN=RPS9B PE=1 SV=4	40S ribosomal protein S9-B	RPS9B	9.44667	9.48524	9.43883	9.60588	9.31933	0.785	0.581	0.386	0.815633
P89886	Translation machinery-associated protein 20 OS=Saccharomyces cerevisiae (strain ATCC 204508 / S288c) GN=TMA20 PE=1 SV=1	Translation machinery-associated protein 20	TMA20	7.06302	7.06685	6.71685	6.75871	6.88025	0.784	0.581	0.386	0.815633
P36037	Protein DOA1 OS=Saccharomyces cerevisiae (strain ATCC 204508 / S288c) GN=DOA1 PE=1 SV=1	Protein DOA1	DOA1	4.3092	4.01268	4.0192	4.15494	3.96231	0.784	0.581	0.386	0.815633
P16120	Threonine synthase OS=Saccharomyces cerevisiae (strain ATCC 204508 / S288c) GN=THR4 PE=1 SV=1	Threonine synthase	THR4	7.19966	7.23767	7.37235	7.11093	7.51743	0.781	0.583	0.385	0.815633
P38137	Peroxisomal-coenzyme A synthetase OS=Saccharomyces cerevisiae (strain ATCC 204508 / S288c) GN=PCS60 PE=1 SV=1	Peroxisomal-coenzyme A synthetase	PCS60	5.0819	5.39886	5.13911	5.15936	5.21991	0.781	0.583	0.384	0.815633
P06738	Glycogen phosphorylase OS=Saccharomyces cerevisiae (strain ATCC 204508 / S288c) GN=GPH1 PE=1 SV=4	Glycogen phosphorylase	GPH1	5.47054	5.55798	5.60526	5.46942	5.39486	0.779	0.584	0.384	0.815633
P40459	Pantoate--beta-alanine ligase OS=Saccharomyces cerevisiae (strain ATCC 204508 / S288c) GN=PAN6 PE=1 SV=2	Pantoate--beta-alanine ligase	PAN6	6.2172	6.55297	6.49831	6.55019	6.37704	0.778	0.585	0.383	0.815633
P32191	Glycerol-3-phosphate dehydrogenase, mitochondrial OS=Saccharomyces cerevisiae (strain ATCC 204508 / S288c) GN=GUT2 PE=1 SV=2	Glycerol-3-phosphate dehydrogenase, mitochondrial	GUT2	7.88855	7.88396	7.64116	7.83267	7.91029	0.77	0.588	0.381	0.815633
P29311	Protein BMH1 OS=Saccharomyces cerevisiae (strain ATCC 204508 / S288c) GN=BMH1 PE=1 SV=4	Protein BMH1	BMH1	9.69695	9.57013	10.1772	10.1108	9.51955	0.765	0.591	0.38	0.815633
P12612	T-complex protein 1 subunit alpha OS=Saccharomyces cerevisiae (strain ATCC 204508 / S288c) GN=TCP1 PE=1 SV=2	T-complex protein 1 subunit alpha	TCP1	5.85879	6.00974	5.78804	5.74151	5.9034	0.764	0.591	0.379	0.815633
A6ZZR2	RNA polymerase II degradation factor 1 OS=Saccharomyces cerevisiae (strain YJM789) GN=DEF1 PE=3 SV=1	RNA polymerase II degradation factor 1	DEF1	7.56057	7.46087	7.5691	7.44503	7.40481	0.765	0.591	0.38	0.815633
P53235	Eukaryotic translation initiation factor 2A OS=Saccharomyces cerevisiae (strain ATCC 204508 / S288c) GN=YGR054W PE=1 SV=1	Eukaryotic translation initiation factor 2A	YGR054W	5.42065	5.69547	5.2818	5.34209	5.56525	0.764	0.591	0.379	0.815633
P25623	Suppressor of yeast profilin deletion OS=Saccharomyces cerevisiae (strain ATCC 204508 / S288c) GN=SYP1 PE=1 SV=3	Suppressor of yeast profilin deletion	SYP1	5.82089	5.56849	5.24283	5.49167	5.63131	0.758	0.594	0.378	0.816989
Q12496	Uncharacterized protein YOL098C OS=Saccharomyces cerevisiae (strain ATCC 204508 / S288c) GN=YOL098C PE=1 SV=1	Uncharacterized protein YOL098C	YOL098C	4.84807	4.85884	5.08895	4.93584	5.04998	0.756	0.595	0.377	0.816989
P38011	Guanine nucleotide-binding protein subunit beta-like protein OS=Saccharomyces cerevisiae (strain ATCC 204508 / S288c) GN=ASC1 PE=1 SV=4	Guanine nucleotide-binding protein subunit beta-like protein	ASC1	8.07982	8.02868	9.09825	8.35225	7.9444	0.755	0.596	0.377	0.816989
P53852	Cysteine--tRNA ligase OS=Saccharomyces cerevisiae (strain ATCC 204508 / S288c) GN=YNL247W PE=1 SV=1	Cysteine--tRNA ligase	YNL247W	7.4536	7.53205	7.23443	7.3034	7.35742	0.748	0.599	0.374	0.818293
P00942	Triosephosphate isomerase OS=Saccharomyces cerevisiae (strain ATCC 204508 / S288c) GN=TPI1 PE=1 SV=2	Triosephosphate isomerase	TPI1	10.3462	10.3625	10.5289	10.5959	10.1036	0.747	0.6	0.374	0.818293
P40106	Glycerol-1-phosphate phosphohydrolase 2 OS=Saccharomyces cerevisiae (strain ATCC 204508 / S288c) GN=GPP2 PE=1 SV=1	Glycerol-1-phosphate phosphohydrolase 2	GPP2	6.39815	6.54364	6.53268	6.40573	6.55542	0.745	0.601	0.373	0.818293
Q04947	Reticulon-like protein 1 OS=Saccharomyces cerevisiae (strain ATCC 204508 / S288c) GN=RTN1 PE=1 SV=1	Reticulon-like protein 1	RTN1	7.8644	7.86657	7.61983	7.70301	7.74091	0.738	0.604	0.371	0.818293
P09435	Heat shock protein SSA3 OS=Saccharomyces cerevisiae (strain ATCC 204508 / S288c) GN=SSA3 PE=1 SV=3	Heat shock protein SSA3	SSA3	8.62852	8.64876	8.63161	8.4531	8.75243	0.736	0.605	0.371	0.818293
P07283	Phosphomannomutase OS=Saccharomyces cerevisiae (strain ATCC 204508 / S288c) GN=SEC53 PE=1 SV=1	Phosphomannomutase	SEC53	7.87892	7.95413	7.56536	7.44241	7.85466	0.737	0.605	0.371	0.818293
Q03280	E3 ubiquitin-protein ligase TOM1 OS=Saccharomyces cerevisiae (strain ATCC 204508 / S288c) GN=TOM1 PE=1 SV=1	E3 ubiquitin-protein ligase TOM1	TOM1	6.90239	6.94996	6.51169	6.33318	7.04218	0.732	0.607	0.369	0.81872
P02406	60S ribosomal protein L28 OS=Saccharomyces cerevisiae (strain ATCC 204508 / S288c) GN=RPL28 PE=1 SV=3	60S ribosomal protein L28	RPL28	9.09351	9.11544	8.95349	8.94568	8.9611	0.732	0.608	0.369	0.81872
P25375	Saccharolysin OS=Saccharomyces cerevisiae (strain ATCC 204508 / S288c) GN=PRD1 PE=1 SV=1	Saccharolysin	PRD1	7.38036	8.05821	7.12272	7.5625	7.4304	0.721	0.613	0.366	0.821769
P09733	Tubulin alpha-1 chain OS=Saccharomyces cerevisiae (strain ATCC 204508 / S288c) GN=TUB1 PE=1 SV=2	Tubulin alpha-1 chain	TUB1	5.83839	6.02613	5.65193	5.67014	5.92247	0.721	0.613	0.366	0.821769
P40043	Respiratory growth induced protein 1 OS=Saccharomyces cerevisiae (strain ATCC 204508 / S288c) GN=RGI1 PE=1 SV=1	Respiratory growth induced protein 1	RGI1	4.47807	4.41175	5.6445	4.78704	4.00025	0.718	0.615	0.365	0.821769
P0CX53	60S ribosomal protein L12-A OS=Saccharomyces cerevisiae (strain ATCC 204508 / S288c) GN=RPL12A PE=1 SV=1	60S ribosomal protein L12-A	RPL12A	10.1742	10.1889	10.1593	10.0192	10.0622	0.715	0.616	0.364	0.821769
P54780	60S ribosomal protein L15-B OS=Saccharomyces cerevisiae (strain ATCC 204508 / S288c) GN=RPL15B PE=1 SV=2	60S ribosomal protein L15-B	RPL15B	7.31425	7.24511	7.73006	7.29052	7.19805	0.713	0.617	0.363	0.821769
P25719	Peptidyl-prolyl cis-trans isomerase C, mitochondrial OS=Saccharomyces cerevisiae (strain ATCC 204508 / S288c) GN=CPR3 PE=1 SV=1	Peptidyl-prolyl cis-trans isomerase C, mitochondrial	CPR3	6.49734	6.24796	6.57776	6.73798	6.29938	0.705	0.621	0.361	0.822516
P53622	Coatomer subunit alpha OS=Saccharomyces cerevisiae (strain ATCC 204508 / S288c) GN=COP1 PE=1 SV=2	Coatomer subunit alpha	COP1	5.52295	5.65513	5.67465	5.79053	5.66083	0.704	0.622	0.36	0.822516
P33297	26S protease regulatory subunit 6A OS=Saccharomyces cerevisiae (strain ATCC 204508 / S288c) GN=RPT5 PE=1 SV=3	26S protease regulatory subunit 6A	RPT5	6.86206	6.81735	6.60032	6.72522	7.00136	0.703	0.622	0.36	0.822516
P05744	60S ribosomal protein L33-A OS=Saccharomyces cerevisiae (strain ATCC 204508 / S288c) GN=RPL33A PE=1 SV=3	60S ribosomal protein L33-A	RPL33A	8.81649	8.86426	8.65814	8.67219	8.63162	0.7	0.624	0.359	0.822516
P53848	Folic acid synthesis protein FOL1 OS=Saccharomyces cerevisiae (strain ATCC 204508 / S288c) GN=FOL1 PE=1 SV=2	Folic acid synthesis protein FOL1	FOL1	6.56161	6.58747	6.23809	6.53781	6.46237	0.699	0.625	0.359	0.822516
P25294	Protein SIS1 OS=Saccharomyces cerevisiae (strain ATCC 204508 / S288c) GN=SIS1 PE=1 SV=1	Protein SIS1	SIS1	5.90127	6.00286	6.14	5.97566	6.01362	0.695	0.627	0.357	0.822516
P43598	Inhibitor of glycogen debranching 1 OS=Saccharomyces cerevisiae (strain ATCC 204508 / S288c) GN=IGD1 PE=1 SV=1	Inhibitor of glycogen debranching 1	IGD1	4.89591	5.03089	5.54315	5.40692	5.21975	0.695	0.627	0.357	0.822516
P00560	Phosphoglycerate kinase OS=Saccharomyces cerevisiae (strain ATCC 204508 / S288c) GN=PGK1 PE=1 SV=2	Phosphoglycerate kinase	PGK1	11.8991	11.7432	12.0482	11.6899	11.6918	0.685	0.632	0.354	0.825525
P38426	Trehalose synthase complex regulatory subunit TPS3 OS=Saccharomyces cerevisiae (strain ATCC 204508 / S288c) GN=TPS3 PE=1 SV=3	Trehalose synthase complex regulatory subunit TPS3	TPS3	5.33045	5.09765	5.33479	5.12048	5.06378	0.685	0.632	0.354	0.825525
P38986	L-asparaginase 1 OS=Saccharomyces cerevisiae (strain ATCC 204508 / S288c) GN=ASP1 PE=1 SV=1	L-asparaginase 1	ASP1	7.24615	7.16683	7.00502	7.18811	7.08192	0.682	0.634	0.353	0.825747
P35189	Transcription initiation factor TFIID subunit 14 OS=Saccharomyces cerevisiae (strain ATCC 204508 / S288c) GN=TAF14 PE=1 SV=1	Transcription initiation factor TFIID subunit 14	TAF14	4.85081	4.84995	4.69536	4.42702	4.7918	0.678	0.636	0.352	0.825747
P28240	Isocitrate lyase OS=Saccharomyces cerevisiae (strain ATCC 204508 / S288c) GN=ICL1 PE=1 SV=1	Isocitrate lyase	ICL1	6.92497	6.81318	7.07205	6.89594	7.0555	0.669	0.641	0.349	0.825747
Q03940	RuvB-like protein 1 OS=Saccharomyces cerevisiae (strain ATCC 204508 / S288c) GN=RVB1 PE=1 SV=1	RuvB-like protein 1	RVB1	4.6078	4.60501	4.29027	4.78228	4.68781	0.669	0.641	0.349	0.825747
P41277	Glycerol-1-phosphate phosphohydrolase 1 OS=Saccharomyces cerevisiae (strain ATCC 204508 / S288c) GN=GPP1 PE=1 SV=3	Glycerol-1-phosphate phosphohydrolase 1	GPP1	8.976	8.99936	8.89253	8.83219	8.91719	0.667	0.642	0.348	0.825747
P25293	Nucleosome assembly protein OS=Saccharomyces cerevisiae (strain ATCC 204508 / S288c) GN=NAP1 PE=1 SV=2	Nucleosome assembly protein	NAP1	7.00546	6.9352	6.80639	6.93564	6.98571	0.667	0.642	0.348	0.825747
P00410	Cytochrome c oxidase subunit 2 OS=Saccharomyces cerevisiae (strain ATCC 204508 / S288c) GN=COX2 PE=1 SV=1	Cytochrome c oxidase subunit 2	COX2	6.78487	6.81484	6.5878	6.6501	6.82134	0.667	0.642	0.348	0.825747
Q05506	Arginine--tRNA ligase, cytoplasmic OS=Saccharomyces cerevisiae (strain ATCC 204508 / S288c) GN=YDR341C PE=1 SV=1	Arginine--tRNA ligase, cytoplasmic	YDR341C	8.17069	8.18735	8.27535	8.46199	8.11707	0.665	0.643	0.347	0.825747
P00359	Glyceraldehyde-3-phosphate dehydrogenase 3 OS=Saccharomyces cerevisiae (strain ATCC 204508 / S288c) GN=TDH3 PE=1 SV=3	Glyceraldehyde-3-phosphate dehydrogenase 3	TDH3	12.1639	11.9244	12.3381	11.7744	11.8995	0.661	0.645	0.346	0.826576
P39726	Glycine cleavage system H protein, mitochondrial OS=Saccharomyces cerevisiae (strain ATCC 204508 / S288c) GN=GCV3 PE=1 SV=3	Glycine cleavage system H protein, mitochondrial	GCV3	6.0038	6.00671	5.71818	6.08865	6.6965	0.659	0.647	0.345	0.8274
P33338	Protein SLA2 OS=Saccharomyces cerevisiae (strain ATCC 204508 / S288c) GN=SLA2 PE=1 SV=5	Protein SLA2	SLA2	4.94569	5.04579	4.76262	5.02124	5.02509	0.654	0.649	0.343	0.827766
P0CX51	40S ribosomal protein S16-A OS=Saccharomyces cerevisiae (strain ATCC 204508 / S288c) GN=RPS16A PE=1 SV=1	40S ribosomal protein S16-A	RPS16A	8.91023	8.90042	9.27562	8.86003	8.84771	0.652	0.65	0.343	0.827766
P14126	60S ribosomal protein L3 OS=Saccharomyces cerevisiae (strain ATCC 204508 / S288c) GN=RPL3 PE=1 SV=4	60S ribosomal protein L3	RPL3	10.3172	10.2111	10.1976	10.331	10.2038	0.631	0.662	0.336	0.836715
P38088	Glycine--tRNA ligase 1, mitochondrial OS=Saccharomyces cerevisiae (strain ATCC 204508 / S288c) GN=GRS1 PE=1 SV=3	Glycine--tRNA ligase 1, mitochondrial	GRS1	9.41383	9.1819	8.91323	8.6312	8.75749	0.631	0.662	0.335	0.836715
P07244	Bifunctional purine biosynthetic protein ADE5,7 OS=Saccharomyces cerevisiae (strain ATCC 204508 / S288c) GN=ADE5,7 PE=1 SV=1	Bifunctional purine biosynthetic protein ADE5,7	ADE5,7	9.26698	9.28009	9.00971	9.09869	9.20156	0.626	0.664	0.334	0.836715
Q05911	Adenylosuccinate lyase OS=Saccharomyces cerevisiae (strain ATCC 204508 / S288c) GN=ADE13 PE=1 SV=1	Adenylosuccinate lyase	ADE13	8.22855	8.22181	8.14041	8.18051	8.13441	0.628	0.664	0.334	0.836715
Q12118	Small glutamine-rich tetratricopeptide repeat-containing protein 2 OS=Saccharomyces cerevisiae (strain ATCC 204508 / S288c) GN=SGT2 PE=1 SV=1	Small glutamine-rich tetratricopeptide repeat-containing protein 2	SGT2	6.95819	7.01807	7.01691	6.8137	6.97725	0.627	0.664	0.334	0.836715
P00175	Cytochrome b2, mitochondrial OS=Saccharomyces cerevisiae (strain ATCC 204508 / S288c) GN=CYB2 PE=1 SV=1	Cytochrome b2, mitochondrial	CYB2	4.85574	5.04541	4.84713	4.95383	4.71375	0.622	0.667	0.332	0.836715
P40086	Cytochrome c oxidase assembly protein COX15 OS=Saccharomyces cerevisiae (strain ATCC 204508 / S288c) GN=COX15 PE=3 SV=1	Cytochrome c oxidase assembly protein COX15	COX15	6.31336	6.26926	6.06148	5.99318	6.32353	0.622	0.667	0.332	0.836715
Q02486	ARS-binding factor 2, mitochondrial OS=Saccharomyces cerevisiae (strain ATCC 204508 / S288c) GN=ABF2 PE=1 SV=1	ARS-binding factor 2, mitochondrial	ABF2	7.17119	6.94637	7.05915	6.96896	7.05296	0.62	0.668	0.332	0.836715
P40581	Peroxiredoxin HYR1 OS=Saccharomyces cerevisiae (strain ATCC 204508 / S288c) GN=HYR1 PE=1 SV=1	Peroxiredoxin HYR1	HYR1	6.37522	6.637	6.64276	6.77621	6.28343	0.611	0.673	0.328	0.837352
P40302	Proteasome subunit alpha type-6 OS=Saccharomyces cerevisiae (strain ATCC 204508 / S288c) GN=PRE5 PE=1 SV=1	Proteasome subunit alpha type-6	PRE5	6.96111	7.03511	6.85703	6.78449	6.90038	0.611	0.673	0.328	0.837352
P36015	Synaptobrevin homolog YKT6 OS=Saccharomyces cerevisiae (strain ATCC 204508 / S288c) GN=YKT6 PE=1 SV=1	Synaptobrevin homolog YKT6	YKT6	5.84482	6.02343	5.94122	5.97024	5.83463	0.612	0.673	0.329	0.837352
P20459	Eukaryotic translation initiation factor 2 subunit alpha OS=Saccharomyces cerevisiae (strain ATCC 204508 / S288c) GN=SUI2 PE=1 SV=1	Eukaryotic translation initiation factor 2 subunit alpha	SUI2	7.08625	7.0758	7.26308	7.2544	7.02978	0.611	0.674	0.328	0.837352
P43577	Glucosamine 6-phosphate N-acetyltransferase OS=Saccharomyces cerevisiae (strain ATCC 204508 / S288c) GN=GNA1 PE=1 SV=1	Glucosamine 6-phosphate N-acetyltransferase	GNA1	5.26161	4.0243	4.20216	3.87626	3.47363	0.607	0.676	0.327	0.83813
P21243	Proteasome subunit alpha type-1 OS=Saccharomyces cerevisiae (strain ATCC 204508 / S288c) GN=SCL1 PE=1 SV=1	Proteasome subunit alpha type-1	SCL1	6.92819	6.86808	6.77424	6.70781	6.75881	0.602	0.679	0.325	0.839676
Q08969	Protein GRE1 OS=Saccharomyces cerevisiae (strain ATCC 204508 / S288c) GN=GRE1 PE=1 SV=1	Protein GRE1	GRE1	5.48124	5.46677	5.40791	5.2101	5.62482	0.6	0.68	0.324	0.839676
Q04409	Putative glucokinase-2 OS=Saccharomyces cerevisiae (strain ATCC 204508 / S288c) GN=EMI2 PE=1 SV=1	Putative glucokinase-2	EMI2	8.04452	8.08324	7.8796	7.94609	7.97089	0.595	0.682	0.322	0.840444
P07284	Serine--tRNA ligase, cytoplasmic OS=Saccharomyces cerevisiae (strain ATCC 204508 / S288c) GN=SES1 PE=1 SV=2	Serine--tRNA ligase, cytoplasmic	SES1	8.11571	8.17366	8.00243	7.98159	8.09274	0.582	0.69	0.318	0.848589
A6ZXM9	ATPase GET3 OS=Saccharomyces cerevisiae (strain YJM789) GN=GET3 PE=3 SV=1	ATPase GET3	GET3	6.2784	6.35132	6.01982	5.99621	6.26533	0.578	0.692	0.316	0.849336
P22203	V-type proton ATPase subunit E OS=Saccharomyces cerevisiae (strain ATCC 204508 / S288c) GN=VMA4 PE=1 SV=4	V-type proton ATPase subunit E	VMA4	7.98252	7.90279	7.9504	7.96787	7.79954	0.568	0.698	0.312	0.854
P38249	Eukaryotic translation initiation factor 3 subunit A OS=Saccharomyces cerevisiae (strain ATCC 204508 / S288c) GN=RPG1 PE=1 SV=1	Eukaryotic translation initiation factor 3 subunit A	RPG1	3.90259	4.10294	4.4934	4.35151	4.08001	0.566	0.699	0.312	0.854
P32861	UTP--glucose-1-phosphate uridylyltransferase OS=Saccharomyces cerevisiae (strain ATCC 204508 / S288c) GN=UGP1 PE=1 SV=1	UTP--glucose-1-phosphate uridylyltransferase	UGP1	9.83073	9.90963	9.92159	9.80717	9.80975	0.565	0.7	0.311	0.854
Q12159	RNA annealing protein YRA1 OS=Saccharomyces cerevisiae (strain ATCC 204508 / S288c) GN=YRA1 PE=1 SV=2	RNA annealing protein YRA1	YRA1	5.34215	5.20691	5.3238	5.08095	5.09832	0.559	0.703	0.309	0.854241
P54837	Endoplasmic reticulum vesicle protein 25 OS=Saccharomyces cerevisiae (strain ATCC 204508 / S288c) GN=ERV25 PE=1 SV=1	Endoplasmic reticulum vesicle protein 25	ERV25	6.35157	6.38698	6.34927	6.16536	6.57142	0.556	0.705	0.308	0.854241
P18562	Uracil phosphoribosyltransferase OS=Saccharomyces cerevisiae (strain ATCC 204508 / S288c) GN=FUR1 PE=1 SV=2	Uracil phosphoribosyltransferase	FUR1	7.72327	7.79082	7.73463	7.83406	7.60308	0.555	0.706	0.307	0.854241
P38115	D-arabinose dehydrogenase [NAD(P)+] heavy chain OS=Saccharomyces cerevisiae (strain ATCC 204508 / S288c) GN=ARA1 PE=1 SV=1	D-arabinose dehydrogenase [NAD(P)+] heavy chain	ARA1	6.31775	6.32226	6.24657	6.08116	6.1985	0.551	0.708	0.306	0.854241
P37262	6-phosphogluconolactonase-like protein 2 OS=Saccharomyces cerevisiae (strain ATCC 204508 / S288c) GN=SOL2 PE=1 SV=2	6-phosphogluconolactonase-like protein 2	SOL2	7.05729	7.11722	6.90196	6.93391	7.07501	0.55	0.709	0.306	0.854241
P38804	Restriction of telomere capping protein 3 OS=Saccharomyces cerevisiae (strain ATCC 204508 / S288c) GN=RTC3 PE=1 SV=1	Restriction of telomere capping protein 3	RTC3	4.66259	4.50053	4.9944	4.48256	4.89592	0.549	0.709	0.305	0.854241
P53549	26S protease subunit RPT4 OS=Saccharomyces cerevisiae (strain ATCC 204508 / S288c) GN=RPT4 PE=1 SV=4	26S protease subunit RPT4	RPT4	7.09587	7.00781	7.02007	6.7415	7.01046	0.549	0.71	0.305	0.854241
C8ZEW0	Stationary phase protein 4 OS=Saccharomyces cerevisiae (strain Lalvin EC1118 / Prise de mousse) GN=SPG4 PE=3 SV=1	Stationary phase protein 4	SPG4	2.86801	2.77477	4.35922	3.25416	3.80339	0.545	0.712	0.304	0.854961
P27616	Phosphoribosylaminoimidazole-succinocarboxamide synthase OS=Saccharomyces cerevisiae (strain ATCC 204508 / S288c) GN=ADE1 PE=1 SV=2	Phosphoribosylaminoimidazole-succinocarboxamide synthase	ADE1	5.98466	5.88111	5.86404	6.09508	5.89731	0.539	0.716	0.301	0.855173
E7KV71	Spindle pole component BBP1 OS=Saccharomyces cerevisiae (strain Lalvin QA23) GN=BBP1 PE=3 SV=1	Spindle pole component BBP1	BBP1	7.86879	8.06352	7.51295	7.53238	7.86718	0.537	0.717	0.3	0.855173
P06169	Pyruvate decarboxylase isozyme 1 OS=Saccharomyces cerevisiae (strain ATCC 204508 / S288c) GN=PDC1 PE=1 SV=7	Pyruvate decarboxylase isozyme 1	PDC1	11.8041	11.6967	11.7562	11.7912	11.565	0.533	0.719	0.299	0.855173
P11986	Inositol-3-phosphate synthase OS=Saccharomyces cerevisiae (strain ATCC 204508 / S288c) GN=INO1 PE=1 SV=3	Inositol-3-phosphate synthase	INO1	7.93565	7.81819	7.74376	7.9353	8.00967	0.53	0.721	0.298	0.855173
P22217	Thioredoxin-1 OS=Saccharomyces cerevisiae (strain ATCC 204508 / S288c) GN=TRX1 PE=1 SV=3	Thioredoxin-1	TRX1	5.60259	5.68857	5.87262	5.62235	5.81889	0.527	0.723	0.296	0.855173
P47137	Uncharacterized oxidoreductase YJR096W OS=Saccharomyces cerevisiae (strain ATCC 204508 / S288c) GN=YJR096W PE=1 SV=1	Uncharacterized oxidoreductase YJR096W	YJR096W	7.19784	7.05074	7.07948	7.03858	7.08217	0.523	0.725	0.295	0.855173
Q08686	Thiosulfate sulfurtransferase TUM1 OS=Saccharomyces cerevisiae (strain ATCC 204508 / S288c) GN=TUM1 PE=1 SV=1	Thiosulfate sulfurtransferase TUM1	TUM1	5.95656	6.1406	6.39078	6.07881	5.88676	0.523	0.725	0.295	0.855173
P00360	Glyceraldehyde-3-phosphate dehydrogenase 1 OS=Saccharomyces cerevisiae (strain ATCC 204508 / S288c) GN=TDH1 PE=1 SV=3	Glyceraldehyde-3-phosphate dehydrogenase 1	TDH1	10.9128	10.7297	10.8285	10.8816	10.6124	0.522	0.726	0.295	0.855173
P53090	Aromatic/aminoadipate aminotransferase 1 OS=Saccharomyces cerevisiae (strain ATCC 204508 / S288c) GN=ARO8 PE=1 SV=1	Aromatic/aminoadipate aminotransferase 1	ARO8	7.23205	7.17254	7.09998	7.23733	7.21026	0.521	0.727	0.294	0.855173
P32288	Glutamine synthetase OS=Saccharomyces cerevisiae (strain ATCC 204508 / S288c) GN=GLN1 PE=1 SV=4	Glutamine synthetase	GLN1	7.70351	7.7592	7.79143	7.85907	7.65396	0.52	0.727	0.294	0.855173
P37302	Aminopeptidase Y OS=Saccharomyces cerevisiae (strain ATCC 204508 / S288c) GN=APE3 PE=1 SV=1	Aminopeptidase Y	APE3	8.34605	8.47381	8.35878	8.38683	8.33288	0.517	0.729	0.293	0.855173
Q01855	40S ribosomal protein S15 OS=Saccharomyces cerevisiae (strain ATCC 204508 / S288c) GN=RPS15 PE=1 SV=1	40S ribosomal protein S15	RPS15	8.48081	8.44229	8.35736	8.52328	8.28713	0.517	0.729	0.293	0.855173
P47120	Deoxyhypusine hydroxylase OS=Saccharomyces cerevisiae (strain ATCC 204508 / S288c) GN=LIA1 PE=1 SV=1	Deoxyhypusine hydroxylase	LIA1	7.16294	7.27717	7.18402	7.07844	7.2474	0.512	0.732	0.29	0.855402
P07143	Cytochrome c1, heme protein, mitochondrial OS=Saccharomyces cerevisiae (strain ATCC 204508 / S288c) GN=CYT1 PE=1 SV=1	Cytochrome c1, heme protein, mitochondrial	CYT1	3.64318	3.57414	4.07605	4.37782	3.54897	0.511	0.732	0.29	0.855402
P43616	Cys-Gly metallodipeptidase DUG1 OS=Saccharomyces cerevisiae (strain ATCC 204508 / S288c) GN=DUG1 PE=1 SV=1	Cys-Gly metallodipeptidase DUG1	DUG1	7.05665	7.18341	7.49855	7.28744	7.11411	0.508	0.734	0.289	0.85563
P02400	60S acidic ribosomal protein P2-beta OS=Saccharomyces cerevisiae (strain ATCC 204508 / S288c) GN=RPP2B PE=1 SV=2	60S acidic ribosomal protein P2-beta	RPP2B	8.52797	8.72178	8.54922	8.5185	8.41586	0.508	0.735	0.289	0.85563
P25491	Mitochondrial protein import protein MAS5 OS=Saccharomyces cerevisiae (strain ATCC 204508 / S288c) GN=YDJ1 PE=1 SV=1	Mitochondrial protein import protein MAS5	YDJ1	8.09153	8.0708	7.9451	8.05244	8.13121	0.501	0.738	0.286	0.857015
P04802	Aspartate--tRNA ligase, cytoplasmic OS=Saccharomyces cerevisiae (strain ATCC 204508 / S288c) GN=DPS1 PE=1 SV=3	Aspartate--tRNA ligase, cytoplasmic	DPS1	8.95472	8.99945	9.03734	8.86567	9.12264	0.501	0.739	0.286	0.857015
Q08977	UPF0662 protein YPL260W OS=Saccharomyces cerevisiae (strain ATCC 204508 / S288c) GN=YPL260W PE=1 SV=1	UPF0662 protein YPL260W	YPL260W	7.47217	7.58979	7.2473	7.37488	7.50204	0.481	0.751	0.278	0.868475
P38827	Histone-lysine N-methyltransferase, H3 lysine-4 specific OS=Saccharomyces cerevisiae (strain ATCC 204508 / S288c) GN=SET1 PE=1 SV=1	Histone-lysine N-methyltransferase, H3 lysine-4 specific	SET1	6.28798	5.7795	6.09081	6.12005	6.2229	0.478	0.753	0.277	0.868475
P41058	40S ribosomal protein S29-B OS=Saccharomyces cerevisiae (strain ATCC 204508 / S288c) GN=RPS29B PE=1 SV=3	40S ribosomal protein S29-B	RPS29B	8.08837	7.97613	7.81381	7.77431	8.20397	0.476	0.754	0.276	0.868475
Q3E841	Uncharacterized protein YNR034W-A OS=Saccharomyces cerevisiae (strain ATCC 204508 / S288c) GN=YNR034W-A PE=1 SV=1	Uncharacterized protein YNR034W-A	YNR034W-A	6.16476	6.37472	5.88281	6.26816	5.90209	0.475	0.755	0.275	0.868475
P41807	V-type proton ATPase subunit H OS=Saccharomyces cerevisiae (strain ATCC 204508 / S288c) GN=VMA13 PE=1 SV=1	V-type proton ATPase subunit H	VMA13	5.91856	5.88711	6.02771	6.00419	5.96261	0.473	0.756	0.274	0.868475
P52910	Acetyl-coenzyme A synthetase 2 OS=Saccharomyces cerevisiae (strain ATCC 204508 / S288c) GN=ACS2 PE=1 SV=1	Acetyl-coenzyme A synthetase 2	ACS2	6.76569	6.80317	6.67623	6.65395	6.79916	0.464	0.762	0.271	0.872083
P32915	Protein transport protein SEC61 OS=Saccharomyces cerevisiae (strain ATCC 204508 / S288c) GN=SEC61 PE=1 SV=1	Protein transport protein SEC61	SEC61	6.76444	6.64924	6.63085	6.62356	6.85883	0.463	0.762	0.27	0.872083
P32590	Heat shock protein homolog SSE2 OS=Saccharomyces cerevisiae (strain ATCC 204508 / S288c) GN=SSE2 PE=1 SV=3	Heat shock protein homolog SSE2	SSE2	7.4097	7.36276	7.30006	7.28392	7.33476	0.452	0.769	0.266	0.875609
P17695	Glutaredoxin-2, mitochondrial OS=Saccharomyces cerevisiae (strain ATCC 204508 / S288c) GN=GRX2 PE=1 SV=3	Glutaredoxin-2, mitochondrial	GRX2	7.79836	7.7727	7.70942	7.64023	7.76675	0.449	0.771	0.264	0.875609
Q06151	m7GpppX diphosphatase OS=Saccharomyces cerevisiae (strain ATCC 204508 / S288c) GN=DCS1 PE=1 SV=1	m7GpppX diphosphatase	DCS1	7.50346	7.59266	7.33419	7.28884	7.44076	0.447	0.772	0.263	0.875609
P32463	Acyl carrier protein, mitochondrial OS=Saccharomyces cerevisiae (strain ATCC 204508 / S288c) GN=ACP1 PE=1 SV=1	Acyl carrier protein, mitochondrial	ACP1	4.50894	4.58395	4.85323	4.89776	4.62861	0.447	0.772	0.263	0.875609
P11745	Ran GTPase-activating protein 1 OS=Saccharomyces cerevisiae (strain ATCC 204508 / S288c) GN=RNA1 PE=1 SV=2	Ran GTPase-activating protein 1	RNA1	5.55787	5.58318	5.39909	5.39701	5.59787	0.444	0.774	0.262	0.875609
Q04304	UPF0659 protein YMR090W OS=Saccharomyces cerevisiae (strain ATCC 204508 / S288c) GN=YMR090W PE=1 SV=1	UPF0659 protein YMR090W	YMR090W	6.88717	6.90619	6.7904	6.96333	6.86361	0.445	0.774	0.262	0.875609
A6ZT99	Nascent polypeptide-associated complex subunit alpha OS=Saccharomyces cerevisiae (strain YJM789) GN=EGD2 PE=3 SV=1	Nascent polypeptide-associated complex subunit alpha	EGD2	8.39818	8.37947	8.42208	8.37701	8.25238	0.439	0.777	0.26	0.875609
P00431	Cytochrome c peroxidase, mitochondrial OS=Saccharomyces cerevisiae (strain ATCC 204508 / S288c) GN=CCP1 PE=1 SV=2	Cytochrome c peroxidase, mitochondrial	CCP1	7.76825	7.86828	7.73763	7.88463	7.88415	0.438	0.778	0.26	0.875609
Q3E795	Uncharacterized protein YLR361C-A OS=Saccharomyces cerevisiae (strain ATCC 204508 / S288c) GN=YLR361C-A PE=1 SV=1	Uncharacterized protein YLR361C-A	YLR361C-A	6.13875	6.1155	6.09694	6.2269	6.12219	0.438	0.778	0.259	0.875609
P40509	Coatomer subunit epsilon OS=Saccharomyces cerevisiae (strain ATCC 204508 / S288c) GN=SEC28 PE=1 SV=2	Coatomer subunit epsilon	SEC28	6.09444	6.33678	6.06652	6.02596	6.21362	0.432	0.782	0.257	0.877996
P31787	Acyl-CoA-binding protein OS=Saccharomyces cerevisiae (strain ATCC 204508 / S288c) GN=ACB1 PE=1 SV=3	Acyl-CoA-binding protein	ACB1	6.85629	6.94709	6.89709	7.00264	6.74147	0.43	0.783	0.256	0.877996
P38219	Obg-like ATPase 1 OS=Saccharomyces cerevisiae (strain ATCC 204508 / S288c) GN=OLA1 PE=1 SV=1	Obg-like ATPase 1	OLA1	7.10604	7.58732	7.71329	7.68707	7.3972	0.422	0.788	0.252	0.881111
P0CX84	60S ribosomal protein L35-A OS=Saccharomyces cerevisiae (strain ATCC 204508 / S288c) GN=RPL35A PE=1 SV=1	60S ribosomal protein L35-A	RPL35A	7.08416	7.11412	7.80342	8.03613	7.57011	0.42	0.79	0.251	0.881111
P25443	40S ribosomal protein S2 OS=Saccharomyces cerevisiae (strain ATCC 204508 / S288c) GN=RPS2 PE=1 SV=3	40S ribosomal protein S2	RPS2	7.17474	7.23523	7.62536	7.63664	7.07787	0.416	0.792	0.25	0.881111
P27614	Carboxypeptidase S OS=Saccharomyces cerevisiae (strain ATCC 204508 / S288c) GN=CPS1 PE=1 SV=2	Carboxypeptidase S	CPS1	8.06827	7.94861	7.91006	8.05017	7.91045	0.416	0.792	0.25	0.881111
P47079	T-complex protein 1 subunit theta OS=Saccharomyces cerevisiae (strain ATCC 204508 / S288c) GN=CCT8 PE=1 SV=1	T-complex protein 1 subunit theta	CCT8	5.88424	5.73126	5.7394	5.97878	5.67771	0.415	0.793	0.249	0.881111
P05318	60S acidic ribosomal protein P1-alpha OS=Saccharomyces cerevisiae (strain ATCC 204508 / S288c) GN=RPP1A PE=1 SV=4	60S acidic ribosomal protein P1-alpha	RPP1A	6.66119	6.81124	7.12685	6.76169	6.74914	0.41	0.796	0.247	0.882204
P12709	Glucose-6-phosphate isomerase OS=Saccharomyces cerevisiae (strain ATCC 204508 / S288c) GN=PGI1 PE=1 SV=3	Glucose-6-phosphate isomerase	PGI1	10.1887	10.2359	10.4415	10.3244	10.1388	0.403	0.8	0.244	0.882204
C8ZG13	Adenylosuccinate synthetase OS=Saccharomyces cerevisiae (strain Lalvin EC1118 / Prise de mousse) GN=ADE12 PE=3 SV=1	Adenylosuccinate synthetase	ADE12	8.71337	8.68847	8.59894	8.71922	8.60709	0.402	0.801	0.243	0.882204
P28273	5-oxoprolinase OS=Saccharomyces cerevisiae (strain ATCC 204508 / S288c) GN=OXP1 PE=1 SV=2	5-oxoprolinase	OXP1	6.75122	6.74365	6.63735	6.86772	6.62637	0.401	0.802	0.243	0.882204
O14455	60S ribosomal protein L36-B OS=Saccharomyces cerevisiae (strain ATCC 204508 / S288c) GN=RPL36B PE=1 SV=3	60S ribosomal protein L36-B	RPL36B	8.94061	8.85221	8.96	9.17066	8.79466	0.397	0.804	0.241	0.882204
P35719	Uncharacterized protein MRP8 OS=Saccharomyces cerevisiae (strain ATCC 204508 / S288c) GN=MRP8 PE=1 SV=1	Uncharacterized protein MRP8	MRP8	3.74494	3.76588	3.6101	3.52053	3.47577	0.396	0.805	0.24	0.882204
P25619	30 kDa heat shock protein OS=Saccharomyces cerevisiae (strain ATCC 204508 / S288c) GN=HSP30 PE=1 SV=1	30 kDa heat shock protein	HSP30	6.05505	6.03521	6.34698	6.36754	5.97245	0.394	0.806	0.24	0.882204
P10622	60S acidic ribosomal protein P1-beta OS=Saccharomyces cerevisiae (strain ATCC 204508 / S288c) GN=RPP1B PE=1 SV=3	60S acidic ribosomal protein P1-beta	RPP1B	6.24159	6.26915	6.33553	6.33101	6.04136	0.393	0.807	0.239	0.882204
P25373	Glutaredoxin-1 OS=Saccharomyces cerevisiae (strain ATCC 204508 / S288c) GN=GRX1 PE=1 SV=1	Glutaredoxin-1	GRX1	5.84302	5.86326	5.78816	5.90809	5.93014	0.392	0.807	0.239	0.882204
C7GTE8	Signal transduction protein MDG1 OS=Saccharomyces cerevisiae (strain JAY291) GN=MDG1 PE=3 SV=1	Signal transduction protein MDG1	MDG1	5.16062	5.0897	5.34109	5.11237	4.94937	0.389	0.809	0.238	0.882809
P24276	Protein SSD1 OS=Saccharomyces cerevisiae (strain ATCC 204508 / S288c) GN=SSD1 PE=1 SV=1	Protein SSD1	SSD1	4.90691	4.86639	4.77425	5.03447	4.93998	0.387	0.811	0.236	0.882923
P24280	SEC14 cytosolic factor OS=Saccharomyces cerevisiae (strain ATCC 204508 / S288c) GN=SEC14 PE=1 SV=3	SEC14 cytosolic factor	SEC14	7.58031	7.5911	7.50334	7.62905	7.5428	0.385	0.812	0.235	0.882923
P04449	60S ribosomal protein L24-A OS=Saccharomyces cerevisiae (strain ATCC 204508 / S288c) GN=RPL24A PE=1 SV=1	60S ribosomal protein L24-A	RPL24A	8.96367	9.07484	9.21236	8.97228	8.94253	0.379	0.816	0.233	0.883635
P21576	Vacuolar protein sorting-associated protein 1 OS=Saccharomyces cerevisiae (strain ATCC 204508 / S288c) GN=VPS1 PE=1 SV=2	Vacuolar protein sorting-associated protein 1	VPS1	5.8294	5.60211	5.54936	5.61784	5.47729	0.379	0.816	0.232	0.883635
P39522	Dihydroxy-acid dehydratase, mitochondrial OS=Saccharomyces cerevisiae (strain ATCC 204508 / S288c) GN=ILV3 PE=1 SV=2	Dihydroxy-acid dehydratase, mitochondrial	ILV3	4.78074	4.96276	5.28648	5.4656	4.77493	0.377	0.817	0.232	0.883635
A6ZS33	Leukotriene A-4 hydrolase homolog OS=Saccharomyces cerevisiae (strain YJM789) GN=SCY_4744 PE=3 SV=1	Leukotriene A-4 hydrolase homolog	SCY_4744	6.01001	5.85326	5.94694	5.89954	5.95934	0.37	0.822	0.228	0.885414
Q01519	Cytochrome c oxidase subunit 6B OS=Saccharomyces cerevisiae (strain ATCC 204508 / S288c) GN=COX12 PE=1 SV=2	Cytochrome c oxidase subunit 6B	COX12	5.17564	5.33303	5.04325	5.17445	5.19164	0.369	0.822	0.228	0.885414
P38817	ADP-ribosylation factor-binding protein GGA2 OS=Saccharomyces cerevisiae (strain ATCC 204508 / S288c) GN=GGA2 PE=1 SV=1	ADP-ribosylation factor-binding protein GGA2	GGA2	5.37783	5.23844	5.18231	5.33883	5.55449	0.367	0.823	0.227	0.885414
P39708	NADP-specific glutamate dehydrogenase 2 OS=Saccharomyces cerevisiae (strain ATCC 204508 / S288c) GN=GDH3 PE=3 SV=1	NADP-specific glutamate dehydrogenase 2	GDH3	7.96074	7.89935	7.73764	7.94728	7.79695	0.361	0.827	0.224	0.886105
Q12109	Tryptophan--tRNA ligase, cytoplasmic OS=Saccharomyces cerevisiae (strain ATCC 204508 / S288c) GN=WRS1 PE=1 SV=1	Tryptophan--tRNA ligase, cytoplasmic	WRS1	3.94294	4.08553	3.76608	3.92717	3.92768	0.36	0.828	0.224	0.886105
Q03148	Pyridoxal 5'-phosphate synthase subunit SNZ1 OS=Saccharomyces cerevisiae (strain ATCC 204508 / S288c) GN=SNZ1 PE=1 SV=1	Pyridoxal 5'-phosphate synthase subunit SNZ1	SNZ1	6.2127	6.20751	6.08087	6.19054	6.24202	0.36	0.828	0.223	0.886105
P32264	Glutamate 5-kinase OS=Saccharomyces cerevisiae (strain ATCC 204508 / S288c) GN=PRO1 PE=1 SV=2	Glutamate 5-kinase	PRO1	5.2005	5.13641	5.13274	5.29421	5.1512	0.354	0.832	0.221	0.888827
P38755	Oxysterol-binding protein homolog 7 OS=Saccharomyces cerevisiae (strain ATCC 204508 / S288c) GN=OSH7 PE=1 SV=1	Oxysterol-binding protein homolog 7	OSH7	5.81489	6.00401	5.78779	5.79937	5.86492	0.351	0.834	0.219	0.889406
P0CX82	60S ribosomal protein L19-A OS=Saccharomyces cerevisiae (strain ATCC 204508 / S288c) GN=RPL19A PE=1 SV=1	60S ribosomal protein L19-A	RPL19A	7.65401	7.76419	7.45721	7.75994	7.56315	0.332	0.846	0.21	0.900628
P40029	Peptide methionine sulfoxide reductase OS=Saccharomyces cerevisiae (strain ATCC 204508 / S288c) GN=MXR1 PE=1 SV=1	Peptide methionine sulfoxide reductase	MXR1	6.0321	6.03439	5.97035	5.82991	6.04952	0.322	0.852	0.205	0.905436
P47771	Aldehyde dehydrogenase [NAD(P)+] 1 OS=Saccharomyces cerevisiae (strain ATCC 204508 / S288c) GN=ALD2 PE=1 SV=2	Aldehyde dehydrogenase [NAD(P)+] 1	ALD2	7.7773	7.75601	7.62534	7.78305	7.66347	0.313	0.859	0.2	0.908152
P02992	Elongation factor Tu, mitochondrial OS=Saccharomyces cerevisiae (strain ATCC 204508 / S288c) GN=TUF1 PE=1 SV=1	Elongation factor Tu, mitochondrial	TUF1	6.94743	6.97199	6.7794	6.83864	6.96151	0.311	0.86	0.199	0.908152
P32775	1,4-alpha-glucan-branching enzyme OS=Saccharomyces cerevisiae (strain ATCC 204508 / S288c) GN=GLC3 PE=1 SV=2	1,4-alpha-glucan-branching enzyme	GLC3	7.33062	7.23265	7.08322	7.12195	7.24282	0.311	0.86	0.199	0.908152
P53319	6-phosphogluconate dehydrogenase, decarboxylating 2 OS=Saccharomyces cerevisiae (strain ATCC 204508 / S288c) GN=GND2 PE=1 SV=1	6-phosphogluconate dehydrogenase, decarboxylating 2	GND2	5.65359	5.6781	5.61944	5.67822	5.71699	0.309	0.861	0.198	0.908152
P20606	Small COPII coat GTPase SAR1 OS=Saccharomyces cerevisiae (strain ATCC 204508 / S288c) GN=SAR1 PE=1 SV=1	Small COPII coat GTPase SAR1	SAR1	5.76696	5.73205	5.79513	5.75788	5.98513	0.308	0.862	0.198	0.908152
Q00764	Alpha,alpha-trehalose-phosphate synthase [UDP-forming] 56 kDa subunit OS=Saccharomyces cerevisiae (strain ATCC 204508 / S288c) GN=TPS1 PE=1 SV=2	Alpha,alpha-trehalose-phosphate synthase [UDP-forming] 56 kDa subunit	TPS1	4.16165	4.11318	4.50305	4.65883	4.54248	0.301	0.866	0.194	0.910793
Q04212	D-arabinose 1-dehydrogenase OS=Saccharomyces cerevisiae (strain ATCC 204508 / S288c) GN=ARA2 PE=1 SV=1	D-arabinose 1-dehydrogenase	ARA2	5.19434	5.15505	5.13946	4.96189	4.96257	0.291	0.872	0.189	0.913952
P49167	60S ribosomal protein L38 OS=Saccharomyces cerevisiae (strain ATCC 204508 / S288c) GN=RPL38 PE=1 SV=1	60S ribosomal protein L38	RPL38	6.65754	6.47334	6.39475	6.65706	6.77919	0.292	0.872	0.189	0.913952
P19262	Dihydrolipoyllysine-residue succinyltransferase component of 2-oxoglutarate dehydrogenase complex, mitochondrial OS=Saccharomyces cerevisiae (strain ATCC 204508 / S288c) GN=KGD2 PE=1 SV=2	Dihydrolipoyllysine-residue succinyltransferase component of 2-oxoglutarate dehydrogenase complex, mitochondrial	KGD2	6.2858	6.35571	6.19169	6.07499	6.36	0.274	0.883	0.18	0.923894
O14467	Multiprotein-bridging factor 1 OS=Saccharomyces cerevisiae (strain ATCC 204508 / S288c) GN=MBF1 PE=1 SV=2	Multiprotein-bridging factor 1	MBF1	7.69571	7.73789	7.73479	7.60573	7.68006	0.266	0.888	0.176	0.927534
P53315	6-phosphogluconolactonase 4 OS=Saccharomyces cerevisiae (strain ATCC 204508 / S288c) GN=SOL4 PE=1 SV=1	6-phosphogluconolactonase 4	SOL4	5.29747	5.33881	5.4906	5.37194	5.26231	0.263	0.89	0.174	0.928034
P47143	Adenosine kinase OS=Saccharomyces cerevisiae (strain ATCC 204508 / S288c) GN=ADO1 PE=1 SV=1	Adenosine kinase	ADO1	8.48588	8.50325	8.46359	8.49507	8.40646	0.254	0.896	0.169	0.931107
P06101	Hsp90 co-chaperone Cdc37 OS=Saccharomyces cerevisiae (strain ATCC 204508 / S288c) GN=CDC37 PE=1 SV=2	Hsp90 co-chaperone Cdc37	CDC37	5.55548	5.5829	5.60005	5.60059	5.40777	0.253	0.896	0.169	0.931107
P00927	Threonine dehydratase, mitochondrial OS=Saccharomyces cerevisiae (strain ATCC 204508 / S288c) GN=ILV1 PE=1 SV=2	Threonine dehydratase, mitochondrial	ILV1	5.42943	5.22616	5.14937	5.27513	5.33655	0.249	0.899	0.166	0.932636
P06787	Calmodulin OS=Saccharomyces cerevisiae (strain ATCC 204508 / S288c) GN=CMD1 PE=1 SV=1	Calmodulin	CMD1	6.14695	6.1424	6.12757	5.98943	6.13429	0.24	0.904	0.161	0.933547
P19146	ADP-ribosylation factor 2 OS=Saccharomyces cerevisiae (strain ATCC 204508 / S288c) GN=ARF2 PE=1 SV=3	ADP-ribosylation factor 2	ARF2	7.5217	7.61571	7.64926	7.66041	7.48273	0.239	0.905	0.16	0.933547
P32496	26S proteasome regulatory subunit RPN12 OS=Saccharomyces cerevisiae (strain ATCC 204508 / S288c) GN=RPN12 PE=1 SV=3	26S proteasome regulatory subunit RPN12	RPN12	6.27931	6.21437	5.88723	5.98064	6.13183	0.238	0.905	0.16	0.933547
A6ZQ59	CTP synthase 2 OS=Saccharomyces cerevisiae (strain YJM789) GN=URA8 PE=3 SV=1	CTP synthase 2	URA8	5.70071	5.63904	6.04056	5.61482	6.29229	0.238	0.906	0.16	0.933547
P39938	40S ribosomal protein S26-A OS=Saccharomyces cerevisiae (strain ATCC 204508 / S288c) GN=RPS26A PE=1 SV=1	40S ribosomal protein S26-A	RPS26A	8.7991	8.86931	8.87458	8.81274	8.77779	0.23	0.91	0.155	0.936088
P24000	60S ribosomal protein L24-B OS=Saccharomyces cerevisiae (strain ATCC 204508 / S288c) GN=RPL24B PE=1 SV=1	60S ribosomal protein L24-B	RPL24B	8.02793	8.11964	7.92121	7.88588	8.05107	0.218	0.917	0.149	0.9417
P40212	60S ribosomal protein L13-B OS=Saccharomyces cerevisiae (strain ATCC 204508 / S288c) GN=RPL13B PE=1 SV=1	60S ribosomal protein L13-B	RPL13B	8.15799	8.05905	8.15606	8.07979	8.0703	0.215	0.919	0.147	0.942168
P31116	Homoserine dehydrogenase OS=Saccharomyces cerevisiae (strain ATCC 204508 / S288c) GN=HOM6 PE=1 SV=1	Homoserine dehydrogenase	HOM6	8.87674	8.56949	8.86543	8.67727	8.78677	0.205	0.925	0.141	0.945142
P33299	26S protease regulatory subunit 7 homolog OS=Saccharomyces cerevisiae (strain ATCC 204508 / S288c) GN=RPT1 PE=1 SV=1	26S protease regulatory subunit 7 homolog	RPT1	7.76222	7.69202	7.72672	7.51635	7.59441	0.205	0.925	0.141	0.945142
P38625	GMP synthase [glutamine-hydrolyzing] OS=Saccharomyces cerevisiae (strain ATCC 204508 / S288c) GN=GUA1 PE=1 SV=4	GMP synthase [glutamine-hydrolyzing]	GUA1	9.09865	9.14762	9.12917	9.09089	9.03874	0.2	0.928	0.138	0.94606
Q12032	Altered inheritance of mitochondria protein 41, mitochondrial OS=Saccharomyces cerevisiae (strain ATCC 204508 / S288c) GN=AIM41 PE=1 SV=1	Altered inheritance of mitochondria protein 41, mitochondrial	AIM41	4.91189	5.05468	4.8393	4.88383	4.97745	0.198	0.929	0.137	0.94606
Q04062	26S proteasome regulatory subunit RPN9 OS=Saccharomyces cerevisiae (strain ATCC 204508 / S288c) GN=RPN9 PE=1 SV=1	26S proteasome regulatory subunit RPN9	RPN9	5.44466	5.45076	5.29278	5.51028	5.47383	0.19	0.934	0.132	0.949567
P00044	Cytochrome c iso-1 OS=Saccharomyces cerevisiae (strain ATCC 204508 / S288c) GN=CYC1 PE=1 SV=2	Cytochrome c iso-1	CYC1	6.76275	6.81609	6.72123	6.72434	6.74737	0.17	0.945	0.12	0.959151
P09201	Fructose-1,6-bisphosphatase OS=Saccharomyces cerevisiae (strain ATCC 204508 / S288c) GN=FBP1 PE=1 SV=2	Fructose-1,6-bisphosphatase	FBP1	8.223	8.25393	8.1846	8.28713	8.23358	0.131	0.964	0.095	0.973576
P40495	Homoisocitrate dehydrogenase, mitochondrial OS=Saccharomyces cerevisiae (strain ATCC 204508 / S288c) GN=LYS12 PE=1 SV=1	Homoisocitrate dehydrogenase, mitochondrial	LYS12	7.0211	6.97124	6.93872	6.95324	6.93152	0.131	0.964	0.095	0.973576
P0CX24	60S ribosomal protein L20-B OS=Saccharomyces cerevisiae (strain ATCC 204508 / S288c) GN=RPL20B PE=1 SV=1	60S ribosomal protein L20-B	RPL20B	8.75482	8.73989	8.82155	8.83491	8.775	0.132	0.964	0.095	0.973576
P15703	Glucan 1,3-beta-glucosidase OS=Saccharomyces cerevisiae (strain ATCC 204508 / S288c) GN=BGL2 PE=1 SV=1	Glucan 1,3-beta-glucosidase	BGL2	6.29044	6.18541	6.20628	6.18789	6.10976	0.122	0.968	0.089	0.976
P40024	ABC transporter ATP-binding protein ARB1 OS=Saccharomyces cerevisiae (strain ATCC 204508 / S288c) GN=ARB1 PE=1 SV=1	ABC transporter ATP-binding protein ARB1	ARB1	5.28242	5.28721	5.44982	5.3967	5.3119	0.117	0.971	0.086	0.977409
P33401	Phosphoglucomutase 1 OS=Saccharomyces cerevisiae (strain ATCC 204508 / S288c) GN=PGM1 PE=1 SV=1	Phosphoglucomutase 1	PGM1	5.90909	5.94821	5.9659	5.94958	5.8655	0.108	0.975	0.079	0.979211
P52286	Suppressor of kinetochore protein 1 OS=Saccharomyces cerevisiae (strain ATCC 204508 / S288c) GN=SKP1 PE=1 SV=2	Suppressor of kinetochore protein 1	SKP1	4.73705	4.87435	4.83395	4.79908	4.80899	0.104	0.976	0.077	0.979211
Q9P305	mRNA stability protein IGO2 OS=Saccharomyces cerevisiae (strain ATCC 204508 / S288c) GN=IGO2 PE=1 SV=3	mRNA stability protein IGO2	IGO2	5.53836	5.61673	5.57118	5.63045	5.59119	0.077	0.986	0.058	0.987619
P07263	Histidine--tRNA ligase, mitochondrial OS=Saccharomyces cerevisiae (strain ATCC 204508 / S288c) GN=HTS1 PE=1 SV=2	Histidine--tRNA ligase, mitochondrial	HTS1	6.88534	6.93251	6.89234	6.96607	6.91373	0.068	0.989	0.052	0.989
