# Supplementary material for: Engineering cell-free systems by chemoproteomic-assisted phenotypic screening
Source: Royal Society of Chemistry journal article supplement (doi:10.1039/d4cb00004h), 2024-01-01
Supplement: d4cb00004h3.pdf [file d4cb00004h3.pdf]

**Table S1 List of drug hits decreasing yeast extract productivity**

| <b>Drug</b>                            | <b>Mode of action</b>                    | <b>Targets</b>            |                                                                                          |
|----------------------------------------|------------------------------------------|---------------------------|------------------------------------------------------------------------------------------|
| <b>Hygromycin B</b>                    | Antibiotic                               | Ribosomes                 | 30S rRNA                                                                                 |
|                                        | inhibits protein synthesis               | Ribosome-dependent ATPase | RbbA                                                                                     |
| <b>Doxorubicin (Adriamycin)</b>        | Antibiotic                               | DNA Topoisomerase         | TOP1, TOP2A, TOP2B                                                                       |
|                                        | induces DNA damage and apoptosis         | Nucleic acids             | DNA                                                                                      |
|                                        |                                          | Nucleolar phosphoprotein  | NOLC1                                                                                    |
| <b>Puromycin 2HCl</b>                  | Antibiotic                               | Ribosomal proteins        | RPL10L, RPL13A, RPL23, RPL15, RPL19, RPL23A, RSL24D1, RPL26L1, RPL8, RPL37, RPL3, RPL11, |
|                                        | inhibits protein synthesis               | tRNA-protein transferase  | aat                                                                                      |
| <b>Proflavine Hemisulfate</b>          | Antiseptic<br>intercalates DNA           | Nucleic acids             | DNA                                                                                      |
| <b>Ethacridine lactate monohydrate</b> | Antiseptic<br>intercalates DNA           | Nucleic acids             | DNA                                                                                      |
| <b>Mitoxantrone HCl</b>                | type II topoisomerase inhibitor          | DNA Topoisomerase         | TOP2A                                                                                    |
|                                        |                                          | Nucleic acids             | DNA                                                                                      |
|                                        | intercalates DNA                         |                           |                                                                                          |
| <b>Aprotinin</b>                       | Serine protease inhibitor                | Serine protease           | PRSS1, CTRB1, PLG, KLK1                                                                  |
| <b>Gentamicin Sulfate</b>              | Antibiotic<br>inhibits protein synthesis | Ribosomes                 | rpsL, 16S rRNA, 23S rRNA,                                                                |
|                                        |                                          | Membrane                  |                                                                                          |
|                                        |                                          | Synthetase                | nadE                                                                                     |
|                                        |                                          | Reductase                 | DHFR                                                                                     |
| <b>Pentamidine</b>                     | Antiprotozoal agent                      | PRL Phosphatases          | PTP1B                                                                                    |

|                             |                                                               |                                                         |                              |
|-----------------------------|---------------------------------------------------------------|---------------------------------------------------------|------------------------------|
|                             | inhibits synthesis of DNA, RNA, phospholipids and proteins    | tRNA-methyltransferase<br>Nucleic acids                 | TRDMT1<br>DNA                |
| <b>Heparin sodium</b>       | Anticoagulant                                                 | Serpin protease inhibitor                               | SERPINC1                     |
|                             | Competitive inhibitor of RNA synthesis                        | Coagulation factor X                                    | F10                          |
|                             |                                                               | Selectin                                                | SELP                         |
|                             |                                                               | Tyrosine kinase                                         | FGFR1, FGFR2, FGFR4          |
|                             |                                                               | Fibroblast growth factor                                | FGF1, FGF2, FGF4, FGF19      |
|                             |                                                               | Cytokine                                                | PF4                          |
|                             |                                                               | Polymerases                                             | T7RNAP, polA                 |
| <b>Paromomycin Sulfate</b>  | Antibiotic inhibits protein synthesis                         | Ribosomes                                               | 16S rRNA, rpsJ, RPSA, RPL10L |
| <b>Calcium Levofolinate</b> | Calcium salt of folinic acid and analogue of tetrahydrofolate | Serine hydroxymethyltransferase                         | glyA                         |
| <b>Carbenoxolone Sodium</b> | Synthetic derivative of glycyrrhetic acid                     | Pannexon membrane channels and related innexon channels | 11 $\beta$ -HSD              |
