# Supplementary material for: Engineering cell-free systems by chemoproteomic-assisted phenotypic screening
Source: Royal Society of Chemistry journal article supplement (doi:10.1039/d4cb00004h), 2024-01-01
Supplement: d4cb00004h4.pdf [file d4cb00004h4.pdf]

**Table S2 Cost calculation of drug treated CFPS reactions**

| Drug (TargetMol <sup>a</sup> )         | Cost (USD/mg) | Cost CFPS (USD/ L reaction) | % Cost (CrP/CrK) | % Cost (glucose) | nLuc Yield (µg/mL) | Cost efficiency (µg nLuc/USD) | Fold increase in cost efficiency <sup>b</sup> | Fold increase in cost efficiency <sup>c</sup> |
|----------------------------------------|---------------|-----------------------------|------------------|------------------|--------------------|-------------------------------|-----------------------------------------------|-----------------------------------------------|
| <b><i>Bosutinib</i></b>                | 0.88          | 46.68                       | 1.56%            | 4.67%            | 18.1               | 17.29                         | 4.80                                          | 2.51                                          |
| <b><i>Cerdulatinib</i></b>             | 2.16          | 96.23                       | 3.21%            | 9.62%            | 12.9               | 11.77                         | 3.27                                          | 1.71                                          |
| <b><i>Nafarelin Acetate</i></b>        | 2.16          | 302.52                      | 10.08%           | 30.25%           | 25.3               | 19.42                         | 5.40                                          | 2.82                                          |
| <b><i>Dasatinib</i></b>                | 0.20          | 58.56                       | 1.95%            | 5.86%            | 11.5               | 10.86                         | 3.02                                          | 1.57                                          |
| <b><i>Neratinib</i></b>                | 0.66          | 14.71                       | 0.49%            | 1.47%            | <i>N.A.</i>        | <i>N.A.</i>                   | <i>N.A.</i>                                   | <i>N.A.</i>                                   |
| <b><i>Afatinib</i></b>                 | 0.63          | 30.61                       | 1.02%            | 3.06%            | <i>N.A.</i>        | <i>N.A.</i>                   | <i>N.A.</i>                                   | <i>N.A.</i>                                   |
| <b><i>Polymyxin B</i></b>              | 0.03          | 4.16                        | 0.14%            | 0.42%            | <i>N.A.</i>        | <i>N.A.</i>                   | <i>N.A.</i>                                   | <i>N.A.</i>                                   |
| <b><i>Nafarelin + Cerdulatinib</i></b> | 4.32          | 398.75                      | 13.29%           | 39.87%           | 49.7               | 35.53                         | 9.87                                          | 5.15                                          |
| <b><i>Control (current)</i></b>        | 0.00          | 0.00                        | <i>N.A.</i>      | <i>N.A.</i>      | 6.9                | 6.90                          | 1.92                                          | 1.00                                          |
| <b><i>Control (reported)</i></b>       | 0.00          | 0.00                        | <i>N.A.</i>      | <i>N.A.</i>      | 3.6                | 3.60                          | 1.00                                          | 0.52                                          |

<sup>a</sup> Cost of drugs obtained from TargetMol website

<sup>b</sup> Fold increase in cost efficiency is calculated with respect to reported cost efficiency using optimised glucose system<sup>1</sup>

<sup>c</sup> Fold increase in cost efficiency is calculated with respect to cost efficiency of untreated control in the current study

#### Reference:

1. M. J. Anderson, J. C. Stark, C. E. Hodgman and M. C. Jewett, *FEBS Lett*, 2015, **589**, 1723-1727.
