# Supplementary material for: Engineering cell-free systems by chemoproteomic-assisted phenotypic screening
Source: Royal Society of Chemistry journal article supplement (doi:10.1039/d4cb00004h), 2024-01-01

Fig.2D Drug effect on p53 synthesis (trial 2)

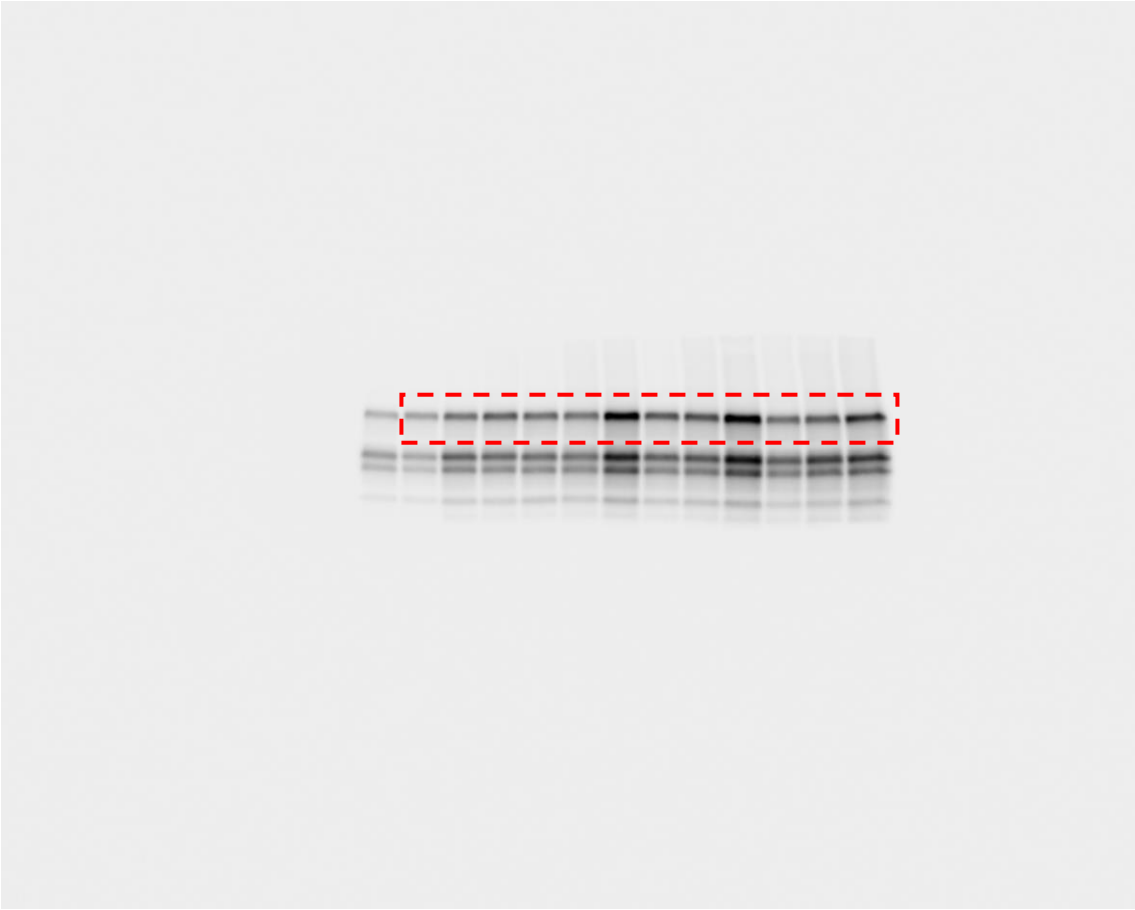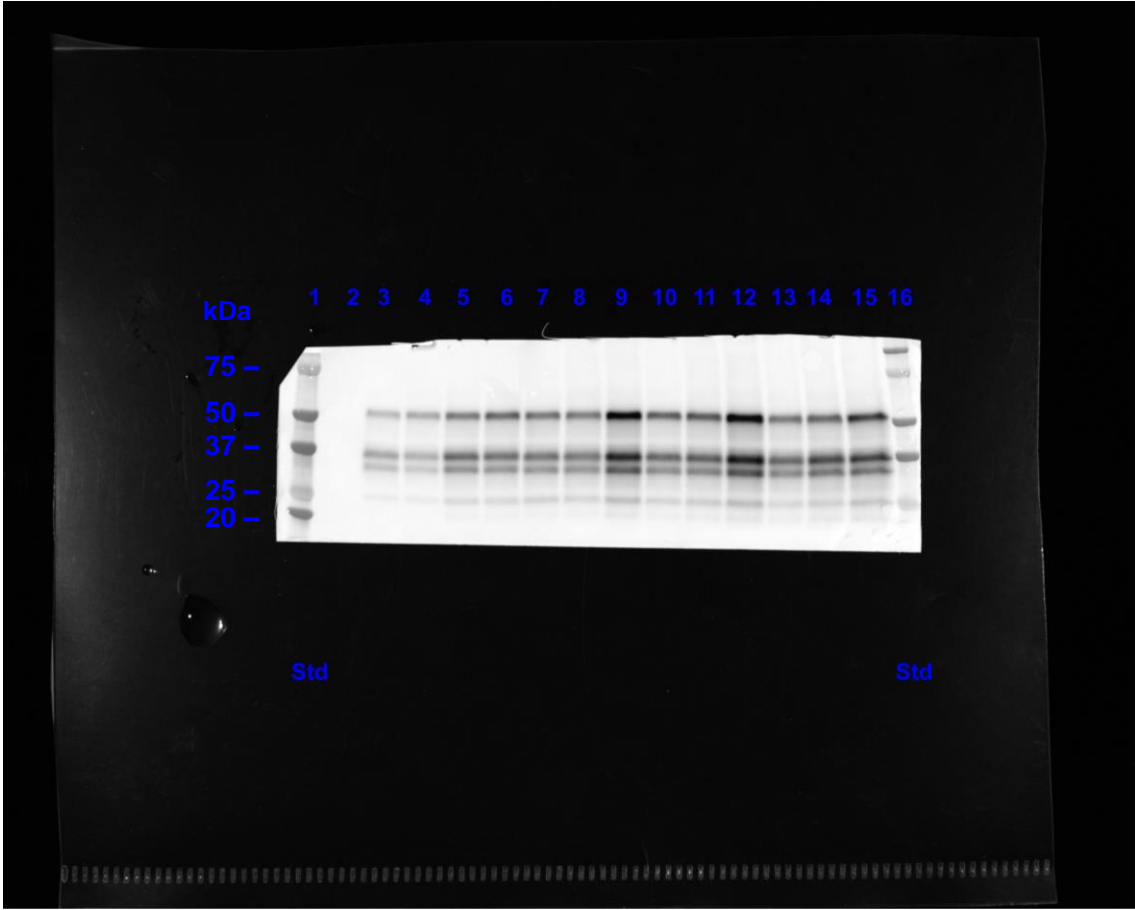

Fig.2D Drug effect on p53 synthesis (trial 3)

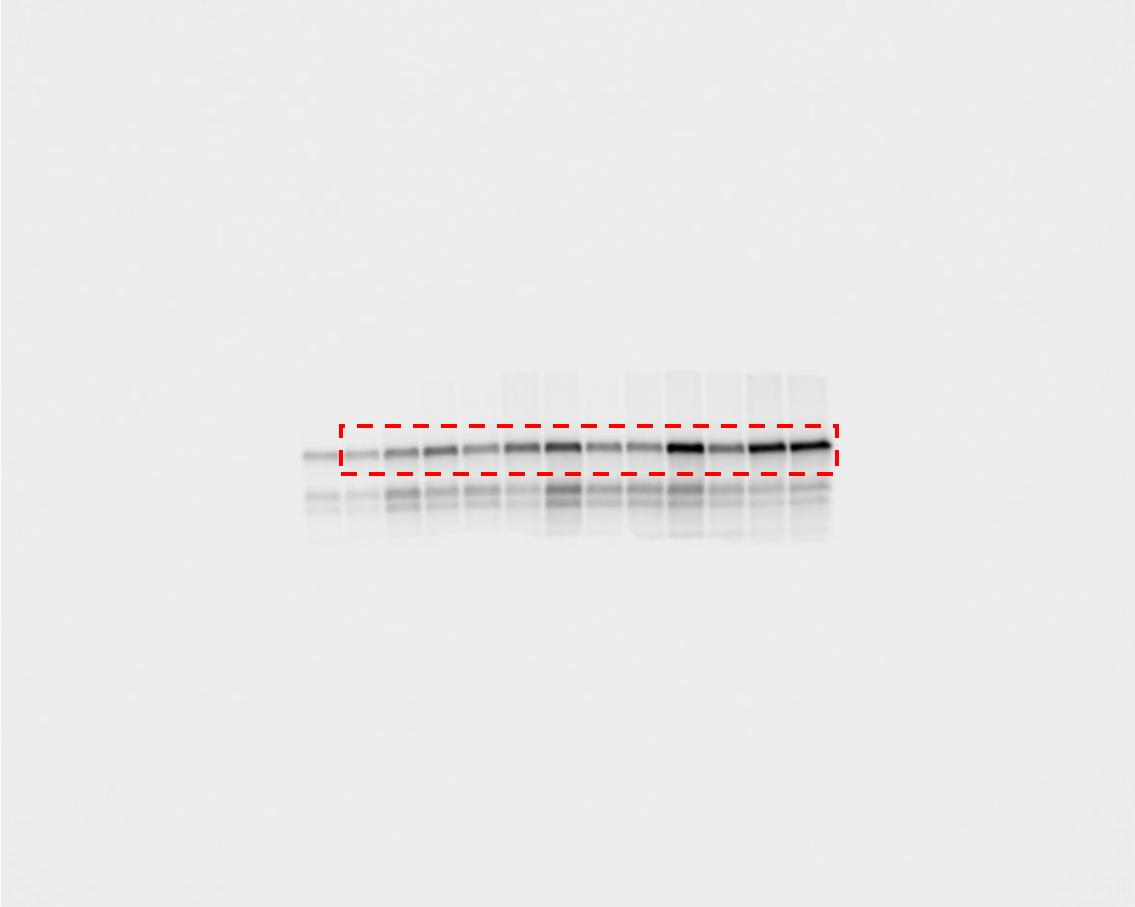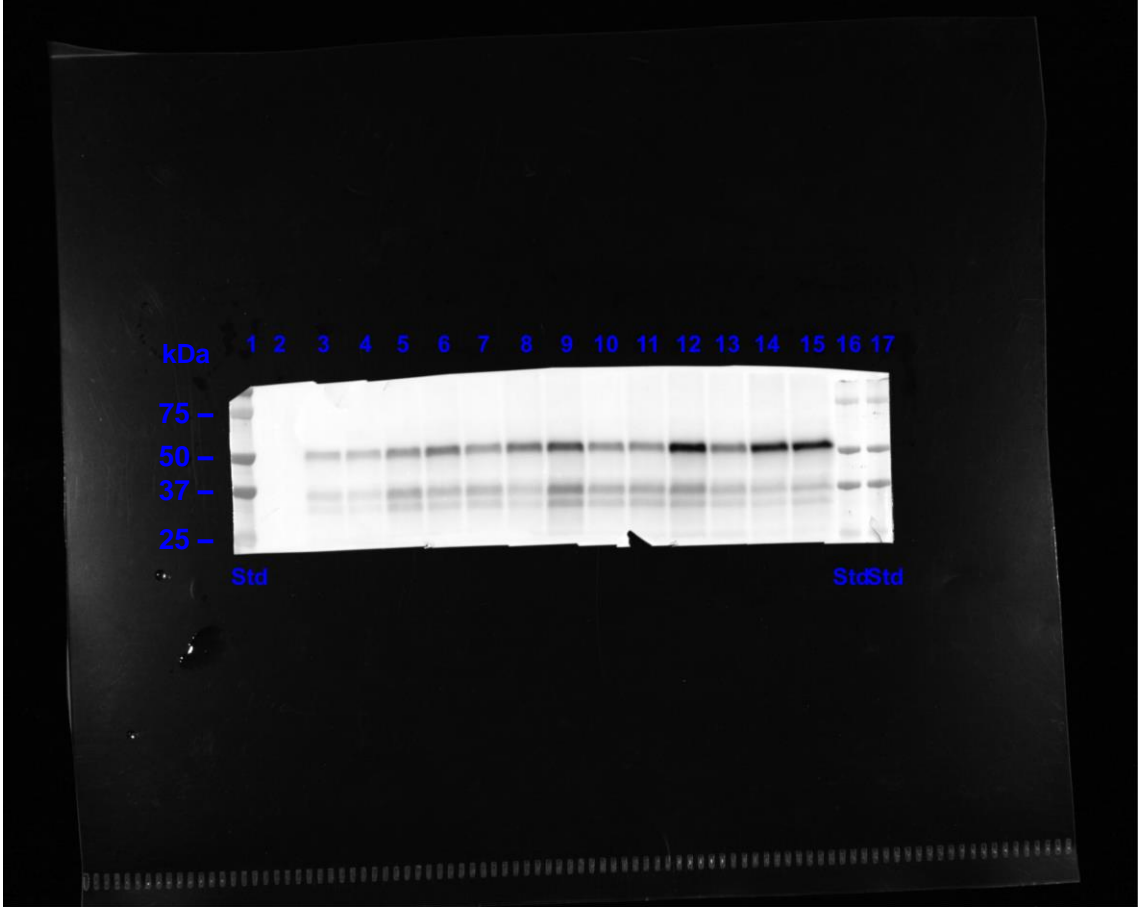

Fig.6C Mdm2 synthesis with WT and  $\Delta$ SSA1 extracts (trial 1)

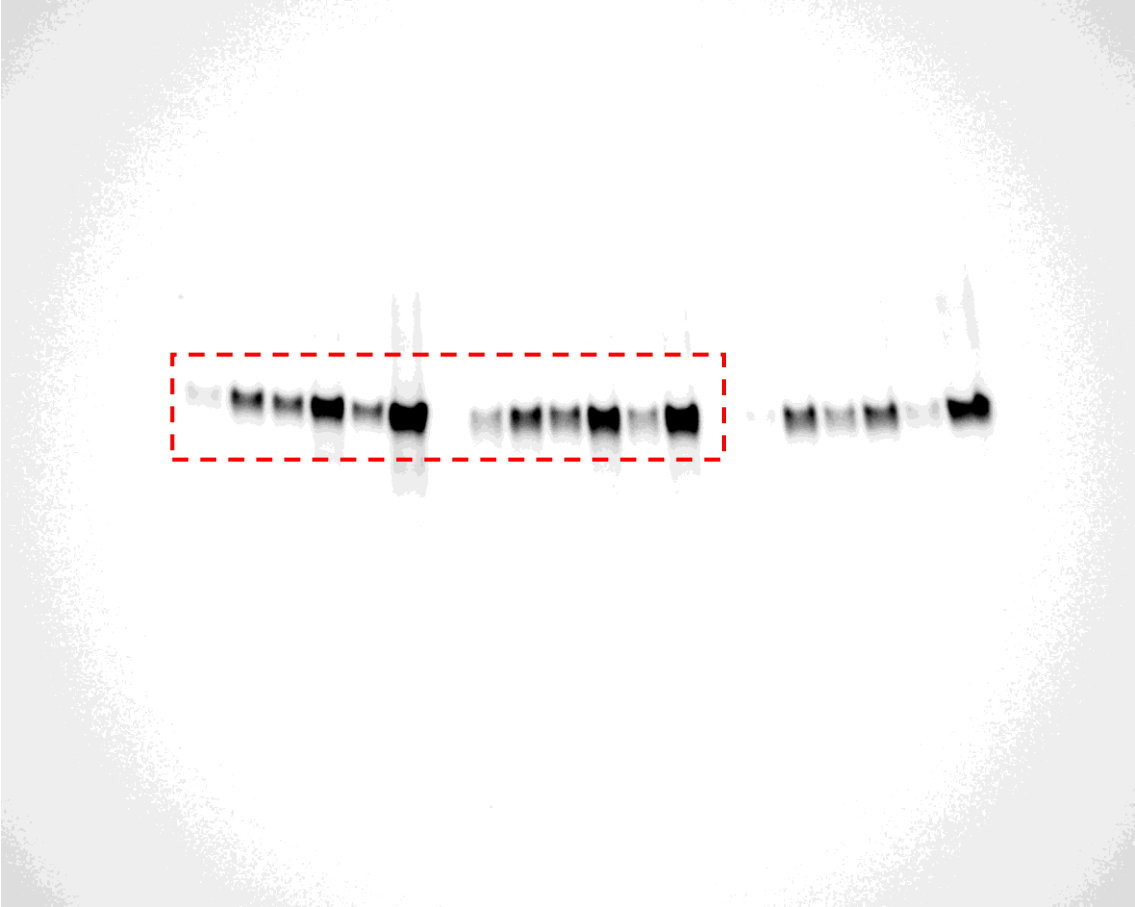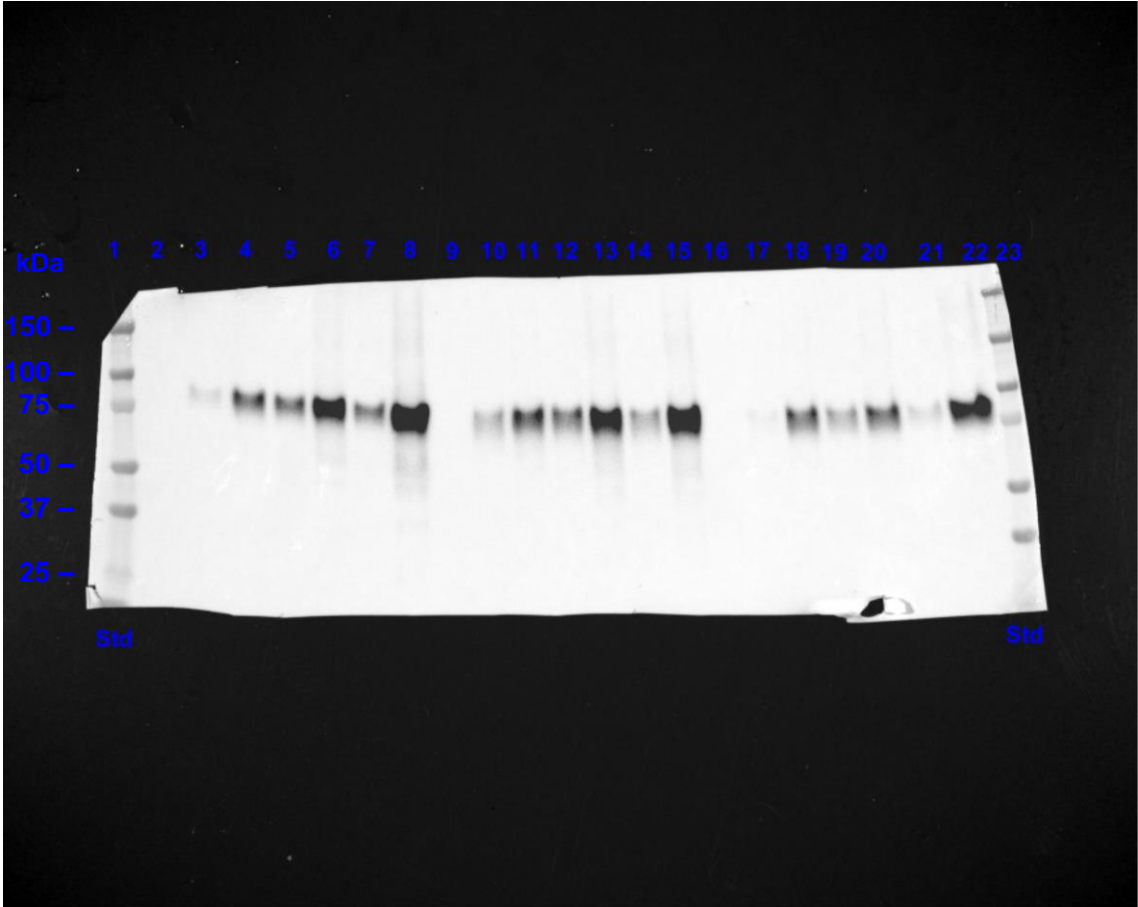

Fig.6C Mdm2 synthesis with WT and  $\Delta$ SSA1 extracts (trial 2)

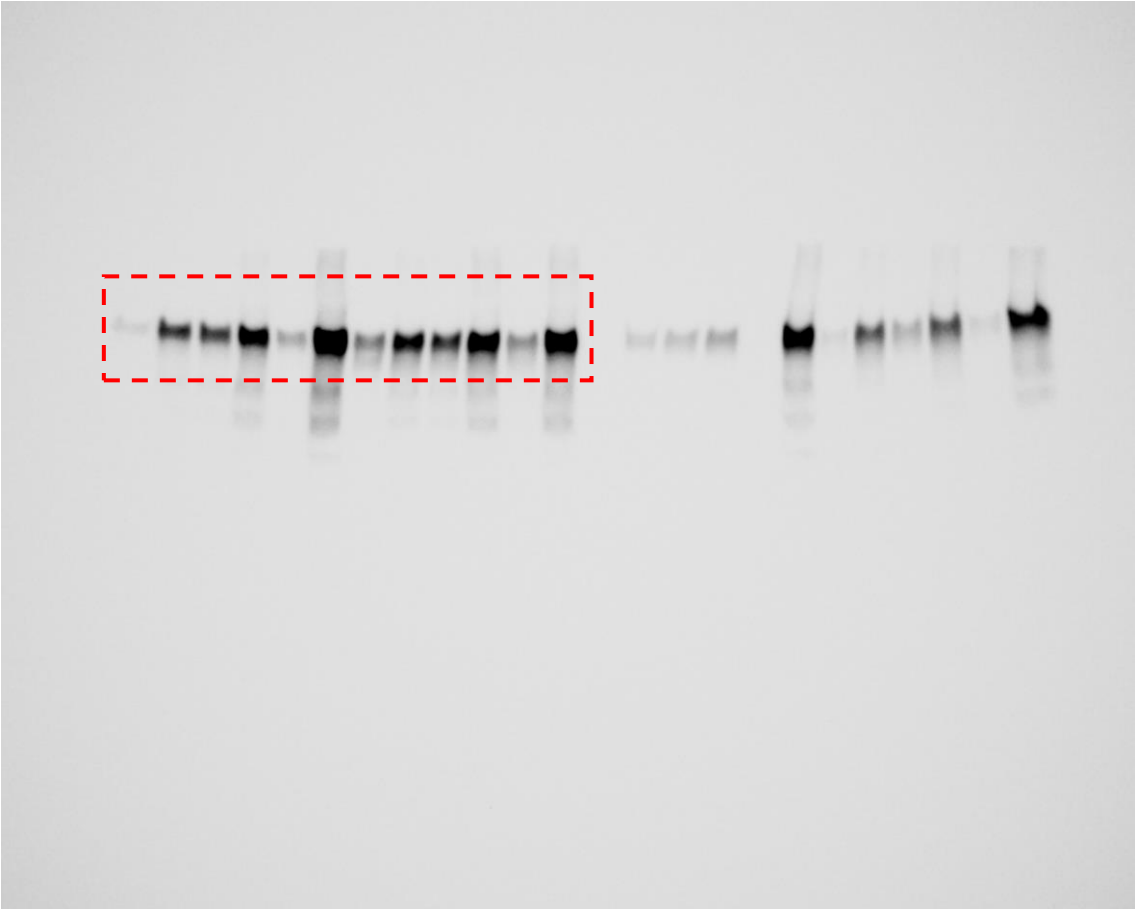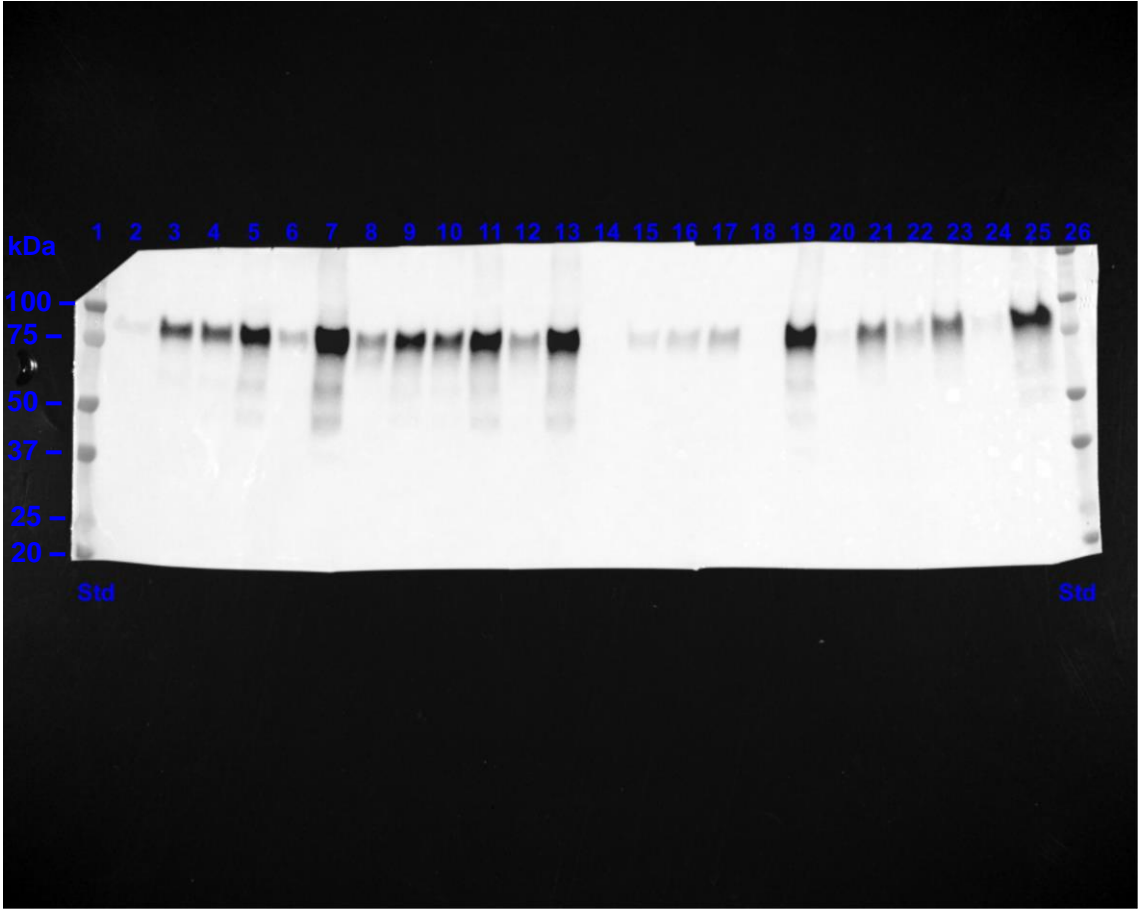

Supplement: d4cb00004h5.pdf [file d4cb00004h5.pdf]
